# Supplementary material for: Effects of agricultural management on phyllosphere fungal diversity in vineyards and the association with adjacent native forests
Source: PeerJ. 2018 Oct 29;6:e5715. doi: 10.7717/peerj.5715 (PMC6211267; doi:10.7717/peerj.5715)
Supplement: Table S1 — This table indicates the OTU identity, the normalized mean between groups, the log2 fold change and its standard error, the Wald statistics and their P-values, the P-value corrected for multiple comparisons (False Discovery Rare; FDR), and the taxonomic assignment from phylum to species. Red rows indicate OTUs that were significantly more abundant in conventional vineyards and blue rows indicate OTUs that were significantly more abundant in organic vineyards. [file peerj-06-5715-s002.xlsx]

## Sheet: SuppMat-ITS_DESeq_Management_OT
OTU	Normalized mean	Log2 Fold Change	LFC SE	Wald statistic	P-value	FDR P-value	Phylum	Class	Order	Family	Genus	Species
New.ReferenceOTU193	22.5062	1.65787	0.331441	5.00201	5.67369e-07	0.000236026	Ascomycota	Dothideomycetes	Dothideales	Dothioraceae	Aureobasidium	Aureobasidium pullulans
New.ReferenceOTU1454	10.537	2.32684	0.516011	4.50928	6.5049e-06	0.00117449	Ascomycota	Dothideomycetes	Dothideales	Dothioraceae	Aureobasidium	Aureobasidium pullulans
New.ReferenceOTU2346	5.3929	3.33528	0.749005	4.45295	8.46987e-06	0.00117449	Ascomycota	unidentified	unidentified	unidentified	unidentified	Ascomycota sp
New.ReferenceOTU897	3825.29	1.51447	0.35706	4.2415	2.22029e-05	0.0023091	Ascomycota	Dothideomycetes	Dothideales	Dothioraceae	Aureobasidium	Aureobasidium pullulans
New.ReferenceOTU579	69.2662	1.87046	0.479871	3.89783	9.7059e-05	0.0080753	Ascomycota	Dothideomycetes	Dothideales	Dothioraceae	Aureobasidium	Aureobasidium pullulans
New.ReferenceOTU1055	105.349	-1.49705	0.405393	-3.69284	0.000221767	0.0153759	Ascomycota	Leotiomycetes	Helotiales	Sclerotiniaceae	Botryotinia	Botryotinia fuckeliana
New.ReferenceOTU540	10.59	-6.76306	1.86037	-3.63533	0.000277623	0.0164987	Ascomycota	Dothideomycetes	Botryosphaeriales	Aplosporellaceae	Aplosporella	Aplosporella javeedii
New.ReferenceOTU929	8.25773	1.47209	0.429719	3.4257	0.000613213	0.0255165	Ascomycota	Sordariomycetes	Xylariales	Diatrypaceae	unidentified	Diatrypaceae sp
New.ReferenceOTU253	40.3462	1.92273	0.561278	3.42563	0.000613378	0.0255165	Ascomycota	Dothideomycetes	unidentified	unidentified	unidentified	Dothideomycetes sp
New.ReferenceOTU1701	6.63522	3.16582	0.909673	3.48018	0.000501085	0.0255165	Ascomycota	unidentified	unidentified	unidentified	unidentified	ascomycete sp MA 4921
New.ReferenceOTU2498	24.8501	1.32187	0.410337	3.22143	0.00127554	0.033308	Ascomycota	Dothideomycetes	unidentified	unidentified	unidentified	Dothideomycetes sp
New.ReferenceOTU2486	18.8408	2.21089	0.675671	3.27215	0.00106734	0.033308	Ascomycota	Sordariomycetes	Xylariales	unidentified	unidentified	Xylariales sp
New.ReferenceOTU153	2.58662	-3.46616	1.07061	-3.23757	0.00120554	0.033308	Basidiomycota	Agaricomycetes	Agaricales	unidentified	unidentified	Agaricales sp
New.ReferenceOTU366	2.79318	-3.35307	1.03664	-3.23455	0.00121836	0.033308	Ascomycota	Dothideomycetes	Patellariales	Patellariaceae	Rhytidhysteron	Rhytidhysteron sp
New.ReferenceOTU1392	9.33516	1.84867	0.574088	3.22019	0.00128108	0.033308	Ascomycota	Dothideomycetes	unidentified	unidentified	unidentified	Dothideomycetes sp
New.ReferenceOTU2432	152.3	1.32606	0.404962	3.27453	0.00105839	0.033308	Basidiomycota	Tremellomycetes	Tremellales	Incertae sedis	Cryptococcus	Cryptococcus chernovii
New.ReferenceOTU1332	19.1567	1.65391	0.522689	3.16424	0.00155488	0.0359351	Ascomycota	Dothideomycetes	Dothideales	Dothioraceae	Pringsheimia	Pringsheimia sp
New.ReferenceOTU1905	75.0039	-2.79435	0.882006	-3.16817	0.001534	0.0359351	Basidiomycota	Agaricomycetes	Agaricales	Agaricaceae	Calvatia	Calvatia pachydermica
New.ReferenceOTU616	1.61795	3.34096	1.10083	3.03493	0.00240591	0.0526768	Ascomycota	Leotiomycetes	Helotiales	Dermateaceae	Pezicula	Pezicula sp 3 ICMP 18931
New.ReferenceOTU1305	2.81153	3.47908	1.1729	2.96621	0.00301491	0.0627101	Ascomycota	unidentified	unidentified	unidentified	unidentified	uncultured Ascomycota
New.ReferenceOTU1781	2.4306	2.48192	0.84854	2.92493	0.00344538	0.0670746	unidentified	unidentified	unidentified	unidentified	unidentified	uncultured fungus
New.ReferenceOTU680	22.0214	-1.14663	0.393241	-2.91585	0.00354721	0.0670746	Ascomycota	Dothideomycetes	Capnodiales	Davidiellaceae	Davidiella	Davidiella tassiana
New.ReferenceOTU1409	1.59229	2.29336	0.814674	2.81507	0.00487669	0.0762286	Ascomycota	Dothideomycetes	Capnodiales	unidentified	unidentified	Capnodiales sp
New.ReferenceOTU608	3.62709	1.24821	0.443461	2.8147	0.00488232	0.0762286	Ascomycota	Dothideomycetes	Capnodiales	unidentified	unidentified	Capnodiales sp
New.ReferenceOTU390	7.84077	-1.47092	0.52148	-2.82066	0.0047925	0.0762286	Ascomycota	Dothideomycetes	Pleosporales	Pleosporaceae	Alternaria	Alternaria leptinellae
New.ReferenceOTU10	7.91607	1.76702	0.628737	2.81043	0.00494753	0.0762286	Ascomycota	Dothideomycetes	unidentified	unidentified	unidentified	Dothideomycetes sp
New.ReferenceOTU38	3.3428	-2.25619	0.800689	-2.81781	0.00483517	0.0762286	Basidiomycota	Pucciniomycetes	Pucciniales	Uropyxidaceae	Tranzschelia	Tranzschelia discolor
New.ReferenceOTU1257	13.3894	1.60262	0.57546	2.78494	0.00535384	0.0795427	Ascomycota	Dothideomycetes	Pleosporales	unidentified	unidentified	Pleosporales sp
New.ReferenceOTU1449	4.16821	-1.92764	0.704972	-2.73435	0.00625037	0.0896604	Basidiomycota	Ustilaginomycetes	Urocystidales	Glomosporiaceae	Thecaphora	Thecaphora oxytropis
New.ReferenceOTU1880	37.3244	0.760258	0.282416	2.69198	0.00710289	0.0938506	Ascomycota	Dothideomycetes	Capnodiales	Mycosphaerellaceae	Mycosphaerella	Mycosphaerella pseudocryptica
New.ReferenceOTU1545	3.07277	-1.92936	0.713754	-2.70312	0.00686918	0.0938506	Ascomycota	Dothideomycetes	Pleosporales	Pleosporaceae	Bipolaris	Bipolaris melinidis
New.ReferenceOTU803	21.6035	-1.47656	0.54961	-2.68656	0.00721928	0.0938506	Ascomycota	Dothideomycetes	Hysteriales	Hysteriaceae	Gloniopsis	Gloniopsis sp MFLUCC 12_0010
New.ReferenceOTU291	2.43518	1.7599	0.660378	2.66499	0.00769907	0.097055	Ascomycota	Sordariomycetes	Xylariales	Amphisphaeriaceae	unidentified	Amphisphaeriaceae sp
New.ReferenceOTU2011	2.49295	-3.45398	1.31599	-2.62463	0.00867427	0.106132	Ascomycota	Dothideomycetes	Pleosporales	Pleosporaceae	Bipolaris	Bipolaris sp HSAUP074449
New.ReferenceOTU1212	14.8361	1.32073	0.50953	2.59205	0.00954056	0.113396	Ascomycota	Dothideomycetes	Dothideales	unidentified	unidentified	Dothideales sp
New.ReferenceOTU727	34.2552	-0.969162	0.384617	-2.51981	0.0117418	0.135482	Basidiomycota	Ustilaginomycetes	Ustilaginales	Ustilaginaceae	unidentified	Ustilaginaceae sp
New.ReferenceOTU2152	5.40473	1.65841	0.660544	2.51067	0.0120501	0.135482	Basidiomycota	Agaricomycetes	Agaricales	Psathyrellaceae	Coprinellus	Coprinellus sp
New.ReferenceOTU240	5.67045	1.73656	0.697376	2.49013	0.0127695	0.139792	Ascomycota	Dothideomycetes	Pleosporales	Cucurbitariaceae	Pyrenochaetopsis	Pyrenochaetopsis sp
New.ReferenceOTU438	921.934	-0.437585	0.177511	-2.46511	0.0136972	0.140047	Ascomycota	Dothideomycetes	Pleosporales	Pleosporaceae	Pleospora	Pleospora herbarum
New.ReferenceOTU1352	1.53151	1.88551	0.763929	2.46817	0.0135804	0.140047	Ascomycota	Eurotiomycetes	Chaetothyriales	Herpotrichiellaceae	Phaeomoniella	Phaeomoniella sp
New.ReferenceOTU885	1329.43	-0.396003	0.161948	-2.44525	0.0144754	0.140047	Ascomycota	Dothideomycetes	Pleosporales	Pleosporaceae	Alternaria	Alternaria eichhorniae
New.ReferenceOTU1696	2.42893	-2.32159	0.949438	-2.44523	0.0144761	0.140047	Basidiomycota	Agaricomycetes	Agaricales	unidentified	unidentified	Agaricales sp
New.ReferenceOTU70	30891.2	-0.779873	0.318213	-2.45079	0.0142544	0.140047	Ascomycota	Dothideomycetes	Capnodiales	Davidiellaceae	Davidiella	Davidiella tassiana
New.ReferenceOTU213	5.44316	1.40688	0.58261	2.41479	0.0157441	0.148854	Basidiomycota	Agaricomycetes	Polyporales	Ganodermataceae	Ganoderma	Ganoderma australe
New.ReferenceOTU796	2.54839	2.59202	1.08797	2.38243	0.0171986	0.158991	Ascomycota	unidentified	unidentified	unidentified	unidentified	Ascomycota sp
New.ReferenceOTU968	1.43276	-1.72872	0.738498	-2.34087	0.0192391	0.170287	Basidiomycota	Agaricomycetes	Agaricales	Agaricaceae	Mycenastrum	Mycenastrum corium
New.ReferenceOTU1390	1.99389	-2.29433	0.977719	-2.34662	0.0189447	0.170287	Ascomycota	Dothideomycetes	unidentified	unidentified	unidentified	Dothideomycetes sp
New.ReferenceOTU2327	5.69256	-1.52607	0.659647	-2.31346	0.0206974	0.179378	Basidiomycota	unidentified	unidentified	unidentified	unidentified	uncultured Basidiomycota
New.ReferenceOTU2080	2.9893	-1.60551	0.703418	-2.28244	0.0224636	0.190711	Basidiomycota	Ustilaginomycetes	Ustilaginales	Ustilaginaceae	Ustilago	Ustilago echinata
New.ReferenceOTU2389	1.29981	2.30073	1.01932	2.25711	0.0240009	0.199688	Ascomycota	Dothideomycetes	Capnodiales	Incertae sedis	Meristemomyces	Meristemomyces frigidus
New.ReferenceOTU1067	950.392	-0.361907	0.161566	-2.24	0.025091	0.204664	Ascomycota	Dothideomycetes	Pleosporales	Pleosporaceae	Lewia	Lewia infectoria
New.ReferenceOTU1922	5.41593	-1.5906	0.719464	-2.21081	0.0270491	0.216393	Ascomycota	Dothideomycetes	Botryosphaeriales	Incertae sedis	Camarosporium	Camarosporium aloes
New.ReferenceOTU2078	10.6699	1.42789	0.648617	2.20144	0.0277052	0.21746	Ascomycota	Sordariomycetes	Xylariales	Amphisphaeriaceae	Pestalotiopsis	Pestalotiopsis sp HC02
New.ReferenceOTU665	19.477	-1.3039	0.610462	-2.13592	0.0326861	0.226624	Ascomycota	Dothideomycetes	Pleosporales	unidentified	unidentified	Pleosporales sp
New.ReferenceOTU2304	18.1665	1.23435	0.575927	2.14325	0.032093	0.226624	unidentified	unidentified	unidentified	unidentified	unidentified	uncultured fungus
New.ReferenceOTU2315	12.0219	1.13366	0.523456	2.16572	0.0303327	0.226624	Ascomycota	Leotiomycetes	Helotiales	Incertae sedis	Glarea	Glarea lozoyensis
New.ReferenceOTU1138	18.3138	-0.994288	0.457639	-2.17265	0.029807	0.226624	Ascomycota	Dothideomycetes	Capnodiales	Mycosphaerellaceae	Mycosphaerella	Mycosphaerella sp KH00254
New.ReferenceOTU512	1.32483	3.1984	1.49433	2.14036	0.0323258	0.226624	Ascomycota	Dothideomycetes	Hysteriales	Gloniaceae	Cenococcum	uncultured Cenococcum
New.ReferenceOTU57	29.0802	0.677484	0.313501	2.16102	0.0306935	0.226624	Ascomycota	Dothideomycetes	Capnodiales	Davidiellaceae	Cladosporium	Cladosporium exasperatum
New.ReferenceOTU2368	23.578	0.94565	0.440455	2.14699	0.0317944	0.226624	Basidiomycota	Ustilaginomycetes	Ustilaginales	Ustilaginaceae	unidentified	Ustilaginaceae sp
New.ReferenceOTU1370	12.2946	-1.11852	0.525942	-2.12669	0.0334458	0.228089	Ascomycota	Dothideomycetes	Pleosporales	Pleosporaceae	unidentified	Pleosporaceae sp
New.ReferenceOTU1421	24.1862	0.983971	0.469856	2.0942	0.0362424	0.228437	Basidiomycota	Tremellomycetes	Tremellales	Incertae sedis	Cryptococcus	Cryptococcus saitoi
New.ReferenceOTU1788	7.13807	-1.45239	0.691113	-2.10152	0.035595	0.228437	Ascomycota	Dothideomycetes	Pleosporales	Phaeosphaeriaceae	Neostagonospora	Neostagonospora caricis
New.ReferenceOTU1256	2.73689	-1.44529	0.687635	-2.10183	0.0355683	0.228437	Ascomycota	Dothideomycetes	Pleosporales	Pleosporaceae	unidentified	Pleosporaceae sp
New.ReferenceOTU2280	216.872	0.827209	0.394893	2.09477	0.0361915	0.228437	Basidiomycota	Tremellomycetes	Tremellales	Incertae sedis	Cryptococcus	Cryptococcus victoriae
New.ReferenceOTU1496	39.3524	-1.03697	0.490437	-2.11437	0.0344833	0.228437	unidentified	unidentified	unidentified	unidentified	unidentified	Fungi sp
New.ReferenceOTU2324	2.10254	-2.01441	0.967926	-2.08116	0.0374195	0.232336	Ascomycota	Dothideomycetes	Pleosporales	unidentified	unidentified	Pleosporales sp
New.ReferenceOTU761	3.95499	1.51969	0.734465	2.06911	0.0385354	0.235746	Ascomycota	Sordariomycetes	Diaporthales	Valsaceae	Cytospora	Cytospora austromontana
New.ReferenceOTU102	4.29087	1.27326	0.621456	2.04883	0.0404784	0.240558	Basidiomycota	Tremellomycetes	Tremellales	Incertae sedis	Cryptococcus	Cryptococcus magnus
New.ReferenceOTU285	1.78941	-2.19605	1.06986	-2.05266	0.0401058	0.240558	Ascomycota	Leotiomycetes	Erysiphales	Erysiphaceae	Erysiphe	Erysiphe convolvuli
New.ReferenceOTU587	13.1766	1.52735	0.770121	1.98326	0.0473387	0.277365	Ascomycota	Dothideomycetes	Pleosporales	Pleosporaceae	Pyrenophora	Pyrenophora bromi
New.ReferenceOTU2463	3.06853	-4.53246	2.31461	-1.9582	0.0502068	0.290084	Ascomycota	Saccharomycetes	Saccharomycetales	Incertae sedis	unidentified	Saccharomycetales sp
New.ReferenceOTU1498	12.7778	-1.37398	0.705211	-1.94833	0.0513759	0.292772	Ascomycota	Dothideomycetes	Capnodiales	Capnodiaceae	Capnodium	Capnodium citri
New.ReferenceOTU1463	1.4997	-2.0413	1.06079	-1.92431	0.0543156	0.302144	Ascomycota	Dothideomycetes	unidentified	unidentified	unidentified	Dothideomycetes sp
New.ReferenceOTU1181	17.2238	1.10758	0.575946	1.92305	0.0544732	0.302144	Ascomycota	Dothideomycetes	Dothideales	Dothioraceae	Pringsheimia	Pringsheimia sp
New.ReferenceOTU920	38.6333	0.91631	0.484198	1.89243	0.0584341	0.307034	Ascomycota	Dothideomycetes	Dothideales	Dothideaceae	Endoconidioma	Endoconidioma populi
New.ReferenceOTU280	6.75108	-1.00564	0.531279	-1.89286	0.0583763	0.307034	Ascomycota	Eurotiomycetes	Eurotiales	Trichocomaceae	Penicillium	Penicillium brevicompactum
New.ReferenceOTU256	1.69475	1.78032	0.940143	1.89367	0.0582695	0.307034	Ascomycota	Dothideomycetes	Pleosporales	Cucurbitariaceae	Curreya	Curreya sp
New.ReferenceOTU1280	9.95669	-0.902604	0.47811	-1.88786	0.0590449	0.307034	Ascomycota	unidentified	unidentified	unidentified	unidentified	Ascomycota sp AR_2010
New.ReferenceOTU1981	5.0607	0.842735	0.444369	1.89647	0.0578975	0.307034	Ascomycota	Dothideomycetes	Dothideales	Dothioraceae	Aureobasidium	Aureobasidium pullulans
New.ReferenceOTU2431	1.44561	-1.33446	0.717735	-1.85927	0.0629892	0.3235	Ascomycota	Dothideomycetes	Pleosporales	Incertae sedis	Phoma	Phoma sp
New.ReferenceOTU1318	12.5315	0.846678	0.460759	1.83757	0.0661254	0.3257	Basidiomycota	Tremellomycetes	Tremellales	Incertae sedis	Cryptococcus	Cryptococcus heimaeyensis
New.ReferenceOTU149	1.46595	2.12557	1.16056	1.8315	0.0670257	0.3257	Ascomycota	Dothideomycetes	Myriangiales	unidentified	unidentified	Myriangiales sp
New.ReferenceOTU1113	11.6747	-0.88487	0.48203	-1.83572	0.0663996	0.3257	Ascomycota	Sordariomycetes	Diaporthales	Incertae sedis	Harknessia	Harknessia ravenstreetina
New.ReferenceOTU198	1.98306	-1.37763	0.75303	-1.82945	0.0673323	0.3257	Ascomycota	unidentified	unidentified	unidentified	unidentified	Ascomycota sp
New.ReferenceOTU2406	32.6703	0.941873	0.512416	1.8381	0.0660472	0.3257	Ascomycota	Dothideomycetes	Pleosporales	Incertae sedis	Didymella	Didymella sp
New.ReferenceOTU423	2.95787	1.36313	0.74744	1.82373	0.0681933	0.326074	Ascomycota	Dothideomycetes	unidentified	unidentified	unidentified	Dothideomycetes sp
New.ReferenceOTU1852	2.42668	1.43398	0.792345	1.80979	0.0703281	0.33246	Ascomycota	Dothideomycetes	unidentified	unidentified	unidentified	Dothideomycetes sp
New.ReferenceOTU2317	25.7395	0.868891	0.483321	1.79775	0.0722162	0.333799	Ascomycota	Sordariomycetes	Sordariales	Sordariaceae	Sordaria	Sordaria sp SS_1479
New.ReferenceOTU1458	4.42245	1.32675	0.737032	1.80012	0.071841	0.333799	Ascomycota	Dothideomycetes	Capnodiales	unidentified	unidentified	Capnodiales sp
New.ReferenceOTU1936	3.51769	1.28744	0.723214	1.78017	0.0750483	0.338175	Basidiomycota	Tremellomycetes	Tremellales	Incertae sedis	unidentified	Tremellales sp
New.ReferenceOTU1651	5.0426	-0.745351	0.419678	-1.77601	0.075732	0.338175	Basidiomycota	Ustilaginomycetes	Ustilaginales	Ustilaginaceae	Sporisorium	Sporisorium puellare
New.ReferenceOTU135	1.31035	1.79849	1.0288	1.74815	0.0804384	0.338175	Ascomycota	Leotiomycetes	Helotiales	Incertae sedis	Naevala	Naevala sp
New.ReferenceOTU1554	30.6192	-0.546469	0.312641	-1.74791	0.0804791	0.338175	Ascomycota	Dothideomycetes	Capnodiales	Davidiellaceae	Cladosporium	Cladosporium exasperatum
New.ReferenceOTU1395	13.7817	1.4419	0.807069	1.78659	0.0740041	0.338175	Ascomycota	Dothideomycetes	Pleosporales	Pleosporaceae	unidentified	Pleosporaceae sp
New.ReferenceOTU2384	2.86914	-1.34827	0.763956	-1.76485	0.0775886	0.338175	Ascomycota	Dothideomycetes	Capnodiales	unidentified	unidentified	Capnodiales sp
New.ReferenceOTU1207	1.98622	1.03211	0.586835	1.75877	0.078616	0.338175	Ascomycota	Dothideomycetes	Dothideales	Dothioraceae	Aureobasidium	Aureobasidium pullulans
New.ReferenceOTU1035	43.5791	0.743676	0.424469	1.75202	0.0797711	0.338175	Ascomycota	unidentified	unidentified	unidentified	unidentified	Ascomycota sp
New.ReferenceOTU1601	5.28224	1.13128	0.643273	1.75863	0.0786407	0.338175	unidentified	unidentified	unidentified	unidentified	unidentified	fungal sp P1S14
New.ReferenceOTU2224	10.8833	0.885823	0.514993	1.72007	0.0854204	0.354817	Ascomycota	Dothideomycetes	Pleosporales	Phaeosphaeriaceae	Sclerostagonospora	Sclerostagonospora sp 87 YS_2010
New.ReferenceOTU682	3.02636	1.52121	0.88644	1.71609	0.0861454	0.354817	Ascomycota	Dothideomycetes	Pleosporales	unidentified	unidentified	Pleosporales sp
New.ReferenceOTU662	2.67646	-1.23954	0.72661	-1.70592	0.0880235	0.358998	Basidiomycota	Ustilaginomycetes	Ustilaginales	unidentified	unidentified	Ustilaginales sp
New.ReferenceOTU1923	17.1907	0.972762	0.574862	1.69217	0.0906139	0.364201	Ascomycota	Eurotiomycetes	Chaetothyriales	Herpotrichiellaceae	Exophiala	Exophiala eucalyptorum
New.ReferenceOTU422	5.75015	-1.50244	0.89032	-1.68752	0.0915028	0.364201	Ascomycota	Eurotiomycetes	Chaetothyriales	Herpotrichiellaceae	unidentified	uncultured Herpotrichiellaceae
New.ReferenceOTU1462	5.75894	-0.912596	0.542674	-1.68167	0.0926338	0.364201	Ascomycota	Eurotiomycetes	Chaetothyriales	unidentified	unidentified	Chaetothyriales sp
New.CleanUp.ReferenceOTU5030	6.65336	-1.26491	0.752563	-1.6808	0.0928013	0.364201	Ascomycota	Dothideomycetes	Pleosporales	Sporormiaceae	unidentified	Sporormiaceae sp
New.ReferenceOTU1016	59.7283	-0.965942	0.578645	-1.66932	0.0950546	0.369558	Ascomycota	Dothideomycetes	Capnodiales	Capnodiaceae	Capnodium	Capnodium sp
New.ReferenceOTU50	1.86559	-1.7166	1.03322	-1.6614	0.0966337	0.370444	Ascomycota	Dothideomycetes	Pleosporales	unidentified	unidentified	Pleosporales sp
New.ReferenceOTU2408	48.1972	-0.698604	0.421033	-1.65926	0.0970634	0.370444	Ascomycota	unidentified	unidentified	unidentified	unidentified	ascomycete sp MA 4907
New.ReferenceOTU2221	107.858	0.579143	0.350848	1.65069	0.0988012	0.373143	Ascomycota	Dothideomycetes	Dothideales	Dothioraceae	Hormonema	Hormonema sp
New.ReferenceOTU2311	14.2106	0.778771	0.472851	1.64697	0.0995645	0.373143	Ascomycota	Dothideomycetes	Pleosporales	Incertae sedis	Phoma	Phoma sp
New.ReferenceOTU895	8.26548	1.09428	0.672832	1.62637	0.103871	0.385806	Ascomycota	Dothideomycetes	Pleosporales	unidentified	unidentified	fungal endophyte WMS23
New.ReferenceOTU413	159.568	-0.468682	0.290777	-1.61183	0.107	0.39391	Ascomycota	Dothideomycetes	Capnodiales	Davidiellaceae	Cladosporium	Cladosporium exasperatum
New.ReferenceOTU1320	2.27464	-1.50777	0.939439	-1.60496	0.108502	0.395936	Ascomycota	Dothideomycetes	Capnodiales	unidentified	unidentified	Capnodiales sp M_Camp7
New.ReferenceOTU20	5.48605	1.33129	0.833307	1.5976	0.110132	0.398391	Ascomycota	Dothideomycetes	unidentified	unidentified	unidentified	dothideomycete sp 7683
New.ReferenceOTU1143	4.64136	1.01121	0.63762	1.58592	0.112758	0.404372	Ascomycota	unidentified	unidentified	unidentified	unidentified	Ascomycota sp
New.ReferenceOTU2499	38.2033	-0.618088	0.392088	-1.5764	0.114933	0.406261	Ascomycota	unidentified	unidentified	unidentified	unidentified	Ascomycota sp
New.ReferenceOTU1900	102.111	-1.38198	0.879754	-1.57087	0.116214	0.406261	Ascomycota	Saccharomycetes	Saccharomycetales	Metschnikowiaceae	Metschnikowia	Metschnikowia chrysoperlae
New.ReferenceOTU2165	18.5789	-0.731551	0.465225	-1.57247	0.115843	0.406261	Ascomycota	Sordariomycetes	Xylariales	Amphisphaeriaceae	Truncatella	Truncatella spadicea
New.ReferenceOTU556	8.66852	-0.995985	0.636298	-1.56528	0.117517	0.407393	Ascomycota	Dothideomycetes	Capnodiales	Mycosphaerellaceae	Mycosphaerella	Mycosphaerella arbuticola
New.ReferenceOTU158	1.33406	-1.68069	1.08221	-1.55302	0.120418	0.410607	Ascomycota	Dothideomycetes	Dothideales	Dothioraceae	Sydowia	Sydowia japonica
New.ReferenceOTU645	1.61459	-1.49781	0.963248	-1.55495	0.119957	0.410607	Ascomycota	Dothideomycetes	Pleosporales	Phaeosphaeriaceae	Phaeosphaeria	Phaeosphaeria sp
New.ReferenceOTU760	5.72972	-1.01115	0.65927	-1.53374	0.125093	0.413585	Ascomycota	Dothideomycetes	unidentified	unidentified	unidentified	Dothideomycetes sp
New.ReferenceOTU1001	19.1208	-0.831707	0.54114	-1.53695	0.124304	0.413585	Ascomycota	unidentified	unidentified	unidentified	unidentified	Ascomycota sp
New.ReferenceOTU1288	2.26043	1.32421	0.860056	1.53968	0.123638	0.413585	Ascomycota	Dothideomycetes	Capnodiales	Incertae sedis	Capnobotryella	Capnobotryella sp
New.CleanUp.ReferenceOTU2483	1.57738	1.47827	0.964281	1.53303	0.125269	0.413585	Ascomycota	Dothideomycetes	Pleosporales	unidentified	unidentified	fungal endophyte WMS23
New.ReferenceOTU274	1.75558	1.16288	0.774729	1.50101	0.133353	0.436809	Ascomycota	Eurotiomycetes	Mycocaliciales	Mycocaliciaceae	Chaenothecopsis	Chaenothecopsis pusilla
New.ReferenceOTU1296	3.19683	0.872	0.583674	1.49398	0.13518	0.439334	Basidiomycota	Tremellomycetes	unidentified	unidentified	unidentified	Tremellomycetes sp
New.ReferenceOTU2474	2.57584	0.822455	0.553845	1.48499	0.137546	0.44161	Ascomycota	Dothideomycetes	Capnodiales	Davidiellaceae	Davidiella	Davidiella tassiana
New.ReferenceOTU812	1.51889	-1.24678	0.840564	-1.48327	0.138003	0.44161	Ascomycota	Sordariomycetes	Hypocreales	Nectriaceae	Fusarium	Fusarium tricinctum
New.ReferenceOTU774	1.45125	1.15349	0.781509	1.47598	0.13995	0.442377	Basidiomycota	Microbotryomycetes	Sporidiobolales	Incertae sedis	Sporobolomyces	Sporobolomyces coprosmae
New.ReferenceOTU1867	1.43908	-1.5716	1.06591	-1.47442	0.14037	0.442377	Ascomycota	Leotiomycetes	Erysiphales	Erysiphaceae	Erysiphe	Erysiphe betae
New.ReferenceOTU828	1.39854	-1.20183	0.81792	-1.46938	0.14173	0.443307	Ascomycota	Eurotiomycetes	Eurotiales	Trichocomaceae	Talaromyces	Talaromyces amestolkiae
New.ReferenceOTU831	1.99325	1.41205	0.969996	1.45572	0.145469	0.451605	Ascomycota	Dothideomycetes	Dothideales	Dothioraceae	Aureobasidium	Aureobasidium pullulans
New.ReferenceOTU2172	5.19134	-0.877078	0.610788	-1.43598	0.151008	0.46533	Ascomycota	Dothideomycetes	Pleosporales	Sporormiaceae	unidentified	Sporormiaceae sp
New.ReferenceOTU1787	9.25591	-0.824771	0.582196	-1.41665	0.156584	0.468626	unidentified	unidentified	unidentified	unidentified	unidentified	uncultured fungus
New.ReferenceOTU1584	2.16155	-1.16686	0.819335	-1.42416	0.154401	0.468626	Ascomycota	Dothideomycetes	Pleosporales	Sporormiaceae	Sporormiella	Sporormiella australis
New.ReferenceOTU1459	7.42991	0.763687	0.53851	1.41815	0.156147	0.468626	Ascomycota	Sordariomycetes	Xylariales	Amphisphaeriaceae	Seimatosporium	Seimatosporium hypericinum
New.ReferenceOTU483	34.0388	-0.524632	0.368239	-1.4247	0.154243	0.468626	Ascomycota	Eurotiomycetes	Chaetothyriales	Incertae sedis	Coniosporium	Coniosporium sp h6
New.ReferenceOTU946	1.82259	-1.36444	0.975085	-1.3993	0.161723	0.478891	Ascomycota	unidentified	unidentified	unidentified	unidentified	Ascomycota sp
New.ReferenceOTU801	3.86905	-0.977723	0.699711	-1.39732	0.162316	0.478891	Ascomycota	Dothideomycetes	Pleosporales	Corynesporascaceae	Corynespora	Corynespora proliferata
New.ReferenceOTU2443	5.40477	0.699193	0.501993	1.39283	0.16367	0.479485	Basidiomycota	Tremellomycetes	Tremellales	Incertae sedis	Cryptococcus	Cryptococcus wieringae
New.ReferenceOTU1337	1.51442	4.04358	2.92648	1.38172	0.167057	0.485096	Ascomycota	Dothideomycetes	Botryosphaeriales	Incertae sedis	Homortomyces	Homortomyces combreti
New.ReferenceOTU1177	3.32553	0.7762	0.562902	1.37893	0.167918	0.485096	Basidiomycota	Microbotryomycetes	Sporidiobolales	Incertae sedis	Sporobolomyces	Sporobolomyces ruberrimus
New.ReferenceOTU1512	1.5609	0.888254	0.646555	1.37383	0.169495	0.486276	Ascomycota	Dothideomycetes	Capnodiales	Mycosphaerellaceae	Mycosphaerella	Mycosphaerella sp CPC 12200
New.ReferenceOTU1111	1.69898	1.05304	0.773572	1.36127	0.173428	0.494151	Ascomycota	Dothideomycetes	Capnodiales	unidentified	unidentified	Capnodiales sp
New.ReferenceOTU1657	3.46378	-0.966647	0.713237	-1.3553	0.175323	0.496153	Ascomycota	Dothideomycetes	Capnodiales	unidentified	unidentified	Capnodiales sp M_Camp7
New.ReferenceOTU572	3.74636	-1.05173	0.782835	-1.34349	0.179112	0.50345	Basidiomycota	Agaricomycetes	Agaricales	Agaricaceae	Bovista	Bovista paludosa
New.ReferenceOTU940	2.9562	1.1206	0.8446	1.32679	0.184579	0.513943	Ascomycota	Dothideomycetes	Pleosporales	Incertae sedis	Phoma	Phoma sp LF258
New.ReferenceOTU1444	1.49125	1.19575	0.90275	1.32456	0.185316	0.513943	Ascomycota	Sordariomycetes	Xylariales	Diatrypaceae	Diatrypella	Diatrypella sp
New.ReferenceOTU1346	14.7199	-0.582987	0.442067	-1.31877	0.187245	0.515853	Glomeromycota	Glomeromycetes	Glomerales	Glomeraceae	unidentified	Glomeraceae sp
New.ReferenceOTU1943	23.6646	-0.622694	0.478668	-1.30089	0.193297	0.529024	Ascomycota	unidentified	unidentified	unidentified	unidentified	Ascomycota sp
New.ReferenceOTU380	4.6505	1.16909	0.90289	1.29483	0.195378	0.531223	Ascomycota	Dothideomycetes	Pleosporales	Sporormiaceae	unidentified	Sporormiaceae sp
New.ReferenceOTU479	7.87395	-1.43611	1.11337	-1.28988	0.197093	0.532406	Ascomycota	Dothideomycetes	Pleosporales	unidentified	unidentified	Pleosporales sp
New.ReferenceOTU905	51.4499	-0.590999	0.460565	-1.2832	0.19942	0.535219	Ascomycota	Dothideomycetes	Capnodiales	Incertae sedis	Toxicocladosporium	Toxicocladosporium leucadendri
New.ReferenceOTU392	1.61484	0.707319	0.554592	1.27539	0.202173	0.539128	Ascomycota	Lecanoromycetes	unidentified	unidentified	unidentified	Lecanoromycetes sp
New.ReferenceOTU1364	95.7735	-0.244487	0.193435	-1.26392	0.206259	0.546521	Ascomycota	Dothideomycetes	Pleosporales	Pleosporaceae	Pleospora	Pleospora herbarum
New.ReferenceOTU1766	1.6972	-0.955984	0.761228	-1.25584	0.209172	0.547444	Ascomycota	unidentified	unidentified	unidentified	unidentified	uncultured Pezizomycotina
New.ReferenceOTU1735	2.8784	0.998702	0.795361	1.25566	0.209239	0.547444	Basidiomycota	Agaricomycetes	Agaricales	Psathyrellaceae	Coprinellus	Coprinellus curtus
New.ReferenceOTU2452	1.87543	1.27106	1.0338	1.2295	0.218883	0.560466	Ascomycota	Dothideomycetes	Pleosporales	unidentified	unidentified	Pleosporales sp
New.ReferenceOTU1631	4.46547	-0.793279	0.645831	-1.22831	0.219332	0.560466	Ascomycota	Sordariomycetes	Hypocreales	Nectriaceae	unidentified	Nectriaceae sp
New.ReferenceOTU492	1.36803	-1.29663	1.05322	-1.23112	0.218279	0.560466	Ascomycota	Dothideomycetes	Pleosporales	Incertae sedis	Berkleasmium	Berkleasmium sp
New.ReferenceOTU1015	11.3115	-0.456358	0.372449	-1.22529	0.220465	0.560466	Ascomycota	Dothideomycetes	Pleosporales	Incertae sedis	Periconia	Periconia sp
New.ReferenceOTU2403	2.19522	-1.38395	1.13068	-1.224	0.220953	0.560466	Ascomycota	Dothideomycetes	Dothideales	unidentified	unidentified	Dothideales sp
New.ReferenceOTU926	1.36916	-1.05091	0.870984	-1.20657	0.227596	0.564472	Ascomycota	Dothideomycetes	unidentified	unidentified	unidentified	Dothideomycetes sp
New.ReferenceOTU2482	5.6865	-1.0191	0.840246	-1.21286	0.225184	0.564472	Ascomycota	Dothideomycetes	Pleosporales	Pleosporaceae	Bipolaris	Bipolaris brizae
New.ReferenceOTU2287	9.76198	-0.885544	0.731463	-1.21065	0.22603	0.564472	Ascomycota	Sordariomycetes	Xylariales	unidentified	unidentified	Xylariales sp
New.ReferenceOTU1940	1.68867	1.10319	0.915033	1.20563	0.22796	0.564472	Ascomycota	unidentified	unidentified	unidentified	unidentified	Ascomycota sp
New.ReferenceOTU71	1.56602	1.61621	1.34491	1.20172	0.229472	0.564853	Ascomycota	Dothideomycetes	Hysteriales	Hysteriaceae	Hysterium	Hysterium pulicare
New.ReferenceOTU341	2.56686	-0.797895	0.669211	-1.19229	0.233147	0.567543	Ascomycota	Dothideomycetes	Pleosporales	Pleosporaceae	Curvularia	Curvularia alcornii
New.CleanUp.ReferenceOTU3088	2.06769	-0.760991	0.638459	-1.19192	0.233293	0.567543	Ascomycota	Dothideomycetes	Capnodiales	Davidiellaceae	Davidiella	Davidiella tassiana
New.ReferenceOTU2212	1.5142	1.30873	1.11151	1.17744	0.23902	0.578095	Ascomycota	Dothideomycetes	Capnodiales	Mycosphaerellaceae	unidentified	Mycosphaerellaceae sp
New.ReferenceOTU1079	20.776	-0.565529	0.492974	-1.14718	0.251308	0.600828	unidentified	unidentified	unidentified	unidentified	unidentified	Fungi sp
New.ReferenceOTU900	3.17678	0.598226	0.519938	1.15057	0.249909	0.600828	Ascomycota	Dothideomycetes	Pleosporales	Incertae sedis	Periconia	Periconia sp
New.ReferenceOTU932	21.9647	0.61901	0.542126	1.14182	0.253529	0.602674	Ascomycota	Dothideomycetes	Capnodiales	Capnodiaceae	Capnodium	Capnodium coffeae
New.ReferenceOTU2214	4.11046	-0.791122	0.701583	-1.12762	0.259479	0.609848	Ascomycota	Eurotiomycetes	Chaetothyriales	unidentified	unidentified	Chaetothyriales sp MSX 47445
New.ReferenceOTU1093	1.66146	-0.974437	0.861753	-1.13076	0.258155	0.609848	Ascomycota	Dothideomycetes	Pleosporales	unidentified	unidentified	Pleosporales sp
New.ReferenceOTU1685	1.80246	-0.844899	0.760074	-1.1116	0.26631	0.621886	Ascomycota	Leotiomycetes	Helotiales	Incertae sedis	Phacidiella	Phacidiella eucalypti
New.ReferenceOTU972	6.70415	-0.55526	0.500853	-1.10863	0.26759	0.621886	Ascomycota	Dothideomycetes	Capnodiales	Mycosphaerellaceae	unidentified	uncultured Mycosphaerellaceae
New.ReferenceOTU629	1.62781	1.0988	0.999146	1.09974	0.271444	0.623871	Ascomycota	Dothideomycetes	Pleosporales	unidentified	unidentified	Pleosporales sp
New.ReferenceOTU221	2.37258	-0.674591	0.611805	-1.10262	0.270191	0.623871	unidentified	unidentified	unidentified	unidentified	unidentified	fungal sp TRN499
New.ReferenceOTU2052	2.90328	-1.0171	0.928855	-1.095	0.273515	0.625176	Ascomycota	Dothideomycetes	unidentified	unidentified	unidentified	Dothideomycetes sp
New.ReferenceOTU1583	7.35081	-0.730753	0.674102	-1.08404	0.278347	0.632746	Ascomycota	Dothideomycetes	Pleosporales	Sporormiaceae	unidentified	Preussia sp BLE35
New.ReferenceOTU1608	1121.81	0.760736	0.705933	1.07763	0.281198	0.635752	Ascomycota	Leotiomycetes	Erysiphales	Erysiphaceae	Erysiphe	Erysiphe necator
New.ReferenceOTU1783	2.07289	-0.74307	0.695037	-1.06911	0.285021	0.640912	Basidiomycota	Agaricomycetes	Agaricales	unidentified	unidentified	Agaricales sp
New.ReferenceOTU1084	17.0151	-0.433713	0.411603	-1.05372	0.292013	0.653103	Ascomycota	unidentified	unidentified	unidentified	unidentified	Ascomycota sp
New.ReferenceOTU1927	17.0974	0.45309	0.432602	1.04736	0.294933	0.656108	Ascomycota	Dothideomycetes	Pleosporales	Phaeosphaeriaceae	unidentified	Phaeosphaeriaceae sp
New.ReferenceOTU1076	28.8654	0.539967	0.517665	1.04308	0.29691	0.656993	Ascomycota	Dothideomycetes	unidentified	unidentified	unidentified	Dothideomycetes sp
New.ReferenceOTU1888	11.0055	-0.402216	0.394596	-1.01931	0.308056	0.678049	Basidiomycota	Ustilaginomycetes	Ustilaginales	Ustilaginaceae	unidentified	Ustilaginaceae sp
New.ReferenceOTU577	2.24233	-0.868296	0.854753	-1.01584	0.309703	0.678087	Ascomycota	Eurotiomycetes	Eurotiales	Trichocomaceae	Penicillium	Penicillium spinulosum
New.ReferenceOTU1313	2.57831	-0.585946	0.585399	-1.00094	0.316858	0.679285	Ascomycota	unidentified	unidentified	unidentified	unidentified	uncultured Ascomycota
New.ReferenceOTU2258	7.80255	-0.421001	0.429143	-0.981027	0.326579	0.679285	Ascomycota	Dothideomycetes	Pleosporales	Lophiostomataceae	Lophiostoma	Lophiostoma arundinis
New.ReferenceOTU1328	4.8686	0.54339	0.547218	0.993004	0.320708	0.679285	Ascomycota	Dothideomycetes	Dothideales	Dothideaceae	Endoconidioma	Endoconidioma populi
New.ReferenceOTU426	3.18958	0.693335	0.706614	0.981208	0.32649	0.679285	Ascomycota	Dothideomycetes	Capnodiales	Teratosphaeriaceae	unidentified	uncultured Teratosphaeriaceae
New.ReferenceOTU503	1.45427	0.892352	0.883448	1.01008	0.312458	0.679285	Ascomycota	Dothideomycetes	Capnodiales	Mycosphaerellaceae	Ramularia	Ramularia sp
New.ReferenceOTU174	2.12412	-0.96717	0.959809	-1.00767	0.313613	0.679285	Ascomycota	unidentified	unidentified	unidentified	unidentified	ascomycete sp IZ_1147
New.ReferenceOTU514	7.32545	-0.501012	0.507712	-0.986804	0.323739	0.679285	Ascomycota	unidentified	unidentified	unidentified	unidentified	ascomycete sp IZ_962
New.ReferenceOTU1006	1.64296	1.09001	1.10808	0.983695	0.325265	0.679285	Ascomycota	Dothideomycetes	unidentified	unidentified	unidentified	Dothideomycetes sp
New.ReferenceOTU752	3.26999	0.498133	0.506878	0.982747	0.325732	0.679285	Ascomycota	unidentified	unidentified	unidentified	unidentified	Ascomycota sp
New.ReferenceOTU252	1.94929	-0.790609	0.790261	-1.00044	0.317097	0.679285	Ascomycota	Sordariomycetes	Sordariales	Chaetomiaceae	Chaetomium	Chaetomium sp
New.ReferenceOTU2308	3.00581	0.634798	0.65075	0.975488	0.329318	0.681574	Basidiomycota	Microbotryomycetes	Sporidiobolales	Incertae sedis	Rhodotorula	Rhodotorula sp DT3
New.ReferenceOTU872	9.88617	0.417456	0.430469	0.969771	0.332161	0.684054	Ascomycota	Dothideomycetes	Capnodiales	unidentified	unidentified	Capnodiales sp
New.ReferenceOTU401	20.6302	0.5537	0.580303	0.954157	0.340004	0.696757	Ascomycota	Eurotiomycetes	Chaetothyriales	Herpotrichiellaceae	unidentified	uncultured Herpotrichiellaceae
New.ReferenceOTU1056	26.9098	-0.338133	0.356691	-0.94797	0.343145	0.699746	Ascomycota	Dothideomycetes	Pleosporales	unidentified	unidentified	Pleosporales sp
New.ReferenceOTU34	38.806	-0.40566	0.429909	-0.943594	0.345377	0.700862	Ascomycota	Dothideomycetes	Capnodiales	Teratosphaeriaceae	Devriesia	Devriesia fraseriae
New.ReferenceOTU675	8.08562	0.68865	0.73467	0.93736	0.348573	0.703915	Ascomycota	Dothideomycetes	Dothideales	unidentified	unidentified	Dothideales sp
New.ReferenceOTU1202	7.17959	0.497126	0.533702	0.931467	0.351612	0.706621	unidentified	unidentified	unidentified	unidentified	unidentified	uncultured fungus
New.ReferenceOTU59	24.4618	0.327623	0.354191	0.92499	0.354971	0.709942	Ascomycota	Dothideomycetes	Capnodiales	Teratosphaeriaceae	unidentified	uncultured Teratosphaeriaceae
New.ReferenceOTU927	4.73888	-0.684752	0.74647	-0.91732	0.358975	0.711112	Ascomycota	Dothideomycetes	Pleosporales	Pleosporaceae	unidentified	Pleosporaceae sp
New.ReferenceOTU482	5.47495	0.401468	0.437093	0.918496	0.358359	0.711112	Ascomycota	Dothideomycetes	Capnodiales	unidentified	unidentified	Capnodiales sp
New.ReferenceOTU668	2.99802	-0.713446	0.782974	-0.911199	0.362191	0.714082	Ascomycota	Sordariomycetes	Xylariales	Xylariaceae	unidentified	Xylariales sp M71
New.ReferenceOTU1198	1.9983	-0.591276	0.65125	-0.907909	0.363926	0.71412	Ascomycota	Dothideomycetes	Dothideales	Dothideaceae	Endoconidioma	Endoconidioma populi
New.ReferenceOTU429	238.713	0.354711	0.396287	0.895086	0.370741	0.724076	Ascomycota	Dothideomycetes	Dothideales	Dothideaceae	Endoconidioma	Endoconidioma populi
New.ReferenceOTU1451	2.32953	-1.11606	1.25275	-0.890889	0.372989	0.725062	Ascomycota	Saccharomycetes	Saccharomycetales	Metschnikowiaceae	Metschnikowia	Metschnikowia chrysoperlae
New.ReferenceOTU2209	1.3693	-0.886697	1.002	-0.884925	0.376197	0.727898	Ascomycota	Dothideomycetes	Capnodiales	Incertae sedis	Meristemomyces	Meristemomyces frigidus
New.ReferenceOTU1002	17.3317	0.410293	0.473986	0.865624	0.386697	0.741317	Basidiomycota	Tremellomycetes	Cystofilobasidiales	Cystofilobasidiaceae	Udeniomyces	Udeniomyces pyricola
New.ReferenceOTU2092	12.9455	0.405182	0.467662	0.866398	0.386272	0.741317	Ascomycota	Dothideomycetes	Capnodiales	Incertae sedis	Arthrocatena	Arthrocatena tenebrio
New.ReferenceOTU1893	2348.66	-0.126122	0.149418	-0.844087	0.398621	0.753755	Ascomycota	Dothideomycetes	Pleosporales	Incertae sedis	Didymella	Didymella sp
New.ReferenceOTU144	16.4616	0.41219	0.487305	0.845856	0.397633	0.753755	Ascomycota	Dothideomycetes	Pleosporales	Phaeosphaeriaceae	Sclerostagonospora	Sclerostagonospora sp
New.ReferenceOTU151	7.48221	-0.333194	0.393843	-0.846007	0.397549	0.753755	Ascomycota	Dothideomycetes	Capnodiales	Davidiellaceae	Cladosporium	Cladosporium exasperatum
New.ReferenceOTU2055	2.48961	-0.523961	0.630662	-0.830811	0.406081	0.756997	Ascomycota	Eurotiomycetes	Chaetothyriales	unidentified	unidentified	Chaetothyriales sp
New.ReferenceOTU1749	6.397	-0.401665	0.488394	-0.822419	0.410839	0.756997	Ascomycota	Dothideomycetes	unidentified	unidentified	unidentified	Dothideomycetes sp
New.ReferenceOTU1368	3.10819	0.637043	0.774465	0.822559	0.410759	0.756997	Basidiomycota	Exobasidiomycetes	Microstromatales	Quambalariaceae	Quambalaria	Quambalaria cyanescens
New.ReferenceOTU1547	3.28224	-0.845498	1.00979	-0.837298	0.402425	0.756997	Ascomycota	Leotiomycetes	Helotiales	Rutstroemiaceae	Lambertella	Lambertella corni_maris
New.ReferenceOTU2168	4.68179	-0.309585	0.376766	-0.821691	0.411253	0.756997	Ascomycota	Dothideomycetes	Capnodiales	Davidiellaceae	Cladosporium	Cladosporium fusiforme
New.ReferenceOTU2180	1.92674	0.600115	0.722176	0.830982	0.405984	0.756997	Ascomycota	Lecanoromycetes	Teloschistales	Teloschistaceae	Teloschistes	Teloschistes chrysophthalmus
New.ReferenceOTU2020	2.6539	-0.447772	0.550452	-0.813462	0.415953	0.761076	Ascomycota	Dothideomycetes	Capnodiales	Davidiellaceae	Cladosporium	Cladosporium exasperatum
New.ReferenceOTU1376	2.37117	-0.793557	0.977992	-0.811414	0.417128	0.761076	unidentified	unidentified	unidentified	unidentified	unidentified	Fungi sp
New.ReferenceOTU2488	11.4956	0.439011	0.551527	0.795993	0.426036	0.76442	Basidiomycota	Tremellomycetes	Tremellales	Incertae sedis	Cryptococcus	Cryptococcus laurentii
New.ReferenceOTU1100	2.18704	0.651002	0.831481	0.782942	0.433661	0.76442	Ascomycota	Dothideomycetes	Pleosporales	unidentified	unidentified	Pleosporales sp
New.ReferenceOTU1831	47.4152	-0.551533	0.703116	-0.784412	0.432798	0.76442	Ascomycota	Dothideomycetes	Pleosporales	unidentified	unidentified	Pleosporales sp
New.ReferenceOTU1521	1.71836	0.458973	0.581626	0.789122	0.430041	0.76442	Ascomycota	Dothideomycetes	Capnodiales	Davidiellaceae	Cladosporium	Cladosporium exasperatum
New.ReferenceOTU1456	1.4372	-0.648258	0.818799	-0.791718	0.428525	0.76442	Ascomycota	unidentified	unidentified	unidentified	unidentified	uncultured Ascomycota
New.ReferenceOTU1184	1.36803	-0.659304	0.827165	-0.797064	0.425414	0.76442	Ascomycota	Eurotiomycetes	Eurotiales	Trichocomaceae	Aspergillus	Aspergillus amstelodami
New.CleanUp.ReferenceOTU3229	3.91879	0.388288	0.492503	0.788397	0.430464	0.76442	Ascomycota	Dothideomycetes	Dothideales	Dothideaceae	Endoconidioma	Endoconidioma populi
New.CleanUp.ReferenceOTU4349	126.549	-0.233232	0.290852	-0.801895	0.422614	0.76442	Ascomycota	Dothideomycetes	Capnodiales	Davidiellaceae	Davidiella	Davidiella tassiana
New.ReferenceOTU824	7.96866	-0.435112	0.561261	-0.775239	0.438198	0.769158	Basidiomycota	Agaricomycetes	Agaricales	unidentified	unidentified	Agaricales sp
New.ReferenceOTU378	5.56076	0.536334	0.69476	0.77197	0.440132	0.769306	unidentified	unidentified	unidentified	unidentified	unidentified	uncultured fungus
New.ReferenceOTU2506	3.17328	-0.477814	0.632243	-0.755744	0.449803	0.773184	Ascomycota	Dothideomycetes	Capnodiales	Incertae sedis	Toxicocladosporium	Toxicocladosporium banksiae
New.ReferenceOTU857	12.5002	-0.612628	0.816748	-0.750082	0.453205	0.773184	Ascomycota	Dothideomycetes	Dothideales	unidentified	unidentified	Dothideales sp
New.ReferenceOTU1272	3.96963	-0.399726	0.546668	-0.731205	0.464654	0.773184	Ascomycota	Dothideomycetes	Pleosporales	Pleosporaceae	unidentified	Pleosporaceae sp
New.ReferenceOTU19	1.88167	-0.681991	0.930232	-0.733141	0.463473	0.773184	Ascomycota	Dothideomycetes	Capnodiales	unidentified	unidentified	Capnodiales sp
New.ReferenceOTU1592	93.1173	-0.442784	0.605516	-0.731251	0.464626	0.773184	Ascomycota	Dothideomycetes	Pleosporales	Dothidotthiaceae	Spencermartinsia	Spencermartinsia rosulata
New.ReferenceOTU1578	18.2744	0.43679	0.575896	0.758453	0.44818	0.773184	Ascomycota	Sordariomycetes	Xylariales	Amphisphaeriaceae	Truncatella	Truncatella angustata
New.ReferenceOTU983	94.1098	-0.277616	0.379463	-0.731601	0.464412	0.773184	Ascomycota	Dothideomycetes	Pleosporales	Montagnulaceae	Paraconiothyrium	Paraconiothyrium africanum
New.ReferenceOTU1717	1.72106	-1.09608	1.47584	-0.742683	0.457674	0.773184	Ascomycota	Dothideomycetes	Pleosporales	Phaeosphaeriaceae	Phaeosphaeria	Phaeosphaeria padellana
New.ReferenceOTU1853	17.1569	0.236552	0.319127	0.741246	0.458544	0.773184	Ascomycota	Dothideomycetes	Pleosporales	Pleosporaceae	Ulocladium	Ulocladium chartarum
New.ReferenceOTU332	1.54419	0.654119	0.855901	0.764246	0.444721	0.773184	unidentified	unidentified	unidentified	unidentified	unidentified	fungal endophyte
New.ReferenceOTU1518	6.15378	-0.255959	0.341338	-0.749868	0.453334	0.773184	Ascomycota	Dothideomycetes	Capnodiales	Davidiellaceae	Cladosporium	Cladosporium exasperatum
New.CleanUp.ReferenceOTU3350	1.74717	0.684186	0.93052	0.735272	0.462174	0.773184	Ascomycota	Dothideomycetes	Pleosporales	Pleosporaceae	Ulocladium	Ulocladium chartarum
New.ReferenceOTU2019	8.21322	0.392825	0.550383	0.71373	0.475394	0.781676	Ascomycota	Dothideomycetes	Pleosporales	Leptosphaeriaceae	Coniothyrium	Coniothyrium carteri
New.ReferenceOTU2064	13.537	0.380866	0.529406	0.719421	0.471882	0.781676	Basidiomycota	Microbotryomycetes	Sporidiobolales	Incertae sedis	Sporobolomyces	Sporobolomyces gracilis
New.ReferenceOTU2387	1.49507	0.498725	0.696473	0.716072	0.473947	0.781676	Ascomycota	Dothideomycetes	Dothideales	Dothioraceae	Aureobasidium	Aureobasidium pullulans
New.ReferenceOTU2018	3.7321	-0.681883	0.964319	-0.707113	0.479496	0.785317	Ascomycota	Dothideomycetes	Pleosporales	Pleosporaceae	Pyrenophora	Pyrenophora avenae
New.ReferenceOTU2385	5.70894	-0.276408	0.401275	-0.688823	0.490935	0.800898	Ascomycota	Dothideomycetes	Pleosporales	Pleosporaceae	Alternaria	Alternaria eichhorniae
New.ReferenceOTU1970	1.74666	0.50597	0.741273	0.682569	0.494879	0.801012	Ascomycota	Sordariomycetes	unidentified	unidentified	unidentified	Sordariomycetes sp
New.ReferenceOTU1211	14.0265	-0.185609	0.272344	-0.681525	0.495539	0.801012	Ascomycota	Dothideomycetes	Pleosporales	Pleosporaceae	Ulocladium	Ulocladium chartarum
New.ReferenceOTU520	2.17256	-0.468869	0.689957	-0.679562	0.496782	0.801012	Ascomycota	unidentified	unidentified	unidentified	unidentified	Ascomycota sp
New.ReferenceOTU2290	1.43217	-0.621414	0.926087	-0.67101	0.502214	0.803543	Ascomycota	Dothideomycetes	Capnodiales	Mycosphaerellaceae	Phaeothecoidea	Phaeothecoidea minutispora
New.ReferenceOTU226	3.15028	-0.599153	0.890928	-0.672504	0.501263	0.803543	Ascomycota	Dothideomycetes	Pleosporales	unidentified	unidentified	Pleosporales sp
New.ReferenceOTU1312	1.52456	0.499188	0.74887	0.666588	0.505036	0.804961	Basidiomycota	Agaricomycetes	Boletales	Suillaceae	Suillus	Suillus pseudobrevipes
New.ReferenceOTU839	7.86632	-0.404104	0.611802	-0.660514	0.508924	0.80499	Ascomycota	Dothideomycetes	Botryosphaeriales	Botryosphaeriaceae	Diplodia	Diplodia subglobosa
New.ReferenceOTU318	1.80777	-0.472771	0.714723	-0.661475	0.508308	0.80499	Ascomycota	Sordariomycetes	Hypocreales	Nectriaceae	Fusarium	Fusarium proliferatum
New.ReferenceOTU1146	3.22508	-0.361877	0.55291	-0.654496	0.512792	0.808036	Ascomycota	Sordariomycetes	Xylariales	Amphisphaeriaceae	unidentified	Amphisphaeriaceae sp
New.ReferenceOTU2404	2.21323	-0.679283	1.04299	-0.651283	0.514864	0.808239	Ascomycota	Dothideomycetes	Dothideales	Dothioraceae	Aureobasidium	Aureobasidium pullulans
New.ReferenceOTU948	1.67363	0.498554	0.783624	0.636216	0.524636	0.809484	Ascomycota	Lecanoromycetes	Ostropales	Stictidaceae	Ostropa	Ostropa barbara
New.ReferenceOTU1890	5.12835	0.301965	0.491836	0.613955	0.539245	0.809484	Ascomycota	Dothideomycetes	Pleosporales	Sporormiaceae	unidentified	Sporormiaceae sp
New.ReferenceOTU1418	14.5322	-0.345357	0.551594	-0.626108	0.531244	0.809484	Ascomycota	Eurotiomycetes	Chaetothyriales	Herpotrichiellaceae	Phaeococcomyces	Phaeococcomyces aff nigricans P40D010
New.ReferenceOTU218	20.6442	-0.237692	0.38934	-0.610501	0.54153	0.809484	Ascomycota	Sordariomycetes	unidentified	unidentified	unidentified	Sordariomycetes sp
New.ReferenceOTU770	3.06025	0.543992	0.879237	0.618709	0.536108	0.809484	Ascomycota	Sordariomycetes	Sordariales	Lasiosphaeriaceae	unidentified	Lasiosphaeriaceae sp
New.ReferenceOTU1105	3.79805	0.598043	0.982922	0.608434	0.542899	0.809484	unidentified	unidentified	unidentified	unidentified	unidentified	uncultured fungus
New.ReferenceOTU2040	1.4911	-0.583331	0.91716	-0.636018	0.524765	0.809484	Ascomycota	Dothideomycetes	Capnodiales	unidentified	unidentified	Capnodiales sp
New.ReferenceOTU2049	118.598	0.212078	0.329866	0.642921	0.520275	0.809484	Ascomycota	Dothideomycetes	Capnodiales	Davidiellaceae	Cladosporium	Cladosporium sphaerospermum
New.ReferenceOTU698	9.31321	-0.292674	0.474486	-0.616822	0.537352	0.809484	Ascomycota	Dothideomycetes	Patellariales	Patellariaceae	Rhytidhysteron	Rhytidhysteron sp
New.ReferenceOTU1941	480.259	-0.177079	0.28731	-0.616336	0.537673	0.809484	Basidiomycota	unidentified	unidentified	unidentified	unidentified	Basidiomycota sp
New.ReferenceOTU1539	1.57396	0.621166	0.971997	0.639062	0.522783	0.809484	unidentified	unidentified	unidentified	unidentified	unidentified	uncultured fungus
New.ReferenceOTU1504	3.88896	0.464694	0.743934	0.624644	0.532205	0.809484	Ascomycota	Sordariomycetes	Hypocreales	Hypocreaceae	unidentified	Hypocreaceae sp
New.ReferenceOTU460	3.96616	-0.297195	0.472414	-0.629099	0.529284	0.809484	Ascomycota	Sordariomycetes	Hypocreales	Incertae sedis	Sarocladium	Sarocladium zeae
New.CleanUp.ReferenceOTU4624	1.76073	-0.478423	0.755515	-0.633242	0.526576	0.809484	Ascomycota	Dothideomycetes	Pleosporales	Montagnulaceae	Paraconiothyrium	Paraconiothyrium hawaiiense
New.ReferenceOTU2042	1.32238	-0.527497	0.875484	-0.602521	0.546828	0.812321	Basidiomycota	Tremellomycetes	Tremellales	Incertae sedis	Cryptococcus	Cryptococcus phenolicus
New.ReferenceOTU786	5.65694	-0.397289	0.66573	-0.596772	0.55066	0.812321	unidentified	unidentified	unidentified	unidentified	unidentified	uncultured fungus
New.ReferenceOTU2397	1.71453	-0.417705	0.697495	-0.598864	0.549263	0.812321	Ascomycota	unidentified	unidentified	unidentified	unidentified	uncultured Ascomycota
New.ReferenceOTU203	93.5523	0.273527	0.462299	0.591668	0.554073	0.814467	Basidiomycota	Microbotryomycetes	Sporidiobolales	Incertae sedis	Sporobolomyces	Sporobolomyces sp JCM 11360
New.ReferenceOTU2358	7.10085	-0.40271	0.697776	-0.577134	0.563849	0.817394	Ascomycota	Sordariomycetes	Xylariales	Xylariaceae	Barrmaelia	Barrmaelia macrospora
New.ReferenceOTU1208	1.87664	0.494326	0.859875	0.574881	0.565372	0.817394	unidentified	unidentified	unidentified	unidentified	unidentified	fungal sp ARIZ AZ1110
New.ReferenceOTU1771	6.87305	0.519096	0.897136	0.578615	0.562849	0.817394	Ascomycota	unidentified	unidentified	unidentified	unidentified	uncultured Ascomycota
New.ReferenceOTU656	19.3632	-0.312954	0.545104	-0.574117	0.565888	0.817394	Ascomycota	Dothideomycetes	unidentified	unidentified	unidentified	Dothideomycetes sp
New.ReferenceOTU1874	2.50556	-0.294308	0.50307	-0.585023	0.558532	0.817394	Ascomycota	Dothideomycetes	Dothideales	Dothideaceae	Endoconidioma	Endoconidioma populi
New.ReferenceOTU1785	2.54452	0.394182	0.710579	0.554733	0.579077	0.827822	Ascomycota	Sordariomycetes	Xylariales	unidentified	unidentified	Xylariales sp
New.ReferenceOTU710	2.20484	-0.458998	0.821159	-0.558963	0.576187	0.827822	Ascomycota	Dothideomycetes	Capnodiales	unidentified	unidentified	Capnodiales sp M_Camp7
New.ReferenceOTU2162	2.41201	-0.426153	0.768174	-0.554761	0.579058	0.827822	unidentified	unidentified	unidentified	unidentified	unidentified	Fungi sp
New.ReferenceOTU854	10.4972	0.277526	0.5038	0.550866	0.581726	0.82876	Ascomycota	Dothideomycetes	Dothideales	Dothioraceae	Hormonema	Hormonema sp F_054,258
New.ReferenceOTU1964	2.47242	0.305724	0.565443	0.54068	0.588728	0.835873	Ascomycota	Dothideomycetes	Dothideales	Dothideaceae	Endoconidioma	Endoconidioma populi
New.ReferenceOTU856	2.10541	-0.392271	0.747767	-0.52459	0.599868	0.84418	Ascomycota	unidentified	unidentified	unidentified	unidentified	Ascomycota sp
New.ReferenceOTU1919	2.14192	-0.452128	0.868596	-0.520527	0.602696	0.84418	Ascomycota	Dothideomycetes	Pleosporales	Cucurbitariaceae	Pyrenochaetopsis	Pyrenochaetopsis microspora
New.ReferenceOTU1290	12.2925	0.170241	0.327042	0.520548	0.602682	0.84418	Ascomycota	Dothideomycetes	Capnodiales	Davidiellaceae	Cladosporium	Cladosporium exasperatum
New.CleanUp.ReferenceOTU1476	1.62942	0.72366	1.38044	0.524225	0.600122	0.84418	Ascomycota	Dothideomycetes	Pleosporales	Pleosporaceae	Alternaria	Alternaria solani
New.ReferenceOTU354	1.31324	0.54324	1.06734	0.508966	0.610776	0.852513	Ascomycota	Dothideomycetes	Pleosporales	Leptosphaeriaceae	Leptosphaeria	Leptosphaeria sp
New.ReferenceOTU1854	5.81283	0.307172	0.610384	0.503243	0.614793	0.852513	Basidiomycota	Microbotryomycetes	Sporidiobolales	Incertae sedis	Rhodotorula	Rhodotorula aurantiaca
New.ReferenceOTU1984	2.88751	-0.263707	0.522615	-0.504591	0.613846	0.852513	Ascomycota	Dothideomycetes	Pleosporales	unidentified	unidentified	Pleosporales sp
New.ReferenceOTU1303	6.62868	-0.196171	0.399088	-0.491549	0.623038	0.853348	Ascomycota	Dothideomycetes	Capnodiales	Mycosphaerellaceae	Mycosphaerella	Mycosphaerella pseudocryptica
New.ReferenceOTU2307	2.56117	0.373585	0.761247	0.490754	0.623601	0.853348	Ascomycota	Dothideomycetes	Pleosporales	Pleosporaceae	Embellisia	Embellisia planifunda
New.ReferenceOTU1951	3.16809	-0.411848	0.835083	-0.493182	0.621884	0.853348	Ascomycota	Dothideomycetes	Pleosporales	Pleosporaceae	Pyrenophora	Pyrenophora lolii
New.ReferenceOTU227	2.14677	-0.300738	0.602767	-0.498929	0.617829	0.853348	Ascomycota	Dothideomycetes	Capnodiales	Mycosphaerellaceae	unidentified	Mycosphaerellaceae sp
New.ReferenceOTU733	3.22929	-0.377459	0.77844	-0.484891	0.627753	0.853416	Ascomycota	Dothideomycetes	Capnodiales	unidentified	unidentified	Capnodiales sp
New.ReferenceOTU569	2.38313	-0.367116	0.752978	-0.487553	0.625867	0.853416	Ascomycota	Lecanoromycetes	Baeomycetales	Baeomycetaceae	Ainoa	Ainoa geochroa
New.ReferenceOTU2333	1.64191	0.456918	0.952028	0.479942	0.631269	0.8554	Ascomycota	Dothideomycetes	Pleosporales	Cucurbitariaceae	Curreya	Curreya austroafricana
New.ReferenceOTU2196	6.89009	-0.264803	0.561291	-0.471775	0.637087	0.85923	Ascomycota	Dothideomycetes	Pleosporales	Pleosporaceae	unidentified	Pleosporaceae sp
New.ReferenceOTU1163	1.38635	0.31829	0.676952	0.470181	0.638226	0.85923	Ascomycota	Dothideomycetes	Pleosporales	Pleosporaceae	Pleospora	Pleospora herbarum
New.ReferenceOTU1429	3.26375	0.23815	0.51854	0.45927	0.646041	0.861387	Basidiomycota	Agaricomycetes	Polyporales	Ganodermataceae	Ganoderma	Ganoderma resinaceum
New.ReferenceOTU1215	1.70354	0.3966	0.862604	0.45977	0.645681	0.861387	Ascomycota	Dothideomycetes	Capnodiales	Mycosphaerellaceae	Phaeothecoidea	Phaeothecoidea sp NO235a
New.ReferenceOTU481	2.1932	-0.526479	1.142	-0.461016	0.644787	0.861387	Ascomycota	Dothideomycetes	Dothideales	Dothideaceae	Endoconidioma	Endoconidioma populi
New.ReferenceOTU2423	3.5091	-0.205949	0.4576	-0.450062	0.652665	0.86744	Ascomycota	Dothideomycetes	Pleosporales	Pleosporaceae	Ulocladium	Ulocladium chartarum
New.ReferenceOTU1829	1.58676	0.394724	0.897283	0.43991	0.660002	0.874398	Ascomycota	Sordariomycetes	Diaporthales	Incertae sedis	Valsaria	Valsaria ceratoniae
New.ReferenceOTU1194	6.47124	-0.198752	0.457451	-0.434477	0.663942	0.876825	Basidiomycota	Ustilaginomycetes	Ustilaginales	Ustilaginaceae	Ustilago	Ustilago maydis
New.ReferenceOTU2143	8.65066	-0.170699	0.399285	-0.427512	0.669007	0.87878	Ascomycota	Dothideomycetes	Dothideales	Dothideaceae	Endoconidioma	Endoconidioma populi
New.ReferenceOTU2447	1.99501	0.282211	0.661486	0.426632	0.669647	0.87878	Ascomycota	Dothideomycetes	unidentified	unidentified	unidentified	Dothideomycetes sp
New.ReferenceOTU1847	169.711	0.250056	0.595879	0.419643	0.674746	0.882687	Ascomycota	Dothideomycetes	Pleosporales	Sporormiaceae	unidentified	Sporormiaceae sp
New.ReferenceOTU394	8.16358	0.200037	0.484649	0.412746	0.679793	0.886501	Ascomycota	Dothideomycetes	Capnodiales	Teratosphaeriaceae	Teratosphaeria	Teratosphaeria knoxdavesii
New.ReferenceOTU1438	14405.7	-0.106912	0.261944	-0.408149	0.683165	0.888114	Ascomycota	Dothideomycetes	Capnodiales	Davidiellaceae	Cladosporium	Cladosporium exasperatum
New.ReferenceOTU295	39.4772	0.129717	0.324857	0.399306	0.689668	0.893775	Ascomycota	Dothideomycetes	Capnodiales	unidentified	unidentified	Capnodiales sp
SH199058.07FU_JX981477_reps	2.04179	0.263832	0.68069	0.387595	0.698316	0.896504	Ascomycota	Dothideomycetes	Pleosporales	unidentified	unidentified	Pleosporales sp
New.ReferenceOTU2126	7.87008	-0.12761	0.325634	-0.391881	0.695146	0.896504	Ascomycota	Dothideomycetes	Pleosporales	Incertae sedis	Didymella	Didymella sp
New.ReferenceOTU1366	28.4376	0.167236	0.434618	0.384789	0.700394	0.896504	Ascomycota	Sordariomycetes	Hypocreales	Nectriaceae	Fusarium	Fusarium sp
New.ReferenceOTU1164	4.72268	0.265893	0.688948	0.385941	0.699541	0.896504	Ascomycota	Sordariomycetes	Incertae sedis	Incertae sedis	Cryptovalsa	Cryptovalsa rabenhorstii
New.ReferenceOTU1950	2.69179	-0.465215	1.24243	-0.374441	0.708077	0.903558	Ascomycota	Dothideomycetes	unidentified	unidentified	unidentified	Dothideomycetes sp
New.ReferenceOTU1424	38.8824	-0.138956	0.378036	-0.367574	0.713191	0.907301	Ascomycota	Dothideomycetes	Botryosphaeriales	Botryosphaeriaceae	Dothiorella	Dothiorella vidmadera
New.ReferenceOTU1089	1.63615	0.257425	0.722978	0.356062	0.721794	0.912773	unidentified	unidentified	unidentified	unidentified	unidentified	fungal sp P1S14
New.ReferenceOTU1398	2.85598	0.276913	0.777962	0.355947	0.72188	0.912773	unidentified	unidentified	unidentified	unidentified	unidentified	uncultured fungus
New.ReferenceOTU928	1.94848	0.276557	0.801209	0.345175	0.729963	0.917416	Ascomycota	Dothideomycetes	Capnodiales	Teratosphaeriaceae	unidentified	Teratosphaeriaceae sp
New.ReferenceOTU633	10.6489	0.16326	0.469319	0.347866	0.727941	0.917416	Ascomycota	Dothideomycetes	Dothideales	Dothideaceae	Endoconidioma	Endoconidioma populi
New.ReferenceOTU913	4.13056	-0.199577	0.65941	-0.30266	0.762149	0.91837	Ascomycota	Dothideomycetes	Capnodiales	Incertae sedis	Rachicladosporium	Rachicladosporium americanum
New.ReferenceOTU2329	2.94295	0.261726	0.770941	0.339489	0.734241	0.91837	Ascomycota	Eurotiomycetes	Eurotiales	Trichocomaceae	Penicillium	Penicillium sp HK80
New.ReferenceOTU1799	8.59656	-0.141966	0.455877	-0.311412	0.755487	0.91837	unidentified	unidentified	unidentified	unidentified	unidentified	fungal sp TRN256
New.ReferenceOTU1279	11.5279	-0.143064	0.47378	-0.301963	0.76268	0.91837	Ascomycota	Sordariomycetes	Incertae sedis	Incertae sedis	Cryptovalsa	Cryptovalsa ampelina
New.ReferenceOTU2200	2.15302	-0.254536	0.771997	-0.329711	0.741618	0.91837	Ascomycota	Sordariomycetes	unidentified	unidentified	unidentified	Sordariomycetes sp MX17
New.ReferenceOTU707	3.61795	-0.191233	0.615323	-0.310785	0.755964	0.91837	Ascomycota	Dothideomycetes	unidentified	unidentified	unidentified	Dothideomycetes sp
New.ReferenceOTU388	1.51583	-0.525997	1.61132	-0.326439	0.744092	0.91837	unidentified	unidentified	unidentified	unidentified	unidentified	uncultured fungus
New.ReferenceOTU1778	12.9493	-0.127659	0.395515	-0.322765	0.746873	0.91837	Basidiomycota	Exobasidiomycetes	Tilletiales	Tilletiaceae	Tilletia	Tilletia controversa
New.ReferenceOTU2459	1.37621	-0.281501	0.893297	-0.315126	0.752666	0.91837	Ascomycota	Dothideomycetes	Pleosporales	Sporormiaceae	Preussia	Preussia flanaganii
New.ReferenceOTU1149	512.767	-0.0602898	0.182001	-0.33126	0.740448	0.91837	Ascomycota	Dothideomycetes	Pleosporales	unidentified	unidentified	Pleosporales sp
New.ReferenceOTU769	8.67933	0.191279	0.625885	0.305614	0.759898	0.91837	Ascomycota	Lecanoromycetes	Ostropales	Stictidaceae	Glomerobolus	Glomerobolus gelineus
New.ReferenceOTU337	1.52744	-0.236335	0.761439	-0.310379	0.756273	0.91837	unidentified	unidentified	unidentified	unidentified	unidentified	uncultured fungus
New.ReferenceOTU1455	1.62306	0.259871	0.804845	0.322884	0.746783	0.91837	Ascomycota	Lecanoromycetes	Ostropales	Stictidaceae	unidentified	Stictidaceae sp
New.ReferenceOTU2421	10.0613	0.151579	0.504513	0.300447	0.763836	0.91837	Ascomycota	Dothideomycetes	Capnodiales	Teratosphaeriaceae	unidentified	Teratosphaeriaceae sp
New.ReferenceOTU1471	12.9164	-0.117274	0.377185	-0.310918	0.755863	0.91837	Basidiomycota	Tremellomycetes	Tremellales	Incertae sedis	Cryptococcus	Cryptococcus sp
New.ReferenceOTU711	36.3986	-0.125522	0.432363	-0.290316	0.771575	0.925	Ascomycota	Sordariomycetes	Xylariales	Amphisphaeriaceae	Pestalotiopsis	Pestalotiopsis sp HC02
New.ReferenceOTU869	3.76873	-0.166219	0.601082	-0.276532	0.782139	0.934971	Ascomycota	Eurotiomycetes	Chaetothyriales	Herpotrichiellaceae	Phaeomoniella	Phaeomoniella niveniae
New.ReferenceOTU844	7.00767	0.101203	0.38265	0.264479	0.791411	0.942656	Glomeromycota	Glomeromycetes	Glomerales	Glomeraceae	unidentified	Glomeraceae sp
New.ReferenceOTU1772	9.84226	-0.0899425	0.342916	-0.262287	0.7931	0.942656	Ascomycota	Dothideomycetes	Capnodiales	Davidiellaceae	Cladosporium	Cladosporium exasperatum
New.ReferenceOTU457	2.68763	0.160211	0.651517	0.245905	0.805756	0.945122	Ascomycota	Dothideomycetes	Pleosporales	Pleosporaceae	Pleospora	Pleospora herbarum
New.ReferenceOTU448	230.249	-0.0735406	0.347358	-0.211714	0.83233	0.945122	Basidiomycota	Ustilaginomycetes	Ustilaginales	Ustilaginaceae	Ustilago	Ustilago maydis
New.ReferenceOTU281	2.28938	0.161204	0.789236	0.204253	0.838156	0.945122	Ascomycota	Dothideomycetes	Dothideales	Dothideaceae	Dothidea	Dothidea insculpta
New.ReferenceOTU945	6.55337	-0.117055	0.512398	-0.228445	0.8193	0.945122	Basidiomycota	Ustilaginomycetes	Ustilaginales	Ustilaginaceae	Ustilago	Ustilago filiformis
New.ReferenceOTU1655	1.43329	-0.186587	0.832967	-0.224003	0.822755	0.945122	Basidiomycota	Agaricomycetes	Agaricales	Psathyrellaceae	Coprinopsis	Coprinopsis atramentaria
New.ReferenceOTU1354	1.43493	-0.16763	0.85708	-0.195582	0.844937	0.945122	unidentified	unidentified	unidentified	unidentified	unidentified	fungal sp P1S14
New.ReferenceOTU567	2.64421	-0.207367	0.885905	-0.234073	0.814928	0.945122	Ascomycota	Dothideomycetes	Pleosporales	unidentified	unidentified	Pleosporales sp
New.ReferenceOTU298	1.78243	0.193741	0.889127	0.217901	0.827507	0.945122	Ascomycota	Dothideomycetes	unidentified	unidentified	unidentified	Dothideomycetes sp
New.ReferenceOTU1348	1.43595	0.161416	0.806202	0.200218	0.84131	0.945122	Basidiomycota	Tremellomycetes	Tremellales	Incertae sedis	Cryptococcus	Cryptococcus heimaeyensis
New.ReferenceOTU1752	3.60171	-0.150518	0.608171	-0.247492	0.804527	0.945122	Ascomycota	Dothideomycetes	Pleosporales	Pleosporaceae	Lewia	Lewia infectoria
New.ReferenceOTU3	2.58055	-0.151181	0.632738	-0.238932	0.811159	0.945122	Ascomycota	unidentified	unidentified	unidentified	unidentified	uncultured Ascomycota
New.ReferenceOTU1962	1.70614	0.12993	0.675312	0.192399	0.847429	0.945122	Basidiomycota	Agaricostilbomycetes	unidentified	unidentified	unidentified	Agaricostilbomycetes sp
New.ReferenceOTU1107	2.39182	0.162943	0.788465	0.206659	0.836277	0.945122	unidentified	unidentified	unidentified	unidentified	unidentified	uncultured fungus
New.ReferenceOTU237	2.23807	-0.173274	0.771897	-0.224478	0.822385	0.945122	Ascomycota	Dothideomycetes	Pleosporales	Incertae sedis	Periconia	Periconia sp CY191
New.ReferenceOTU1540	2.08849	-0.165074	0.846662	-0.194971	0.845416	0.945122	Ascomycota	Sordariomycetes	Trichosphaeriales	Incertae sedis	unidentified	Trichosphaeriales sp
New.ReferenceOTU2158	16.933	-0.0585983	0.301776	-0.194178	0.846036	0.945122	Ascomycota	Dothideomycetes	Capnodiales	Davidiellaceae	Cladosporium	Cladosporium exasperatum
New.ReferenceOTU2098	6.77918	0.0983145	0.480265	0.204709	0.8378	0.945122	Ascomycota	Dothideomycetes	Capnodiales	Davidiellaceae	Cladosporium	Cladosporium fusiforme
New.ReferenceOTU2091	2.21525	0.176827	0.772091	0.229023	0.818851	0.945122	Ascomycota	unidentified	unidentified	unidentified	unidentified	uncultured Ascomycota
New.ReferenceOTU1527	1.71678	-0.165462	0.75568	-0.218958	0.826683	0.945122	Ascomycota	unidentified	unidentified	unidentified	unidentified	Ascomycota sp
New.ReferenceOTU493	1.63885	-0.275096	1.15385	-0.238415	0.811559	0.945122	unidentified	unidentified	unidentified	unidentified	unidentified	Fungi sp
New.ReferenceOTU470	1.8345	0.167553	0.720061	0.232693	0.815999	0.945122	Basidiomycota	unidentified	unidentified	unidentified	unidentified	Basidiomycota sp
New.ReferenceOTU485	2.20098	0.136924	0.659345	0.207667	0.835489	0.945122	unidentified	unidentified	unidentified	unidentified	unidentified	uncultured fungus
New.CleanUp.ReferenceOTU3982	2.06301	-0.134657	0.572603	-0.235166	0.81408	0.945122	Ascomycota	Dothideomycetes	Capnodiales	Davidiellaceae	Davidiella	Davidiella tassiana
New.ReferenceOTU497	5.74039	0.115914	0.654544	0.177091	0.859437	0.945836	Ascomycota	Dothideomycetes	Pleosporales	Pleosporaceae	Stemphylium	Stemphylium loti
New.ReferenceOTU2530	3.66534	-0.0981528	0.548587	-0.178919	0.858001	0.945836	Ascomycota	Dothideomycetes	Capnodiales	Mycosphaerellaceae	unidentified	uncultured Mycosphaerellaceae
New.ReferenceOTU2491	2.79242	-0.124409	0.672546	-0.184982	0.853243	0.945836	Ascomycota	Dothideomycetes	Pleosporales	Pleosporaceae	unidentified	Pleosporaceae sp
New.ReferenceOTU1722	3.10896	-0.137406	0.775382	-0.177211	0.859343	0.945836	unidentified	unidentified	unidentified	unidentified	unidentified	uncultured fungus
New.ReferenceOTU1616	40.3831	0.0702473	0.378841	0.185427	0.852894	0.945836	Ascomycota	Dothideomycetes	Capnodiales	Incertae sedis	Rachicladosporium	Rachicladosporium sp DoF1
New.ReferenceOTU2503	65.23	-0.0728055	0.428277	-0.169996	0.865013	0.947353	Ascomycota	Dothideomycetes	Dothideales	Dothioraceae	unidentified	Dothioraceae sp
New.ReferenceOTU2323	3.4347	-0.15062	0.919796	-0.163754	0.869925	0.947353	unidentified	unidentified	unidentified	unidentified	unidentified	Fungi sp
New.ReferenceOTU1796	3.56364	-0.13934	0.826565	-0.168577	0.866129	0.947353	Ascomycota	Dothideomycetes	Pleosporales	Sporormiaceae	unidentified	Sporormiaceae sp
New.ReferenceOTU1155	5.50287	0.0922969	0.554019	0.166595	0.867689	0.947353	Basidiomycota	Microbotryomycetes	Sporidiobolales	Incertae sedis	Rhodotorula	Rhodotorula armeniaca
New.ReferenceOTU2202	2.43045	-0.101035	0.651638	-0.155047	0.876784	0.947382	Ascomycota	Eurotiomycetes	Chaetothyriales	unidentified	unidentified	Chaetothyriales sp
New.ReferenceOTU2068	7.94818	-0.0709515	0.45456	-0.156088	0.875963	0.947382	Basidiomycota	Agaricomycetes	Agaricales	unidentified	unidentified	Agaricales sp
New.ReferenceOTU2369	2.19414	0.131868	0.839563	0.157068	0.875191	0.947382	unidentified	unidentified	unidentified	unidentified	unidentified	uncultured fungus
New.ReferenceOTU411	3.3661	-0.11955	0.86276	-0.138567	0.889792	0.954052	Ascomycota	Dothideomycetes	Pleosporales	Pleosporaceae	Curvularia	Curvularia spicifera
New.ReferenceOTU1920	4.10228	-0.0765625	0.552754	-0.138511	0.889837	0.954052	Basidiomycota	Agaricomycetes	Agaricales	Psathyrellaceae	Coprinellus	Coprinellus eurysporus
New.ReferenceOTU1137	1.70052	-0.111705	0.783904	-0.142498	0.886687	0.954052	Ascomycota	Dothideomycetes	Pleosporales	Incertae sedis	Phoma	Phoma sp
New.ReferenceOTU2204	1.52243	0.145065	1.08207	0.134063	0.893353	0.954507	Ascomycota	Leotiomycetes	Helotiales	Helotiaceae	unidentified	Helotiaceae sp
New.ReferenceOTU2278	3.17118	0.0702564	0.531563	0.132169	0.89485	0.954507	Basidiomycota	unidentified	unidentified	unidentified	unidentified	Basidiomycota sp
New.ReferenceOTU1286	3.71839	0.0745777	0.605165	0.123235	0.901921	0.959588	Ascomycota	Dothideomycetes	Pleosporales	Montagnulaceae	Paraphaeosphaeria	Paraphaeosphaeria michotii
New.ReferenceOTU297	5.36455	0.059604	0.620338	0.0960832	0.923454	0.960393	Ascomycota	Dothideomycetes	Pleosporales	Incertae sedis	Phoma	Phoma puncteliae
New.ReferenceOTU1091	374.239	-0.0309617	0.305194	-0.101449	0.919194	0.960393	Ascomycota	Dothideomycetes	Dothideales	Dothideaceae	Endoconidioma	Endoconidioma populi
New.ReferenceOTU728	1.53789	0.109243	1.05913	0.103144	0.917848	0.960393	Ascomycota	Dothideomycetes	Pleosporales	Massarinaceae	unidentified	uncultured Saccharicola
New.ReferenceOTU1254	10.4714	0.0713627	0.729592	0.0978117	0.922082	0.960393	Ascomycota	Dothideomycetes	Pleosporales	Sporormiaceae	unidentified	Sporormiaceae sp
New.ReferenceOTU1253	2.22264	-0.0928382	0.813548	-0.114115	0.909146	0.960393	Ascomycota	Sordariomycetes	Lulworthiales	Lulworthiaceae	Zalerion	Zalerion arboricola
New.ReferenceOTU1803	5.73646	-0.0460277	0.441359	-0.104286	0.916942	0.960393	Ascomycota	Dothideomycetes	Pleosporales	Montagnulaceae	Paraconiothyrium	Paraconiothyrium hawaiiense
New.ReferenceOTU2479	5.15459	0.054934	0.515463	0.106572	0.915128	0.960393	Ascomycota	Dothideomycetes	Dothideales	Dothioraceae	Sydowia	Sydowia sp
New.ReferenceOTU744	8.22114	-0.0543103	0.562929	-0.096478	0.923141	0.960393	Ascomycota	Dothideomycetes	Pleosporales	unidentified	unidentified	Pleosporales sp
New.ReferenceOTU348	140.336	0.025004	0.234918	0.106437	0.915236	0.960393	Ascomycota	Dothideomycetes	Pleosporales	Pleosporaceae	Chalastospora	Chalastospora ellipsoidea
New.ReferenceOTU2326	1.31787	0.0890078	0.993843	0.0895592	0.928638	0.963375	Ascomycota	Sordariomycetes	unidentified	unidentified	unidentified	Sordariomycetes sp
New.CleanUp.ReferenceOTU1167	1.33858	-0.0493618	0.589989	-0.0836656	0.933322	0.965826	Ascomycota	Dothideomycetes	Capnodiales	Davidiellaceae	Cladosporium	Cladosporium exasperatum
New.ReferenceOTU1112	1.50587	0.0568166	0.844162	0.0673053	0.946339	0.969996	unidentified	unidentified	unidentified	unidentified	unidentified	Fungi sp
New.ReferenceOTU1160	3.68082	-0.0455313	0.650293	-0.0700165	0.94418	0.969996	Ascomycota	Eurotiomycetes	Chaetothyriales	Herpotrichiellaceae	Phaeococcomyces	Phaeococcomyces mexicanus
New.ReferenceOTU74	2.32471	0.0357645	0.494883	0.0722687	0.942388	0.969996	Ascomycota	Dothideomycetes	Pleosporales	Pleosporaceae	Ulocladium	Ulocladium chartarum
New.ReferenceOTU2414	2.41131	-0.0477903	0.714589	-0.066878	0.946679	0.969996	Ascomycota	Dothideomycetes	Pleosporales	Pleosporaceae	Bipolaris	Bipolaris cynodontis
New.ReferenceOTU2030	1.39885	-0.0322295	0.620908	-0.051907	0.958603	0.972818	Ascomycota	Dothideomycetes	unidentified	unidentified	unidentified	Dothideomycetes sp
New.ReferenceOTU2023	1.40976	-0.0367897	0.711934	-0.0516757	0.958787	0.972818	Ascomycota	Incertae sedis	Incertae sedis	Incertae sedis	Torula	Torula sp
New.ReferenceOTU2114	1.74729	-0.0610742	1.03158	-0.0592044	0.952789	0.972818	Ascomycota	Dothideomycetes	Pleosporales	unidentified	unidentified	Pleosporales sp
New.ReferenceOTU690	3.53829	-0.0413451	0.724148	-0.0570948	0.95447	0.972818	Ascomycota	Sordariomycetes	Sordariales	Chaetomiaceae	Humicola	Humicola grisea var. grisea
New.ReferenceOTU1319	1.51681	-0.0331172	0.716746	-0.0462049	0.963147	0.974864	Ascomycota	Dothideomycetes	Capnodiales	unidentified	unidentified	Capnodiales sp
New.ReferenceOTU202	1.37308	-0.0293004	0.835382	-0.0350742	0.972021	0.981458	Ascomycota	Dothideomycetes	Pleosporales	Phaeosphaeriaceae	Phaeosphaeria	Phaeosphaeria triglochinicola
New.ReferenceOTU1358	41.3612	0.00320939	0.2022	0.0158723	0.987336	0.994508	Ascomycota	Dothideomycetes	Capnodiales	Davidiellaceae	Davidiella	Davidiella tassiana
New.ReferenceOTU2296	1.34948	-0.00918917	0.904389	-0.0101606	0.991893	0.996685	Ascomycota	Eurotiomycetes	Eurotiales	Trichocomaceae	Aspergillus	Aspergillus tubingensis
New.ReferenceOTU1380	11.3435	-0.00554196	0.804133	-0.00689185	0.994501	0.996898	Ascomycota	unidentified	unidentified	unidentified	unidentified	Ascomycota sp
New.ReferenceOTU1050	257.841	-0.000554279	0.389631	-0.00142258	0.998865	0.998865	Ascomycota	Dothideomycetes	Dothideales	Dothideaceae	Endoconidioma	Endoconidioma populi
New.ReferenceOTU917	0	NA	NA	NA	NA	NA	Ascomycota	Dothideomycetes	Incertae sedis	Micropeltidaceae	Stomiopeltis	Stomiopeltis sp T36A1b
New.ReferenceOTU918	0.0163294	0.0814133	2.96442	0.0274634	0.97809	NA	Ascomycota	Dothideomycetes	Capnodiales	Mycosphaerellaceae	Xenosonderhenia	Xenosonderhenia syzygii
New.ReferenceOTU2194	0.702188	0.912946	1.65499	0.551633	0.5812	NA	Ascomycota	Dothideomycetes	Incertae sedis	Incertae sedis	Asteromella	Asteromella sp
New.ReferenceOTU2191	0.76461	-0.729389	1.20903	-0.603285	0.546319	NA	unidentified	unidentified	unidentified	unidentified	unidentified	uncultured fungus
New.ReferenceOTU1124	1.26032	0.949728	0.80568	1.17879	0.238481	NA	Ascomycota	Eurotiomycetes	Chaetothyriales	Herpotrichiellaceae	Capronia	Capronia sp 94006a
New.ReferenceOTU2352	0.620022	-2.18673	1.44972	-1.50838	0.131457	NA	Ascomycota	Dothideomycetes	Pleosporales	Incertae sedis	Phoma	Phoma sp A15
New.ReferenceOTU1889	0.358494	1.62663	2.27932	0.713647	0.475445	NA	Ascomycota	Dothideomycetes	Capnodiales	Teratosphaeriaceae	unidentified	uncultured Teratosphaeriaceae
New.ReferenceOTU1884	0.944973	1.41877	1.77916	0.797436	0.425198	NA	Basidiomycota	Agaricomycetes	Agaricales	unidentified	unidentified	Agaricales sp
New.ReferenceOTU1886	0.356298	-0.938947	1.68625	-0.556826	0.577646	NA	Ascomycota	Dothideomycetes	Capnodiales	Davidiellaceae	Davidiella	Davidiella tassiana
New.ReferenceOTU1269	1.06036	0.307242	0.86549	0.354992	0.722595	NA	Ascomycota	Dothideomycetes	Capnodiales	Davidiellaceae	Cladosporium	Cladosporium exasperatum
New.ReferenceOTU1267	0.334033	-0.0453489	1.5711	-0.0288644	0.976973	NA	Ascomycota	Eurotiomycetes	Chaetothyriales	unidentified	unidentified	Chaetothyriales sp
New.ReferenceOTU1066	0.644277	-2.21273	1.56607	-1.41292	0.157679	NA	Basidiomycota	Agaricomycetes	Agaricales	Agaricaceae	Bovista	Bovista promontorii
New.ReferenceOTU1064	0.507593	-1.29532	1.90306	-0.680649	0.496094	NA	Ascomycota	Lecanoromycetes	unidentified	unidentified	unidentified	Lecanoromycetes sp
New.ReferenceOTU1063	1.11735	-0.0217794	0.79335	-0.0274524	0.978099	NA	Basidiomycota	Tremellomycetes	Tremellales	Incertae sedis	Cryptococcus	Cryptococcus adeliensis
New.ReferenceOTU679	0.473524	-0.157489	1.68265	-0.0935961	0.92543	NA	Ascomycota	Dothideomycetes	unidentified	unidentified	unidentified	Dothideomycetes sp
New.ReferenceOTU1405	0.0757203	-0.275904	2.96346	-0.0931019	0.925823	NA	unidentified	unidentified	unidentified	unidentified	unidentified	fungal endophyte
New.ReferenceOTU1407	0.628027	-0.19372	1.12877	-0.171621	0.863736	NA	Ascomycota	Dothideomycetes	Capnodiales	unidentified	unidentified	Capnodiales sp
New.ReferenceOTU1311	0.28077	0.0699439	1.73073	0.040413	0.967764	NA	Ascomycota	unidentified	unidentified	unidentified	unidentified	uncultured Pezizomycotina
New.ReferenceOTU451	0	NA	NA	NA	NA	NA	Basidiomycota	Agaricomycetes	Auriculariales	Incertae sedis	Elmerina	Elmerina holophaea
New.ReferenceOTU1087	0.19794	1.26836	2.48903	0.509581	0.610345	NA	Ascomycota	Dothideomycetes	Dothideales	Dothioraceae	Aureobasidium	Aureobasidium pullulans
New.ReferenceOTU293	0.481738	-0.897382	2.35307	-0.381367	0.702931	NA	unidentified	unidentified	unidentified	unidentified	unidentified	fungal sp TRN254
New.ReferenceOTU853	0.798393	-1.86645	1.25218	-1.49056	0.136078	NA	Ascomycota	Dothideomycetes	Pleosporales	unidentified	unidentified	fungal endophyte WMS23
New.ReferenceOTU852	0.338257	-1.36214	1.54321	-0.882669	0.377415	NA	Ascomycota	Dothideomycetes	Capnodiales	Teratosphaeriaceae	Catenulostroma	Catenulostroma hermanusense
New.ReferenceOTU855	0.121068	0.448638	2.81931	0.15913	0.873566	NA	Ascomycota	Dothideomycetes	unidentified	unidentified	unidentified	Dothideomycetes sp
New.ReferenceOTU858	0.55118	-0.304995	2.22936	-0.136808	0.891182	NA	Basidiomycota	Microbotryomycetes	Sporidiobolales	Incertae sedis	Rhodotorula	Rhodotorula nothofagi
New.ReferenceOTU1729	0.438671	-0.268014	1.21345	-0.220869	0.825195	NA	Ascomycota	Sordariomycetes	Hypocreales	Incertae sedis	Acremonium	Acremonium implicatum
New.ReferenceOTU925	0.0639458	-0.700291	2.9618	-0.236441	0.813091	NA	Ascomycota	unidentified	unidentified	unidentified	unidentified	uncultured Pezizomycotina
New.ReferenceOTU924	0.708564	0.86854	1.22988	0.706196	0.480066	NA	Basidiomycota	Agaricomycetes	Russulales	Peniophoraceae	Dendrophora	Dendrophora sp
New.ReferenceOTU923	1.20707	1.82598	0.809368	2.25606	0.0240672	NA	Ascomycota	Sordariomycetes	Coniochaetales	unidentified	unidentified	Coniochaetales sp
New.ReferenceOTU617	0.378881	-0.192931	1.5294	-0.126148	0.899615	NA	Ascomycota	unidentified	unidentified	unidentified	unidentified	Ascomycota sp
New.ReferenceOTU1249	0.0922501	0.82527	2.96249	0.278573	0.780573	NA	Ascomycota	unidentified	unidentified	unidentified	unidentified	uncultured Ascomycota
New.ReferenceOTU2037	0.497181	-2.48857	1.402	-1.77502	0.0758947	NA	Ascomycota	unidentified	unidentified	unidentified	unidentified	Ascomycota sp
New.ReferenceOTU2031	0.481021	-1.62521	1.42771	-1.13834	0.254979	NA	Basidiomycota	Pucciniomycetes	Pucciniales	Incertae sedis	Aecidium	Aecidium sp PUR 43011
New.ReferenceOTU1244	0	NA	NA	NA	NA	NA	Ascomycota	unidentified	unidentified	unidentified	unidentified	Ascomycota sp
New.ReferenceOTU1899	1.03768	-1.05189	0.739408	-1.42261	0.15485	NA	Basidiomycota	Cystobasidiomycetes	Erythrobasidiales	Incertae sedis	Erythrobasidium	Erythrobasidium hasegawianum
New.ReferenceOTU663	1.20694	0.459199	1.16115	0.39547	0.692496	NA	Ascomycota	Dothideomycetes	Pleosporales	Sporormiaceae	Preussia	Preussia sp
New.ReferenceOTU667	1.18729	1.26642	1.13282	1.11794	0.263591	NA	Ascomycota	Dothideomycetes	Pleosporales	Phaeosphaeriaceae	Phaeosphaeriopsis	Phaeosphaeriopsis nolinae
New.ReferenceOTU1071	0	0	0	0	1	NA	Ascomycota	Incertae sedis	Incertae sedis	Incertae sedis	Vermispora	Vermispora spermatophaga
New.ReferenceOTU1070	0.157529	-0.655924	2.95852	-0.221707	0.824542	NA	Ascomycota	Dothideomycetes	Capnodiales	Mycosphaerellaceae	Pseudocercospora	Pseudocercospora opuntia
New.ReferenceOTU1072	0.0316324	0.2503	2.96419	0.0844412	0.932706	NA	Ascomycota	Lecanoromycetes	Teloschistales	Physciaceae	Hyperphyscia	Hyperphyscia adglutinata
New.ReferenceOTU1077	0.182749	-0.106288	2.51456	-0.0422689	0.966284	NA	Basidiomycota	Exobasidiomycetes	Exobasidiales	Exobasidiaceae	Exobasidium	Exobasidium yoshinagae
New.ReferenceOTU1677	0.120395	-0.324339	2.96185	-0.109506	0.912801	NA	Ascomycota	Dothideomycetes	Pleosporales	Pleosporaceae	Alternaria	Alternaria helianthiinficiens
New.ReferenceOTU1676	0.024883	-0.0862935	2.96421	-0.0291118	0.976775	NA	Basidiomycota	Microbotryomycetes	Sporidiobolales	Incertae sedis	Rhodotorula	Rhodotorula armeniaca
New.ReferenceOTU1411	0.345347	-0.43362	1.73491	-0.249938	0.802635	NA	Basidiomycota	Agaricostilbomycetes	unidentified	unidentified	unidentified	Agaricostilbomycetes sp
New.ReferenceOTU1410	0.683345	1.5504	1.82727	0.848476	0.396173	NA	Ascomycota	unidentified	unidentified	unidentified	unidentified	uncultured Ascomycota
New.ReferenceOTU306	0.0851795	0.579855	2.96353	0.195663	0.844874	NA	Ascomycota	Dothideomycetes	Capnodiales	Davidiellaceae	Cladosporium	Cladosporium exasperatum
New.ReferenceOTU1307	0.326306	-0.596782	1.3155	-0.453655	0.650077	NA	unidentified	unidentified	unidentified	unidentified	unidentified	uncultured fungus
New.ReferenceOTU1302	0.611848	-0.559093	1.68042	-0.33271	0.739353	NA	Ascomycota	Eurotiomycetes	Eurotiales	Trichocomaceae	Penicillium	Penicillium bialowiezense
New.ReferenceOTU1301	0.331212	0.865609	1.27149	0.680781	0.49601	NA	Ascomycota	Dothideomycetes	unidentified	unidentified	unidentified	Dothideomycetes sp
New.ReferenceOTU1300	0.984414	-1.63186	1.04257	-1.56522	0.117531	NA	Ascomycota	unidentified	unidentified	unidentified	unidentified	Ascomycota sp
New.ReferenceOTU115	0.788504	1.3095	1.09345	1.19758	0.23108	NA	Basidiomycota	Microbotryomycetes	Sporidiobolales	Incertae sedis	Sporobolomyces	Sporobolomyces gracilis
New.ReferenceOTU116	0.342493	-1.59294	1.53806	-1.03568	0.300352	NA	Ascomycota	Dothideomycetes	Capnodiales	unidentified	unidentified	Capnodiales sp
New.ReferenceOTU1017	0.864246	-2.48478	1.14495	-2.17022	0.0299904	NA	Basidiomycota	Agaricomycetes	Agaricales	Psathyrellaceae	Parasola	Parasola leiocephala
New.ReferenceOTU1092	0.0667839	-0.436202	2.96346	-0.147193	0.882979	NA	Ascomycota	Sordariomycetes	unidentified	unidentified	unidentified	Sordariomycetes sp
New.ReferenceOTU1546	0.114897	-0.103806	2.9614	-0.035053	0.972037	NA	Ascomycota	Dothideomycetes	Capnodiales	Teratosphaeriaceae	unidentified	Teratosphaeriaceae sp
New.ReferenceOTU843	0.754591	-2.0223	1.10888	-1.82374	0.0681918	NA	Ascomycota	Sordariomycetes	Microascales	Microascaceae	Microascus	Microascus brevicaulis
New.ReferenceOTU931	0.0886397	-0.275904	2.96346	-0.0931019	0.925823	NA	Ascomycota	Dothideomycetes	Capnodiales	Mycosphaerellaceae	Septoria	cf Septoria sp CBS 134910
New.ReferenceOTU2025	0.211904	-1.22463	2.21394	-0.553144	0.580165	NA	Ascomycota	Saccharomycetes	Saccharomycetales	Saccharomycetaceae	Tetrapisispora	Tetrapisispora blattae
New.ReferenceOTU353	0	NA	NA	NA	NA	NA	Ascomycota	Orbiliomycetes	unidentified	unidentified	unidentified	Orbiliomycetes sp
New.ReferenceOTU141	0.363893	-1.49044	1.83911	-0.810413	0.417703	NA	Ascomycota	Lecanoromycetes	Lecanorales	Incertae sedis	Solenopsora	Solenopsora holophaea
New.ReferenceOTU1935	0.364412	1.18616	1.68466	0.704093	0.481375	NA	Basidiomycota	Agaricomycetes	Agaricales	Psathyrellaceae	Coprinopsis	Coprinopsis phlyctidospora
New.ReferenceOTU1930	0.650332	-0.450723	1.56423	-0.288145	0.773236	NA	Ascomycota	Dothideomycetes	Pleosporales	Phaeosphaeriaceae	Sclerostagonospora	Sclerostagonospora sp
New.ReferenceOTU614	0.216091	0.0291523	2.17023	0.0134328	0.989282	NA	Ascomycota	Dothideomycetes	Capnodiales	Incertae sedis	Capnobotryella	Capnobotryella sp
New.ReferenceOTU1792	1.12859	-1.731	1.08686	-1.59266	0.111238	NA	Ascomycota	Dothideomycetes	Pleosporales	Phaeosphaeriaceae	Sclerostagonospora	Sclerostagonospora sp
New.ReferenceOTU1241	0.117082	-0.964879	2.96037	-0.325932	0.744476	NA	Ascomycota	Dothideomycetes	Dothideales	Dothioraceae	Aureobasidium	Aureobasidium sp
New.ReferenceOTU1423	1.17613	1.71085	0.879127	1.94608	0.0516447	NA	Basidiomycota	Tremellomycetes	Tremellales	Incertae sedis	Cryptococcus	Cryptococcus oeirensis
New.ReferenceOTU1428	0.0363326	0.2503	2.96419	0.0844412	0.932706	NA	unidentified	unidentified	unidentified	unidentified	unidentified	fungal sp FG7
New.ReferenceOTU725	0.80404	-0.291219	1.14688	-0.253922	0.799556	NA	Basidiomycota	Agaricomycetes	Boletales	Suillaceae	Suillus	Suillus granulatus
New.ReferenceOTU1331	0.0342504	-0.537288	2.9628	-0.181344	0.856097	NA	Basidiomycota	Microbotryomycetes	Sporidiobolales	Incertae sedis	Rhodotorula	Rhodotorula aurantiaca
New.ReferenceOTU1338	0.0157714	0.0814133	2.96442	0.0274634	0.97809	NA	Ascomycota	Dothideomycetes	Capnodiales	Teratosphaeriaceae	unidentified	Teratosphaeriaceae sp
New.ReferenceOTU2522	0.568878	-0.0824575	1.29008	-0.0639167	0.949037	NA	Ascomycota	unidentified	unidentified	unidentified	unidentified	Ascomycota sp
New.ReferenceOTU439	0.20022	0.7968	2.2004	0.362116	0.717265	NA	Ascomycota	Dothideomycetes	Capnodiales	Mycosphaerellaceae	Passalora	Passalora zambiae
New.ReferenceOTU121	0.824857	1.77598	1.00643	1.76463	0.077626	NA	Ascomycota	unidentified	unidentified	unidentified	unidentified	melanized limestone ascomycete CR_2004
New.ReferenceOTU431	0	NA	NA	NA	NA	NA	Ascomycota	Sordariomycetes	Hypocreales	Incertae sedis	Acremonium	Acremonium sp
New.ReferenceOTU122	0.640568	-0.857271	1.52217	-0.563189	0.573306	NA	Ascomycota	unidentified	unidentified	unidentified	unidentified	Ascomycota sp
New.ReferenceOTU124	0.23413	-0.823514	1.94141	-0.424183	0.671432	NA	Ascomycota	unidentified	unidentified	unidentified	unidentified	Ascomycota sp
New.ReferenceOTU2238	0.190506	-0.848285	2.27926	-0.372176	0.709762	NA	Ascomycota	Lecanoromycetes	Ostropales	Stictidaceae	unidentified	Stictidaceae sp
New.ReferenceOTU2234	1.16557	0.951003	1.22657	0.775336	0.438141	NA	Ascomycota	Eurotiomycetes	Chaetothyriales	unidentified	unidentified	Chaetothyriales sp
New.ReferenceOTU2235	1.19005	-0.610198	0.964279	-0.632803	0.526863	NA	Ascomycota	Dothideomycetes	Botryosphaeriales	Incertae sedis	Homortomyces	Homortomyces combreti
New.ReferenceOTU543	1.29825	0.0525523	1.14872	0.0457486	0.963511	NA	Ascomycota	Pezizomycetes	Pezizales	Sarcosomataceae	Strumella	Strumella sp olrim138
New.ReferenceOTU1741	1.16289	-0.320795	1.14799	-0.279441	0.779906	NA	Ascomycota	Dothideomycetes	unidentified	unidentified	unidentified	Dothideomycetes sp
New.ReferenceOTU949	0.318358	-0.68151	1.80722	-0.377103	0.706097	NA	unidentified	unidentified	unidentified	unidentified	unidentified	Fungi sp
New.ReferenceOTU1921	0.308538	1.5976	2.0959	0.76225	0.445911	NA	Ascomycota	Dothideomycetes	Capnodiales	Mycosphaerellaceae	Mycosphaerella	Mycosphaerella sp CPC 12200
New.ReferenceOTU601	0.0489883	0.420702	2.96394	0.14194	0.887127	NA	Ascomycota	Incertae sedis	Incertae sedis	Incertae sedis	Knufia	Knufia sp
New.ReferenceOTU1658	1.08313	-0.226159	0.687241	-0.329082	0.742094	NA	Ascomycota	Sordariomycetes	unidentified	unidentified	unidentified	Sordariomycetes sp
New.ReferenceOTU1656	0.690891	0.00234265	1.32314	0.00177052	0.998587	NA	Ascomycota	Dothideomycetes	unidentified	unidentified	unidentified	Dothideomycetes sp
New.ReferenceOTU1431	0.0233232	-0.404353	2.96359	-0.13644	0.891473	NA	Basidiomycota	Tremellomycetes	Tremellales	Incertae sedis	Cryptococcus	Cryptococcus sp CBS 12710
New.ReferenceOTU1430	0.153361	-1.37543	2.67138	-0.514876	0.60664	NA	Ascomycota	Dothideomycetes	Capnodiales	Davidiellaceae	Davidiella	Davidiella tassiana
New.ReferenceOTU1436	0.520972	-0.949839	0.98723	-0.962125	0.335987	NA	Ascomycota	Sordariomycetes	Sordariales	Sordariaceae	Neurospora	Neurospora crassa
New.ReferenceOTU738	0	NA	NA	NA	NA	NA	Ascomycota	Dothideomycetes	Capnodiales	unidentified	unidentified	Capnodiales sp
New.ReferenceOTU730	0.66638	-0.283406	1.55535	-0.182213	0.855415	NA	Ascomycota	unidentified	unidentified	unidentified	unidentified	Ascomycota sp
New.ReferenceOTU734	0.927392	-0.329915	1.14591	-0.287905	0.773419	NA	Ascomycota	Eurotiomycetes	Chaetothyriales	Herpotrichiellaceae	unidentified	Herpotrichiellaceae sp
New.ReferenceOTU424	1.04696	-0.941159	1.01665	-0.925749	0.354576	NA	Ascomycota	Incertae sedis	Incertae sedis	Incertae sedis	Knufia	Knufia sp
New.ReferenceOTU425	0.119616	-0.595824	2.96035	-0.201268	0.840489	NA	Ascomycota	Eurotiomycetes	Onygenales	Ajellomycetaceae	Ajellomyces	Ajellomyces capsulatus
New.ReferenceOTU427	0.14606	0.406895	2.73069	0.149008	0.881547	NA	Ascomycota	Dothideomycetes	Myriangiales	Elsinoaceae	unidentified	Elsinoaceae sp KNUC262
New.ReferenceOTU421	0.0163294	0.0814133	2.96442	0.0274634	0.97809	NA	Ascomycota	unidentified	unidentified	unidentified	unidentified	ascomycete sp MA 4905
New.ReferenceOTU133	0	NA	NA	NA	NA	NA	unidentified	unidentified	unidentified	unidentified	unidentified	uncultured fungus
New.ReferenceOTU1744	0.0834529	-0.593672	2.96149	-0.200464	0.841118	NA	Ascomycota	Dothideomycetes	Capnodiales	Capnodiaceae	Capnodium	Capnodium coffeae
New.ReferenceOTU2223	0.933147	-2.1257	1.15111	-1.84665	0.0647973	NA	Ascomycota	Eurotiomycetes	Chaetothyriales	Herpotrichiellaceae	Exophiala	Exophiala xenobiotica
New.ReferenceOTU2309	0.626497	1.54312	1.01685	1.51754	0.12913	NA	Ascomycota	Dothideomycetes	unidentified	unidentified	unidentified	Dothideomycetes sp
New.ReferenceOTU2228	0.477114	-1.28428	1.82193	-0.704904	0.48087	NA	Ascomycota	Lecanoromycetes	Peltigerales	Pannariaceae	Degelia	Degelia plumbea
New.ReferenceOTU586	0.545252	-0.469786	1.81647	-0.258626	0.795924	NA	Ascomycota	Dothideomycetes	Capnodiales	Teratosphaeriaceae	unidentified	Teratosphaeriaceae sp
New.ReferenceOTU2002	0	NA	NA	NA	NA	NA	Basidiomycota	Agaricomycetes	Agaricales	unidentified	unidentified	Agaricales sp
New.ReferenceOTU1916	0.561666	1.65808	1.35728	1.22162	0.221853	NA	Ascomycota	Eurotiomycetes	Chaetothyriales	unidentified	unidentified	Chaetothyriales sp
New.ReferenceOTU1914	0.806018	-0.781172	1.15978	-0.673554	0.500595	NA	Ascomycota	Dothideomycetes	unidentified	unidentified	unidentified	Dothideomycetes sp
New.ReferenceOTU1918	1.22439	-0.50781	0.81683	-0.621684	0.53415	NA	Basidiomycota	Agaricomycetes	Agaricales	unidentified	unidentified	Agaricales sp
New.ReferenceOTU639	0.456482	2.16468	1.73517	1.24753	0.212204	NA	Ascomycota	Dothideomycetes	Capnodiales	unidentified	unidentified	Capnodiales sp
New.ReferenceOTU632	0.181242	-0.655777	1.988	-0.329867	0.7415	NA	Ascomycota	Dothideomycetes	Capnodiales	Mycosphaerellaceae	Mycosphaerella	Mycosphaerella sp MUCC573
New.ReferenceOTU637	0.479059	-0.923328	1.06321	-0.868435	0.385156	NA	Ascomycota	Dothideomycetes	Capnodiales	unidentified	unidentified	Capnodiales sp
New.ReferenceOTU1225	1.16688	-1.49235	1.22488	-1.21836	0.223086	NA	Ascomycota	Dothideomycetes	Pleosporales	Sporormiaceae	Sporormiella	Sporormiella irregularis
New.ReferenceOTU1687	1.21901	-0.387927	0.957591	-0.405107	0.685399	NA	Ascomycota	Dothideomycetes	Pleosporales	Pleosporaceae	Curvularia	Curvularia inaequalis
New.ReferenceOTU1684	0.0863905	0.063385	2.96298	0.0213923	0.982933	NA	Ascomycota	Dothideomycetes	Pleosporales	unidentified	unidentified	Pleosporales sp
New.ReferenceOTU1136	0.122201	-1.17732	2.9591	-0.397863	0.690731	NA	Ascomycota	Dothideomycetes	Botryosphaeriales	Botryosphaeriaceae	Lasiodiplodia	Lasiodiplodia rubropurpurea
New.ReferenceOTU1689	0.622594	0.182314	2.46255	0.0740347	0.940983	NA	unidentified	unidentified	unidentified	unidentified	unidentified	uncultured fungus
New.ReferenceOTU1130	0.679407	0.193331	1.18132	0.163656	0.870002	NA	Basidiomycota	Agaricomycetes	Agaricales	Agaricaceae	Coprinus	Coprinus foetidellus
New.ReferenceOTU1131	0.249843	1.25305	2.95973	0.423368	0.672027	NA	Ascomycota	Eurotiomycetes	Chaetothyriales	Herpotrichiellaceae	Phaeomoniella	Phaeomoniella sp
New.ReferenceOTU709	0.742405	1.28901	1.03102	1.25023	0.211215	NA	Ascomycota	unidentified	unidentified	unidentified	unidentified	uncultured Ascomycota
New.ReferenceOTU708	1.07714	2.9199	1.00665	2.90059	0.00372455	NA	Ascomycota	Dothideomycetes	unidentified	unidentified	unidentified	Dothideomycetes sp
New.ReferenceOTU704	0.15612	-0.79208	2.95919	-0.267668	0.788955	NA	unidentified	unidentified	unidentified	unidentified	unidentified	Fungi sp
New.ReferenceOTU706	1.27617	-1.03296	1.20569	-0.856734	0.391592	NA	Ascomycota	Dothideomycetes	Myriangiales	Myriangiaceae	Myriangium	Myriangium sp UFMG_BRO197
New.ReferenceOTU1350	0.412427	0.0373989	1.68912	0.0221411	0.982335	NA	Ascomycota	Eurotiomycetes	Chaetothyriales	Herpotrichiellaceae	Exophiala	Exophiala sp
New.ReferenceOTU381	0.186367	-0.79815	2.53748	-0.314544	0.753108	NA	Basidiomycota	Tremellomycetes	Tremellales	unidentified	unidentified	Tremellales sp
New.ReferenceOTU389	0.862406	0.805602	1.10798	0.727089	0.467171	NA	Ascomycota	unidentified	unidentified	unidentified	unidentified	uncultured Ascomycota
New.ReferenceOTU147	0.199856	0.806129	2.53415	0.318107	0.750404	NA	Ascomycota	Dothideomycetes	Pleosporales	Leptosphaeriaceae	Plenodomus	Plenodomus enteroleucus
New.ReferenceOTU410	0.355503	-0.593943	1.87596	-0.316608	0.751541	NA	Ascomycota	Lecanoromycetes	Candelariales	Candelariaceae	Candelaria	Candelaria pacifica
New.ReferenceOTU142	0.804514	-0.329872	0.890409	-0.370472	0.711031	NA	Ascomycota	Dothideomycetes	Pleosporales	Montagnulaceae	Paraconiothyrium	Paraconiothyrium hawaiiense
New.ReferenceOTU148	0.593786	0.129571	1.31843	0.0982766	0.921713	NA	Ascomycota	unidentified	unidentified	unidentified	unidentified	uncultured Pezizomycotina
New.ReferenceOTU2496	1.01328	-1.13553	1.21587	-0.933922	0.350344	NA	Ascomycota	Dothideomycetes	Capnodiales	Incertae sedis	Phaeotheca	Phaeotheca triangularis
New.ReferenceOTU2495	0.159625	0.438312	2.3049	0.190165	0.84918	NA	Ascomycota	Dothideomycetes	Dothideales	Dothioraceae	Aureobasidium	Aureobasidium pullulans
New.ReferenceOTU2492	0.0842867	0.0819589	2.96397	0.0276517	0.97794	NA	Basidiomycota	Agaricomycetes	Agaricales	unidentified	unidentified	Agaricales sp
New.ReferenceOTU2490	0.771157	0.0140371	1.23867	0.0113325	0.990958	NA	Ascomycota	Dothideomycetes	Capnodiales	unidentified	unidentified	Capnodiales sp
New.ReferenceOTU2254	0.564634	1.83436	1.31642	1.39345	0.163485	NA	Ascomycota	Lecanoromycetes	Candelariales	Candelariaceae	Candelariella	Candelariella rosulans
New.ReferenceOTU898	0.770835	0.735172	2.01178	0.365434	0.714788	NA	Basidiomycota	Agaricomycetes	Agaricales	Agaricaceae	Coprinus	Coprinus comatus
New.ReferenceOTU894	1.21839	-0.734528	0.85147	-0.862658	0.388325	NA	Basidiomycota	Agaricomycetes	Agaricales	unidentified	unidentified	Agaricales sp
New.ReferenceOTU896	0.940435	-1.22881	1.10455	-1.11249	0.265927	NA	Ascomycota	Lecanoromycetes	Teloschistales	Physciaceae	Physcia	Physcia leptalea
New.ReferenceOTU892	0.919259	-1.73916	1.13147	-1.53708	0.124273	NA	Ascomycota	Eurotiomycetes	Chaetothyriales	Incertae sedis	Coniosporium	Coniosporium sp h6
New.ReferenceOTU2262	0.499749	2.45999	1.95	1.26153	0.207117	NA	Ascomycota	Eurotiomycetes	Eurotiales	Trichocomaceae	Aspergillus	Aspergillus sp YM3
New.ReferenceOTU561	0.931571	-0.705025	0.928781	-0.759086	0.447801	NA	Ascomycota	Incertae sedis	Incertae sedis	Incertae sedis	Xenoconiothyrium	Xenoconiothyrium catenata
New.ReferenceOTU560	0.146732	1.14774	2.96054	0.38768	0.698253	NA	Basidiomycota	Tremellomycetes	Tremellales	Incertae sedis	Bullera	Bullera dendrophila
New.ReferenceOTU563	1.29955	2.04178	1.31411	1.55373	0.120248	NA	Ascomycota	unidentified	unidentified	unidentified	unidentified	Ascomycota sp
New.ReferenceOTU568	0.124797	0.154886	2.96274	0.0522778	0.958307	NA	unidentified	unidentified	unidentified	unidentified	unidentified	uncultured fungus
New.ReferenceOTU109	0.64994	0.631469	1.14856	0.549792	0.582462	NA	Ascomycota	Dothideomycetes	Pleosporales	Montagnulaceae	Paraconiothyrium	Paraconiothyrium hawaiiense
New.ReferenceOTU963	1.15764	-0.596185	0.712077	-0.837247	0.402454	NA	Glomeromycota	Glomeromycetes	Glomerales	Glomeraceae	unidentified	Glomeraceae sp
New.ReferenceOTU965	0.521576	-1.34693	1.11539	-1.20759	0.227207	NA	unidentified	unidentified	unidentified	unidentified	unidentified	uncultured ectomycorrhizal fungus
New.ReferenceOTU967	0.700353	0.633587	1.43321	0.442077	0.658434	NA	Ascomycota	unidentified	unidentified	unidentified	unidentified	uncultured Ascomycota
New.ReferenceOTU2079	0.472168	0.538814	1.29069	0.417463	0.67634	NA	Ascomycota	Dothideomycetes	Capnodiales	unidentified	unidentified	Capnodiales sp
New.ReferenceOTU2106	0.774044	0.656126	1.31573	0.498677	0.618007	NA	unidentified	unidentified	unidentified	unidentified	unidentified	fungal sp EXP0528F
New.ReferenceOTU2100	0.219159	0.211267	1.94096	0.108847	0.913324	NA	Basidiomycota	Agaricostilbomycetes	Agaricostilbales	Agaricostilbaceae	Bensingtonia	Bensingtonia phyllada
New.ReferenceOTU2108	0.312954	0.877036	2.03942	0.430042	0.667165	NA	Ascomycota	Dothideomycetes	Dothideales	Dothioraceae	Pringsheimia	Pringsheimia sp
New.ReferenceOTU1902	0.189654	-1.56161	2.9569	-0.528122	0.597414	NA	Ascomycota	Lecanoromycetes	unidentified	unidentified	unidentified	Lecanoromycetes sp
New.ReferenceOTU626	0.349928	-0.182428	1.44973	-0.125836	0.899862	NA	Ascomycota	Dothideomycetes	Pleosporales	unidentified	unidentified	Pleosporales sp
New.ReferenceOTU624	0.514136	-0.776127	1.50435	-0.51592	0.60591	NA	Ascomycota	Dothideomycetes	Pleosporales	Phaeosphaeriaceae	Stagonospora	Stagonospora pseudovitensis
New.ReferenceOTU620	0.0843065	-0.251224	2.96146	-0.0848311	0.932396	NA	Ascomycota	Dothideomycetes	Capnodiales	Capnodiaceae	Capnodium	Capnodium sp FF_2011
New.ReferenceOTU1237	0.449706	0.930877	1.2165	0.76521	0.444147	NA	Ascomycota	Dothideomycetes	Pleosporales	unidentified	unidentified	Pleosporales sp GS3_3_5
New.ReferenceOTU1235	1.06926	0.870722	1.03834	0.838575	0.401708	NA	Ascomycota	Eurotiomycetes	Onygenales	Ajellomycetaceae	Ajellomyces	Ajellomyces capsulatus
New.ReferenceOTU1239	0.0216806	0.221695	2.96423	0.0747899	0.940382	NA	Basidiomycota	Tremellomycetes	unidentified	unidentified	unidentified	uncultured Cryptococcus
New.ReferenceOTU1238	0.8944	1.4583	1.13282	1.28732	0.197982	NA	Ascomycota	Saccharomycetes	Saccharomycetales	Incertae sedis	Candida	Candida smithsonii
New.ReferenceOTU712	0.780012	-0.288013	1.42096	-0.202689	0.839378	NA	Ascomycota	Dothideomycetes	Capnodiales	Teratosphaeriaceae	Teratosphaeria	Teratosphaeria capensis
New.ReferenceOTU1698	0.808638	0.638164	1.05456	0.605148	0.545081	NA	Ascomycota	Dothideomycetes	Pleosporales	unidentified	unidentified	Pleosporales sp
New.ReferenceOTU714	0.0971502	-1.00845	2.96009	-0.34068	0.733344	NA	Basidiomycota	Pucciniomycetes	Septobasidiales	Septobasidiaceae	Septobasidium	Septobasidium carestianum
New.ReferenceOTU1127	0.0581944	-0.0869277	2.9642	-0.0293258	0.976605	NA	Basidiomycota	Agaricomycetes	Agaricales	unidentified	unidentified	Agaricales sp
New.ReferenceOTU1123	0.257528	-0.683421	2.17504	-0.31421	0.753361	NA	Ascomycota	Leotiomycetes	Helotiales	Dermateaceae	unidentified	Dermateaceae sp
New.ReferenceOTU1120	0.139822	0.252361	2.96372	0.0851499	0.932142	NA	Ascomycota	Dothideomycetes	Capnodiales	Mycosphaerellaceae	Xenosonderhenia	Xenosonderhenia syzygii
New.ReferenceOTU1692	0.593767	0.474259	1.14586	0.41389	0.678954	NA	Basidiomycota	Agaricomycetes	Agaricales	Strophariaceae	Psilocybe	Psilocybe sp
New.ReferenceOTU1341	0.261714	0.0947174	1.96598	0.0481783	0.961574	NA	Ascomycota	Sordariomycetes	Xylariales	Amphisphaeriaceae	Phlogicylindrium	Phlogicylindrium eucalyptorum
New.ReferenceOTU1347	0.123043	-0.263184	2.96222	-0.0888469	0.929204	NA	Ascomycota	Dothideomycetes	Capnodiales	Teratosphaeriaceae	unidentified	uncultured Teratosphaeriaceae
New.ReferenceOTU397	0.18209	0.576729	2.30235	0.250496	0.802204	NA	Ascomycota	Eurotiomycetes	Chaetothyriales	unidentified	unidentified	Chaetothyriales sp
New.ReferenceOTU398	0.961446	1.69874	1.38304	1.22827	0.219347	NA	Ascomycota	Eurotiomycetes	Chaetothyriales	Chaetothyriaceae	unidentified	Chaetothyriaceae sp
New.ReferenceOTU154	0	NA	NA	NA	NA	NA	Ascomycota	Dothideomycetes	Pleosporales	unidentified	unidentified	Pleosporales sp
New.ReferenceOTU155	0.0116616	-0.247226	2.9642	-0.0834037	0.933531	NA	Ascomycota	Dothideomycetes	Capnodiales	Teratosphaeriaceae	unidentified	uncultured Teratosphaeriaceae
New.ReferenceOTU150	0.884701	1.28465	0.999154	1.28574	0.198533	NA	unidentified	unidentified	unidentified	unidentified	unidentified	fungal sp EXP0528F
New.ReferenceOTU2485	0.548984	-1.07905	1.47179	-0.733156	0.463463	NA	Ascomycota	unidentified	unidentified	unidentified	unidentified	ascomycete sp IZ_962
New.ReferenceOTU2487	0	NA	NA	NA	NA	NA	Ascomycota	unidentified	unidentified	unidentified	unidentified	Ascomycota sp
New.ReferenceOTU2243	1.18371	-0.873627	0.771492	-1.13239	0.257472	NA	Ascomycota	Dothideomycetes	Pleosporales	Lophiostomataceae	Lophiostoma	Lophiostoma sp DMW2181
New.ReferenceOTU2246	0.094553	0.548733	2.96281	0.185207	0.853067	NA	Ascomycota	Eurotiomycetes	Chaetothyriales	unidentified	unidentified	Chaetothyriales sp
New.ReferenceOTU2249	0.705001	-2.43938	1.40783	-1.73272	0.0831453	NA	Ascomycota	Saccharomycetes	Saccharomycetales	Saccharomycodaceae	Hanseniaspora	Hanseniaspora uvarum
New.ReferenceOTU578	0.0727172	-0.653524	2.96208	-0.22063	0.82538	NA	Ascomycota	Eurotiomycetes	Chaetothyriales	Herpotrichiellaceae	Capronia	Capronia sp
New.ReferenceOTU976	0.207403	-0.943099	2.83889	-0.332207	0.739733	NA	Ascomycota	Dothideomycetes	Pleosporales	Pleosporaceae	Alternaria	Alternaria solani
New.ReferenceOTU882	0.142785	0.772072	2.96275	0.260593	0.794406	NA	unidentified	unidentified	unidentified	unidentified	unidentified	Fungi sp
New.ReferenceOTU880	0.131764	0.229492	2.76622	0.0829621	0.933882	NA	Basidiomycota	unidentified	unidentified	unidentified	unidentified	Basidiomycota sp
New.ReferenceOTU2062	0.28937	0.0999769	1.74729	0.0572184	0.954371	NA	Ascomycota	Dothideomycetes	Capnodiales	unidentified	unidentified	Capnodiales sp
New.ReferenceOTU2060	0.227155	-0.575189	1.61751	-0.355601	0.722139	NA	Ascomycota	Dothideomycetes	Capnodiales	unidentified	unidentified	Capnodiales sp
New.ReferenceOTU2067	0.409332	-1.03762	1.63718	-0.633782	0.526223	NA	Ascomycota	Dothideomycetes	Myriangiales	unidentified	unidentified	Myriangiales sp
New.ReferenceOTU2065	0.429248	1.35541	1.80523	0.750827	0.452757	NA	unidentified	unidentified	unidentified	unidentified	unidentified	uncultured fungus
New.ReferenceOTU2115	0.832938	-1.20765	1.81469	-0.66549	0.505737	NA	Ascomycota	Saccharomycetes	Saccharomycetales	Saccharomycodaceae	Hanseniaspora	Hanseniaspora uvarum
New.ReferenceOTU2113	0.759267	0.0799395	1.2208	0.0654812	0.947791	NA	Ascomycota	Dothideomycetes	Capnodiales	Mycosphaerellaceae	Mycosphaerella	Mycosphaerella sp 5 ICMP 18846
New.ReferenceOTU2111	0.459012	0.961346	1.35644	0.708726	0.478494	NA	Ascomycota	Lecanoromycetes	Teloschistales	Teloschistaceae	Eilifdahlia	Eilifdahlia dahlii
New.ReferenceOTU2118	0.560714	-2.78273	2.94289	-0.94558	0.344363	NA	Ascomycota	Eurotiomycetes	Mycocaliciales	Mycocaliciaceae	Chaenothecopsis	Chaenothecopsis resinophila
New.ReferenceOTU1977	0.196874	-0.225967	2.50716	-0.0901287	0.928185	NA	Ascomycota	Eurotiomycetes	Chaetothyriales	unidentified	unidentified	Chaetothyriales sp
New.ReferenceOTU11	0.890516	-0.404668	1.24787	-0.324288	0.74572	NA	Ascomycota	Lecanoromycetes	Lecanorales	Parmeliaceae	Usnea	Usnea sp F206
New.ReferenceOTU16	0.259143	-1.20751	1.883	-0.641267	0.521349	NA	Ascomycota	unidentified	unidentified	unidentified	unidentified	Ascomycota sp
New.ReferenceOTU1805	0.940718	1.0375	0.816238	1.27108	0.203701	NA	Ascomycota	Sordariomycetes	Diaporthales	Diaporthaceae	Diaporthe	Diaporthe viticola
New.ReferenceOTU1801	0.1245	-0.352945	2.96188	-0.119162	0.905147	NA	Ascomycota	unidentified	unidentified	unidentified	unidentified	Ascomycota sp
New.ReferenceOTU1802	0.970936	-0.828886	0.772155	-1.07347	0.28306	NA	Ascomycota	Dothideomycetes	Pleosporales	Pleosporaceae	Alternaria	Alternaria alternata
New.ReferenceOTU1204	0.537188	-0.263177	1.03673	-0.253854	0.799608	NA	Basidiomycota	unidentified	unidentified	unidentified	unidentified	Basidiomycota sp
New.ReferenceOTU767	0.258346	-0.375049	2.20821	-0.169843	0.865134	NA	Ascomycota	Leotiomycetes	Helotiales	Incertae sedis	Chlorencoelia	Chlorencoelia torta
New.ReferenceOTU1119	0.645735	0.0706433	1.15676	0.06107	0.951303	NA	Ascomycota	Dothideomycetes	Dothideales	Dothideaceae	Endoconidioma	Endoconidioma populi
New.ReferenceOTU763	0.651186	0.242563	1.24221	0.195267	0.845184	NA	Ascomycota	Eurotiomycetes	Chaetothyriales	Herpotrichiellaceae	Phaeomoniella	Phaeomoniella sp
New.ReferenceOTU1114	0.680746	0.240748	1.37496	0.175094	0.861005	NA	Ascomycota	Dothideomycetes	Pleosporales	Pleosporaceae	Drechslera	Drechslera poae
New.ReferenceOTU406	0.931267	-0.423676	1.41901	-0.298571	0.765268	NA	Basidiomycota	Agaricomycetes	Agaricales	unidentified	unidentified	Agaricales sp
New.ReferenceOTU1599	0	NA	NA	NA	NA	NA	Ascomycota	Dothideomycetes	Capnodiales	Mycosphaerellaceae	unidentified	Mycosphaerellaceae sp
New.ReferenceOTU1595	0.493915	-0.588416	1.20855	-0.486879	0.626344	NA	Basidiomycota	Agaricomycetes	Agaricales	Psathyrellaceae	Coprinellus	Coprinellus micaceus
New.ReferenceOTU1590	1.23181	0.119323	0.805953	0.148053	0.882301	NA	Ascomycota	Dothideomycetes	Capnodiales	Davidiellaceae	Cladosporium	Cladosporium exasperatum
New.ReferenceOTU1591	0.130766	0.796347	2.96263	0.268797	0.788086	NA	Ascomycota	Leotiomycetes	Rhytismatales	Rhytismataceae	Lophodermium	Lophodermium sp 0705HL2
New.ReferenceOTU157	0.314879	-1.65672	1.85678	-0.892255	0.372256	NA	Ascomycota	unidentified	unidentified	unidentified	unidentified	Ascomycota sp
New.ReferenceOTU1570	0.617285	-1.63371	1.65314	-0.988248	0.323031	NA	Ascomycota	Dothideomycetes	Myriangiales	Elsinoaceae	unidentified	Elsinoaceae sp ZLY_2010b
New.ReferenceOTU1579	0.0473141	0.420702	2.96394	0.14194	0.887127	NA	Ascomycota	Saccharomycetes	Saccharomycetales	Incertae sedis	Debaryomyces	Debaryomyces nepalensis
New.ReferenceOTU1377	1.08282	-0.974704	0.854708	-1.1404	0.254122	NA	Ascomycota	Sordariomycetes	Coniochaetales	Coniochaetaceae	Coniochaeta	Coniochaeta sp
New.ReferenceOTU1374	0	0	0	0	1	NA	Ascomycota	unidentified	unidentified	unidentified	unidentified	Ascomycota sp
New.ReferenceOTU1371	1.05269	1.10029	0.878364	1.25266	0.210331	NA	Ascomycota	unidentified	unidentified	unidentified	unidentified	uncultured Pezizomycotina
New.ReferenceOTU1152	0.152618	0.272212	2.10412	0.129371	0.897064	NA	Basidiomycota	Agaricostilbomycetes	Agaricostilbales	Agaricostilbaceae	Bensingtonia	Bensingtonia miscanthi
New.ReferenceOTU369	0.342	-0.0291014	1.76971	-0.0164442	0.98688	NA	Ascomycota	Dothideomycetes	Capnodiales	Teratosphaeriaceae	unidentified	Teratosphaeriaceae sp
New.ReferenceOTU368	0.750635	-0.156952	1.12521	-0.139487	0.889066	NA	Ascomycota	Sordariomycetes	Hypocreales	Incertae sedis	Acremonium	Acremonium alternatum
New.ReferenceOTU362	0	NA	NA	NA	NA	NA	Ascomycota	unidentified	unidentified	unidentified	unidentified	Ascomycota sp
New.ReferenceOTU169	0.260207	-0.793068	2.14552	-0.369638	0.711652	NA	Ascomycota	Dothideomycetes	Capnodiales	Mycosphaerellaceae	Phaeothecoidea	Phaeothecoidea melaleuca
New.ReferenceOTU164	0.294592	0.376885	1.51153	0.249341	0.803097	NA	Basidiomycota	Agaricostilbomycetes	Agaricostilbales	Agaricostilbaceae	Bensingtonia	Bensingtonia sp PYCC 5562
New.ReferenceOTU166	0.848643	-0.86381	1.0598	-0.815069	0.415033	NA	Ascomycota	Dothideomycetes	Pleosporales	Cucurbitariaceae	Curreya	Curreya sp
New.ReferenceOTU2476	0.22739	0.136438	1.8144	0.0751971	0.940058	NA	Ascomycota	Dothideomycetes	Capnodiales	unidentified	unidentified	Capnodiales sp
New.ReferenceOTU2477	0.33732	-1.01681	1.56489	-0.649761	0.515847	NA	Ascomycota	Dothideomycetes	Pleosporales	unidentified	unidentified	Pleosporales sp
New.ReferenceOTU2472	0.41762	-0.598414	1.21388	-0.492975	0.62203	NA	unidentified	unidentified	unidentified	unidentified	unidentified	fungal sp P1S14
New.ReferenceOTU183	0.460352	0.64716	1.28769	0.502575	0.615263	NA	Ascomycota	Dothideomycetes	Pleosporales	unidentified	unidentified	Pleosporales sp
New.ReferenceOTU187	0.311658	-1.59979	2.95665	-0.541082	0.588451	NA	Ascomycota	Saccharomycetes	Saccharomycetales	Saccharomycodaceae	Hanseniaspora	Hanseniaspora uvarum
New.ReferenceOTU2276	0.951507	1.74544	0.943753	1.84947	0.0643901	NA	Ascomycota	unidentified	unidentified	unidentified	unidentified	Ascomycota sp
New.ReferenceOTU2273	0.471452	-2.02616	1.57528	-1.28622	0.198366	NA	Ascomycota	Dothideomycetes	Capnodiales	unidentified	unidentified	Neodevriesiaceae sp CCFEE 5569
New.ReferenceOTU508	0.929198	-1.70459	1.02944	-1.65584	0.0977537	NA	unidentified	unidentified	unidentified	unidentified	unidentified	fungal sp TRN254
New.ReferenceOTU506	0.842782	-1.01734	1.12695	-0.902739	0.366664	NA	Ascomycota	Dothideomycetes	Pleosporales	unidentified	unidentified	Pleosporales sp
New.ReferenceOTU501	0.0429959	-0.247226	2.9642	-0.0834037	0.933531	NA	Ascomycota	Dothideomycetes	Capnodiales	Davidiellaceae	Davidiella	Davidiella tassiana
New.ReferenceOTU982	0.815457	-1.28909	0.952735	-1.35305	0.176041	NA	Ascomycota	Sordariomycetes	Hypocreales	Incertae sedis	Stachybotrys	Stachybotrys chartarum
New.ReferenceOTU2058	0.584962	1.44085	1.27969	1.12594	0.260192	NA	Ascomycota	Dothideomycetes	Capnodiales	Mycosphaerellaceae	Pseudocercospora	Pseudocercospora sphaerellae_eugeniae
New.ReferenceOTU0	0.981093	-0.900922	1.02701	-0.877228	0.380363	NA	Basidiomycota	Microbotryomycetes	Microbotryales	Microbotryaceae	Sphacelotheca	Sphacelotheca polygoni_persicariae
New.ReferenceOTU4	0.477673	1.63677	1.76669	0.926466	0.354204	NA	Ascomycota	unidentified	unidentified	unidentified	unidentified	Ascomycota sp
New.ReferenceOTU2292	0.992339	-0.0725784	1.41138	-0.0514239	0.958988	NA	Ascomycota	Eurotiomycetes	Chaetothyriales	Herpotrichiellaceae	Capronia	Capronia peltigerae
New.ReferenceOTU2293	0.155471	-0.375025	2.65491	-0.141257	0.887667	NA	Ascomycota	Incertae sedis	Incertae sedis	Incertae sedis	Liberomyces	Liberomyces sp
New.ReferenceOTU2121	0.426399	0.872768	1.65899	0.526082	0.598831	NA	Basidiomycota	Tremellomycetes	Tremellales	unidentified	unidentified	uncultured Tremellales
New.ReferenceOTU2127	1.10653	1.43195	0.915502	1.56412	0.117791	NA	Basidiomycota	Tremellomycetes	Tremellales	Incertae sedis	Cryptococcus	Cryptococcus dimennae
New.ReferenceOTU2128	0.535327	0.30619	1.53849	0.19902	0.842247	NA	Ascomycota	Dothideomycetes	Pleosporales	unidentified	unidentified	Pleosporales sp
New.ReferenceOTU1156	0.188915	-1.16961	2.54798	-0.459034	0.64621	NA	Ascomycota	Dothideomycetes	unidentified	unidentified	unidentified	Dothideomycetes sp
New.ReferenceOTU1969	0.401833	1.40691	1.16201	1.21075	0.225991	NA	Ascomycota	Dothideomycetes	Dothideales	Dothideaceae	Endoconidioma	Endoconidioma populi
New.ReferenceOTU1963	0.182199	-0.0172067	2.27712	-0.00755634	0.993971	NA	Basidiomycota	Ustilaginomycetes	Ustilaginales	Incertae sedis	Farysizyma	Farysizyma setubalensis
New.ReferenceOTU1966	1.08653	1.29918	0.901335	1.4414	0.149472	NA	unidentified	unidentified	unidentified	unidentified	unidentified	fungal sp FF_2011
New.ReferenceOTU1817	1.1759	-1.00547	1.66831	-0.60269	0.546715	NA	Ascomycota	Dothideomycetes	Dothideales	Dothideaceae	Endoconidioma	Endoconidioma populi
New.ReferenceOTU1815	0.229581	0.0199485	2.54085	0.0078511	0.993736	NA	Basidiomycota	Agaricostilbomycetes	Agaricostilbales	Agaricostilbaceae	Bensingtonia	Bensingtonia sp PYCC 5566
New.ReferenceOTU1812	0.294308	0.0114119	1.53987	0.00741098	0.994087	NA	Ascomycota	Dothideomycetes	Pleosporales	unidentified	unidentified	Pleosporales sp MUT 4397
New.ReferenceOTU1745	0.150067	-0.0418854	2.35154	-0.0178119	0.985789	NA	Basidiomycota	Tremellomycetes	Tremellales	Incertae sedis	Dioszegia	Dioszegia zsoltii var. yunnanensis
New.ReferenceOTU1743	0.129964	0.955608	2.76138	0.346062	0.729296	NA	Basidiomycota	Agaricomycetes	Corticiales	Corticiaceae	unidentified	uncultured Sistotrema
New.ReferenceOTU1217	1.15536	-1.02992	0.832641	-1.23693	0.216113	NA	Ascomycota	Dothideomycetes	Dothideales	Dothideaceae	Endoconidioma	Endoconidioma populi
New.ReferenceOTU776	0	0	0	0	1	NA	unidentified	unidentified	unidentified	unidentified	unidentified	uncultured fungus
New.ReferenceOTU778	0.738388	1.6011	1.00847	1.58765	0.112365	NA	Ascomycota	Sordariomycetes	Xylariales	unidentified	unidentified	Xylariales sp
New.ReferenceOTU1581	0.279263	0.941268	1.54736	0.608307	0.542984	NA	Ascomycota	Sordariomycetes	Hypocreales	unidentified	unidentified	Hypocreales sp
New.ReferenceOTU1580	1.05892	-3.23281	1.6575	-1.95041	0.0511271	NA	Ascomycota	Dothideomycetes	Pleosporales	unidentified	unidentified	Pleosporales sp
New.ReferenceOTU1566	0.500242	0.0704313	1.63599	0.0430511	0.965661	NA	Basidiomycota	Agaricomycetes	Polyporales	unidentified	unidentified	Polyporales sp
New.ReferenceOTU1563	0.454654	0.304405	1.43713	0.211815	0.832251	NA	Ascomycota	Eurotiomycetes	Chaetothyriales	Herpotrichiellaceae	Phaeomoniella	Phaeomoniella sp
New.ReferenceOTU1562	0.481184	-2.57838	2.45317	-1.05104	0.29324	NA	unidentified	unidentified	unidentified	unidentified	unidentified	uncultured fungus
New.ReferenceOTU1361	0.0646802	-0.707793	2.96176	-0.238977	0.811123	NA	Ascomycota	Eurotiomycetes	Chaetothyriales	Herpotrichiellaceae	Capronia	Capronia sp
New.ReferenceOTU1363	0.243617	1.09948	1.94314	0.565828	0.571511	NA	Ascomycota	unidentified	unidentified	unidentified	unidentified	Ascomycota sp
New.ReferenceOTU1365	0	NA	NA	NA	NA	NA	unidentified	unidentified	unidentified	unidentified	unidentified	uncultured fungus
New.ReferenceOTU1367	1.1512	2.60052	2.93831	0.885039	0.376136	NA	Ascomycota	Sordariomycetes	Incertae sedis	Plectosphaerellaceae	Verticillium	Verticillium dahliae
New.ReferenceOTU178	0.174545	-0.822014	2.9584	-0.277858	0.781121	NA	Ascomycota	Dothideomycetes	Venturiales	Venturiaceae	Venturia	Venturia pyrina
New.ReferenceOTU179	0.178746	-0.12451	2.26857	-0.0548847	0.95623	NA	Ascomycota	Dothideomycetes	Dothideales	Dothideaceae	Dothidea	Dothidea sp CanS_64
New.ReferenceOTU172	0.233036	-0.0650225	2.80608	-0.023172	0.981513	NA	Ascomycota	Dothideomycetes	Pleosporales	unidentified	unidentified	Pleosporales sp
New.ReferenceOTU2462	0.447234	1.88073	1.57617	1.19323	0.232778	NA	Ascomycota	Dothideomycetes	Pleosporales	unidentified	unidentified	Pleosporales sp
New.ReferenceOTU2461	1.28087	0.561998	0.941175	0.597124	0.550424	NA	Ascomycota	Taphrinomycetes	Taphrinales	Taphrinaceae	Lalaria	Lalaria carpini
New.ReferenceOTU2460	0.574281	-0.138787	1.21577	-0.114156	0.909114	NA	Ascomycota	Sordariomycetes	Xylariales	Diatrypaceae	Diatrype	Diatrype sp FPT_5
New.ReferenceOTU192	0.316638	0.209054	2.05432	0.101763	0.918945	NA	Ascomycota	Dothideomycetes	Botryosphaeriales	unidentified	unidentified	uncultured Botryosphaeriales
New.ReferenceOTU195	0.669191	-0.0822146	1.8311	-0.044899	0.964188	NA	Ascomycota	unidentified	unidentified	unidentified	unidentified	uncultured Ascomycota
New.ReferenceOTU513	0.394027	0.0345543	1.65123	0.0209264	0.983304	NA	Basidiomycota	Tremellomycetes	Tremellales	unidentified	unidentified	Tremellales sp PNB099A
New.ReferenceOTU990	0.316187	-0.447811	1.85415	-0.241518	0.809153	NA	Ascomycota	Eurotiomycetes	Chaetothyriales	Herpotrichiellaceae	Exophiala	Exophiala sp
New.ReferenceOTU993	0.608971	-1.93789	2.12689	-0.911137	0.362223	NA	Ascomycota	Sordariomycetes	Xylariales	unidentified	unidentified	Xylariales sp
New.ReferenceOTU997	0.195561	0.729086	2.56436	0.284315	0.776169	NA	Basidiomycota	Agaricomycetes	Agaricales	unidentified	unidentified	Agaricales sp
New.ReferenceOTU200	0.0480231	0.0814133	2.96442	0.0274634	0.97809	NA	Basidiomycota	Agaricomycetes	Agaricales	unidentified	unidentified	Agaricales sp
New.ReferenceOTU201	0.549233	-2.28518	1.94392	-1.17555	0.239774	NA	Ascomycota	Dothideomycetes	Incertae sedis	Incertae sedis	Scleroconidioma	Scleroconidioma sphagnicola
New.ReferenceOTU2044	0.0108403	0.0814133	2.96442	0.0274634	0.97809	NA	Ascomycota	Eurotiomycetes	Pyrenulales	Massariaceae	Massaria	Massaria pyri
New.ReferenceOTU2046	0.406333	-0.157936	1.34472	-0.117449	0.906504	NA	Ascomycota	Eurotiomycetes	Chaetothyriales	Herpotrichiellaceae	unidentified	Herpotrichiellaceae sp
New.ReferenceOTU2285	0.629802	-0.641701	0.811033	-0.791215	0.428819	NA	Ascomycota	Dothideomycetes	Dothideales	Dothideaceae	Endoconidioma	Endoconidioma populi
New.ReferenceOTU907	0.297984	-0.575603	1.88213	-0.305826	0.759737	NA	Basidiomycota	Tremellomycetes	Tremellales	Incertae sedis	Dioszegia	Dioszegia zsoltii var. yunnanensis
New.ReferenceOTU2138	1.19941	0.121374	0.718881	0.168838	0.865924	NA	Basidiomycota	Agaricomycetes	Agaricales	Strophariaceae	Gymnopilus	Gymnopilus junonius
New.ReferenceOTU2131	1.25964	-0.291609	0.8865	-0.328944	0.742198	NA	Ascomycota	unidentified	unidentified	unidentified	unidentified	Ascomycota sp
New.ReferenceOTU1957	0.334277	-1.51006	1.69435	-0.891231	0.372805	NA	unidentified	unidentified	unidentified	unidentified	unidentified	uncultured fungus
New.ReferenceOTU1952	0.431909	-1.51191	2.03094	-0.744436	0.456613	NA	Ascomycota	Eurotiomycetes	Chaetothyriales	Herpotrichiellaceae	Phaeomoniella	Phaeomoniella sp
New.ReferenceOTU1959	1.27881	1.09274	0.798214	1.36898	0.171006	NA	Basidiomycota	Tremellomycetes	Tremellales	Incertae sedis	Cryptococcus	Cryptococcus aureus
New.ReferenceOTU39	0.604518	0.413017	1.21281	0.340545	0.733446	NA	Ascomycota	Dothideomycetes	Pleosporales	unidentified	unidentified	Pleosporales sp
New.ReferenceOTU1822	1.00115	-1.2979	0.930102	-1.39544	0.162883	NA	Ascomycota	Eurotiomycetes	Chaetothyriales	Herpotrichiellaceae	unidentified	Herpotrichiellaceae sp
New.ReferenceOTU1820	0.275018	0.263533	1.85723	0.141896	0.887162	NA	unidentified	unidentified	unidentified	unidentified	unidentified	uncultured fungus
New.ReferenceOTU743	0.383563	-2.33218	1.75762	-1.32689	0.184544	NA	Ascomycota	Dothideomycetes	unidentified	unidentified	unidentified	Dothideomycetes sp
New.ReferenceOTU742	0.763319	-1.20869	1.32034	-0.915436	0.359963	NA	unidentified	unidentified	unidentified	unidentified	unidentified	uncultured fungus
New.ReferenceOTU747	0.337467	0.718422	1.68622	0.426055	0.670068	NA	Ascomycota	Dothideomycetes	Pleosporales	Phaeosphaeriaceae	Sclerostagonospora	Sclerostagonospora sp CBS 118224
New.ReferenceOTU1551	0.47034	0.174172	1.82777	0.0952923	0.924083	NA	Basidiomycota	Tremellomycetes	Tremellales	Incertae sedis	Cryptococcus	Cryptococcus sp CBS 8358
New.ReferenceOTU1008	0.667359	0.306612	0.939213	0.326456	0.744079	NA	Ascomycota	unidentified	unidentified	unidentified	unidentified	Ascomycota sp
New.ReferenceOTU1555	0.146824	0.0885626	1.88313	0.0470293	0.96249	NA	unidentified	unidentified	unidentified	unidentified	unidentified	fungal sp ARIZ AZ1110
New.ReferenceOTU1003	0.160487	0.112947	2.37581	0.0475403	0.962083	NA	unidentified	unidentified	unidentified	unidentified	unidentified	uncultured fungus
New.ReferenceOTU1393	0.63132	-0.64021	1.53482	-0.417124	0.676588	NA	Ascomycota	Dothideomycetes	Capnodiales	Mycosphaerellaceae	Septoria	Septoria cretae
New.ReferenceOTU349	0.301362	0.552106	1.83073	0.301576	0.762975	NA	Basidiomycota	Tremellomycetes	Tremellales	Incertae sedis	Dioszegia	Dioszegia zsoltii var. yunnanensis
New.ReferenceOTU1486	0.439602	0.948684	1.70755	0.555583	0.578496	NA	Ascomycota	Eurotiomycetes	Eurotiales	Trichocomaceae	Aspergillus	Aspergillus sydowii
New.ReferenceOTU696	1.23931	0.0894156	0.966322	0.0925318	0.926275	NA	Basidiomycota	Agaricomycetes	Agaricales	Psathyrellaceae	Coprinellus	Coprinellus impatiens
New.ReferenceOTU2457	0.396753	0.881663	1.55248	0.567906	0.570099	NA	Ascomycota	Dothideomycetes	Capnodiales	Teratosphaeriaceae	Catenulostroma	Catenulostroma eucalyptorum
New.ReferenceOTU2454	0.60781	-1.36723	1.16775	-1.17083	0.241667	NA	Basidiomycota	Agaricomycetes	Agaricales	unidentified	unidentified	Agaricales sp
New.ReferenceOTU2455	0.131767	0.513066	2.73762	0.187413	0.851337	NA	Ascomycota	Dothideomycetes	Capnodiales	Mycosphaerellaceae	Passalora	Passalora californica
New.ReferenceOTU528	0.0116616	-0.247226	2.9642	-0.0834037	0.933531	NA	Ascomycota	Dothideomycetes	Capnodiales	Davidiellaceae	Cladosporium	Cladosporium fusiforme
New.ReferenceOTU836	0.543244	-0.0452253	1.13987	-0.0396759	0.968352	NA	Basidiomycota	Tremellomycetes	Tremellales	Incertae sedis	Cryptococcus	Cryptococcus dimennae
New.ReferenceOTU835	1.27089	-0.349135	0.966557	-0.361216	0.717938	NA	Ascomycota	Dothideomycetes	Incertae sedis	Incertae sedis	Phaeosclera	Phaeosclera sp
New.ReferenceOTU838	1.27919	0.296072	0.826783	0.358101	0.720268	NA	Ascomycota	Sordariomycetes	Xylariales	Xylariaceae	unidentified	Xylariales sp M71
New.ReferenceOTU2140	0.233612	-0.805109	2.14658	-0.375066	0.707612	NA	Ascomycota	Lecanoromycetes	Lecanorales	Parmeliaceae	Parmotrema	Parmotrema fistulatum
New.ReferenceOTU2141	1.13157	-1.38573	1.29545	-1.06969	0.284759	NA	Ascomycota	Dothideomycetes	unidentified	unidentified	unidentified	Dothideomycetes sp
New.ReferenceOTU1942	0.158965	-0.575512	2.33194	-0.246795	0.805067	NA	Ascomycota	Incertae sedis	Incertae sedis	Incertae sedis	Xenobotrytis	Xenobotrytis acaducospora
New.ReferenceOTU1947	0.761711	0.559064	1.6002	0.34937	0.726811	NA	Ascomycota	Dothideomycetes	Capnodiales	Mycosphaerellaceae	Mycosphaerella	Mycosphaerella sp L357
New.ReferenceOTU21	1.2901	0.988962	1.00517	0.983877	0.325176	NA	Ascomycota	unidentified	unidentified	unidentified	unidentified	Ascomycota sp
New.ReferenceOTU1838	0.0847502	0.563513	2.96357	0.190147	0.849194	NA	Ascomycota	Sordariomycetes	Diaporthales	Diaporthaceae	Phomopsis	Phomopsis sp NY7453a
New.ReferenceOTU1836	0.447532	1.41162	1.36781	1.03203	0.302058	NA	Basidiomycota	Agaricomycetes	Russulales	unidentified	unidentified	Russulales sp
New.ReferenceOTU756	1.12349	1.08529	1.25367	0.865691	0.38666	NA	Ascomycota	Sordariomycetes	Xylariales	unidentified	unidentified	Xylariales sp
New.ReferenceOTU755	0.641706	2.37061	1.56193	1.51774	0.129079	NA	Basidiomycota	Agaricomycetes	Russulales	Peniophoraceae	unidentified	Peniophoraceae sp
New.ReferenceOTU1162	0.999028	1.21568	0.737022	1.64946	0.0990544	NA	Ascomycota	Dothideomycetes	Capnodiales	Incertae sedis	Toxicocladosporium	Toxicocladosporium leucadendri
New.ReferenceOTU1161	0.121745	-0.467483	2.96223	-0.157814	0.874603	NA	Ascomycota	Dothideomycetes	Capnodiales	Davidiellaceae	Cladosporium	Cladosporium pseudiridis
New.ReferenceOTU1166	0.569217	0.314049	1.2056	0.260491	0.794485	NA	Ascomycota	Sordariomycetes	Coniochaetales	Coniochaetaceae	unidentified	Coniochaetaceae sp
New.ReferenceOTU1768	0.229915	0.482197	1.60061	0.301258	0.763217	NA	Ascomycota	Dothideomycetes	Dothideales	Dothideaceae	Endoconidioma	Endoconidioma populi
New.ReferenceOTU1018	0.210635	-0.805317	1.75258	-0.459504	0.645872	NA	Ascomycota	Dothideomycetes	Capnodiales	unidentified	unidentified	Neodevriesiaceae sp CCFEE 5569
New.ReferenceOTU1544	0.619517	-0.280996	1.00546	-0.279469	0.779885	NA	Basidiomycota	Ustilaginomycetes	Ustilaginales	Ustilaginaceae	unidentified	Ustilaginaceae sp
New.ReferenceOTU1014	0.209538	-1.12643	1.77818	-0.633471	0.526426	NA	Ascomycota	Dothideomycetes	Dothideales	Dothideaceae	Endoconidioma	Endoconidioma populi
New.ReferenceOTU1495	0.833041	-0.241851	0.840912	-0.287605	0.773649	NA	Ascomycota	Pezizomycetes	Pezizales	Pyronemataceae	Pyronema	Pyronema sp GSL5_6_2
New.ReferenceOTU687	1.04385	-0.095976	1.15812	-0.0828723	0.933953	NA	Ascomycota	unidentified	unidentified	unidentified	unidentified	uncultured Ascomycota
New.ReferenceOTU351	0	0	0	0	1	NA	Basidiomycota	Tremellomycetes	unidentified	unidentified	unidentified	Tremellomycetes sp
New.ReferenceOTU356	0.720811	2.19366	1.31382	1.66968	0.0949835	NA	Zygomycota	Incertae sedis	Mortierellales	Mortierellaceae	unidentified	Mortierellaceae sp
New.ReferenceOTU357	0	0	0	0	1	NA	Ascomycota	unidentified	unidentified	unidentified	unidentified	Ascomycota sp
New.ReferenceOTU355	0.197152	1.03106	1.97448	0.522191	0.601537	NA	Ascomycota	Lecanoromycetes	Rhizocarpales	Catillariaceae	Catillaria	Catillaria nigroclavata
New.ReferenceOTU359	0.198488	0.627677	2.84785	0.220404	0.825557	NA	Ascomycota	Dothideomycetes	unidentified	unidentified	unidentified	Dothideomycetes sp
New.ReferenceOTU2446	0.740547	-0.198259	1.23039	-0.161135	0.871987	NA	Basidiomycota	Agaricomycetes	Agaricales	Strophariaceae	Hypholoma	Hypholoma australe
New.ReferenceOTU534	1.02523	0.633577	0.866054	0.731567	0.464433	NA	Basidiomycota	unidentified	unidentified	unidentified	unidentified	Basidiomycota sp
New.ReferenceOTU532	0.965665	0.40609	0.902245	0.450089	0.652646	NA	Ascomycota	Sordariomycetes	Sordariales	unidentified	unidentified	Sordariales sp
New.ReferenceOTU533	0.0530381	0.2503	2.96419	0.0844412	0.932706	NA	Ascomycota	Dothideomycetes	Myriangiales	Elsinoaceae	unidentified	Elsinoaceae sp ZLY_2010b
New.ReferenceOTU1556	0	NA	NA	NA	NA	NA	Basidiomycota	Microbotryomycetes	Sporidiobolales	Incertae sedis	Rhodotorula	Rhodotorula acheniorum
New.ReferenceOTU820	1.26054	-0.129612	0.893831	-0.145007	0.884705	NA	Ascomycota	Dothideomycetes	Pleosporales	unidentified	unidentified	Pleosporales sp
New.ReferenceOTU825	0.753398	-0.376771	0.917687	-0.410566	0.681391	NA	Chytridiomycota	unidentified	unidentified	unidentified	unidentified	uncultured Chytridiomycota
New.ReferenceOTU1416	1.18169	0.309674	1.12493	0.275282	0.7831	NA	Ascomycota	Dothideomycetes	Capnodiales	Davidiellaceae	Cladosporium	Cladosporium exasperatum
New.ReferenceOTU693	0.291397	1.70699	2.03556	0.838586	0.401701	NA	Basidiomycota	Tremellomycetes	Tremellales	unidentified	unidentified	Tremellales sp
New.ReferenceOTU54	0.438952	1.02377	1.63612	0.625726	0.531495	NA	Ascomycota	Leotiomycetes	Helotiales	Vibrisseaceae	Phialocephala	Phialocephala fluminis
New.ReferenceOTU53	0.0712067	0.2503	2.96419	0.0844412	0.932706	NA	Ascomycota	Eurotiomycetes	Chaetothyriales	unidentified	unidentified	Chaetothyriales sp
New.ReferenceOTU1849	0.832988	0.537098	1.19404	0.449817	0.652842	NA	Ascomycota	Lecanoromycetes	Ostropales	unidentified	unidentified	Ostropales sp s056
New.ReferenceOTU1159	1.19606	-0.430426	0.645575	-0.666732	0.504943	NA	Ascomycota	Dothideomycetes	Pleosporales	Incertae sedis	Didymella	Didymella sp
New.ReferenceOTU1625	1.1045	-0.706059	1.11168	-0.635126	0.525346	NA	unidentified	unidentified	unidentified	unidentified	unidentified	uncultured fungus
New.ReferenceOTU1712	0.0929039	-0.591942	2.9615	-0.199879	0.841575	NA	Basidiomycota	Exobasidiomycetes	Exobasidiales	Exobasidiaceae	Exobasidium	Exobasidium yoshinagae
New.ReferenceOTU1534	0.0837873	-0.135623	2.96327	-0.0457681	0.963495	NA	Ascomycota	Eurotiomycetes	Pyrenulales	Massariaceae	Massaria	Massaria pyri
New.ReferenceOTU1025	0.124561	0.807716	2.96258	0.27264	0.78513	NA	Basidiomycota	Tremellomycetes	Tremellales	Incertae sedis	Kockovaella	Kockovaella machilophila
New.ReferenceOTU320	0.0685008	-0.864962	2.96089	-0.292129	0.770188	NA	Ascomycota	Leotiomycetes	Helotiales	Incertae sedis	Chlorencoelia	Chlorencoelia torta
New.ReferenceOTU1442	0.848455	-0.394439	1.02102	-0.386318	0.699261	NA	Ascomycota	Incertae sedis	Incertae sedis	Incertae sedis	Knufia	Knufia sp FH_2012
New.ReferenceOTU2437	0.0326589	0.2503	2.96419	0.0844412	0.932706	NA	Ascomycota	unidentified	unidentified	unidentified	unidentified	uncultured Ascomycota
New.ReferenceOTU785	0.110512	-0.0863395	2.96331	-0.0291362	0.976756	NA	Basidiomycota	Cystobasidiomycetes	Erythrobasidiales	unidentified	unidentified	uncultured Erythrobasidiales
New.ReferenceOTU2383	0	NA	NA	NA	NA	NA	unidentified	unidentified	unidentified	unidentified	unidentified	uncultured fungus
New.ReferenceOTU2381	1.05097	0.499476	1.14287	0.437036	0.662085	NA	Ascomycota	Dothideomycetes	Pleosporales	Pleosporaceae	unidentified	Pleosporaceae sp
New.ReferenceOTU250	0.0390028	0.2503	2.96419	0.0844412	0.932706	NA	Ascomycota	Eurotiomycetes	Chaetothyriales	unidentified	unidentified	Chaetothyriales sp
New.ReferenceOTU814	0.118619	-1.03369	2.95994	-0.349226	0.72692	NA	Ascomycota	Saccharomycetes	Saccharomycetales	Incertae sedis	Candida	Candida fennica
New.ReferenceOTU810	1.12403	-0.131721	0.869249	-0.151534	0.879554	NA	Ascomycota	Sordariomycetes	Hypocreales	Hypocreaceae	Trichoderma	Trichoderma koningiopsis
New.ReferenceOTU2094	0.42359	-0.765165	1.10419	-0.692966	0.488331	NA	Ascomycota	Dothideomycetes	Pleosporales	Phaeosphaeriaceae	Sclerostagonospora	Sclerostagonospora sp CBS 118224
New.ReferenceOTU2095	0.836954	-1.90864	1.66101	-1.14908	0.250521	NA	Ascomycota	unidentified	unidentified	unidentified	unidentified	uncultured Ascomycota
New.ReferenceOTU1200	1.1174	-1.21717	0.927713	-1.31201	0.189516	NA	unidentified	unidentified	unidentified	unidentified	unidentified	uncultured fungus
New.ReferenceOTU527	1.14354	0.322823	0.984184	0.328011	0.742903	NA	Ascomycota	Lecanoromycetes	unidentified	unidentified	unidentified	Lecanoromycetes sp
New.ReferenceOTU2362	0.35552	-0.243057	1.55298	-0.15651	0.875631	NA	Ascomycota	Dothideomycetes	Myriangiales	Elsinoaceae	unidentified	Elsinoaceae sp KNUC262
New.ReferenceOTU1299	0.0448088	-0.415524	2.96354	-0.140212	0.888492	NA	Ascomycota	Dothideomycetes	Capnodiales	Mycosphaerellaceae	Pseudocercospora	Pseudocercospora sphaerulinae
New.ReferenceOTU1142	0.419387	0.769516	1.17922	0.652566	0.514036	NA	Basidiomycota	Microbotryomycetes	Sporidiobolales	Incertae sedis	Sporobolomyces	Sporobolomyces elongatus
New.ReferenceOTU1700	0.0296954	-0.247226	2.9642	-0.0834037	0.933531	NA	Basidiomycota	Agaricomycetes	Atheliales	Atheliaceae	unidentified	Atheliaceae sp
New.ReferenceOTU1706	0.600276	0.965213	1.06157	0.909227	0.36323	NA	Ascomycota	Dothideomycetes	Dothideales	Dothideaceae	Endoconidioma	Endoconidioma populi
New.ReferenceOTU1705	0.479738	-2.321	1.74286	-1.33172	0.182952	NA	Ascomycota	Dothideomycetes	Capnodiales	Capnodiaceae	Capnodium	Capnodium sp
New.ReferenceOTU1503	0.280289	-0.340147	1.73067	-0.19654	0.844187	NA	Ascomycota	Dothideomycetes	unidentified	unidentified	unidentified	Dothideomycetes sp
New.ReferenceOTU1525	1.00777	-1.75949	1.0917	-1.6117	0.107028	NA	Ascomycota	Dothideomycetes	Pleosporales	Testudinaceae	Lepidosphaeria	Lepidosphaeria nicotiae
New.ReferenceOTU1524	1.27819	0.152611	0.98602	0.154775	0.876999	NA	unidentified	unidentified	unidentified	unidentified	unidentified	fungal sp VKM FW_2422
New.ReferenceOTU1037	0.612095	-0.529144	1.30061	-0.406844	0.684123	NA	Ascomycota	Dothideomycetes	Capnodiales	unidentified	unidentified	Capnodiales sp
New.ReferenceOTU1036	0.347435	-1.89382	2.2934	-0.82577	0.408935	NA	Basidiomycota	Tremellomycetes	unidentified	unidentified	unidentified	uncultured Cryptococcus
New.ReferenceOTU334	0.902364	3.29094	2.92535	1.12497	0.2606	NA	Ascomycota	Saccharomycetes	Saccharomycetales	Saccharomycetaceae	Saccharomyces	Saccharomyces eubayanus
New.ReferenceOTU2427	0.295022	0.708719	2.16052	0.328032	0.742888	NA	Ascomycota	Dothideomycetes	Myriangiales	Incertae sedis	Endosporium	Endosporium sp
New.ReferenceOTU2425	0.857422	0.71606	1.07217	0.667858	0.504224	NA	Ascomycota	Sordariomycetes	Xylariales	Xylariaceae	Barrmaelia	Barrmaelia macrospora
New.ReferenceOTU2424	1.11851	-0.840305	1.0963	-0.766492	0.443384	NA	Ascomycota	Dothideomycetes	Pleosporales	unidentified	unidentified	Pleosporales sp
New.ReferenceOTU2428	1.07264	-1.50113	1.0399	-1.44353	0.14887	NA	Ascomycota	Dothideomycetes	Capnodiales	Incertae sedis	Toxicocladosporium	Toxicocladosporium leucadendri
New.ReferenceOTU793	0.221792	-0.189513	2.42488	-0.0781536	0.937706	NA	Ascomycota	Lecanoromycetes	Agyriales	Agyriaceae	Trapeliopsis	Trapeliopsis californica
New.ReferenceOTU1593	0.184498	-0.00873702	2.51862	-0.00346898	0.997232	NA	Ascomycota	unidentified	unidentified	unidentified	unidentified	Ascomycota sp
New.ReferenceOTU2398	0.813324	1.19732	1.33145	0.899258	0.368515	NA	Ascomycota	Dothideomycetes	Incertae sedis	Micropeltidaceae	Stomiopeltis	Stomiopeltis sp RS52
New.ReferenceOTU2392	0.218019	0.828345	2.46001	0.336725	0.736324	NA	Ascomycota	Dothideomycetes	Pleosporales	Montagnulaceae	Paraconiothyrium	Paraconiothyrium sp NO237
New.ReferenceOTU2396	0.16842	-1.08164	2.29103	-0.472119	0.636842	NA	Ascomycota	Incertae sedis	Incertae sedis	Pseudeurotiaceae	unidentified	Pseudeurotiaceae sp
New.ReferenceOTU244	1.09209	1.1139	1.06026	1.05059	0.293448	NA	Ascomycota	Sordariomycetes	Xylariales	Diatrypaceae	Eutypella	Eutypella sp MS_2011_F20
New.ReferenceOTU247	0.0593185	-0.275904	2.96346	-0.0931019	0.925823	NA	Ascomycota	Taphrinomycetes	Taphrinales	Taphrinaceae	unidentified	Taphrinaceae sp
New.ReferenceOTU808	0	NA	NA	NA	NA	NA	Basidiomycota	Exobasidiomycetes	Exobasidiales	Exobasidiaceae	Exobasidium	Exobasidium formosanum
New.ReferenceOTU806	0.295594	-1.78168	1.86813	-0.953721	0.340225	NA	Ascomycota	Dothideomycetes	Pleosporales	Incertae sedis	Phoma	Phoma paspali
New.ReferenceOTU2082	0.203289	0.942127	2.20195	0.42786	0.668753	NA	Ascomycota	Eurotiomycetes	Eurotiales	Trichocomaceae	Penicillium	Penicillium sp
New.ReferenceOTU2089	0	NA	NA	NA	NA	NA	Basidiomycota	Tremellomycetes	Tremellales	Incertae sedis	Trimorphomyces	Trimorphomyces papilionaceus
New.ReferenceOTU2088	1.15588	0.532127	1.23517	0.430813	0.666604	NA	Ascomycota	Dothideomycetes	Pleosporales	Sporormiaceae	Preussia	Preussia tetramera
New.ReferenceOTU2177	0.816947	3.13825	1.67039	1.87875	0.0602787	NA	Ascomycota	Dothideomycetes	Myriangiales	Incertae sedis	Endosporium	Endosporium sp
New.ReferenceOTU1571	0.148039	0.552336	2.96279	0.186424	0.852112	NA	Ascomycota	Dothideomycetes	Myriangiales	unidentified	unidentified	Myriangiales sp
New.ReferenceOTU2370	0.82745	-0.875189	1.23101	-0.71095	0.477115	NA	Ascomycota	unidentified	unidentified	unidentified	unidentified	Ascomycota sp
New.ReferenceOTU2379	0.602443	-0.407105	1.2034	-0.338295	0.735141	NA	Ascomycota	unidentified	unidentified	unidentified	unidentified	uncultured Ascomycota
New.ReferenceOTU2255	0	0	0	0	1	NA	Basidiomycota	Agaricomycetes	Agaricales	Inocybaceae	Inocybe	Inocybe sp
New.ReferenceOTU1991	0.857442	-1.24257	1.14832	-1.08207	0.27922	NA	Basidiomycota	Agaricomycetes	Agaricales	unidentified	unidentified	Agaricales sp
New.ReferenceOTU1994	0.500542	1.49451	1.33429	1.12008	0.26268	NA	Ascomycota	Dothideomycetes	Capnodiales	Teratosphaeriaceae	unidentified	Teratosphaeriaceae sp
New.ReferenceOTU73	0.916862	0.0739608	1.19783	0.0617457	0.950765	NA	Basidiomycota	Agaricomycetes	Agaricales	Psathyrellaceae	unidentified	Psathyrellaceae sp
New.ReferenceOTU1869	0.111316	-0.26404	2.96221	-0.089136	0.928974	NA	Ascomycota	unidentified	unidentified	unidentified	unidentified	uncultured Ascomycota
New.ReferenceOTU1026	0.591874	-2.08656	1.47008	-1.41935	0.155797	NA	Ascomycota	Sordariomycetes	Sordariales	Lasiosphaeriaceae	Cercophora	Cercophora sp
New.ReferenceOTU1602	1.19834	-2.32003	1.49197	-1.55501	0.119944	NA	Ascomycota	Dothideomycetes	Pleosporales	Pleosporaceae	Pyrenophora	Pyrenophora graminea
New.ReferenceOTU1600	0.699609	1.01196	1.93623	0.522644	0.601222	NA	Ascomycota	Dothideomycetes	Dothideales	Dothioraceae	Sydowia	Sydowia sp
New.ReferenceOTU1606	0.221137	-0.236314	1.93159	-0.122342	0.902628	NA	Ascomycota	Dothideomycetes	Dothideales	Dothideaceae	Dothidea	Dothidea sp CanS_64
New.ReferenceOTU1607	0.92654	1.19465	1.27629	0.936039	0.349253	NA	Ascomycota	Dothideomycetes	Pleosporales	Corynesporascaceae	Corynespora	Corynespora proliferata
New.ReferenceOTU1738	0.564409	-0.613087	1.19891	-0.511369	0.609093	NA	Ascomycota	Dothideomycetes	Pleosporales	unidentified	unidentified	Pleosporales sp
New.ReferenceOTU1737	0.520004	0.894476	1.02241	0.874873	0.381643	NA	Ascomycota	Dothideomycetes	unidentified	unidentified	unidentified	Dothideomycetes sp
New.ReferenceOTU92	1.16551	0.288922	0.766361	0.377005	0.70617	NA	Ascomycota	Dothideomycetes	Capnodiales	Davidiellaceae	Cladosporium	Cladosporium fusiforme
New.ReferenceOTU96	1.10216	0.259318	0.987867	0.262503	0.792934	NA	unidentified	unidentified	unidentified	unidentified	unidentified	uncultured fungus
New.ReferenceOTU97	1.09318	-0.404698	1.36275	-0.296972	0.766488	NA	Basidiomycota	Microbotryomycetes	Sporidiobolales	Incertae sedis	Sporobolomyces	Sporobolomyces sp TD49
New.ReferenceOTU498	0.0694885	0.248525	2.96373	0.0838552	0.933172	NA	Ascomycota	Dothideomycetes	Capnodiales	Teratosphaeriaceae	Devriesia	Devriesia hilliana
New.ReferenceOTU1284	1.02752	-0.387862	0.77609	-0.499765	0.617241	NA	Ascomycota	Dothideomycetes	Capnodiales	Teratosphaeriaceae	Catenulostroma	Catenulostroma hermanusense
New.ReferenceOTU1281	0.980266	-0.737716	1.33225	-0.553735	0.57976	NA	Ascomycota	Dothideomycetes	Capnodiales	unidentified	unidentified	Capnodiales sp
New.ReferenceOTU1040	0.436607	-0.724641	1.56484	-0.463078	0.643309	NA	Ascomycota	Dothideomycetes	Pleosporales	Phaeosphaeriaceae	Stagonospora	Stagonospora sp TA26_24
New.ReferenceOTU1043	0.848495	0.338022	0.994274	0.339969	0.73388	NA	Ascomycota	unidentified	unidentified	unidentified	unidentified	Ascomycota sp
New.ReferenceOTU1047	0.0473141	0.420702	2.96394	0.14194	0.887127	NA	unidentified	unidentified	unidentified	unidentified	unidentified	uncultured fungus
New.ReferenceOTU1048	0.164494	-0.711858	2.96086	-0.240423	0.810002	NA	Ascomycota	Eurotiomycetes	Eurotiales	Trichocomaceae	Penicillium	Penicillium christenseniae
New.ReferenceOTU1049	1.07636	-0.46151	0.927814	-0.497416	0.618896	NA	Basidiomycota	Agaricomycetes	Agaricales	Psathyrellaceae	Coprinopsis	Coprinopsis radiata
New.ReferenceOTU1519	0.582333	-0.0256571	1.00368	-0.0255629	0.979606	NA	Ascomycota	Dothideomycetes	Pleosporales	Cucurbitariaceae	Curreya	Curreya sp
New.ReferenceOTU308	0.838722	0.196784	1.45484	0.135262	0.892405	NA	unidentified	unidentified	unidentified	unidentified	unidentified	Fungi sp
New.ReferenceOTU659	0	0	0	0	1	NA	unidentified	unidentified	unidentified	unidentified	unidentified	fungal sp TRN254
New.ReferenceOTU658	0.171722	1.21121	2.59894	0.466039	0.641187	NA	Ascomycota	Sordariomycetes	Xylariales	Diatrypaceae	unidentified	Diatrypaceae sp
New.ReferenceOTU301	0.919872	-1.21343	1.10197	-1.10115	0.270832	NA	Basidiomycota	Agaricomycetes	Agaricales	unidentified	unidentified	Agaricales sp
New.ReferenceOTU300	1.27437	-0.0436492	1.45277	-0.0300455	0.976031	NA	Ascomycota	Lecanoromycetes	Lecanorales	Ramalinaceae	Ramalina	Ramalina pollinaria
New.ReferenceOTU651	0.044354	0.363264	2.96404	0.122557	0.902458	NA	Ascomycota	Dothideomycetes	Capnodiales	Davidiellaceae	Cladosporium	Cladosporium exasperatum
New.ReferenceOTU302	0.337768	1.62472	1.48513	1.094	0.273956	NA	Ascomycota	Lecanoromycetes	Lecanorales	Incertae sedis	Scoliciosporum	Scoliciosporum umbrinum
New.ReferenceOTU1468	0.860784	2.47027	1.4752	1.67453	0.0940261	NA	Basidiomycota	Agaricomycetes	Agaricales	unidentified	unidentified	Agaricales sp
New.ReferenceOTU1469	1.20313	-1.67316	1.06134	-1.57645	0.114921	NA	Ascomycota	unidentified	unidentified	unidentified	unidentified	Ascomycota sp
New.ReferenceOTU2416	0.0503991	-0.607294	2.96236	-0.205003	0.837569	NA	Ascomycota	Dothideomycetes	Myriangiales	unidentified	unidentified	Myriangiales sp
New.ReferenceOTU1197	0.0799454	-0.107017	2.96323	-0.0361151	0.971191	NA	Ascomycota	Eurotiomycetes	Chaetothyriales	Herpotrichiellaceae	Rhinocladiella	Rhinocladiella sp
New.ReferenceOTU472	0.831638	1.70561	1.1203	1.52246	0.127895	NA	Ascomycota	Dothideomycetes	Pleosporales	Phaeosphaeriaceae	Phaeosphaeria	Phaeosphaeria sp
New.ReferenceOTU476	0.0534146	-0.0869277	2.9642	-0.0293258	0.976605	NA	Ascomycota	unidentified	unidentified	unidentified	unidentified	uncultured Pezizomycotina
New.ReferenceOTU474	0.0426556	-0.275904	2.96346	-0.0931019	0.925823	NA	Ascomycota	Leotiomycetes	Helotiales	Incertae sedis	Trimmatostroma	Trimmatostroma salinum
New.ReferenceOTU272	0.0163294	0.0814133	2.96442	0.0274634	0.97809	NA	Ascomycota	Dothideomycetes	Incertae sedis	Incertae sedis	Bactrodesmium	Bactrodesmium gabretae
New.ReferenceOTU275	0.837105	-0.0243131	0.801966	-0.0303169	0.975814	NA	Ascomycota	Dothideomycetes	Dothideales	Dothideaceae	Endoconidioma	Endoconidioma populi
New.ReferenceOTU277	0.115478	0.00537336	2.49166	0.00215653	0.998279	NA	unidentified	unidentified	unidentified	unidentified	unidentified	fungal sp ARIZ AZ1110
New.ReferenceOTU879	0.577205	0.916939	1.20555	0.7606	0.446896	NA	Ascomycota	Sordariomycetes	Xylariales	Amphisphaeriaceae	Pestalotiopsis	Pestalotiopsis sp E_000535668
New.ReferenceOTU878	0.51535	-0.377326	1.22146	-0.308914	0.757387	NA	Basidiomycota	Ustilaginomycetes	Ustilaginales	Ustilaginaceae	Ustilago	Ustilago striiformis
New.ReferenceOTU876	0.652691	2.63104	1.71594	1.5333	0.125203	NA	Basidiomycota	Agaricomycetes	Geastrales	Geastraceae	Geastrum	Geastrum lageniforme
New.ReferenceOTU870	1.22398	0.882971	0.924011	0.955585	0.339282	NA	Basidiomycota	Agaricomycetes	Agaricales	unidentified	unidentified	Agaricales sp
New.ReferenceOTU909	1.23945	-0.10952	0.668502	-0.163829	0.869866	NA	Ascomycota	Lecanoromycetes	Ostropales	Stictidaceae	Schizoxylon	Schizoxylon albescens
New.ReferenceOTU2343	0.596751	-0.143296	1.31909	-0.108633	0.913493	NA	Ascomycota	unidentified	unidentified	unidentified	unidentified	Ascomycota sp
New.ReferenceOTU2344	0.806779	0.728091	1.2391	0.587595	0.556804	NA	Ascomycota	Dothideomycetes	unidentified	unidentified	unidentified	Dothideomycetes sp
New.ReferenceOTU2345	0.435862	0.511112	1.41169	0.362056	0.71731	NA	Ascomycota	Arthoniomycetes	Arthoniales	Chrysothricaceae	Chrysothrix	Chrysothrix sp KWS 23
New.ReferenceOTU2348	1.10094	0.526322	1.05421	0.499255	0.6176	NA	unidentified	unidentified	unidentified	unidentified	unidentified	uncultured fungus
New.ReferenceOTU1983	0.86475	1.5613	1.12683	1.38557	0.165877	NA	Basidiomycota	Agaricomycetes	Agaricales	Lycoperdaceae	unidentified	Lycoperdaceae sp
New.ReferenceOTU1989	0.620813	-1.03633	1.14641	-0.903979	0.366007	NA	Ascomycota	Dothideomycetes	Capnodiales	unidentified	unidentified	Capnodiales sp
New.ReferenceOTU69	0.750007	0.344929	1.24021	0.278122	0.780919	NA	Basidiomycota	Agaricomycetes	Russulales	Stereaceae	Gloeocystidiellum	Gloeocystidiellum sp
New.ReferenceOTU62	0.729407	-0.27726	1.3688	-0.202557	0.839481	NA	Ascomycota	Dothideomycetes	Incertae sedis	Micropeltidaceae	Stomiopeltis	Stomiopeltis sp T49A1c
New.ReferenceOTU1720	0.791622	1.40576	1.14736	1.22521	0.220495	NA	Ascomycota	Eurotiomycetes	Chaetothyriales	Herpotrichiellaceae	Phaeococcomyces	Phaeococcomyces aff nigricans P40D010
New.ReferenceOTU1725	0.0228336	-0.398656	2.96361	-0.134517	0.892994	NA	Ascomycota	Lecanoromycetes	Pertusariales	Pertusariaceae	Pertusaria	Pertusaria aff corallina BRY C56061
New.ReferenceOTU1724	0.55103	0.233259	1.20609	0.193401	0.846645	NA	Ascomycota	Dothideomycetes	Hysteriales	Hysteriaceae	Gloniopsis	Gloniopsis sp MFLUCC 12_0010
New.ReferenceOTU1727	0.0308946	0.0814133	2.96442	0.0274634	0.97809	NA	Ascomycota	unidentified	unidentified	unidentified	unidentified	uncultured Ascomycota
New.ReferenceOTU1726	0.708788	0.442299	0.963957	0.458836	0.646352	NA	Ascomycota	Dothideomycetes	Pleosporales	Pleosporaceae	unidentified	Pleosporaceae sp
New.ReferenceOTU81	0.709723	0.405423	1.82255	0.222448	0.823965	NA	Ascomycota	Lecanoromycetes	Teloschistales	Physciaceae	Physcia	Physcia tribacia
New.ReferenceOTU84	0.406213	-0.832354	1.8688	-0.445396	0.656034	NA	Ascomycota	Dothideomycetes	Pleosporales	Phaeosphaeriaceae	Sclerostagonospora	Sclerostagonospora sp CBS 118224
New.ReferenceOTU1295	0	NA	NA	NA	NA	NA	Basidiomycota	Pucciniomycetes	Pachnocybales	Pachnocybaceae	Pachnocybe	Pachnocybe ferruginea
New.ReferenceOTU1294	0.224366	-1.70831	2.46715	-0.692425	0.48867	NA	Basidiomycota	Tremellomycetes	Tremellales	unidentified	unidentified	Tremellales sp
New.ReferenceOTU484	0.52378	-1.88366	1.59261	-1.18275	0.236907	NA	unidentified	unidentified	unidentified	unidentified	unidentified	fungal sp agrD488
New.ReferenceOTU1051	0.155429	-1.06182	2.66945	-0.397769	0.6908	NA	Ascomycota	Dothideomycetes	Capnodiales	unidentified	unidentified	Capnodiales sp
New.ReferenceOTU1057	0.368502	1.25781	1.35892	0.925593	0.354658	NA	Ascomycota	Incertae sedis	Incertae sedis	Incertae sedis	Radulidium	Radulidium sp
New.ReferenceOTU642	0.993548	1.40384	0.961247	1.46044	0.144169	NA	Ascomycota	Incertae sedis	Incertae sedis	Incertae sedis	Torula	Torula sp
New.ReferenceOTU644	0.321652	0.373662	2.01723	0.185235	0.853045	NA	Ascomycota	Dothideomycetes	Capnodiales	Mycosphaerellaceae	Xenosonderhenia	Xenosonderhenia syzygii
New.ReferenceOTU310	0.736831	-1.16852	1.27545	-0.916164	0.359581	NA	Ascomycota	Dothideomycetes	Capnodiales	Teratosphaeriaceae	unidentified	Teratosphaeriaceae sp
New.ReferenceOTU1479	0.610167	-0.441715	1.37132	-0.32211	0.747369	NA	unidentified	unidentified	unidentified	unidentified	unidentified	fungal sp P1S14
New.ReferenceOTU1477	0.679563	0.164717	1.38259	0.119137	0.905167	NA	Ascomycota	Lecanoromycetes	Lecanorales	Incertae sedis	Scoliciosporum	Scoliciosporum chlorococcum
New.ReferenceOTU1476	0.531932	0.759803	1.23411	0.615669	0.538113	NA	Ascomycota	Eurotiomycetes	Chaetothyriales	Herpotrichiellaceae	Exophiala	Exophiala eucalyptorum
New.ReferenceOTU2401	0.904564	0.0895709	0.912454	0.0981648	0.921801	NA	Basidiomycota	Ustilaginomycetes	Ustilaginales	Ustilaginaceae	Ustilago	Ustilago maydis
New.ReferenceOTU1182	0.605597	-0.547371	1.22498	-0.446841	0.65499	NA	Ascomycota	Lecanoromycetes	Teloschistales	Physciaceae	Physcia	Physcia tribacia
New.ReferenceOTU462	0.437925	-2.22641	2.50878	-0.887449	0.374837	NA	unidentified	unidentified	unidentified	unidentified	unidentified	Fungi sp
New.ReferenceOTU464	0.72932	-2.3033	1.42369	-1.61784	0.105698	NA	Ascomycota	Sordariomycetes	Sordariales	Lasiosphaeriaceae	Podospora	Podospora decipiens
New.ReferenceOTU262	0.963575	0.436687	0.946557	0.461343	0.644553	NA	Ascomycota	Eurotiomycetes	Chaetothyriales	Herpotrichiellaceae	unidentified	Herpotrichiellaceae sp
New.ReferenceOTU868	0.691165	0.69058	1.3191	0.523525	0.600609	NA	Ascomycota	Dothideomycetes	Capnodiales	Mycosphaerellaceae	Ramularia	Ramularia stellenboschensis
New.ReferenceOTU959	0.0108403	0.0814133	2.96442	0.0274634	0.97809	NA	Ascomycota	Lecanoromycetes	Teloschistales	Physciaceae	unidentified	Physciaceae sp KWS 26
New.CleanUp.ReferenceOTU1	0.482058	0.290019	0.989696	0.293038	0.769493	NA	Ascomycota	Dothideomycetes	Dothideales	Dothioraceae	Aureobasidium	Aureobasidium pullulans
New.CleanUp.ReferenceOTU47	0.994704	0.461907	0.766887	0.602314	0.546965	NA	Ascomycota	Eurotiomycetes	Eurotiales	Trichocomaceae	Penicillium	Penicillium oxalicum
New.CleanUp.ReferenceOTU203	0.0344421	-0.0869277	2.9642	-0.0293258	0.976605	NA	Ascomycota	Dothideomycetes	Pleosporales	unidentified	unidentified	Pleosporales sp
New.CleanUp.ReferenceOTU290	0.875284	-0.457406	1.24399	-0.367694	0.713102	NA	Ascomycota	Dothideomycetes	Pleosporales	Pleosporaceae	Bipolaris	Bipolaris brizae
New.CleanUp.ReferenceOTU339	1.01611	-0.540644	0.654806	-0.825655	0.409	NA	Ascomycota	Dothideomycetes	Pleosporales	unidentified	unidentified	Pleosporales sp
New.CleanUp.ReferenceOTU418	1.01045	-0.463516	1.10877	-0.418045	0.675914	NA	Ascomycota	Dothideomycetes	unidentified	unidentified	unidentified	Dothideomycetes sp
New.CleanUp.ReferenceOTU528	0.439807	1.47491	1.37321	1.07406	0.282795	NA	Ascomycota	Dothideomycetes	Pleosporales	Phaeosphaeriaceae	unidentified	Phaeosphaeriaceae sp
New.CleanUp.ReferenceOTU568	0.847757	-0.415404	0.776553	-0.534933	0.592696	NA	Ascomycota	Dothideomycetes	Capnodiales	Davidiellaceae	Cladosporium	Cladosporium exasperatum
New.CleanUp.ReferenceOTU1099	0.752902	-0.269238	0.881981	-0.305265	0.760164	NA	Ascomycota	Dothideomycetes	Capnodiales	Davidiellaceae	Cladosporium	Cladosporium exasperatum
New.CleanUp.ReferenceOTU1178	0.508187	-0.668927	1.44204	-0.463874	0.642738	NA	Ascomycota	Dothideomycetes	Pleosporales	unidentified	unidentified	Pleosporales sp
New.CleanUp.ReferenceOTU1953	0.273883	-0.609446	2.13903	-0.284918	0.775707	NA	Ascomycota	Eurotiomycetes	Chaetothyriales	unidentified	unidentified	Chaetothyriales sp
New.CleanUp.ReferenceOTU2766	0.821024	0.222974	0.853593	0.261218	0.793924	NA	Ascomycota	Dothideomycetes	Pleosporales	Incertae sedis	Didymella	Didymella sp
New.CleanUp.ReferenceOTU3215	0.551361	-1.14167	1.39469	-0.818582	0.413025	NA	Ascomycota	Sordariomycetes	Sordariales	Chaetomiaceae	Chaetomium	Chaetomium sp
New.CleanUp.ReferenceOTU4076	0.144069	0.420702	2.96394	0.14194	0.887127	NA	Ascomycota	Sordariomycetes	Diaporthales	Diaporthaceae	Phomopsis	Phomopsis sp NY7453a
New.CleanUp.ReferenceOTU4823	0.261339	1.03431	2.14091	0.483116	0.629014	NA	unidentified	unidentified	unidentified	unidentified	unidentified	uncultured fungus
New.CleanUp.ReferenceOTU5853	0.540076	-0.237438	1.30228	-0.182325	0.855328	NA	Ascomycota	Dothideomycetes	unidentified	unidentified	unidentified	Dothideomycetes sp
