# Supplementary material for: Effects of agricultural management on phyllosphere fungal diversity in vineyards and the association with adjacent native forests
Source: PeerJ. 2018 Oct 29;6:e5715. doi: 10.7717/peerj.5715 (PMC6211267; doi:10.7717/peerj.5715)
Supplement: Table S2 — This table indicates the taxonomic assignment for each OTU, the F statistic and its P-values, the P-value corrected for multiple comparisons (False Discovery Rare; FDR), and the mean relative abundance of each species in the vineyards and forest. No species showed significantly different abundance between vineyards with different agricultural management. [file peerj-06-5715-s003.xlsx]

## Sheet: ANOVA-Management-Species
Phylum	Class	Order	Family	Genus	Species	Test-Statistic	P-value	FDR P-value	mean relative abundance conventional vineyards	mean relative abundance organic vineyards
Ascomycota	Dothideomycetes	Dothideales	Dothioraceae	Aureobasidium	Aureobasidium pullulans	17.181	0.00021329	0.0921413	0.0358069	0.0988518
Ascomycota	Dothideomycetes	Pleosporales	Pleosporaceae	Bipolaris	Bipolaris melinidis	14.5287	0.000553638	0.119586	9.99714e-05	2.28506e-05
Basidiomycota	Tremellomycetes	Tremellales	Incertae sedis	Cryptococcus	Cryptococcus oeirensis	11.3557	0.00188485	0.271418	2.85633e-06	3.99886e-05
Ascomycota	Sordariomycetes	Xylariales	Diatrypaceae	unidentified	Diatrypaceae sp	8.74082	0.00562204	0.60718	4.85576e-05	0.0002485
Ascomycota	Dothideomycetes	Capnodiales	Incertae sedis	Capnobotryella	Capnobotryella sp	7.52941	0.00962078	0.66138	1.42816e-05	5.99829e-05
Ascomycota	Lecanoromycetes	Lecanorales	Incertae sedis	Scoliciosporum	Scoliciosporum umbrinum	7.37168	0.0103349	0.66138	0	1.99943e-05
Ascomycota	Leotiomycetes	Helotiales	Sclerotiniaceae	Botryotinia	Botryotinia fuckeliana	6.98591	0.0123339	0.66138	0.00176521	0.000965438
Basidiomycota	Cystobasidiomycetes	Erythrobasidiales	Incertae sedis	Erythrobasidium	Erythrobasidium hasegawianum	6.85484	0.0131052	0.66138	3.42759e-05	5.71265e-06
Ascomycota	Sordariomycetes	Diaporthales	Valsaceae	Cytospora	Cytospora austromontana	6.49314	0.0155171	0.66138	2.85633e-05	9.42588e-05
Ascomycota	Dothideomycetes	unidentified	unidentified	unidentified	Dothideomycetes sp	6.41208	0.016121	0.66138	0.00251642	0.00527278
Ascomycota	Dothideomycetes	Capnodiales	Davidiellaceae	Davidiella	Davidiella tassiana	6.03111	0.0193219	0.66138	0.467641	0.378937
Basidiomycota	Agaricomycetes	Agaricales	Lycoperdaceae	unidentified	Lycoperdaceae sp	5.94175	0.0201686	0.66138	5.71265e-06	3.99886e-05
Ascomycota	Dothideomycetes	Botryosphaeriales	Aplosporellaceae	Aplosporella	Aplosporella javeedii	5.35079	0.0268934	0.66138	0.000348472	0
Ascomycota	Lecanoromycetes	Teloschistales	Physciaceae	Physcia	Physcia leptalea	5.28155	0.0278291	0.66138	2.57069e-05	2.85633e-06
Ascomycota	Dothideomycetes	Capnodiales	Mycosphaerellaceae	Mycosphaerella	Mycosphaerella pseudocryptica	4.90891	0.0335172	0.66138	0.000608398	0.00114824
Ascomycota	Dothideomycetes	Capnodiales	Mycosphaerellaceae	Mycosphaerella	Mycosphaerella sp MUCC573	4.85714	0.0344034	0.66138	1.14253e-05	0
Ascomycota	Dothideomycetes	Hysteriales	Hysteriaceae	Gloniopsis	Gloniopsis sp MFLUCC 12_0010	4.62765	0.0386539	0.66138	0.000642674	0.000242788
Ascomycota	Leotiomycetes	Helotiales	Incertae sedis	Glarea	Glarea lozoyensis	4.60846	0.0390345	0.66138	0.000119966	0.000385604
Ascomycota	Dothideomycetes	Pleosporales	Cucurbitariaceae	Pyrenochaetopsis	Pyrenochaetopsis sp	4.59772	0.0392495	0.66138	4.85576e-05	0.000197087
Basidiomycota	Pucciniomycetes	Pucciniales	Uropyxidaceae	Tranzschelia	Tranzschelia discolor	4.55088	0.0402018	0.66138	7.99771e-05	1.7138e-05
Basidiomycota	Tremellomycetes	Tremellales	Incertae sedis	Cryptococcus	Cryptococcus saitoi	4.27848	0.0462714	0.66138	0.000202799	0.0006998
Ascomycota	Dothideomycetes	Dothideales	Dothioraceae	Hormonema	Hormonema sp	3.94539	0.0551089	0.66138	0.00138246	0.00237075
Ascomycota	Sordariomycetes	Coniochaetales	unidentified	unidentified	Coniochaetales sp	3.91705	0.055943	0.66138	8.56898e-06	3.71322e-05
Basidiomycota	Tremellomycetes	Tremellales	Incertae sedis	Cryptococcus	Cryptococcus laurentii	3.88342	0.0569513	0.66138	9.99714e-05	0.000274207
Ascomycota	Dothideomycetes	Pleosporales	Sporormiaceae	Preussia	Preussia sp	3.85929	0.0576872	0.66138	1.14253e-05	4.28449e-05
Basidiomycota	Agaricomycetes	Agaricales	Psathyrellaceae	Coprinellus	Coprinellus sp	3.8144	0.0590841	0.66138	2.85633e-05	0.000131391
Ascomycota	Dothideomycetes	Pleosporales	Incertae sedis	Phoma	Phoma sp A15	3.76923	0.0605283	0.66138	1.99943e-05	0
Basidiomycota	Tremellomycetes	Tremellales	Incertae sedis	Cryptococcus	Cryptococcus magnus	3.76326	0.0607221	0.66138	3.71322e-05	0.000105684
Ascomycota	Dothideomycetes	Capnodiales	Mycosphaerellaceae	Mycosphaerella	Mycosphaerella sp CPC 12200	3.74633	0.0612755	0.66138	2.85633e-05	7.14082e-05
Basidiomycota	Agaricomycetes	Russulales	Peniophoraceae	unidentified	Peniophoraceae sp	3.68675	0.0632678	0.66138	2.85633e-06	1.99943e-05
Ascomycota	Dothideomycetes	Myriangiales	Incertae sedis	Endosporium	Endosporium sp	3.59099	0.066623	0.66138	0	5.42702e-05
Ascomycota	Dothideomycetes	Dothideales	Dothioraceae	Pringsheimia	Pringsheimia sp	3.57849	0.0670753	0.66138	0.000377035	0.00180234
Basidiomycota	Agaricomycetes	Agaricales	Strophariaceae	Gymnopilus	Gymnopilus junonius	3.57511	0.0671984	0.66138	8.56898e-06	2.85633e-05
Ascomycota	Dothideomycetes	Pleosporales	Phaeosphaeriaceae	Sclerostagonospora	Sclerostagonospora sp 87 YS_2010	3.5572	0.0678539	0.66138	0.00013996	0.000337047
Ascomycota	Sordariomycetes	Diaporthales	Incertae sedis	Valsaria	Valsaria ceratoniae	3.5124	0.0695256	0.66138	1.7138e-05	5.99829e-05
unidentified	unidentified	unidentified	unidentified	unidentified	uncultured fungus	3.46475	0.071354	0.66138	0.00125393	0.00184519
Ascomycota	Dothideomycetes	Capnodiales	Mycosphaerellaceae	Mycosphaerella	Mycosphaerella sp KH00254	3.36533	0.0753456	0.66138	0.000514139	0.000259926
Ascomycota	Dothideomycetes	Capnodiales	Incertae sedis	Phaeotheca	Phaeotheca triangularis	3.35968	0.0755797	0.66138	3.71322e-05	8.56898e-06
Ascomycota	Leotiomycetes	Erysiphales	Erysiphaceae	Erysiphe	Erysiphe convolvuli	3.31743	0.0773577	0.66138	5.42702e-05	1.14253e-05
Ascomycota	Dothideomycetes	Capnodiales	unidentified	unidentified	Neodevriesiaceae sp CCFEE 5569	3.31707	0.077373	0.66138	1.42816e-05	2.85633e-06
Ascomycota	Dothideomycetes	Pleosporales	Pleosporaceae	Bipolaris	Bipolaris sp HSAUP074449	3.19165	0.0829355	0.66138	7.99771e-05	8.56898e-06
Ascomycota	Dothideomycetes	Capnodiales	Incertae sedis	Meristemomyces	Meristemomyces frigidus	3.16355	0.0842425	0.66138	1.99943e-05	6.85518e-05
Basidiomycota	Tremellomycetes	Tremellales	Incertae sedis	Cryptococcus	Cryptococcus chernovii	3.14393	0.0851693	0.66138	0.00163382	0.00367038
Ascomycota	unidentified	unidentified	unidentified	unidentified	ascomycete sp MA 4921	3.12538	0.0860558	0.66138	2.57069e-05	0.000294202
Ascomycota	Dothideomycetes	Capnodiales	Davidiellaceae	Cladosporium	Cladosporium exasperatum	3.11119	0.086741	0.66138	0.205696	0.239843
Ascomycota	Dothideomycetes	Hysteriales	Gloniaceae	Cenococcum	uncultured Cenococcum	3.09216	0.0876697	0.66138	5.71265e-06	4.85576e-05
Basidiomycota	Tremellomycetes	Tremellales	Incertae sedis	Cryptococcus	Cryptococcus heimaeyensis	3.07352	0.08859	0.66138	0.000182805	0.000354185
Basidiomycota	Agaricomycetes	Agaricales	Agaricaceae	Calvatia	Calvatia pachydermica	3.0493	0.0898028	0.66138	0.0128992	0.000536989
Ascomycota	Eurotiomycetes	Mycocaliciales	Mycocaliciaceae	Chaenothecopsis	Chaenothecopsis pusilla	3.01418	0.0915942	0.66138	2.57069e-05	6.85518e-05
Basidiomycota	Agaricomycetes	Agaricales	Strophariaceae	Hypholoma	Hypholoma australe	3.00722	0.0919543	0.66138	2.28506e-05	2.85633e-06
Ascomycota	Dothideomycetes	Myriangiales	unidentified	unidentified	Myriangiales sp	2.9772	0.0935249	0.66138	2.57069e-05	6.28392e-05
Basidiomycota	Agaricomycetes	Agaricales	Strophariaceae	Psilocybe	Psilocybe sp	2.95652	0.0946246	0.66138	0	1.14253e-05
Ascomycota	Eurotiomycetes	Chaetothyriales	Herpotrichiellaceae	Capronia	Capronia sp 94006a	2.94063	0.0954794	0.66138	8.56898e-06	4.57012e-05
Ascomycota	Sordariomycetes	Hypocreales	Nectriaceae	Fusarium	Fusarium tricinctum	2.86316	0.0997761	0.66138	3.42759e-05	1.14253e-05
Ascomycota	Sordariomycetes	Xylariales	Amphisphaeriaceae	unidentified	Amphisphaeriaceae sp	2.8482	0.100631	0.66138	6.85518e-05	0.000237075
Basidiomycota	Agaricomycetes	Geastrales	Geastraceae	Geastrum	Geastrum lageniforme	2.843	0.10093	0.66138	0	1.99943e-05
Ascomycota	Dothideomycetes	Pleosporales	Incertae sedis	Phoma	Phoma paspali	2.83724	0.101262	0.66138	3.14196e-05	0
Ascomycota	Leotiomycetes	Helotiales	Dermateaceae	Pezicula	Pezicula sp 3 ICMP 18931	2.83464	0.101413	0.66138	5.71265e-06	5.99829e-05
Ascomycota	Dothideomycetes	Capnodiales	Mycosphaerellaceae	Mycosphaerella	Mycosphaerella arbuticola	2.83344	0.101482	0.66138	0.000277064	8.56898e-05
Ascomycota	Eurotiomycetes	Eurotiales	Trichocomaceae	Aspergillus	Aspergillus sp YM3	2.83333	0.101488	0.66138	0	1.7138e-05
Ascomycota	Dothideomycetes	Pleosporales	Testudinaceae	Lepidosphaeria	Lepidosphaeria nicotiae	2.73115	0.107615	0.66138	2.85633e-05	8.56898e-06
Basidiomycota	Agaricomycetes	Agaricales	Agaricaceae	Mycenastrum	Mycenastrum corium	2.73115	0.107615	0.66138	4.28449e-05	2.28506e-05
Ascomycota	Leotiomycetes	Helotiales	Incertae sedis	Naevala	Naevala sp	2.72	0.108309	0.66138	5.71265e-06	2.85633e-05
Basidiomycota	Ustilaginomycetes	Urocystidales	Glomosporiaceae	Thecaphora	Thecaphora oxytropis	2.68189	0.110719	0.66138	0.000117109	3.99886e-05
Ascomycota	Dothideomycetes	Hysteriales	Hysteriaceae	Hysterium	Hysterium pulicare	2.67639	0.111072	0.66138	8.56898e-06	0.00010854
Basidiomycota	Agaricomycetes	Agaricales	Psathyrellaceae	Parasola	Parasola leiocephala	2.66134	0.112044	0.66138	2.28506e-05	2.85633e-06
Ascomycota	Sordariomycetes	Xylariales	Amphisphaeriaceae	Seimatosporium	Seimatosporium hypericinum	2.65287	0.112596	0.66138	0.000102828	0.000222793
Ascomycota	Lecanoromycetes	Candelariales	Candelariaceae	Candelariella	Candelariella rosulans	2.61538	0.115074	0.66138	8.56898e-06	2.57069e-05
Ascomycota	Sordariomycetes	Xylariales	Diatrypaceae	Diatrypella	Diatrypella sp	2.61538	0.115074	0.66138	1.42816e-05	4.28449e-05
Ascomycota	Dothideomycetes	Botryosphaeriales	Incertae sedis	Homortomyces	Homortomyces combreti	2.60337	0.115881	0.66138	3.42759e-05	9.14025e-05
Ascomycota	Dothideomycetes	Capnodiales	Mycosphaerellaceae	Ramularia	Ramularia sp	2.56	0.118851	0.66138	1.7138e-05	0.00010854
Ascomycota	Sordariomycetes	Diaporthales	Incertae sedis	Harknessia	Harknessia ravenstreetina	2.54536	0.119873	0.66138	0.000297058	0.000159954
Basidiomycota	unidentified	unidentified	unidentified	unidentified	uncultured Basidiomycota	2.51048	0.12235	0.66138	0.000148529	4.57012e-05
Ascomycota	unidentified	unidentified	unidentified	unidentified	melanized limestone ascomycete CR_2004	2.5	0.123106	0.66138	5.71265e-06	3.42759e-05
Basidiomycota	Agaricostilbomycetes	Agaricostilbales	Agaricostilbaceae	Bensingtonia	Bensingtonia sp PYCC 5562	2.47273	0.125098	0.66138	0	2.28506e-05
Basidiomycota	Microbotryomycetes	Sporidiobolales	Incertae sedis	Sporobolomyces	Sporobolomyces ruberrimus	2.46513	0.125659	0.66138	3.14196e-05	7.99771e-05
Ascomycota	Leotiomycetes	Helotiales	Vibrisseaceae	Phialocephala	Phialocephala fluminis	2.45665	0.126289	0.66138	0	1.42816e-05
Ascomycota	Dothideomycetes	Capnodiales	Mycosphaerellaceae	Ramularia	Ramularia stellenboschensis	2.45	0.126786	0.66138	5.71265e-06	4.57012e-05
Ascomycota	Dothideomycetes	Botryosphaeriales	Incertae sedis	Camarosporium	Camarosporium aloes	2.42733	0.128496	0.66138	0.000157098	3.99886e-05
Ascomycota	Saccharomycetes	Saccharomycetales	Saccharomycetaceae	Saccharomyces	Saccharomyces eubayanus	2.41149	0.129708	0.66138	0	9.42588e-05
Ascomycota	Arthoniomycetes	Arthoniales	Chrysothricaceae	Chrysothrix	Chrysothrix sp KWS 23	2.38682	0.13162	0.66138	2.85633e-06	2.28506e-05
Ascomycota	Sordariomycetes	Sordariales	Lasiosphaeriaceae	Podospora	Podospora decipiens	2.38682	0.13162	0.66138	2.28506e-05	2.85633e-06
Ascomycota	Eurotiomycetes	Chaetothyriales	Herpotrichiellaceae	Exophiala	Exophiala xenobiotica	2.36709	0.133174	0.66138	3.14196e-05	0
unidentified	unidentified	unidentified	unidentified	unidentified	fungal sp VKM FW_2422	2.35977	0.133755	0.66138	1.42816e-05	3.42759e-05
Ascomycota	Sordariomycetes	Microascales	Microascaceae	Microascus	Microascus brevicaulis	2.34807	0.134692	0.66138	1.99943e-05	5.71265e-06
Ascomycota	Saccharomycetes	Saccharomycetales	Saccharomycetaceae	Tetrapisispora	Tetrapisispora blattae	2.30508	0.138196	0.66138	1.42816e-05	2.85633e-06
Basidiomycota	Agaricomycetes	Polyporales	Ganodermataceae	Ganoderma	Ganoderma australe	2.24943	0.142893	0.66138	4.85576e-05	0.00019423
Ascomycota	Dothideomycetes	Pleosporales	Pleosporaceae	Pyrenophora	Pyrenophora bromi	2.24391	0.143369	0.66138	0.000151385	0.000394173
Ascomycota	Eurotiomycetes	Chaetothyriales	Herpotrichiellaceae	Exophiala	Exophiala eucalyptorum	2.18988	0.148127	0.66138	0.000214225	0.00050557
Ascomycota	Dothideomycetes	Botryosphaeriales	Botryosphaeriaceae	Lasiodiplodia	Lasiodiplodia rubropurpurea	2.125	0.154088	0.66138	1.14253e-05	0
Ascomycota	Dothideomycetes	Capnodiales	Mycosphaerellaceae	Passalora	Passalora californica	2.125	0.154088	0.66138	0	5.71265e-06
Ascomycota	Eurotiomycetes	Eurotiales	Trichocomaceae	Penicillium	Penicillium sp	2.125	0.154088	0.66138	0	4.57012e-05
Ascomycota	Incertae sedis	Incertae sedis	Incertae sedis	Xenobotrytis	Xenobotrytis acaducospora	2.125	0.154088	0.66138	5.71265e-06	0
Ascomycota	Lecanoromycetes	Rhizocarpales	Catillariaceae	Catillaria	Catillaria nigroclavata	2.125	0.154088	0.66138	0	5.71265e-06
Ascomycota	Leotiomycetes	Helotiales	Dermateaceae	unidentified	Dermateaceae sp	2.125	0.154088	0.66138	0	5.71265e-06
Ascomycota	Sordariomycetes	Diaporthales	Diaporthaceae	Phomopsis	Phomopsis sp NY7453a	2.125	0.154088	0.66138	0	5.71265e-06
Basidiomycota	Agaricomycetes	Polyporales	unidentified	unidentified	Polyporales sp	2.125	0.154088	0.66138	0	5.71265e-06
Basidiomycota	Tremellomycetes	Tremellales	Incertae sedis	Kockovaella	Kockovaella machilophila	2.125	0.154088	0.66138	0	5.71265e-06
Ascomycota	Dothideomycetes	Dothideales	Dothioraceae	Hormonema	Hormonema sp F_054,258	2.1249	0.154098	0.66138	0.000125678	0.000271351
unidentified	unidentified	unidentified	unidentified	unidentified	fungal sp EXP0528F	2.11765	0.154782	0.66138	2.28506e-05	5.71265e-05
Ascomycota	Sordariomycetes	Xylariales	Amphisphaeriaceae	Truncatella	Truncatella spadicea	2.09615	0.15683	0.66138	0.000491288	0.000274207
Basidiomycota	Microbotryomycetes	Microbotryales	Microbotryaceae	Sphacelotheca	Sphacelotheca polygoni_persicariae	2.09589	0.156855	0.66138	1.14253e-05	2.85633e-06
Ascomycota	Saccharomycetes	Saccharomycetales	Incertae sedis	Candida	Candida smithsonii	2.05495	0.160845	0.66138	8.56898e-06	3.99886e-05
Ascomycota	Dothideomycetes	Pleosporales	Pleosporaceae	Curvularia	Curvularia alcornii	2.04417	0.161915	0.66138	7.14082e-05	3.14196e-05
Ascomycota	Sordariomycetes	Diaporthales	Diaporthaceae	Diaporthe	Diaporthe viticola	2.03349	0.162984	0.66138	1.14253e-05	2.57069e-05
Ascomycota	Sordariomycetes	Sordariales	Sordariaceae	Sordaria	Sordaria sp SS_1479	2.00326	0.166056	0.66138	0.000322765	0.000605541
Ascomycota	Dothideomycetes	Pleosporales	Incertae sedis	Berkleasmium	Berkleasmium sp	1.97561	0.168926	0.66138	3.71322e-05	1.14253e-05
Ascomycota	Dothideomycetes	Pleosporales	Phaeosphaeriaceae	Sclerostagonospora	Sclerostagonospora sp	1.97389	0.169106	0.66138	0.000257069	0.000405598
Ascomycota	Dothideomycetes	Capnodiales	unidentified	unidentified	Capnodiales sp M_Camp7	1.96587	0.169951	0.66138	0.000251357	0.000114253
Ascomycota	Incertae sedis	Incertae sedis	Incertae sedis	Radulidium	Radulidium sp	1.95853	0.170729	0.66138	5.71265e-06	1.99943e-05
Ascomycota	Dothideomycetes	Capnodiales	Teratosphaeriaceae	Catenulostroma	Catenulostroma eucalyptorum	1.88889	0.178319	0.66138	0	8.56898e-06
Ascomycota	Eurotiomycetes	Mycocaliciales	Mycocaliciaceae	Chaenothecopsis	Chaenothecopsis resinophila	1.88889	0.178319	0.66138	5.99829e-05	0
Ascomycota	Lecanoromycetes	Lecanorales	Incertae sedis	Solenopsora	Solenopsora holophaea	1.88889	0.178319	0.66138	8.56898e-06	0
Basidiomycota	Ustilaginomycetes	Ustilaginales	Incertae sedis	Farysizyma	Farysizyma setubalensis	1.88889	0.178319	0.66138	0	8.56898e-06
Ascomycota	Dothideomycetes	Capnodiales	Capnodiaceae	Capnodium	Capnodium sp	1.87618	0.179748	0.66138	0.00157669	0.000882605
Ascomycota	Dothideomycetes	Pleosporales	Incertae sedis	Phoma	Phoma sp LF258	1.86383	0.181149	0.66138	3.14196e-05	9.71151e-05
Ascomycota	Saccharomycetes	Saccharomycetales	Incertae sedis	unidentified	Saccharomycetales sp	1.8605	0.181529	0.66138	0.000105684	0
Ascomycota	Eurotiomycetes	Chaetothyriales	Chaetothyriaceae	unidentified	Chaetothyriaceae sp	1.85523	0.182132	0.66138	8.56898e-06	2.85633e-05
Ascomycota	unidentified	unidentified	unidentified	unidentified	uncultured Ascomycota	1.85321	0.182365	0.66138	0.0004513	0.000756927
Basidiomycota	Tremellomycetes	Tremellales	Incertae sedis	unidentified	Tremellales sp	1.83754	0.184176	0.66138	2.57069e-05	9.99714e-05
Basidiomycota	Agaricomycetes	Russulales	unidentified	unidentified	Russulales sp	1.82403	0.185755	0.66138	2.85633e-06	1.7138e-05
Ascomycota	Dothideomycetes	Capnodiales	Teratosphaeriaceae	unidentified	uncultured Teratosphaeriaceae	1.81409	0.186928	0.66138	0.000462725	0.000736932
Ascomycota	Lecanoromycetes	Lecanorales	Ramalinaceae	Ramalina	Ramalina pollinaria	1.79064	0.18973	0.66138	1.14253e-05	3.71322e-05
unidentified	unidentified	unidentified	unidentified	unidentified	fungal sp P1S14	1.78972	0.18984	0.66138	0.000125678	0.000514139
unidentified	unidentified	unidentified	unidentified	unidentified	fungal sp agrD488	1.76623	0.192699	0.661993	1.42816e-05	2.85633e-06
Ascomycota	Lecanoromycetes	Ostropales	Stictidaceae	unidentified	Stictidaceae sp	1.76312	0.193081	0.661993	2.28506e-05	4.85576e-05
Ascomycota	Eurotiomycetes	Chaetothyriales	Incertae sedis	Coniosporium	Coniosporium sp h6	1.74734	0.195037	0.663433	0.000831191	0.000554127
Ascomycota	Dothideomycetes	Capnodiales	Mycosphaerellaceae	Passalora	Passalora zambiae	1.70504	0.200396	0.669391	0	3.71322e-05
Ascomycota	Eurotiomycetes	Chaetothyriales	Herpotrichiellaceae	Phaeomoniella	Phaeomoniella sp	1.69731	0.201396	0.669391	5.71265e-05	0.000117109
Ascomycota	Sordariomycetes	Coniochaetales	Coniochaetaceae	unidentified	Coniochaetaceae sp	1.69699	0.201437	0.669391	2.85633e-06	3.99886e-05
Ascomycota	Dothideomycetes	Pleosporales	Phaeosphaeriaceae	Neostagonospora	Neostagonospora caricis	1.67256	0.204634	0.674825	0.000214225	7.71208e-05
Basidiomycota	Microbotryomycetes	Sporidiobolales	Incertae sedis	Sporobolomyces	Sporobolomyces gracilis	1.63155	0.210142	0.678712	0.00022565	0.00038846
Ascomycota	Dothideomycetes	Dothideales	Dothioraceae	Sydowia	Sydowia japonica	1.62874	0.210526	0.678712	3.99886e-05	1.7138e-05
Ascomycota	Sordariomycetes	Hypocreales	Hypocreaceae	Trichoderma	Trichoderma koningiopsis	1.62874	0.210526	0.678712	1.14253e-05	3.42759e-05
Zygomycota	Incertae sedis	Mortierellales	Mortierellaceae	unidentified	Mortierellaceae sp	1.57467	0.218088	0.687515	1.14253e-05	3.14196e-05
Ascomycota	Eurotiomycetes	Onygenales	Ajellomycetaceae	Ajellomyces	Ajellomyces capsulatus	1.56285	0.219784	0.687515	1.7138e-05	3.71322e-05
Ascomycota	Sordariomycetes	Sordariales	Chaetomiaceae	Chaetomium	Chaetomium sp	1.54779	0.22197	0.687515	9.71151e-05	4.28449e-05
Ascomycota	Sordariomycetes	Xylariales	unidentified	unidentified	Xylariales sp	1.53004	0.224582	0.687515	0.00055984	0.00102256
Ascomycota	Sordariomycetes	Sordariales	unidentified	unidentified	Sordariales sp	1.51246	0.227207	0.687515	1.14253e-05	2.57069e-05
unidentified	unidentified	unidentified	unidentified	unidentified	fungal sp TRN254	1.4872	0.231043	0.687515	7.42645e-05	1.42816e-05
Ascomycota	Dothideomycetes	Capnodiales	Mycosphaerellaceae	Xenosonderhenia	Xenosonderhenia syzygii	1.48084	0.232024	0.687515	5.71265e-06	3.42759e-05
Basidiomycota	Tremellomycetes	Tremellales	Incertae sedis	Cryptococcus	Cryptococcus victoriae	1.48051	0.232074	0.687515	0.00297915	0.00507569
Ascomycota	Lecanoromycetes	Lecanorales	Parmeliaceae	Parmotrema	Parmotrema fistulatum	1.47626	0.232732	0.687515	5.14139e-05	5.71265e-06
Basidiomycota	Agaricomycetes	Agaricales	Agaricaceae	Bovista	Bovista promontorii	1.47059	0.233612	0.687515	1.99943e-05	5.71265e-06
Ascomycota	Sordariomycetes	Incertae sedis	Plectosphaerellaceae	Verticillium	Verticillium dahliae	1.46833	0.233964	0.687515	5.71265e-06	4.85576e-05
Ascomycota	Dothideomycetes	Capnodiales	Teratosphaeriaceae	Catenulostroma	Catenulostroma hermanusense	1.45493	0.236066	0.687515	6.56955e-05	2.28506e-05
Ascomycota	Eurotiomycetes	Eurotiales	Trichocomaceae	Penicillium	Penicillium bialowiezense	1.43158	0.239784	0.687515	2.85633e-06	1.42816e-05
Ascomycota	Dothideomycetes	Pleosporales	Leptosphaeriaceae	Coniothyrium	Coniothyrium carteri	1.42694	0.240532	0.687515	0.000131391	0.000219937
Ascomycota	Lecanoromycetes	Lecanorales	Parmeliaceae	Usnea	Usnea sp F206	1.42617	0.240655	0.687515	3.99886e-05	1.14253e-05
Ascomycota	Taphrinomycetes	Taphrinales	Taphrinaceae	Lalaria	Lalaria carpini	1.42326	0.241127	0.687515	1.42816e-05	3.14196e-05
unidentified	unidentified	unidentified	unidentified	unidentified	fungal sp FF_2011	1.42326	0.241127	0.687515	1.42816e-05	3.14196e-05
Basidiomycota	Microbotryomycetes	Sporidiobolales	Incertae sedis	Rhodotorula	Rhodotorula sp DT3	1.40728	0.243731	0.687515	3.99886e-05	6.85518e-05
Ascomycota	Dothideomycetes	Capnodiales	Mycosphaerellaceae	Mycosphaerella	Mycosphaerella sp L357	1.40367	0.244326	0.687515	2.85633e-06	1.14253e-05
Ascomycota	Dothideomycetes	unidentified	unidentified	unidentified	dothideomycete sp 7683	1.39906	0.245087	0.687515	5.42702e-05	0.000154242
Basidiomycota	Agaricomycetes	Agaricales	Psathyrellaceae	Coprinopsis	Coprinopsis radiata	1.34069	0.254981	0.697195	2.57069e-05	1.14253e-05
unidentified	unidentified	unidentified	unidentified	unidentified	fungal sp ARIZ AZ1110	1.3177	0.259018	0.697195	3.14196e-05	5.71265e-05
Ascomycota	Dothideomycetes	Pleosporales	Sporormiaceae	Sporormiella	Sporormiella irregularis	1.30769	0.260801	0.697195	1.99943e-05	5.71265e-06
Ascomycota	Eurotiomycetes	Eurotiales	Trichocomaceae	Penicillium	Penicillium oxalicum	1.30769	0.260801	0.697195	5.71265e-06	1.99943e-05
Ascomycota	Sordariomycetes	Hypocreales	Hypocreaceae	unidentified	Hypocreaceae sp	1.29943	0.262284	0.697195	5.71265e-05	0.000119966
Ascomycota	Dothideomycetes	Capnodiales	Mycosphaerellaceae	Pseudocercospora	Pseudocercospora sphaerellae_eugeniae	1.28302	0.265263	0.697195	5.71265e-06	1.7138e-05
Ascomycota	Dothideomycetes	Pleosporales	Phaeosphaeriaceae	Phaeosphaeriopsis	Phaeosphaeriopsis nolinae	1.25346	0.27074	0.697195	2.28506e-05	4.57012e-05
Ascomycota	Sordariomycetes	Sordariales	Lasiosphaeriaceae	Cercophora	Cercophora sp	1.24633	0.272082	0.697195	1.7138e-05	2.85633e-06
Ascomycota	Dothideomycetes	Dothideales	Dothioraceae	Aureobasidium	Aureobasidium sp	1.23547	0.274145	0.697195	2.85633e-05	0
Ascomycota	Dothideomycetes	Pleosporales	Phaeosphaeriaceae	Phaeosphaeria	Phaeosphaeria triglochinicola	1.22368	0.276406	0.697195	2.28506e-05	5.42702e-05
Ascomycota	Dothideomycetes	Capnodiales	Capnodiaceae	Capnodium	Capnodium coffeae	1.19746	0.281522	0.697195	0.000322765	0.00055984
Ascomycota	Dothideomycetes	Capnodiales	unidentified	unidentified	Capnodiales sp	1.19391	0.282224	0.697195	0.00147672	0.00195373
Basidiomycota	Agaricomycetes	Atheliales	Atheliaceae	unidentified	Atheliaceae sp	1.19298	0.282408	0.697195	3.42759e-05	0
Ascomycota	Dothideomycetes	Capnodiales	Mycosphaerellaceae	Phaeothecoidea	Phaeothecoidea melaleuca	1.16683	0.287658	0.697195	3.71322e-05	2.85633e-06
Ascomycota	Saccharomycetes	Saccharomycetales	Incertae sedis	Candida	Candida fennica	1.11805	0.297793	0.697195	5.42702e-05	0
Ascomycota	Pezizomycetes	Pezizales	Pyronemataceae	Pyronema	Pyronema sp GSL5_6_2	1.11475	0.298496	0.697195	1.14253e-05	2.28506e-05
Ascomycota	Eurotiomycetes	Eurotiales	Trichocomaceae	Penicillium	Penicillium brevicompactum	1.10448	0.300697	0.697195	0.00160526	5.14139e-05
Ascomycota	Dothideomycetes	Incertae sedis	Incertae sedis	Phaeosclera	Phaeosclera sp	1.10119	0.301408	0.697195	1.7138e-05	5.42702e-05
Ascomycota	Sordariomycetes	Hypocreales	Nectriaceae	Fusarium	Fusarium sp	1.09657	0.302408	0.697195	0.000448443	0.00870323
Ascomycota	Dothideomycetes	Capnodiales	Teratosphaeriaceae	Teratosphaeria	Teratosphaeria knoxdavesii	1.07035	0.308169	0.697195	0.000159954	0.000239931
Ascomycota	unidentified	unidentified	unidentified	unidentified	Ascomycota sp AR_2010	1.06811	0.308669	0.697195	0.0002485	0.000157098
Ascomycota	Saccharomycetes	Saccharomycetales	Saccharomycodaceae	Hanseniaspora	Hanseniaspora uvarum	1.06463	0.309446	0.697195	0.000999714	1.14253e-05
Ascomycota	Dothideomycetes	Pleosporales	Phaeosphaeriaceae	Stagonospora	Stagonospora pseudovitensis	1.05517	0.311572	0.697195	1.14253e-05	2.85633e-06
Ascomycota	unidentified	unidentified	unidentified	unidentified	ascomycete sp IZ_962	1.04954	0.312847	0.697195	0.000159954	0.00010854
Basidiomycota	Agaricomycetes	Agaricales	Psathyrellaceae	Coprinellus	Coprinellus curtus	1.04239	0.314476	0.697195	2.85633e-05	5.42702e-05
unidentified	unidentified	unidentified	unidentified	unidentified	uncultured ectomycorrhizal fungus	1.02906	0.317545	0.697195	2.28506e-05	8.56898e-06
Ascomycota	Dothideomycetes	Capnodiales	Mycosphaerellaceae	Mycosphaerella	Mycosphaerella sp 5 ICMP 18846	1.02256	0.319056	0.697195	8.56898e-06	1.99943e-05
Basidiomycota	Tremellomycetes	Tremellales	Incertae sedis	Dioszegia	Dioszegia zsoltii var. yunnanensis	1.02256	0.319056	0.697195	8.56898e-06	1.99943e-05
Ascomycota	Dothideomycetes	Capnodiales	Capnodiaceae	Capnodium	Capnodium citri	1.01419	0.321015	0.697195	0.000354185	0.000174236
Basidiomycota	Agaricomycetes	Polyporales	Ganodermataceae	Ganoderma	Ganoderma resinaceum	1.01073	0.321829	0.697195	5.42702e-05	8.85461e-05
Ascomycota	Dothideomycetes	Pleosporales	Pleosporaceae	Ulocladium	Ulocladium chartarum	1.00509	0.323163	0.697195	0.000628392	0.000748358
Ascomycota	Dothideomycetes	Capnodiales	Capnodiaceae	Capnodium	Capnodium sp FF_2011	1	0.324375	0.697195	0	2.85633e-06
Ascomycota	Dothideomycetes	Capnodiales	Teratosphaeriaceae	Devriesia	Devriesia hilliana	1	0.324375	0.697195	0	2.85633e-06
Ascomycota	Dothideomycetes	Pleosporales	Montagnulaceae	Paraconiothyrium	Paraconiothyrium sp NO237	1	0.324375	0.697195	0	2.85633e-06
Ascomycota	Dothideomycetes	Pleosporales	Pleosporaceae	Alternaria	Alternaria helianthiinficiens	1	0.324375	0.697195	2.28506e-05	0
Ascomycota	Incertae sedis	Incertae sedis	Incertae sedis	Vermispora	Vermispora spermatophaga	1	0.324375	0.697195	0	4.28449e-05
Ascomycota	Lecanoromycetes	Pertusariales	Pertusariaceae	Pertusaria	Pertusaria aff corallina BRY C56061	1	0.324375	0.697195	2.85633e-06	0
Ascomycota	Lecanoromycetes	Teloschistales	Physciaceae	Hyperphyscia	Hyperphyscia adglutinata	1	0.324375	0.697195	1.42816e-05	0
Ascomycota	Leotiomycetes	Helotiales	Incertae sedis	Trimmatostroma	Trimmatostroma salinum	1	0.324375	0.697195	8.56898e-06	0
Ascomycota	Saccharomycetes	Saccharomycetales	Incertae sedis	Debaryomyces	Debaryomyces nepalensis	1	0.324375	0.697195	1.42816e-05	0
Ascomycota	Taphrinomycetes	Taphrinales	Taphrinaceae	unidentified	Taphrinaceae sp	1	0.324375	0.697195	0	1.42816e-05
Basidiomycota	Agaricomycetes	Agaricales	Inocybaceae	Inocybe	Inocybe sp	1	0.324375	0.697195	0	8.56898e-06
Basidiomycota	Agaricostilbomycetes	Agaricostilbales	Agaricostilbaceae	Bensingtonia	Bensingtonia miscanthi	1	0.324375	0.697195	0	2.85633e-06
Basidiomycota	Agaricostilbomycetes	Agaricostilbales	Agaricostilbaceae	Bensingtonia	Bensingtonia phyllada	1	0.324375	0.697195	0	5.71265e-06
Basidiomycota	Cystobasidiomycetes	Erythrobasidiales	unidentified	unidentified	uncultured Erythrobasidiales	1	0.324375	0.697195	0	2.85633e-06
Basidiomycota	Tremellomycetes	Tremellales	Incertae sedis	Cryptococcus	Cryptococcus sp CBS 12710	1	0.324375	0.697195	2.85633e-06	0
Ascomycota	Eurotiomycetes	Eurotiales	Trichocomaceae	Aspergillus	Aspergillus sydowii	0.997223	0.325038	0.697195	2.85633e-06	3.99886e-05
Basidiomycota	Agaricomycetes	Agaricales	Psathyrellaceae	Coprinopsis	Coprinopsis phlyctidospora	0.991796	0.326339	0.697195	5.71265e-06	5.14139e-05
Ascomycota	unidentified	unidentified	unidentified	unidentified	Ascomycota sp	0.986494	0.327617	0.697195	0.00379035	0.00507284
Ascomycota	Dothideomycetes	Dothideales	Dothioraceae	Sydowia	Sydowia sp	0.955744	0.335167	0.709765	0.000119966	0.000245644
Ascomycota	Dothideomycetes	Capnodiales	Mycosphaerellaceae	unidentified	Mycosphaerellaceae sp	0.931507	0.341287	0.711391	5.14139e-05	8.56898e-05
Ascomycota	Dothideomycetes	Pleosporales	Incertae sedis	Phoma	Phoma sp	0.927766	0.342245	0.711391	0.000271351	0.000377035
Ascomycota	Dothideomycetes	Myriangiales	Myriangiaceae	Myriangium	Myriangium sp UFMG_BRO197	0.921909	0.343753	0.711391	2.57069e-05	1.14253e-05
Basidiomycota	Agaricostilbomycetes	Agaricostilbales	Agaricostilbaceae	Bensingtonia	Bensingtonia sp PYCC 5566	0.920442	0.344132	0.711391	5.71265e-06	2.57069e-05
Basidiomycota	Tremellomycetes	Tremellales	Incertae sedis	Cryptococcus	Cryptococcus dimennae	0.918919	0.344526	0.711391	2.57069e-05	4.28449e-05
Ascomycota	Dothideomycetes	Capnodiales	Davidiellaceae	Cladosporium	Cladosporium fusiforme	0.907904	0.347396	0.711391	0.000165667	0.000208512
Basidiomycota	Exobasidiomycetes	Microstromatales	Quambalariaceae	Quambalaria	Quambalaria cyanescens	0.907655	0.347462	0.711391	0.000137104	5.71265e-05
Basidiomycota	Tremellomycetes	Cystofilobasidiales	Cystofilobasidiaceae	Udeniomyces	Udeniomyces pyricola	0.889691	0.352216	0.716692	0.000268495	0.000399886
Basidiomycota	Agaricomycetes	Agaricales	Agaricaceae	Coprinus	Coprinus comatus	0.885385	0.353369	0.716692	8.56898e-06	5.71265e-05
Ascomycota	Eurotiomycetes	Chaetothyriales	Herpotrichiellaceae	Phaeomoniella	Phaeomoniella niveniae	0.829268	0.368895	0.736475	6.85518e-05	0.000102828
Ascomycota	Dothideomycetes	Incertae sedis	Micropeltidaceae	Stomiopeltis	Stomiopeltis sp RS52	0.826748	0.369615	0.736475	1.7138e-05	3.99886e-05
Ascomycota	Dothideomycetes	Pleosporales	Pleosporaceae	Pyrenophora	Pyrenophora graminea	0.825493	0.369974	0.736475	3.71322e-05	1.42816e-05
Basidiomycota	Tremellomycetes	Tremellales	Incertae sedis	Cryptococcus	Cryptococcus wieringae	0.822502	0.370833	0.736475	8.85461e-05	0.000125678
Ascomycota	unidentified	unidentified	unidentified	unidentified	ascomycete sp MA 4905	0.819672	0.371647	0.736475	3.14196e-05	2.85633e-06
Ascomycota	Dothideomycetes	Myriangiales	Elsinoaceae	unidentified	Elsinoaceae sp ZLY_2010b	0.804734	0.37599	0.741679	1.99943e-05	8.56898e-06
Ascomycota	Dothideomycetes	Dothideales	unidentified	unidentified	Dothideales sp	0.790059	0.380328	0.743757	0.000679806	0.000928306
Ascomycota	Lecanoromycetes	Teloschistales	Teloschistaceae	Teloschistes	Teloschistes chrysophthalmus	0.780612	0.383159	0.743757	2.28506e-05	3.99886e-05
Ascomycota	Incertae sedis	Incertae sedis	Incertae sedis	Knufia	Knufia sp	0.779817	0.383399	0.743757	3.14196e-05	1.7138e-05
Basidiomycota	Agaricomycetes	Agaricales	Psathyrellaceae	Coprinellus	Coprinellus micaceus	0.772727	0.385545	0.743757	5.71265e-06	1.14253e-05
Ascomycota	Dothideomycetes	Pleosporales	Montagnulaceae	Paraconiothyrium	Paraconiothyrium hawaiiense	0.772376	0.385652	0.743757	0.000165667	0.000222793
Ascomycota	Dothideomycetes	Capnodiales	Incertae sedis	Rachicladosporium	Rachicladosporium sp DoF1	0.758384	0.389942	0.748689	0.000705513	0.00092545
Basidiomycota	Agaricomycetes	Russulales	Peniophoraceae	Dendrophora	Dendrophora sp	0.746341	0.393691	0.752542	5.71265e-06	1.42816e-05
unidentified	unidentified	unidentified	unidentified	unidentified	Fungi sp	0.728455	0.399358	0.760011	0.00186804	0.00115681
Ascomycota	Lecanoromycetes	Candelariales	Candelariaceae	Candelaria	Candelaria pacifica	0.705069	0.406951	0.771066	2.28506e-05	5.71265e-06
Ascomycota	Sordariomycetes	Xylariales	Amphisphaeriaceae	Phlogicylindrium	Phlogicylindrium eucalyptorum	0.693878	0.410662	0.774699	2.85633e-06	8.56898e-06
Basidiomycota	Agaricomycetes	Agaricales	Psathyrellaceae	Coprinopsis	Coprinopsis atramentaria	0.672527	0.417884	0.784895	3.71322e-05	5.42702e-05
Ascomycota	Dothideomycetes	Capnodiales	Incertae sedis	Arthrocatena	Arthrocatena tenebrio	0.665919	0.420159	0.785751	0.000254213	0.000342759
Ascomycota	Lecanoromycetes	Teloschistales	Physciaceae	Physcia	Physcia tribacia	0.65168	0.425124	0.791611	5.42702e-05	2.85633e-05
Ascomycota	Sordariomycetes	Xylariales	Amphisphaeriaceae	Truncatella	Truncatella angustata	0.639963	0.429279	0.795916	0.000319909	0.000445587
Basidiomycota	Agaricomycetes	Boletales	Suillaceae	Suillus	Suillus pseudobrevipes	0.615385	0.438199	0.808983	1.99943e-05	3.14196e-05
Basidiomycota	Microbotryomycetes	Sporidiobolales	Incertae sedis	Rhodotorula	Rhodotorula armeniaca	0.59159	0.447115	0.811856	8.85461e-05	0.000122822
Basidiomycota	Agaricomycetes	Agaricales	Psathyrellaceae	Coprinellus	Coprinellus impatiens	0.586207	0.449172	0.811856	1.7138e-05	2.57069e-05
Ascomycota	Dothideomycetes	Pleosporales	Montagnulaceae	Paraphaeosphaeria	Paraphaeosphaeria michotii	0.584806	0.44971	0.811856	5.42702e-05	8.85461e-05
Basidiomycota	Agaricomycetes	Agaricales	unidentified	unidentified	Agaricales sp	0.58134	0.451045	0.811856	0.000705513	0.000579834
Ascomycota	unidentified	unidentified	unidentified	unidentified	ascomycete sp MA 4907	0.580394	0.45141	0.811856	0.00110825	0.000776921
Ascomycota	Dothideomycetes	Pleosporales	Pleosporaceae	Alternaria	Alternaria eichhorniae	0.568911	0.455885	0.811856	0.0237446	0.0218652
Ascomycota	Saccharomycetes	Saccharomycetales	Metschnikowiaceae	Metschnikowia	Metschnikowia chrysoperlae	0.568861	0.455904	0.811856	0.0213139	0.00641817
Ascomycota	Dothideomycetes	Pleosporales	Pleosporaceae	Pleospora	Pleospora herbarum	0.562916	0.458249	0.811856	0.0187118	0.016858
Ascomycota	Eurotiomycetes	Chaetothyriales	Herpotrichiellaceae	Phaeococcomyces	Phaeococcomyces mexicanus	0.556111	0.460956	0.811856	6.56955e-05	9.99714e-05
Ascomycota	Dothideomycetes	Capnodiales	Incertae sedis	Toxicocladosporium	Toxicocladosporium leucadendri	0.553883	0.461848	0.811856	0.0012625	0.000896887
Basidiomycota	Tremellomycetes	Tremellales	Incertae sedis	Cryptococcus	Cryptococcus sp CBS 8358	0.552347	0.462465	0.811856	1.42816e-05	5.71265e-06
Ascomycota	Dothideomycetes	Incertae sedis	Incertae sedis	Asteromella	Asteromella sp	0.548387	0.464061	0.811856	1.14253e-05	2.28506e-05
Ascomycota	Dothideomycetes	Pleosporales	Phaeosphaeriaceae	unidentified	Phaeosphaeriaceae sp	0.538935	0.467907	0.811856	0.000322765	0.000422736
Ascomycota	Dothideomycetes	Pleosporales	Cucurbitariaceae	Curreya	Curreya austroafricana	0.535939	0.469137	0.811856	2.28506e-05	3.71322e-05
Basidiomycota	Tremellomycetes	Tremellales	Incertae sedis	Cryptococcus	Cryptococcus aureus	0.53125	0.471073	0.811856	2.28506e-05	3.42759e-05
Ascomycota	Leotiomycetes	Rhytismatales	Rhytismataceae	Lophodermium	Lophodermium sp 0705HL2	0.529412	0.471835	0.811856	1.14253e-05	2.85633e-06
Basidiomycota	Agaricomycetes	Corticiales	Corticiaceae	unidentified	uncultured Sistotrema	0.529412	0.471835	0.811856	1.14253e-05	2.85633e-06
Ascomycota	Dothideomycetes	Pleosporales	Pleosporaceae	Bipolaris	Bipolaris brizae	0.511278	0.479468	0.811856	0.000125678	7.99771e-05
Ascomycota	Dothideomycetes	Capnodiales	Incertae sedis	Rachicladosporium	Rachicladosporium americanum	0.51	0.480013	0.811856	0.000119966	6.85518e-05
Glomeromycota	Glomeromycetes	Glomerales	Glomeraceae	unidentified	Glomeraceae sp	0.509026	0.48043	0.811856	0.000536989	0.000425593
Ascomycota	Dothideomycetes	Pleosporales	Sporormiaceae	unidentified	Sporormiaceae sp	0.507555	0.48106	0.811856	0.00313339	0.00386175
Ascomycota	Sordariomycetes	Hypocreales	Nectriaceae	unidentified	Nectriaceae sp	0.507463	0.4811	0.811856	9.42588e-05	6.56955e-05
Ascomycota	Leotiomycetes	Helotiales	Incertae sedis	Chlorencoelia	Chlorencoelia torta	0.488818	0.489211	0.822331	1.42816e-05	5.71265e-06
Ascomycota	Dothideomycetes	Pleosporales	Sporormiaceae	Preussia	Preussia flanaganii	0.470769	0.497286	0.829999	2.28506e-05	1.42816e-05
Ascomycota	Sordariomycetes	Sordariales	Sordariaceae	Neurospora	Neurospora crassa	0.465753	0.499571	0.829999	1.42816e-05	8.56898e-06
Ascomycota	Leotiomycetes	Erysiphales	Erysiphaceae	Erysiphe	Erysiphe betae	0.464164	0.500299	0.829999	3.14196e-05	1.99943e-05
Ascomycota	Dothideomycetes	Pleosporales	unidentified	unidentified	Pleosporales sp GS3_3_5	0.459459	0.502464	0.829999	8.56898e-06	1.7138e-05
Basidiomycota	Agaricomycetes	Agaricales	Agaricaceae	Coprinus	Coprinus foetidellus	0.457481	0.503379	0.829999	1.14253e-05	2.57069e-05
Basidiomycota	Ustilaginomycetes	Ustilaginales	Ustilaginaceae	Ustilago	Ustilago maydis	0.443708	0.509833	0.837444	0.00416738	0.00508997
Ascomycota	Incertae sedis	Incertae sedis	Incertae sedis	Torula	Torula sp	0.437299	0.512886	0.839267	3.71322e-05	4.85576e-05
Ascomycota	Dothideomycetes	Pleosporales	Sporormiaceae	Sporormiella	Sporormiella australis	0.429727	0.516534	0.839464	4.28449e-05	2.85633e-05
Ascomycota	Eurotiomycetes	Chaetothyriales	Herpotrichiellaceae	unidentified	uncultured Herpotrichiellaceae	0.425858	0.518416	0.839464	0.000437018	0.000585547
Basidiomycota	Pucciniomycetes	Pucciniales	Incertae sedis	Aecidium	Aecidium sp PUR 43011	0.425	0.518836	0.839464	1.14253e-05	5.71265e-06
Basidiomycota	Agaricomycetes	Agaricales	Agaricaceae	Bovista	Bovista paludosa	0.417126	0.52271	0.839961	7.99771e-05	5.99829e-05
Ascomycota	Leotiomycetes	Helotiales	Helotiaceae	unidentified	Helotiaceae sp	0.413374	0.524575	0.839961	3.14196e-05	1.99943e-05
Ascomycota	Dothideomycetes	Pleosporales	Incertae sedis	Phoma	Phoma puncteliae	0.409836	0.526344	0.839961	0.000111397	0.000154242
Ascomycota	Lecanoromycetes	Teloschistales	Physciaceae	unidentified	Physciaceae sp KWS 26	0.4	0.53132	0.839961	8.56898e-06	2.85633e-06
Basidiomycota	Tremellomycetes	Tremellales	unidentified	unidentified	uncultured Tremellales	0.4	0.53132	0.839961	8.56898e-06	2.85633e-06
Ascomycota	Sordariomycetes	Hypocreales	Incertae sedis	Stachybotrys	Stachybotrys chartarum	0.397403	0.532648	0.839961	1.99943e-05	1.14253e-05
Ascomycota	Sordariomycetes	Xylariales	Amphisphaeriaceae	Pestalotiopsis	Pestalotiopsis sp HC02	0.397198	0.532753	0.839961	0.000882605	0.00111682
Ascomycota	Dothideomycetes	Pleosporales	Cucurbitariaceae	Curreya	Curreya sp	0.377254	0.543165	0.851257	5.71265e-05	7.99771e-05
Ascomycota	Dothideomycetes	Botryosphaeriales	Botryosphaeriaceae	Diplodia	Diplodia subglobosa	0.372875	0.545502	0.851257	0.000159954	0.000122822
Ascomycota	Dothideomycetes	Pleosporales	Incertae sedis	Periconia	Periconia sp CY191	0.371179	0.546412	0.851257	3.71322e-05	5.14139e-05
Ascomycota	Dothideomycetes	Pleosporales	Pleosporaceae	Embellisia	Embellisia planifunda	0.368604	0.5478	0.851257	3.99886e-05	5.42702e-05
Ascomycota	Dothideomycetes	Dothideales	Dothideaceae	Endoconidioma	Endoconidioma populi	0.355621	0.554899	0.851428	0.0173865	0.020457
Ascomycota	Sordariomycetes	unidentified	unidentified	unidentified	Sordariomycetes sp	0.351019	0.557457	0.851428	0.000428449	0.000499857
unidentified	unidentified	unidentified	unidentified	unidentified	fungal sp TRN256	0.350014	0.558019	0.851428	0.000157098	0.000191374
Ascomycota	Eurotiomycetes	Chaetothyriales	Herpotrichiellaceae	Rhinocladiella	Rhinocladiella sp	0.346939	0.559745	0.851428	2.85633e-06	5.71265e-06
Ascomycota	Sordariomycetes	Hypocreales	unidentified	unidentified	Hypocreales sp	0.346939	0.559745	0.851428	2.85633e-06	5.71265e-06
Ascomycota	Sordariomycetes	unidentified	unidentified	unidentified	Sordariomycetes sp MX17	0.342569	0.562215	0.851428	2.57069e-05	3.71322e-05
Ascomycota	Dothideomycetes	Pleosporales	Massarinaceae	unidentified	uncultured Saccharicola	0.34	0.563677	0.851428	3.42759e-05	2.28506e-05
Ascomycota	Sordariomycetes	Xylariales	Diatrypaceae	Eutypella	Eutypella sp MS_2011_F20	0.34	0.563677	0.851428	1.14253e-05	1.7138e-05
Ascomycota	Sordariomycetes	Xylariales	Xylariaceae	unidentified	Xylariales sp M71	0.331707	0.568448	0.85183	9.71151e-05	7.42645e-05
Ascomycota	Dothideomycetes	Pleosporales	unidentified	unidentified	fungal endophyte WMS23	0.328545	0.570289	0.85183	0.000439874	0.000259926
Ascomycota	Dothideomycetes	Pleosporales	Incertae sedis	Periconia	Periconia sp	0.326886	0.571259	0.85183	0.000274207	0.000237075
Ascomycota	Dothideomycetes	Patellariales	Patellariaceae	Rhytidhysteron	Rhytidhysteron sp	0.322778	0.573676	0.85183	0.000271351	0.000222793
Ascomycota	Dothideomycetes	Capnodiales	Mycosphaerellaceae	Septoria	Septoria cretae	0.311927	0.58016	0.85183	1.42816e-05	8.56898e-06
Basidiomycota	Microbotryomycetes	Sporidiobolales	Incertae sedis	Sporobolomyces	Sporobolomyces elongatus	0.311927	0.58016	0.85183	8.56898e-06	1.42816e-05
Basidiomycota	Tremellomycetes	Tremellales	unidentified	unidentified	Tremellales sp	0.311927	0.58016	0.85183	8.56898e-06	1.42816e-05
Basidiomycota	Tremellomycetes	Tremellales	unidentified	unidentified	Tremellales sp PNB099A	0.311927	0.58016	0.85183	8.56898e-06	1.42816e-05
Ascomycota	Dothideomycetes	Pleosporales	Leptosphaeriaceae	Plenodomus	Plenodomus enteroleucus	0.309403	0.581689	0.85183	3.14196e-05	1.42816e-05
Ascomycota	Dothideomycetes	Pleosporales	Pleosporaceae	Bipolaris	Bipolaris cynodontis	0.305618	0.583998	0.852322	4.28449e-05	5.42702e-05
Ascomycota	Dothideomycetes	Pleosporales	Phaeosphaeriaceae	Sclerostagonospora	Sclerostagonospora sp CBS 118224	0.295938	0.58999	0.857866	3.14196e-05	2.28506e-05
Ascomycota	Dothideomycetes	Botryosphaeriales	unidentified	unidentified	uncultured Botryosphaeriales	0.293103	0.591769	0.857866	5.71265e-06	1.14253e-05
Ascomycota	Dothideomycetes	Capnodiales	Mycosphaerellaceae	Phaeothecoidea	Phaeothecoidea sp NO235a	0.285714	0.596458	0.860307	4.28449e-05	5.99829e-05
Ascomycota	Dothideomycetes	Capnodiales	Davidiellaceae	Cladosporium	Cladosporium sphaerospermum	0.279015	0.600779	0.860307	0.00225935	0.0027535
Ascomycota	Dothideomycetes	Pleosporales	Lophiostomataceae	Lophiostoma	Lophiostoma sp DMW2181	0.278689	0.600991	0.860307	2.57069e-05	1.7138e-05
Basidiomycota	Ustilaginomycetes	Ustilaginales	Ustilaginaceae	Ustilago	Ustilago echinata	0.276986	0.6021	0.860307	4.85576e-05	3.71322e-05
Ascomycota	Dothideomycetes	Myriangiales	Elsinoaceae	unidentified	Elsinoaceae sp KNUC262	0.272	0.605374	0.860307	1.42816e-05	1.99943e-05
Ascomycota	Lecanoromycetes	Peltigerales	Pannariaceae	Degelia	Degelia plumbea	0.267717	0.608218	0.860307	1.42816e-05	8.56898e-06
Ascomycota	Lecanoromycetes	Ostropales	Stictidaceae	Glomerobolus	Glomerobolus gelineus	0.267519	0.60835	0.860307	0.000159954	0.000205656
Ascomycota	Dothideomycetes	Pleosporales	Corynesporascaceae	Corynespora	Corynespora proliferata	0.261634	0.612306	0.860307	0.000125678	8.85461e-05
Basidiomycota	Tremellomycetes	Tremellales	Incertae sedis	Cryptococcus	Cryptococcus phenolicus	0.261538	0.612371	0.860307	1.7138e-05	2.28506e-05
Ascomycota	Dothideomycetes	Dothideales	Dothioraceae	unidentified	Dothioraceae sp	0.26007	0.613367	0.860307	0.00122822	0.0014453
Ascomycota	Dothideomycetes	Pleosporales	Pleosporaceae	Drechslera	Drechslera poae	0.254576	0.617126	0.862778	1.14253e-05	1.99943e-05
Ascomycota	Sordariomycetes	Hypocreales	Incertae sedis	Acremonium	Acremonium alternatum	0.25	0.620296	0.864412	1.14253e-05	1.7138e-05
Ascomycota	Eurotiomycetes	Eurotiales	Trichocomaceae	Talaromyces	Talaromyces amestolkiae	0.237762	0.628957	0.867037	1.99943e-05	1.42816e-05
Ascomycota	Dothideomycetes	Capnodiales	Teratosphaeriaceae	unidentified	Teratosphaeriaceae sp	0.237033	0.629481	0.867037	0.0002485	0.000291345
Ascomycota	Pezizomycetes	Pezizales	Sarcosomataceae	Strumella	Strumella sp olrim138	0.234483	0.631324	0.867037	3.42759e-05	2.28506e-05
Ascomycota	Lecanoromycetes	Ostropales	unidentified	unidentified	Ostropales sp s056	0.232877	0.632492	0.867037	1.7138e-05	2.57069e-05
Ascomycota	Dothideomycetes	Incertae sedis	Micropeltidaceae	Stomiopeltis	Stomiopeltis sp T49A1c	0.230508	0.634222	0.867037	2.28506e-05	1.14253e-05
Ascomycota	Lecanoromycetes	Teloschistales	Teloschistaceae	Eilifdahlia	Eilifdahlia dahlii	0.230508	0.634222	0.867037	2.28506e-05	1.14253e-05
Ascomycota	unidentified	unidentified	unidentified	unidentified	uncultured Pezizomycotina	0.225166	0.638166	0.869186	7.71208e-05	5.99829e-05
Basidiomycota	Ustilaginomycetes	Ustilaginales	unidentified	unidentified	Ustilaginales sp	0.222951	0.639817	0.869186	4.57012e-05	3.42759e-05
Ascomycota	Dothideomycetes	Pleosporales	Pleosporaceae	Chalastospora	Chalastospora ellipsoidea	0.211912	0.648203	0.870657	0.0023936	0.00255641
Ascomycota	Dothideomycetes	Pleosporales	Pleosporaceae	Curvularia	Curvularia inaequalis	0.21118	0.648769	0.870657	1.42816e-05	1.99943e-05
Basidiomycota	Agaricomycetes	Russulales	Stereaceae	Gloeocystidiellum	Gloeocystidiellum sp	0.21118	0.648769	0.870657	1.42816e-05	1.99943e-05
Ascomycota	Dothideomycetes	Pleosporales	Incertae sedis	Didymella	Didymella sp	0.210931	0.648962	0.870657	0.0434819	0.0471751
Ascomycota	Leotiomycetes	Helotiales	Rutstroemiaceae	Lambertella	Lambertella corni_maris	0.207014	0.65201	0.872038	5.42702e-05	3.99886e-05
Ascomycota	Sordariomycetes	Incertae sedis	Incertae sedis	Cryptovalsa	Cryptovalsa rabenhorstii	0.19348	0.662819	0.881015	7.42645e-05	9.99714e-05
Ascomycota	Dothideomycetes	Dothideales	Dothideaceae	Dothidea	Dothidea insculpta	0.191623	0.664338	0.881015	0.000105684	6.85518e-05
Ascomycota	Eurotiomycetes	Chaetothyriales	Herpotrichiellaceae	Capronia	Capronia peltigerae	0.191011	0.66484	0.881015	1.7138e-05	2.57069e-05
Ascomycota	Dothideomycetes	Pleosporales	Phaeosphaeriaceae	Phaeosphaeria	Phaeosphaeria padellana	0.183926	0.670726	0.882301	4.28449e-05	6.28392e-05
Ascomycota	Dothideomycetes	Pleosporales	Pleosporaceae	Lewia	Lewia infectoria	0.182543	0.671891	0.882301	0.016918	0.0159897
Ascomycota	Sordariomycetes	Sordariales	Lasiosphaeriaceae	unidentified	Lasiosphaeriaceae sp	0.181546	0.672733	0.882301	3.14196e-05	4.57012e-05
Ascomycota	Dothideomycetes	Capnodiales	Mycosphaerellaceae	Phaeothecoidea	Phaeothecoidea minutispora	0.174458	0.678806	0.882301	3.14196e-05	2.28506e-05
Basidiomycota	Microbotryomycetes	Sporidiobolales	Incertae sedis	Sporobolomyces	Sporobolomyces sp TD49	0.172589	0.680431	0.882301	1.99943e-05	1.42816e-05
Basidiomycota	Microbotryomycetes	Sporidiobolales	Incertae sedis	Sporobolomyces	Sporobolomyces sp JCM 11360	0.171311	0.681549	0.882301	0.00161097	0.00195373
Ascomycota	Dothideomycetes	Pleosporales	Phaeosphaeriaceae	Phaeosphaeria	Phaeosphaeria sp	0.168584	0.68395	0.882301	5.71265e-05	7.14082e-05
Ascomycota	Dothideomycetes	Pleosporales	Pleosporaceae	Alternaria	Alternaria alternata	0.168317	0.684186	0.882301	1.14253e-05	8.56898e-06
Ascomycota	Eurotiomycetes	Eurotiales	Trichocomaceae	Aspergillus	Aspergillus tubingensis	0.165854	0.686376	0.882301	1.99943e-05	2.57069e-05
Ascomycota	Incertae sedis	Incertae sedis	Incertae sedis	Knufia	Knufia sp FH_2012	0.165854	0.686376	0.882301	1.99943e-05	2.57069e-05
unidentified	unidentified	unidentified	unidentified	unidentified	fungal endophyte	0.163265	0.688698	0.882301	3.71322e-05	4.85576e-05
Ascomycota	Sordariomycetes	Sordariales	Chaetomiaceae	Humicola	Humicola grisea var. grisea	0.158523	0.693009	0.882301	6.85518e-05	5.42702e-05
Ascomycota	Eurotiomycetes	Chaetothyriales	Herpotrichiellaceae	unidentified	Herpotrichiellaceae sp	0.156277	0.695077	0.882301	8.28335e-05	5.99829e-05
Ascomycota	Dothideomycetes	Pleosporales	Dothidotthiaceae	Spencermartinsia	Spencermartinsia rosulata	0.152712	0.698395	0.882301	0.00188232	0.00157669
Ascomycota	Dothideomycetes	Pleosporales	Lophiostomataceae	Lophiostoma	Lophiostoma arundinis	0.151758	0.69929	0.882301	0.000157098	0.000137104
Ascomycota	Dothideomycetes	Pleosporales	Phaeosphaeriaceae	Stagonospora	Stagonospora sp TA26_24	0.150442	0.700531	0.882301	5.71265e-06	8.56898e-06
Basidiomycota	Tremellomycetes	unidentified	unidentified	unidentified	uncultured Cryptococcus	0.150442	0.700531	0.882301	8.56898e-06	5.71265e-06
Basidiomycota	Agaricomycetes	Agaricales	Psathyrellaceae	Coprinellus	Coprinellus eurysporus	0.146703	0.70409	0.884206	7.99771e-05	9.42588e-05
Ascomycota	Sordariomycetes	Xylariales	Amphisphaeriaceae	Pestalotiopsis	Pestalotiopsis sp E_000535668	0.124088	0.726817	0.909218	8.56898e-06	1.14253e-05
Basidiomycota	unidentified	unidentified	unidentified	unidentified	Basidiomycota sp	0.122765	0.728216	0.909218	0.009006	0.00987432
Ascomycota	Sordariomycetes	Hypocreales	Nectriaceae	Fusarium	Fusarium proliferatum	0.111475	0.740521	0.91768	3.14196e-05	3.71322e-05
Ascomycota	Lecanoromycetes	Ostropales	Stictidaceae	Schizoxylon	Schizoxylon albescens	0.10828	0.744129	0.91768	2.85633e-05	2.28506e-05
Basidiomycota	Microbotryomycetes	Sporidiobolales	Incertae sedis	Sporobolomyces	Sporobolomyces coprosmae	0.107068	0.745513	0.91768	3.14196e-05	3.99886e-05
Ascomycota	Dothideomycetes	Pleosporales	Pleosporaceae	Stemphylium	Stemphylium loti	0.106543	0.746116	0.91768	0.000102828	8.85461e-05
Ascomycota	Leotiomycetes	Erysiphales	Erysiphaceae	Erysiphe	Erysiphe necator	0.105236	0.747622	0.91768	0.0346044	0.0280177
Ascomycota	Incertae sedis	Incertae sedis	Incertae sedis	Xenoconiothyrium	Xenoconiothyrium catenata	0.102719	0.750552	0.91768	1.99943e-05	2.57069e-05
Basidiomycota	Ustilaginomycetes	Ustilaginales	Ustilaginaceae	Sporisorium	Sporisorium puellare	0.101341	0.752173	0.91768	0.000102828	9.14025e-05
Ascomycota	Dothideomycetes	Capnodiales	Teratosphaeriaceae	Devriesia	Devriesia fraseriae	0.100925	0.752666	0.91768	0.000868323	0.000756927
Basidiomycota	Microbotryomycetes	Sporidiobolales	Incertae sedis	Rhodotorula	Rhodotorula nothofagi	0.0997067	0.754112	0.91768	1.99943e-05	1.42816e-05
Basidiomycota	Ustilaginomycetes	Ustilaginales	Ustilaginaceae	unidentified	Ustilaginaceae sp	0.0964054	0.758082	0.91992	0.00145387	0.00133962
Basidiomycota	Tremellomycetes	Tremellales	Incertae sedis	Bullera	Bullera dendrophila	0.0876289	0.769014	0.930572	1.7138e-05	1.14253e-05
Ascomycota	Dothideomycetes	Pleosporales	Montagnulaceae	Paraconiothyrium	Paraconiothyrium africanum	0.0780847	0.781603	0.943163	0.00205941	0.0018509
Ascomycota	Dothideomycetes	Capnodiales	Incertae sedis	Toxicocladosporium	Toxicocladosporium banksiae	0.0705394	0.792157	0.949499	6.85518e-05	5.99829e-05
Ascomycota	Dothideomycetes	Capnodiales	Teratosphaeriaceae	Teratosphaeria	Teratosphaeria capensis	0.0693878	0.79382	0.949499	8.56898e-06	1.14253e-05
Basidiomycota	Ustilaginomycetes	Ustilaginales	Ustilaginaceae	Ustilago	Ustilago striiformis	0.0693878	0.79382	0.949499	1.14253e-05	8.56898e-06
Basidiomycota	Agaricostilbomycetes	unidentified	unidentified	unidentified	Agaricostilbomycetes sp	0.0681363	0.795645	0.949499	4.28449e-05	4.85576e-05
Ascomycota	Sordariomycetes	Hypocreales	Incertae sedis	Acremonium	Acremonium implicatum	0.0641509	0.801577	0.95216	1.42816e-05	1.14253e-05
Ascomycota	Dothideomycetes	Pleosporales	Pleosporaceae	Pyrenophora	Pyrenophora avenae	0.0624745	0.804131	0.95216	5.42702e-05	6.28392e-05
Ascomycota	Dothideomycetes	Incertae sedis	Incertae sedis	Scleroconidioma	Scleroconidioma sphagnicola	0.0610413	0.806343	0.95216	1.42816e-05	1.99943e-05
Basidiomycota	Exobasidiomycetes	Tilletiales	Tilletiaceae	Tilletia	Tilletia controversa	0.0602357	0.807599	0.95216	0.000262782	0.000282776
Basidiomycota	Agaricomycetes	Boletales	Suillaceae	Suillus	Suillus granulatus	0.0580205	0.811099	0.95216	1.99943e-05	1.7138e-05
Basidiomycota	Tremellomycetes	Tremellales	Incertae sedis	Cryptococcus	Cryptococcus adeliensis	0.0580205	0.811099	0.95216	1.99943e-05	1.7138e-05
Ascomycota	Eurotiomycetes	Eurotiales	Trichocomaceae	Penicillium	Penicillium sp HK80	0.0564784	0.813577	0.952481	3.99886e-05	4.57012e-05
Ascomycota	Sordariomycetes	Lulworthiales	Lulworthiaceae	Zalerion	Zalerion arboricola	0.0523883	0.82033	0.954568	3.71322e-05	4.28449e-05
Ascomycota	Eurotiomycetes	Chaetothyriales	Herpotrichiellaceae	Exophiala	Exophiala sp	0.0516717	0.821541	0.954568	1.99943e-05	1.7138e-05
Ascomycota	Sordariomycetes	Xylariales	Xylariaceae	Barrmaelia	Barrmaelia macrospora	0.0514081	0.821989	0.954568	0.000188518	0.000211368
Ascomycota	Lecanoromycetes	Lecanorales	Incertae sedis	Scoliciosporum	Scoliciosporum chlorococcum	0.0465753	0.830423	0.961777	1.99943e-05	1.7138e-05
Ascomycota	Eurotiomycetes	Chaetothyriales	Herpotrichiellaceae	Phaeococcomyces	Phaeococcomyces aff nigricans P40D010	0.0414513	0.839883	0.967691	0.000368466	0.000325621
Ascomycota	Dothideomycetes	Pleosporales	Pleosporaceae	Curvularia	Curvularia spicifera	0.0413849	0.840009	0.967691	6.28392e-05	7.14082e-05
Chytridiomycota	unidentified	unidentified	unidentified	unidentified	uncultured Chytridiomycota	0.0382022	0.846201	0.972231	1.99943e-05	2.28506e-05
Ascomycota	Dothideomycetes	Pleosporales	Leptosphaeriaceae	Leptosphaeria	Leptosphaeria sp	0.0350515	0.8526	0.976985	2.85633e-05	2.57069e-05
unidentified	unidentified	unidentified	unidentified	unidentified	fungal sp TRN499	0.0265211	0.871598	0.996112	3.42759e-05	3.71322e-05
Basidiomycota	Agaricomycetes	Agaricales	Psathyrellaceae	unidentified	Psathyrellaceae sp	0.0242511	0.877169	0.998152	2.57069e-05	2.28506e-05
Ascomycota	Lecanoromycetes	Ostropales	Stictidaceae	Ostropa	Ostropa barbara	0.0238429	0.878198	0.998152	3.42759e-05	3.71322e-05
Ascomycota	Dothideomycetes	Pleosporales	Sporormiaceae	Preussia	Preussia tetramera	0.021118	0.885316	0.998152	1.99943e-05	2.28506e-05
Ascomycota	Eurotiomycetes	Eurotiales	Trichocomaceae	Penicillium	Penicillium spinulosum	0.021118	0.885316	0.998152	3.71322e-05	3.99886e-05
Ascomycota	Dothideomycetes	Pleosporales	Sporormiaceae	unidentified	Preussia sp BLE35	0.0204628	0.887097	0.998152	0.000142816	0.000134247
Ascomycota	unidentified	unidentified	unidentified	unidentified	ascomycete sp IZ_1147	0.0204082	0.887246	0.998152	3.42759e-05	3.14196e-05
Ascomycota	Dothideomycetes	Pleosporales	unidentified	unidentified	Pleosporales sp	0.0163844	0.898902	1	0.0141988	0.0138246
Ascomycota	Lecanoromycetes	Baeomycetales	Baeomycetaceae	Ainoa	Ainoa geochroa	0.015165	0.902716	1	4.57012e-05	4.28449e-05
Ascomycota	Dothideomycetes	Pleosporales	Pleosporaceae	Alternaria	Alternaria leptinellae	0.0148737	0.903651	1	0.000245644	0.00022565
Basidiomycota	Tremellomycetes	unidentified	unidentified	unidentified	Tremellomycetes sp	0.010244	0.919976	1	7.71208e-05	8.28335e-05
Ascomycota	Sordariomycetes	Hypocreales	Incertae sedis	Sarocladium	Sarocladium zeae	0.00901857	0.924899	1	7.42645e-05	7.14082e-05
Ascomycota	Eurotiomycetes	Chaetothyriales	unidentified	unidentified	Chaetothyriales sp	0.00881692	0.925741	1	0.000259926	0.000268495
Ascomycota	Dothideomycetes	Pleosporales	Pleosporaceae	Alternaria	Alternaria solani	0.00769579	0.930609	1	3.99886e-05	3.71322e-05
Ascomycota	Lecanoromycetes	unidentified	unidentified	unidentified	Lecanoromycetes sp	0.0060177	0.938622	1	7.42645e-05	7.71208e-05
Ascomycota	Dothideomycetes	Botryosphaeriales	Botryosphaeriaceae	Dothiorella	Dothiorella vidmadera	0.00572782	0.940115	1	0.000791203	0.000814053
Ascomycota	Dothideomycetes	Pleosporales	Pleosporaceae	Pyrenophora	Pyrenophora lolii	0.00500442	0.944018	1	7.42645e-05	7.14082e-05
Ascomycota	Sordariomycetes	Incertae sedis	Incertae sedis	Cryptovalsa	Cryptovalsa ampelina	0.0047111	0.94568	1	0.000208512	0.000202799
Basidiomycota	Tremellomycetes	Tremellales	Incertae sedis	Cryptococcus	Cryptococcus sp	0.0013161	0.971273	1	0.000245644	0.0002485
Ascomycota	Dothideomycetes	Pleosporales	Pleosporaceae	unidentified	Pleosporaceae sp	0.00121525	0.972395	1	0.00106541	0.00107684
Ascomycota	Dothideomycetes	Capnodiales	Mycosphaerellaceae	Pseudocercospora	Pseudocercospora opuntia	0	1	1	2.85633e-06	2.85633e-06
Ascomycota	Dothideomycetes	Capnodiales	Mycosphaerellaceae	unidentified	uncultured Mycosphaerellaceae	5.3489e-31	1	1	0.000188518	0.000188518
Ascomycota	Dothideomycetes	Dothideales	Dothideaceae	Dothidea	Dothidea sp CanS_64	0	1	1	1.14253e-05	1.14253e-05
Ascomycota	Dothideomycetes	Pleosporales	Cucurbitariaceae	Pyrenochaetopsis	Pyrenochaetopsis microspora	0	1	1	5.14139e-05	5.14139e-05
Ascomycota	Dothideomycetes	Pleosporales	unidentified	unidentified	Pleosporales sp MUT 4397	0	1	1	2.85633e-06	2.85633e-06
Ascomycota	Dothideomycetes	Venturiales	Venturiaceae	Venturia	Venturia pyrina	0	1	1	5.71265e-06	5.71265e-06
Ascomycota	Eurotiomycetes	Chaetothyriales	unidentified	unidentified	Chaetothyriales sp MSX 47445	3.51759e-31	1	1	7.99771e-05	7.99771e-05
Ascomycota	Eurotiomycetes	Eurotiales	Trichocomaceae	Aspergillus	Aspergillus amstelodami	5.81631e-31	1	1	3.14196e-05	3.14196e-05
Ascomycota	Eurotiomycetes	Eurotiales	Trichocomaceae	Penicillium	Penicillium christenseniae	0	1	1	2.85633e-06	2.85633e-06
Ascomycota	Incertae sedis	Incertae sedis	Incertae sedis	Liberomyces	Liberomyces sp	0	1	1	5.71265e-06	5.71265e-06
Ascomycota	Incertae sedis	Incertae sedis	Pseudeurotiaceae	unidentified	Pseudeurotiaceae sp	0	1	1	2.85633e-06	2.85633e-06
Ascomycota	Lecanoromycetes	Agyriales	Agyriaceae	Trapeliopsis	Trapeliopsis californica	0	1	1	2.85633e-06	2.85633e-06
Ascomycota	Leotiomycetes	Helotiales	Incertae sedis	Phacidiella	Phacidiella eucalypti	3.10644e-31	1	1	3.99886e-05	3.99886e-05
Ascomycota	Sordariomycetes	Coniochaetales	Coniochaetaceae	Coniochaeta	Coniochaeta sp	0	1	1	1.7138e-05	1.7138e-05
Ascomycota	Sordariomycetes	Trichosphaeriales	Incertae sedis	unidentified	Trichosphaeriales sp	1.37865e-30	1	1	3.14196e-05	3.14196e-05
Ascomycota	Sordariomycetes	Xylariales	Diatrypaceae	Diatrype	Diatrype sp FPT_5	0	1	1	1.14253e-05	1.14253e-05
Basidiomycota	Exobasidiomycetes	Exobasidiales	Exobasidiaceae	Exobasidium	Exobasidium yoshinagae	0	1	1	8.56898e-06	8.56898e-06
Basidiomycota	Microbotryomycetes	Sporidiobolales	Incertae sedis	Rhodotorula	Rhodotorula aurantiaca	7.48401e-31	1	1	0.000122822	0.000122822
Basidiomycota	Ustilaginomycetes	Ustilaginales	Ustilaginaceae	Ustilago	Ustilago filiformis	5.30625e-31	1	1	0.000134247	0.000134247
Ascomycota	Dothideomycetes	Capnodiales	Davidiellaceae	Cladosporium	Cladosporium pseudiridis	nan	nan	1	0	0
Ascomycota	Dothideomycetes	Capnodiales	Mycosphaerellaceae	Pseudocercospora	Pseudocercospora sphaerulinae	nan	nan	1	0	0
Ascomycota	Dothideomycetes	Capnodiales	Mycosphaerellaceae	Septoria	cf Septoria sp CBS 134910	nan	nan	1	0	0
Ascomycota	Dothideomycetes	Incertae sedis	Incertae sedis	Bactrodesmium	Bactrodesmium gabretae	nan	nan	1	0	0
Ascomycota	Dothideomycetes	Incertae sedis	Micropeltidaceae	Stomiopeltis	Stomiopeltis sp T36A1b	nan	nan	1	0	0
Ascomycota	Eurotiomycetes	Chaetothyriales	Herpotrichiellaceae	Capronia	Capronia sp	nan	nan	1	0	0
Ascomycota	Eurotiomycetes	Pyrenulales	Massariaceae	Massaria	Massaria pyri	nan	nan	1	0	0
Ascomycota	Orbiliomycetes	unidentified	unidentified	unidentified	Orbiliomycetes sp	nan	nan	1	0	0
Ascomycota	Sordariomycetes	Hypocreales	Incertae sedis	Acremonium	Acremonium sp	nan	nan	1	0	0
Basidiomycota	Agaricomycetes	Auriculariales	Incertae sedis	Elmerina	Elmerina holophaea	nan	nan	1	0	0
Basidiomycota	Exobasidiomycetes	Exobasidiales	Exobasidiaceae	Exobasidium	Exobasidium formosanum	nan	nan	1	0	0
Basidiomycota	Microbotryomycetes	Sporidiobolales	Incertae sedis	Rhodotorula	Rhodotorula acheniorum	nan	nan	1	0	0
Basidiomycota	Pucciniomycetes	Pachnocybales	Pachnocybaceae	Pachnocybe	Pachnocybe ferruginea	nan	nan	1	0	0
Basidiomycota	Pucciniomycetes	Septobasidiales	Septobasidiaceae	Septobasidium	Septobasidium carestianum	nan	nan	1	0	0
Basidiomycota	Tremellomycetes	Tremellales	Incertae sedis	Trimorphomyces	Trimorphomyces papilionaceus	nan	nan	1	0	0
unidentified	unidentified	unidentified	unidentified	unidentified	fungal sp FG7	nan	nan	1	0	0
