# Supplementary material for: Effects of agricultural management on phyllosphere fungal diversity in vineyards and the association with adjacent native forests
Source: PeerJ. 2018 Oct 29;6:e5715. doi: 10.7717/peerj.5715 (PMC6211267; doi:10.7717/peerj.5715)
Supplement: Table S3 — This table indicates the OTU identity, the normalized mean between groups, the log2 fold change and its standard error, the Wald statistics and their P-values, the P-value corrected for multiple comparisons (False Discovery Rare; FDR), and the taxonomic assignment from phylum to species. Green rows indicate OTUs that were significantly more abundant in vine leaves and purple rows indicate OTUs that were significantly more abundant in grape berries. [file peerj-06-5715-s004.xlsx]

## Sheet: SuppMat-ITS_DESeq_Tissue_OTUs
OTU	Normalized mean	Log2 Fold Change	LFC SE	Wald statistic	P-value	FDR P-value	Phylum	Class	Order	Family	Genus	Species
New.ReferenceOTU1927	17.0974	1.99433	0.319812	6.23597	4.48998e-10	> 0.0001	Ascomycota	Dothideomycetes	Pleosporales	Phaeosphaeriaceae	unidentified	Phaeosphaeriaceae sp
New.ReferenceOTU70	30891.2	-1.42414	0.253678	-5.61395	1.97758e-08	> 0.0001	Ascomycota	Dothideomycetes	Capnodiales	Davidiellaceae	Davidiella	Davidiella tassiana
New.ReferenceOTU680	22.0214	-1.80385	0.326665	-5.522	3.35159e-08	> 0.0001	Ascomycota	Dothideomycetes	Capnodiales	Davidiellaceae	Davidiella	Davidiella tassiana
New.ReferenceOTU2019	8.21322	2.15189	0.442698	4.86086	1.16879e-06	0.000113404	Ascomycota	Dothideomycetes	Pleosporales	Leptosphaeriaceae	Coniothyrium	Coniothyrium carteri
New.ReferenceOTU57	29.0802	-1.26731	0.261304	-4.84996	1.23489e-06	0.000113404	Ascomycota	Dothideomycetes	Capnodiales	Davidiellaceae	Cladosporium	Cladosporium exasperatum
New.CleanUp.ReferenceOTU4349	126.549	-1.1092	0.226622	-4.8945	9.8558e-07	0.000113404	Ascomycota	Dothideomycetes	Capnodiales	Davidiellaceae	Davidiella	Davidiella tassiana
New.ReferenceOTU413	159.568	-1.12078	0.235439	-4.76036	1.93243e-06	0.000128022	Ascomycota	Dothideomycetes	Capnodiales	Davidiellaceae	Cladosporium	Cladosporium exasperatum
New.ReferenceOTU1900	327.492	-4.48763	0.94437	-4.75198	2.01435e-06	0.000128022	Ascomycota	Saccharomycetes	Saccharomycetales	Metschnikowiaceae	Metschnikowia	Metschnikowia chrysoperlae
New.ReferenceOTU1554	30.6192	-1.20672	0.254345	-4.74441	2.0911e-06	0.000128022	Ascomycota	Dothideomycetes	Capnodiales	Davidiellaceae	Cladosporium	Cladosporium exasperatum
New.ReferenceOTU34	38.806	1.6645	0.357484	4.65614	3.22186e-06	0.000177525	Ascomycota	Dothideomycetes	Capnodiales	Teratosphaeriaceae	Devriesia	Devriesia fraseriae
New.ReferenceOTU1438	14405.7	-0.936684	0.207756	-4.50858	6.52627e-06	0.000326907	Ascomycota	Dothideomycetes	Capnodiales	Davidiellaceae	Cladosporium	Cladosporium exasperatum
New.ReferenceOTU2499	38.2033	1.48981	0.336273	4.43036	9.4076e-06	0.000431966	Ascomycota	unidentified	unidentified	unidentified	unidentified	Ascomycota sp
New.ReferenceOTU711	36.3986	1.5806	0.358358	4.41066	1.03056e-05	0.000436801	Ascomycota	Sordariomycetes	Xylariales	Amphisphaeriaceae	Pestalotiopsis	Pestalotiopsis sp HC02
New.ReferenceOTU1803	5.73646	1.58928	0.367622	4.32312	1.53836e-05	0.000605456	Ascomycota	Dothideomycetes	Pleosporales	Montagnulaceae	Paraconiothyrium	Paraconiothyrium hawaiiense
New.ReferenceOTU2323	4.26812	3.4437	0.838176	4.10857	3.98125e-05	0.00146245	unidentified	unidentified	unidentified	unidentified	unidentified	Fungi sp
New.ReferenceOTU2049	160.961	-1.46324	0.36329	-4.02776	5.63117e-05	0.00182516	Ascomycota	Dothideomycetes	Capnodiales	Davidiellaceae	Cladosporium	Cladosporium sphaerospermum
New.ReferenceOTU1527	1.71678	2.75738	0.682463	4.04034	5.33743e-05	0.00182516	Ascomycota	unidentified	unidentified	unidentified	unidentified	Ascomycota sp
New.ReferenceOTU1608	1749.07	2.80517	0.700607	4.00392	6.23011e-05	0.00190711	Ascomycota	Leotiomycetes	Erysiphales	Erysiphaceae	Erysiphe	Erysiphe necator
New.ReferenceOTU1424	38.8824	1.26993	0.323423	3.92653	8.61791e-05	0.00237423	Ascomycota	Dothideomycetes	Botryosphaeriales	Botryosphaeriaceae	Dothiorella	Dothiorella vidmadera
New.ReferenceOTU803	21.6035	2.02995	0.515459	3.93814	8.21152e-05	0.00237423	Ascomycota	Dothideomycetes	Hysteriales	Hysteriaceae	Gloniopsis	Gloniopsis sp MFLUCC 12_0010
New.ReferenceOTU483	34.0388	1.25725	0.322382	3.89986	9.62476e-05	0.00252535	Ascomycota	Eurotiomycetes	Chaetothyriales	Incertae sedis	Coniosporium	Coniosporium sp h6
New.ReferenceOTU983	94.1098	1.2544	0.324568	3.86482	0.000111172	0.00278435	Ascomycota	Dothideomycetes	Pleosporales	Montagnulaceae	Paraconiothyrium	Paraconiothyrium africanum
New.ReferenceOTU1880	37.3244	1.00181	0.260023	3.85276	0.000116796	0.00279802	Ascomycota	Dothideomycetes	Capnodiales	Mycosphaerellaceae	Mycosphaerella	Mycosphaerella pseudocryptica
New.ReferenceOTU295	39.4772	1.05343	0.275552	3.82297	0.000131856	0.0030272	Ascomycota	Dothideomycetes	Capnodiales	unidentified	unidentified	Capnodiales sp
New.ReferenceOTU1280	9.95669	1.64968	0.436642	3.77811	0.000158022	0.00334884	Ascomycota	unidentified	unidentified	unidentified	unidentified	Ascomycota sp AR_2010
New.ReferenceOTU1616	40.3831	1.2342	0.326115	3.78456	0.000153981	0.00334884	Ascomycota	Dothideomycetes	Capnodiales	Incertae sedis	Rachicladosporium	Rachicladosporium sp DoF1
New.ReferenceOTU1138	18.3138	1.57723	0.423053	3.7282	0.000192853	0.0036608	Ascomycota	Dothideomycetes	Capnodiales	Mycosphaerellaceae	Mycosphaerella	Mycosphaerella sp KH00254
New.ReferenceOTU2064	13.537	1.73641	0.465954	3.72657	0.0001941	0.0036608	Basidiomycota	Microbotryomycetes	Sporidiobolales	Incertae sedis	Sporobolomyces	Sporobolomyces gracilis
New.ReferenceOTU820	1.26054	2.92945	0.787512	3.71988	0.000199317	0.0036608	Ascomycota	Dothideomycetes	Pleosporales	unidentified	unidentified	Pleosporales sp
New.ReferenceOTU2158	16.933	-0.946089	0.253593	-3.73074	0.000190917	0.0036608	Ascomycota	Dothideomycetes	Capnodiales	Davidiellaceae	Cladosporium	Cladosporium exasperatum
New.ReferenceOTU1772	9.84226	-1.0824	0.293419	-3.68891	0.000225221	0.00392856	Ascomycota	Dothideomycetes	Capnodiales	Davidiellaceae	Cladosporium	Cladosporium exasperatum
New.ReferenceOTU1854	5.81283	2.0318	0.551279	3.68561	0.000228156	0.00392856	Basidiomycota	Microbotryomycetes	Sporidiobolales	Incertae sedis	Rhodotorula	Rhodotorula aurantiaca
New.ReferenceOTU1578	18.2744	1.83963	0.500729	3.6739	0.000238872	0.00395945	Ascomycota	Sordariomycetes	Xylariales	Amphisphaeriaceae	Truncatella	Truncatella angustata
New.ReferenceOTU1376	2.37117	3.23098	0.880822	3.66814	0.000244322	0.00395945	unidentified	unidentified	unidentified	unidentified	unidentified	Fungi sp
New.ReferenceOTU1346	14.7199	1.45404	0.398359	3.65008	0.000262161	0.00412716	Glomeromycota	Glomeromycetes	Glomerales	Glomeraceae	unidentified	Glomeraceae sp
New.ReferenceOTU1940	1.68867	2.95891	0.813359	3.63789	0.000274879	0.00420718	Ascomycota	unidentified	unidentified	unidentified	unidentified	Ascomycota sp
New.ReferenceOTU1829	1.58676	2.8602	0.788694	3.6265	0.000287289	0.00427827	Ascomycota	Sordariomycetes	Diaporthales	Incertae sedis	Valsaria	Valsaria ceratoniae
New.ReferenceOTU2421	10.0613	1.60116	0.444189	3.60468	0.000312542	0.00453187	Ascomycota	Dothideomycetes	Capnodiales	Teratosphaeriaceae	unidentified	Teratosphaeriaceae sp
New.ReferenceOTU2304	18.1665	-1.88217	0.533088	-3.53069	0.000414478	0.00570943	unidentified	unidentified	unidentified	unidentified	unidentified	uncultured fungus
New.ReferenceOTU1001	13.4923	1.35216	0.382849	3.53184	0.000412684	0.00570943	Ascomycota	unidentified	unidentified	unidentified	unidentified	Ascomycota sp
New.ReferenceOTU744	8.22114	1.71966	0.491063	3.50192	0.000461914	0.00620767	Ascomycota	Dothideomycetes	Pleosporales	unidentified	unidentified	Pleosporales sp
New.ReferenceOTU1257	13.3894	1.93567	0.556675	3.47721	0.00050666	0.0066469	Ascomycota	Dothideomycetes	Pleosporales	unidentified	unidentified	Pleosporales sp
New.ReferenceOTU2098	6.77918	-1.46737	0.426591	-3.43975	0.000582252	0.00746095	Ascomycota	Dothideomycetes	Capnodiales	Davidiellaceae	Cladosporium	Cladosporium fusiforme
New.ReferenceOTU71	2.23933	3.94339	1.14909	3.43176	0.000599679	0.00750962	Ascomycota	Dothideomycetes	Hysteriales	Hysteriaceae	Hysterium	Hysterium pulicare
New.ReferenceOTU760	5.72972	2.05822	0.615191	3.34567	0.000820841	0.00994494	Ascomycota	Dothideomycetes	unidentified	unidentified	unidentified	Dothideomycetes sp
New.ReferenceOTU1392	9.33516	1.90995	0.572436	3.33653	0.000848298	0.00994494	Ascomycota	Dothideomycetes	unidentified	unidentified	unidentified	Dothideomycetes sp
New.CleanUp.ReferenceOTU3982	2.06301	-1.76535	0.528177	-3.34235	0.000830727	0.00994494	Ascomycota	Dothideomycetes	Capnodiales	Davidiellaceae	Davidiella	Davidiella tassiana
New.ReferenceOTU1920	4.10228	1.66171	0.503373	3.30114	0.00096292	0.0110535	Basidiomycota	Agaricomycetes	Agaricales	Psathyrellaceae	Coprinellus	Coprinellus eurysporus
New.ReferenceOTU1084	17.0151	1.22204	0.372697	3.27891	0.00104208	0.011674	Ascomycota	unidentified	unidentified	unidentified	unidentified	Ascomycota sp
New.ReferenceOTU707	3.61795	1.83762	0.561229	3.27427	0.00105935	0.011674	Ascomycota	Dothideomycetes	unidentified	unidentified	unidentified	Dothideomycetes sp
New.ReferenceOTU2432	94.4131	0.711509	0.220801	3.22239	0.00127125	0.0137345	Basidiomycota	Tremellomycetes	Tremellales	Incertae sedis	Cryptococcus	Cryptococcus chernovii
New.ReferenceOTU2202	2.43045	1.95283	0.607722	3.21336	0.00131193	0.0139014	Ascomycota	Eurotiomycetes	Chaetothyriales	unidentified	unidentified	Chaetothyriales sp
New.ReferenceOTU280	6.75108	-1.57186	0.495127	-3.17465	0.00150017	0.0153009	Ascomycota	Eurotiomycetes	Eurotiales	Trichocomaceae	Penicillium	Penicillium brevicompactum
New.ReferenceOTU1919	2.14192	2.59085	0.817448	3.16944	0.00152731	0.0153009	Ascomycota	Dothideomycetes	Pleosporales	Cucurbitariaceae	Pyrenochaetopsis	Pyrenochaetopsis microspora
New.ReferenceOTU885	1329.43	-0.480093	0.151239	-3.1744	0.00150147	0.0153009	Ascomycota	Dothideomycetes	Pleosporales	Pleosporaceae	Alternaria	Alternaria eichhorniae
New.ReferenceOTU1155	5.50287	1.59249	0.503298	3.16411	0.00155556	0.0153056	Basidiomycota	Microbotryomycetes	Sporidiobolales	Incertae sedis	Rhodotorula	Rhodotorula armeniaca
New.ReferenceOTU869	3.76873	1.70302	0.545237	3.12345	0.00178745	0.0172786	Ascomycota	Eurotiomycetes	Chaetothyriales	Herpotrichiellaceae	Phaeomoniella	Phaeomoniella niveniae
New.ReferenceOTU2358	7.10085	1.99369	0.644193	3.09486	0.00196904	0.0177162	Ascomycota	Sordariomycetes	Xylariales	Xylariaceae	Barrmaelia	Barrmaelia macrospora
New.ReferenceOTU1312	1.52456	2.2134	0.717135	3.08645	0.00202563	0.0177162	Basidiomycota	Agaricomycetes	Boletales	Suillaceae	Suillus	Suillus pseudobrevipes
New.ReferenceOTU1303	6.62868	1.1217	0.363414	3.08655	0.00202491	0.0177162	Ascomycota	Dothideomycetes	Capnodiales	Mycosphaerellaceae	Mycosphaerella	Mycosphaerella pseudocryptica
New.ReferenceOTU1496	39.3524	1.45983	0.469378	3.11013	0.00187003	0.0177162	unidentified	unidentified	unidentified	unidentified	unidentified	Fungi sp
New.ReferenceOTU1202	7.17959	1.51581	0.48936	3.09754	0.00195135	0.0177162	unidentified	unidentified	unidentified	unidentified	unidentified	uncultured fungus
New.ReferenceOTU1518	6.15378	-0.927864	0.299397	-3.09911	0.00194102	0.0177162	Ascomycota	Dothideomycetes	Capnodiales	Davidiellaceae	Cladosporium	Cladosporium exasperatum
New.ReferenceOTU59	24.4618	0.980709	0.320545	3.05951	0.00221703	0.0190872	Ascomycota	Dothideomycetes	Capnodiales	Teratosphaeriaceae	unidentified	uncultured Teratosphaeriaceae
New.ReferenceOTU1050	229.166	0.955801	0.318395	3.00193	0.00268272	0.0227412	Ascomycota	Dothideomycetes	Dothideales	Dothideaceae	Endoconidioma	Endoconidioma populi
New.ReferenceOTU221	2.37258	1.69889	0.569256	2.98441	0.0028413	0.0237206	unidentified	unidentified	unidentified	unidentified	unidentified	fungal sp TRN499
New.ReferenceOTU656	19.3632	1.46471	0.504437	2.90365	0.00368846	0.0298874	Ascomycota	Dothideomycetes	unidentified	unidentified	unidentified	Dothideomycetes sp
New.ReferenceOTU1055	105.349	-1.2281	0.422286	-2.90821	0.00363506	0.0298874	Ascomycota	Leotiomycetes	Helotiales	Sclerotiniaceae	Botryotinia	Botryotinia fuckeliana
New.ReferenceOTU298	1.78243	2.36674	0.828406	2.85699	0.00427685	0.0341528	Ascomycota	Dothideomycetes	unidentified	unidentified	unidentified	Dothideomycetes sp
New.ReferenceOTU203	93.5523	1.21368	0.428501	2.8324	0.00462006	0.0363664	Basidiomycota	Microbotryomycetes	Sporidiobolales	Incertae sedis	Sporobolomyces	Sporobolomyces sp JCM 11360
New.ReferenceOTU2258	7.80255	1.11646	0.3984	2.80235	0.00507318	0.037271	Ascomycota	Dothideomycetes	Pleosporales	Lophiostomataceae	Lophiostoma	Lophiostoma arundinis
New.ReferenceOTU1418	14.5322	1.44599	0.51581	2.80334	0.00505765	0.037271	Ascomycota	Eurotiomycetes	Chaetothyriales	Herpotrichiellaceae	Phaeococcomyces	Phaeococcomyces aff nigricans P40D010
New.ReferenceOTU2114	1.74729	2.68073	0.954499	2.80853	0.0049769	0.037271	Ascomycota	Dothideomycetes	Pleosporales	unidentified	unidentified	Pleosporales sp
New.ReferenceOTU1212	14.8361	1.42045	0.505126	2.81208	0.00492219	0.037271	Ascomycota	Dothideomycetes	Dothideales	unidentified	unidentified	Dothideales sp
New.ReferenceOTU1778	12.9493	1.00623	0.358316	2.80823	0.00498146	0.037271	Basidiomycota	Exobasidiomycetes	Tilletiales	Tilletiaceae	Tilletia	Tilletia controversa
New.ReferenceOTU151	7.48221	-1.00625	0.359806	-2.79664	0.0051637	0.0374368	Ascomycota	Dothideomycetes	Capnodiales	Davidiellaceae	Cladosporium	Cladosporium exasperatum
New.ReferenceOTU1922	5.41593	1.97769	0.709395	2.78786	0.00530574	0.0379671	Ascomycota	Dothideomycetes	Botryosphaeriales	Incertae sedis	Camarosporium	Camarosporium aloes
New.ReferenceOTU665	27.9243	1.83253	0.662923	2.76432	0.00570412	0.0402945	Ascomycota	Dothideomycetes	Pleosporales	unidentified	unidentified	Pleosporales sp
New.ReferenceOTU577	2.24233	-2.17672	0.79591	-2.73489	0.00624018	0.0420661	Ascomycota	Eurotiomycetes	Eurotiales	Trichocomaceae	Penicillium	Penicillium spinulosum
New.ReferenceOTU1160	3.68082	1.65536	0.604331	2.73916	0.00615956	0.0420661	Ascomycota	Eurotiomycetes	Chaetothyriales	Herpotrichiellaceae	Phaeococcomyces	Phaeococcomyces mexicanus
New.ReferenceOTU1525	1.00777	2.75354	1.00571	2.73791	0.00618314	0.0420661	Ascomycota	Dothideomycetes	Pleosporales	Testudinaceae	Lepidosphaeria	Lepidosphaeria nicotiae
New.ReferenceOTU2406	32.6703	1.34823	0.493167	2.73383	0.00626029	0.0420661	Ascomycota	Dothideomycetes	Pleosporales	Incertae sedis	Didymella	Didymella sp
New.ReferenceOTU1290	12.2925	-0.805303	0.295715	-2.72324	0.00646458	0.0429155	Ascomycota	Dothideomycetes	Capnodiales	Davidiellaceae	Cladosporium	Cladosporium exasperatum
New.ReferenceOTU1016	59.7283	1.50075	0.555105	2.70353	0.00686063	0.0450025	Ascomycota	Dothideomycetes	Capnodiales	Capnodiaceae	Capnodium	Capnodium sp
New.ReferenceOTU1093	2.32363	2.35829	0.880139	2.67945	0.00737436	0.0471488	Ascomycota	Dothideomycetes	Pleosporales	unidentified	unidentified	Pleosporales sp
New.ReferenceOTU1451	6.80584	-3.39245	1.26609	-2.67948	0.00737361	0.0471488	Ascomycota	Saccharomycetes	Saccharomycetales	Metschnikowiaceae	Metschnikowia	Metschnikowia chrysoperlae
New.ReferenceOTU1462	5.75894	1.40222	0.523945	2.67628	0.00744455	0.0471488	Ascomycota	Eurotiomycetes	Chaetothyriales	unidentified	unidentified	Chaetothyriales sp
New.ReferenceOTU940	2.9562	2.15636	0.817137	2.63892	0.00831709	0.0510036	Ascomycota	Dothideomycetes	Pleosporales	Incertae sedis	Phoma	Phoma sp LF258
New.ReferenceOTU2162	2.41201	1.91035	0.724069	2.63836	0.00833089	0.0510036	unidentified	unidentified	unidentified	unidentified	unidentified	Fungi sp
New.ReferenceOTU1198	1.9983	1.63896	0.621015	2.63916	0.00831119	0.0510036	Ascomycota	Dothideomycetes	Dothideales	Dothideaceae	Endoconidioma	Endoconidioma populi
New.ReferenceOTU2408	48.1972	1.06238	0.404262	2.62794	0.00859039	0.0520144	Ascomycota	unidentified	unidentified	unidentified	unidentified	ascomycete sp MA 4907
New.ReferenceOTU831	4.74067	2.5676	0.982443	2.61348	0.00896246	0.0536774	Ascomycota	Dothideomycetes	Dothideales	Dothioraceae	Aureobasidium	Aureobasidium pullulans
New.ReferenceOTU905	51.4499	1.12603	0.438016	2.57075	0.010148	0.0601241	Ascomycota	Dothideomycetes	Capnodiales	Incertae sedis	Toxicocladosporium	Toxicocladosporium leucadendri
New.ReferenceOTU2030	1.39885	1.55906	0.608047	2.56405	0.010346	0.060645	Ascomycota	Dothideomycetes	unidentified	unidentified	unidentified	Dothideomycetes sp
New.ReferenceOTU2020	2.6539	-1.30034	0.509656	-2.5514	0.010729	0.0622283	Ascomycota	Dothideomycetes	Capnodiales	Davidiellaceae	Cladosporium	Cladosporium exasperatum
New.ReferenceOTU2496	1.01328	2.75609	1.08859	2.5318	0.011348	0.0651327	Ascomycota	Dothideomycetes	Capnodiales	Incertae sedis	Phaeotheca	Phaeotheca triangularis
New.ReferenceOTU1788	7.13807	1.72366	0.684531	2.51802	0.0118016	0.0670381	Ascomycota	Dothideomycetes	Pleosporales	Phaeosphaeriaceae	Neostagonospora	Neostagonospora caricis
New.ReferenceOTU2428	1.07264	2.44086	0.974788	2.50399	0.0122803	0.0690453	Ascomycota	Dothideomycetes	Capnodiales	Incertae sedis	Toxicocladosporium	Toxicocladosporium leucadendri
New.ReferenceOTU838	1.27919	1.9743	0.790569	2.49732	0.0125136	0.0696462	Ascomycota	Sordariomycetes	Xylariales	Xylariaceae	unidentified	Xylariales sp M71
New.ReferenceOTU2324	2.10254	2.44028	0.98289	2.48276	0.0130371	0.0699171	Ascomycota	Dothideomycetes	Pleosporales	unidentified	unidentified	Pleosporales sp
New.ReferenceOTU150	0.884701	2.30992	0.929152	2.48605	0.012917	0.0699171	unidentified	unidentified	unidentified	unidentified	unidentified	fungal sp EXP0528F
New.ReferenceOTU2290	1.43217	2.16476	0.872231	2.48186	0.0130698	0.0699171	Ascomycota	Dothideomycetes	Capnodiales	Mycosphaerellaceae	Phaeothecoidea	Phaeothecoidea minutispora
New.ReferenceOTU1149	512.767	0.408963	0.164142	2.49152	0.0127197	0.0699171	Ascomycota	Dothideomycetes	Pleosporales	unidentified	unidentified	Pleosporales sp
New.ReferenceOTU470	1.8345	1.69789	0.685863	2.47555	0.0133032	0.0704812	Basidiomycota	unidentified	unidentified	unidentified	unidentified	Basidiomycota sp
New.ReferenceOTU2498	24.8501	1.04916	0.427125	2.45633	0.0140364	0.0736576	Ascomycota	Dothideomycetes	unidentified	unidentified	unidentified	Dothideomycetes sp
New.ReferenceOTU252	2.96284	-1.99293	0.819099	-2.43308	0.0149712	0.0778218	Ascomycota	Sordariomycetes	Sordariales	Chaetomiaceae	Chaetomium	Chaetomium sp
New.ReferenceOTU240	5.67045	1.70809	0.703428	2.42823	0.0151725	0.0781313	Ascomycota	Dothideomycetes	Pleosporales	Cucurbitariaceae	Pyrenochaetopsis	Pyrenochaetopsis sp
New.ReferenceOTU1371	1.05269	2.02256	0.839199	2.4101	0.015948	0.0813644	Ascomycota	unidentified	unidentified	unidentified	unidentified	uncultured Pezizomycotina
New.ReferenceOTU492	1.36803	2.38313	0.991107	2.40451	0.0161942	0.0818625	Ascomycota	Dothideomycetes	Pleosporales	Incertae sedis	Berkleasmium	Berkleasmium sp
New.ReferenceOTU2424	1.11851	2.44744	1.02195	2.39487	0.0166264	0.083283	Ascomycota	Dothideomycetes	Pleosporales	unidentified	unidentified	Pleosporales sp
New.ReferenceOTU1318	12.5315	1.06858	0.450605	2.37144	0.0177189	0.0871705	Basidiomycota	Tremellomycetes	Tremellales	Incertae sedis	Cryptococcus	Cryptococcus heimaeyensis
New.CleanUp.ReferenceOTU290	0.875284	-2.64505	1.1147	-2.37289	0.0176495	0.0871705	Ascomycota	Dothideomycetes	Pleosporales	Pleosporaceae	Bipolaris	Bipolaris brizae
New.ReferenceOTU1498	12.7778	1.64722	0.698811	2.35718	0.0184143	0.087468	Ascomycota	Dothideomycetes	Capnodiales	Capnodiaceae	Capnodium	Capnodium citri
New.ReferenceOTU608	3.62709	1.08676	0.460457	2.36018	0.0182663	0.087468	Ascomycota	Dothideomycetes	Capnodiales	unidentified	unidentified	Capnodiales sp
New.ReferenceOTU2092	12.9455	1.04451	0.441722	2.36463	0.018048	0.087468	Ascomycota	Dothideomycetes	Capnodiales	Incertae sedis	Arthrocatena	Arthrocatena tenebrio
New.ReferenceOTU1463	1.21011	2.50786	1.06162	2.36229	0.0181625	0.087468	Ascomycota	Dothideomycetes	unidentified	unidentified	unidentified	Dothideomycetes sp
New.ReferenceOTU1471	12.9164	0.825028	0.35467	2.32619	0.0200086	0.0942284	Basidiomycota	Tremellomycetes	Tremellales	Incertae sedis	Cryptococcus	Cryptococcus sp
New.ReferenceOTU193	22.5062	-0.89482	0.385833	-2.31919	0.0203849	0.095187	Ascomycota	Dothideomycetes	Dothideales	Dothioraceae	Aureobasidium	Aureobasidium pullulans
New.ReferenceOTU2180	1.92674	1.61842	0.699466	2.31379	0.0206791	0.0957495	Ascomycota	Lecanoromycetes	Teloschistales	Teloschistaceae	Teloschistes	Teloschistes chrysophthalmus
New.ReferenceOTU844	7.00767	0.820771	0.356578	2.3018	0.0213464	0.0980156	Glomeromycota	Glomeromycetes	Glomerales	Glomeraceae	unidentified	Glomeraceae sp
New.ReferenceOTU1893	2348.66	0.311682	0.136937	2.27609	0.0228405	0.104009	Ascomycota	Dothideomycetes	Pleosporales	Incertae sedis	Didymella	Didymella sp
New.ReferenceOTU429	238.713	0.848645	0.377258	2.24951	0.0244799	0.106735	Ascomycota	Dothideomycetes	Dothideales	Dothideaceae	Endoconidioma	Endoconidioma populi
New.ReferenceOTU556	8.66852	1.40629	0.624285	2.25265	0.0242814	0.106735	Ascomycota	Dothideomycetes	Capnodiales	Mycosphaerellaceae	Mycosphaerella	Mycosphaerella arbuticola
New.ReferenceOTU963	1.15764	1.56454	0.695371	2.24994	0.0244531	0.106735	Glomeromycota	Glomeromycetes	Glomerales	Glomeraceae	unidentified	Glomeraceae sp
New.ReferenceOTU401	20.6302	1.24625	0.553818	2.25029	0.0244304	0.106735	Ascomycota	Eurotiomycetes	Chaetothyriales	Herpotrichiellaceae	unidentified	uncultured Herpotrichiellaceae
New.ReferenceOTU2384	2.86914	1.70544	0.758779	2.2476	0.0246014	0.106735	Ascomycota	Dothideomycetes	Capnodiales	unidentified	unidentified	Capnodiales sp
New.ReferenceOTU1035	43.5791	0.936305	0.414189	2.26057	0.0237857	0.106735	Ascomycota	unidentified	unidentified	unidentified	unidentified	Ascomycota sp
New.ReferenceOTU932	21.9647	1.15918	0.522431	2.21881	0.0264998	0.113189	Ascomycota	Dothideomycetes	Capnodiales	Capnodiaceae	Capnodium	Capnodium coffeae
New.ReferenceOTU2243	1.18371	1.71513	0.772437	2.22041	0.0263907	0.113189	Ascomycota	Dothideomycetes	Pleosporales	Lophiostomataceae	Lophiostoma	Lophiostoma sp DMW2181
New.ReferenceOTU1918	1.22439	1.74504	0.788393	2.21341	0.0268694	0.113885	Basidiomycota	Agaricomycetes	Agaricales	unidentified	unidentified	Agaricales sp
New.ReferenceOTU1590	1.23181	1.68882	0.774012	2.18191	0.0291165	0.122467	Ascomycota	Dothideomycetes	Capnodiales	Davidiellaceae	Cladosporium	Cladosporium exasperatum
New.ReferenceOTU2344	0.806779	2.43435	1.12258	2.16853	0.0301185	0.125722	Ascomycota	Dothideomycetes	unidentified	unidentified	unidentified	Dothideomycetes sp
New.ReferenceOTU1886	1.7443	-3.35233	1.55422	-2.15692	0.0310119	0.127027	Ascomycota	Dothideomycetes	Capnodiales	Davidiellaceae	Davidiella	Davidiella tassiana
New.ReferenceOTU438	921.934	-0.382915	0.17845	-2.14578	0.0318905	0.127027	Ascomycota	Dothideomycetes	Pleosporales	Pleosporaceae	Pleospora	Pleospora herbarum
New.ReferenceOTU1783	2.07289	1.44472	0.673889	2.14385	0.0320448	0.127027	Basidiomycota	Agaricomycetes	Agaricales	unidentified	unidentified	Agaricales sp
New.ReferenceOTU895	6.91587	1.36184	0.635029	2.14452	0.0319909	0.127027	Ascomycota	Dothideomycetes	Pleosporales	unidentified	unidentified	fungal endophyte WMS23
New.ReferenceOTU561	0.931571	1.97026	0.914535	2.15438	0.0312104	0.127027	Ascomycota	Incertae sedis	Incertae sedis	Incertae sedis	Xenoconiothyrium	Xenoconiothyrium catenata
New.ReferenceOTU1459	7.42991	1.13167	0.524009	2.15964	0.0308004	0.127027	Ascomycota	Sordariomycetes	Xylariales	Amphisphaeriaceae	Seimatosporium	Seimatosporium hypericinum
New.CleanUp.ReferenceOTU3088	2.06769	-1.30128	0.604915	-2.15118	0.0314624	0.127027	Ascomycota	Dothideomycetes	Capnodiales	Davidiellaceae	Davidiella	Davidiella tassiana
New.ReferenceOTU2463	3.06853	-4.81804	2.26887	-2.12354	0.0337088	0.132668	Ascomycota	Saccharomycetes	Saccharomycetales	Incertae sedis	unidentified	Saccharomycetales sp
New.ReferenceOTU1696	2.42893	2.04535	0.969916	2.10879	0.0349628	0.136628	Basidiomycota	Agaricomycetes	Agaricales	unidentified	unidentified	Agaricales sp
New.ReferenceOTU1107	2.39182	1.59442	0.759316	2.0998	0.035746	0.138705	unidentified	unidentified	unidentified	unidentified	unidentified	uncultured fungus
New.ReferenceOTU1799	8.59656	0.898201	0.428856	2.09441	0.0362235	0.139505	unidentified	unidentified	unidentified	unidentified	unidentified	fungal sp TRN256
New.ReferenceOTU892	0.919259	2.24378	1.07346	2.09024	0.0365961	0.139505	Ascomycota	Eurotiomycetes	Chaetothyriales	Incertae sedis	Coniosporium	Coniosporium sp h6
New.ReferenceOTU198	1.98306	1.59372	0.762927	2.08896	0.0367117	0.139505	Ascomycota	unidentified	unidentified	unidentified	unidentified	Ascomycota sp
New.ReferenceOTU698	9.31321	0.940657	0.452533	2.07865	0.0376497	0.142089	Ascomycota	Dothideomycetes	Patellariales	Patellariaceae	Rhytidhysteron	Rhytidhysteron sp
New.ReferenceOTU2165	18.5789	0.939897	0.455146	2.06505	0.0389187	0.144893	Ascomycota	Sordariomycetes	Xylariales	Amphisphaeriaceae	Truncatella	Truncatella spadicea
New.ReferenceOTU1524	1.27819	1.93528	0.936803	2.06583	0.0388441	0.144893	unidentified	unidentified	unidentified	unidentified	unidentified	fungal sp VKM FW_2422
New.ReferenceOTU2052	2.90328	1.85076	0.903009	2.04955	0.0404082	0.149429	Ascomycota	Dothideomycetes	unidentified	unidentified	unidentified	Dothideomycetes sp
New.ReferenceOTU2333	1.64191	1.85871	0.910452	2.04152	0.0411991	0.150336	Ascomycota	Dothideomycetes	Pleosporales	Cucurbitariaceae	Curreya	Curreya austroafricana
New.ReferenceOTU166	0.848643	2.03258	0.994926	2.04295	0.0410578	0.150336	Ascomycota	Dothideomycetes	Pleosporales	Cucurbitariaceae	Curreya	Curreya sp
New.ReferenceOTU285	1.78941	-2.15777	1.06403	-2.02793	0.0425672	0.153473	Ascomycota	Leotiomycetes	Erysiphales	Erysiphaceae	Erysiphe	Erysiphe convolvuli
New.CleanUp.ReferenceOTU1167	1.33858	-1.15299	0.568689	-2.02746	0.0426159	0.153473	Ascomycota	Dothideomycetes	Capnodiales	Davidiellaceae	Cladosporium	Cladosporium exasperatum
New.ReferenceOTU1043	0.848495	1.95723	0.967004	2.02402	0.0429684	0.153737	Ascomycota	unidentified	unidentified	unidentified	unidentified	Ascomycota sp
New.ReferenceOTU1962	1.70614	1.30884	0.652766	2.00507	0.0449559	0.158787	Basidiomycota	Agaricostilbomycetes	unidentified	unidentified	unidentified	Agaricostilbomycetes sp
New.ReferenceOTU1288	2.26043	-1.67305	0.833504	-2.00724	0.0447238	0.158787	Ascomycota	Dothideomycetes	Capnodiales	Incertae sedis	Capnobotryella	Capnobotryella sp
New.ReferenceOTU1113	11.6747	0.956324	0.479049	1.9963	0.0459016	0.161094	Ascomycota	Sordariomycetes	Diaporthales	Incertae sedis	Harknessia	Harknessia ravenstreetina
New.ReferenceOTU1354	1.43493	1.62743	0.817904	1.98976	0.0466176	0.162572	unidentified	unidentified	unidentified	unidentified	unidentified	fungal sp P1S14
New.ReferenceOTU506	2.13915	2.3267	1.1782	1.97479	0.0482925	0.167353	Ascomycota	Dothideomycetes	Pleosporales	unidentified	unidentified	Pleosporales sp
New.ReferenceOTU1281	0.980266	2.41368	1.22792	1.96567	0.0493371	0.169905	Ascomycota	Dothideomycetes	Capnodiales	unidentified	unidentified	Capnodiales sp
New.ReferenceOTU761	3.95499	-1.41324	0.728078	-1.94105	0.052252	0.178825	Ascomycota	Sordariomycetes	Diaporthales	Valsaceae	Cytospora	Cytospora austromontana
New.ReferenceOTU1687	1.21901	-1.75366	0.907132	-1.93319	0.0532131	0.18099	Ascomycota	Dothideomycetes	Pleosporales	Pleosporaceae	Curvularia	Curvularia inaequalis
New.ReferenceOTU1319	1.51681	1.33683	0.695026	1.92343	0.054426	0.182858	Ascomycota	Dothideomycetes	Capnodiales	unidentified	unidentified	Capnodiales sp
New.ReferenceOTU1899	1.03768	1.40291	0.728587	1.92552	0.054164	0.182858	Basidiomycota	Cystobasidiomycetes	Erythrobasidiales	Incertae sedis	Erythrobasidium	Erythrobasidium hasegawianum
New.ReferenceOTU824	7.96866	1.03458	0.544092	1.90148	0.0572395	0.191145	Basidiomycota	Agaricomycetes	Agaricales	unidentified	unidentified	Agaricales sp
New.ReferenceOTU1817	1.1759	2.95706	1.56603	1.88825	0.058993	0.194642	Ascomycota	Dothideomycetes	Dothideales	Dothideaceae	Endoconidioma	Endoconidioma populi
New.ReferenceOTU520	2.17256	1.25789	0.66544	1.89032	0.0587154	0.194642	Ascomycota	unidentified	unidentified	unidentified	unidentified	Ascomycota sp
SH199058.07FU_JX981477_reps	2.04179	1.24595	0.663993	1.87645	0.0605934	0.195121	Ascomycota	Dothideomycetes	Pleosporales	unidentified	unidentified	Pleosporales sp
New.ReferenceOTU2023	1.40976	1.30852	0.698192	1.87416	0.0609088	0.195121	Ascomycota	Incertae sedis	Incertae sedis	Incertae sedis	Torula	Torula sp
New.ReferenceOTU1785	2.54452	1.30209	0.691225	1.88375	0.0595993	0.195121	Ascomycota	Sordariomycetes	Xylariales	unidentified	unidentified	Xylariales sp
New.ReferenceOTU1941	480.259	0.514577	0.274021	1.87787	0.0603989	0.195121	Basidiomycota	unidentified	unidentified	unidentified	unidentified	Basidiomycota sp
New.ReferenceOTU1831	74.9068	1.45356	0.773362	1.87953	0.0601725	0.195121	Ascomycota	Dothideomycetes	Pleosporales	unidentified	unidentified	Pleosporales sp
New.ReferenceOTU2287	9.76198	1.34795	0.721797	1.86749	0.0618329	0.196936	Ascomycota	Sordariomycetes	Xylariales	unidentified	unidentified	Xylariales sp
New.ReferenceOTU275	0.837105	1.41927	0.765394	1.8543	0.0636959	0.201704	Ascomycota	Dothideomycetes	Dothideales	Dothideaceae	Endoconidioma	Endoconidioma populi
New.ReferenceOTU1067	950.392	-0.298632	0.162723	-1.83522	0.0664733	0.205727	Ascomycota	Dothideomycetes	Pleosporales	Pleosporaceae	Lewia	Lewia infectoria
New.ReferenceOTU1421	24.1862	0.870965	0.474401	1.83593	0.0663685	0.205727	Basidiomycota	Tremellomycetes	Tremellales	Incertae sedis	Cryptococcus	Cryptococcus saitoi
New.ReferenceOTU1332	12.5166	0.778028	0.424504	1.83279	0.0668333	0.205727	Ascomycota	Dothideomycetes	Dothideales	Dothioraceae	Pringsheimia	Pringsheimia sp
New.ReferenceOTU1512	1.5609	1.17117	0.637378	1.83749	0.0661379	0.205727	Ascomycota	Dothideomycetes	Capnodiales	Mycosphaerellaceae	Mycosphaerella	Mycosphaerella sp CPC 12200
New.ReferenceOTU472	0.831638	1.9936	1.08373	1.83958	0.06583	0.205727	Ascomycota	Dothideomycetes	Pleosporales	Phaeosphaeriaceae	Phaeosphaeria	Phaeosphaeria sp
New.ReferenceOTU1215	1.70354	1.51693	0.836858	1.81264	0.0698867	0.213881	Ascomycota	Dothideomycetes	Capnodiales	Mycosphaerellaceae	Phaeothecoidea	Phaeothecoidea sp NO235a
New.ReferenceOTU142	0.804514	1.59149	0.879157	1.81024	0.0702586	0.213881	Ascomycota	Dothideomycetes	Pleosporales	Montagnulaceae	Paraconiothyrium	Paraconiothyrium hawaiiense
New.ReferenceOTU394	8.16358	0.839897	0.466277	1.80128	0.0716582	0.216148	Ascomycota	Dothideomycetes	Capnodiales	Teratosphaeriaceae	Teratosphaeria	Teratosphaeria knoxdavesii
New.ReferenceOTU1853	17.1569	-0.546031	0.303272	-1.80046	0.0717877	0.216148	Ascomycota	Dothideomycetes	Pleosporales	Pleosporaceae	Ulocladium	Ulocladium chartarum
New.ReferenceOTU2311	14.2106	0.8382	0.469324	1.78597	0.0741035	0.219037	Ascomycota	Dothideomycetes	Pleosporales	Incertae sedis	Phoma	Phoma sp
New.ReferenceOTU388	0.84959	2.9557	1.65006	1.79127	0.0732505	0.219037	unidentified	unidentified	unidentified	unidentified	unidentified	uncultured fungus
New.ReferenceOTU508	0.929198	1.8177	1.01606	1.78897	0.0736194	0.219037	unidentified	unidentified	unidentified	unidentified	unidentified	fungal sp TRN254
New.ReferenceOTU2389	1.29981	-1.84614	1.03466	-1.78431	0.0743737	0.219037	Ascomycota	Dothideomycetes	Capnodiales	Incertae sedis	Meristemomyces	Meristemomyces frigidus
New.ReferenceOTU308	0.838722	2.4141	1.35465	1.78209	0.074735	0.219037	unidentified	unidentified	unidentified	unidentified	unidentified	Fungi sp
New.ReferenceOTU1796	3.56364	-1.41468	0.796068	-1.77708	0.0755546	0.220268	Ascomycota	Dothideomycetes	Pleosporales	Sporormiaceae	unidentified	Sporormiaceae sp
New.ReferenceOTU1177	3.32553	0.985729	0.557278	1.76883	0.0769227	0.223076	Basidiomycota	Microbotryomycetes	Sporidiobolales	Incertae sedis	Sporobolomyces	Sporobolomyces ruberrimus
New.ReferenceOTU1063	1.11735	1.34776	0.763105	1.76615	0.077371	0.223201	Basidiomycota	Tremellomycetes	Tremellales	Incertae sedis	Cryptococcus	Cryptococcus adeliensis
New.ReferenceOTU1112	1.50587	1.44181	0.818048	1.76251	0.0779836	0.223797	unidentified	unidentified	unidentified	unidentified	unidentified	Fungi sp
New.ReferenceOTU1181	17.2238	1.01291	0.580489	1.74493	0.0809964	0.231239	Ascomycota	Dothideomycetes	Dothideales	Dothioraceae	Pringsheimia	Pringsheimia sp
New.ReferenceOTU1320	2.27464	1.64067	0.944113	1.73779	0.0822474	0.2336	Ascomycota	Dothideomycetes	Capnodiales	unidentified	unidentified	Capnodiales sp M_Camp7
New.ReferenceOTU1741	1.16289	1.89721	1.09676	1.72984	0.0836587	0.23639	Ascomycota	Dothideomycetes	unidentified	unidentified	unidentified	Dothideomycetes sp
New.ReferenceOTU1936	2.26033	1.04304	0.605279	1.72324	0.0848455	0.23852	Basidiomycota	Tremellomycetes	Tremellales	Incertae sedis	unidentified	Tremellales sp
New.ReferenceOTU1752	3.60171	-0.995286	0.580298	-1.71513	0.0863214	0.23901	Ascomycota	Dothideomycetes	Pleosporales	Pleosporaceae	Lewia	Lewia infectoria
New.ReferenceOTU348	140.336	-0.382083	0.222258	-1.71909	0.0855977	0.23901	Ascomycota	Dothideomycetes	Pleosporales	Pleosporaceae	Chalastospora	Chalastospora ellipsoidea
New.ReferenceOTU1602	1.19834	2.53758	1.47897	1.71578	0.0862023	0.23901	Ascomycota	Dothideomycetes	Pleosporales	Pleosporaceae	Pyrenophora	Pyrenophora graminea
New.ReferenceOTU424	1.04696	1.67931	0.980769	1.71224	0.0868518	0.239149	Ascomycota	Incertae sedis	Incertae sedis	Incertae sedis	Knufia	Knufia sp
New.ReferenceOTU1286	3.71839	1.00099	0.585324	1.71014	0.0872393	0.239149	Ascomycota	Dothideomycetes	Pleosporales	Montagnulaceae	Paraphaeosphaeria	Paraphaeosphaeria michotii
New.ReferenceOTU1313	2.57831	0.975518	0.5731	1.70218	0.088722	0.242009	Ascomycota	unidentified	unidentified	unidentified	unidentified	uncultured Ascomycota
New.ReferenceOTU1091	374.239	0.494926	0.292531	1.69187	0.09067	0.246104	Ascomycota	Dothideomycetes	Dothideales	Dothideaceae	Endoconidioma	Endoconidioma populi
New.ReferenceOTU2292	0.992339	2.30644	1.36907	1.68468	0.0920509	0.247415	Ascomycota	Eurotiomycetes	Chaetothyriales	Herpotrichiellaceae	Capronia	Capronia peltigerae
New.ReferenceOTU2091	2.21525	1.26504	0.750898	1.68471	0.092045	0.247415	Ascomycota	unidentified	unidentified	unidentified	unidentified	uncultured Ascomycota
New.ReferenceOTU1923	17.1907	0.958033	0.575234	1.66546	0.09582	0.256295	Ascomycota	Eurotiomycetes	Chaetothyriales	Herpotrichiellaceae	Exophiala	Exophiala eucalyptorum
New.ReferenceOTU332	1.54419	1.40333	0.846825	1.65717	0.097486	0.259492	unidentified	unidentified	unidentified	unidentified	unidentified	fungal endophyte
New.ReferenceOTU1625	1.1045	1.75913	1.06737	1.64809	0.0993336	0.263139	unidentified	unidentified	unidentified	unidentified	unidentified	uncultured fungus
New.ReferenceOTU1991	0.857442	1.85425	1.12892	1.64249	0.100488	0.264923	Basidiomycota	Agaricomycetes	Agaricales	unidentified	unidentified	Agaricales sp
New.ReferenceOTU897	3825.29	-0.667084	0.408961	-1.63117	0.102855	0.269871	Ascomycota	Dothideomycetes	Dothideales	Dothioraceae	Aureobasidium	Aureobasidium pullulans
New.ReferenceOTU1456	1.4372	1.32208	0.812321	1.62753	0.103625	0.270603	Ascomycota	unidentified	unidentified	unidentified	unidentified	uncultured Ascomycota
New.ReferenceOTU853	0.798393	1.97184	1.21386	1.62444	0.104283	0.271036	Ascomycota	Dothideomycetes	Pleosporales	unidentified	unidentified	fungal endophyte WMS23
New.ReferenceOTU398	0.961446	2.1865	1.36205	1.60531	0.108427	0.279173	Ascomycota	Eurotiomycetes	Chaetothyriales	Chaetothyriaceae	unidentified	Chaetothyriaceae sp
New.ReferenceOTU256	1.69475	1.53825	0.957431	1.60664	0.108133	0.279173	Ascomycota	Dothideomycetes	Pleosporales	Cucurbitariaceae	Curreya	Curreya sp
New.ReferenceOTU1592	93.1173	0.946782	0.593928	1.5941	0.110914	0.284248	Ascomycota	Dothideomycetes	Pleosporales	Dothidotthiaceae	Spencermartinsia	Spencermartinsia rosulata
New.ReferenceOTU856	2.10541	1.15331	0.726917	1.58657	0.112609	0.287258	Ascomycota	unidentified	unidentified	unidentified	unidentified	Ascomycota sp
New.CleanUp.ReferenceOTU2483	1.57738	1.52553	0.967457	1.57684	0.114832	0.291578	Ascomycota	Dothideomycetes	Pleosporales	unidentified	unidentified	fungal endophyte WMS23
New.ReferenceOTU1284	1.02752	1.22119	0.780704	1.56422	0.117765	0.297654	Ascomycota	Dothideomycetes	Capnodiales	Teratosphaeriaceae	Catenulostroma	Catenulostroma hermanusense
New.ReferenceOTU1143	4.64136	1.00086	0.641421	1.56038	0.11867	0.298571	Ascomycota	unidentified	unidentified	unidentified	unidentified	Ascomycota sp
New.ReferenceOTU1279	11.5279	-0.708039	0.459867	-1.53966	0.123643	0.30967	Ascomycota	Sordariomycetes	Incertae sedis	Incertae sedis	Cryptovalsa	Cryptovalsa ampelina
New.ReferenceOTU913	4.13056	0.980974	0.645329	1.52011	0.128482	0.314639	Ascomycota	Dothideomycetes	Capnodiales	Incertae sedis	Rachicladosporium	Rachicladosporium americanum
New.ReferenceOTU710	2.20484	1.23259	0.80662	1.52809	0.12649	0.314639	Ascomycota	Dothideomycetes	Capnodiales	unidentified	unidentified	Capnodiales sp M_Camp7
New.ReferenceOTU20	5.48605	1.27543	0.838898	1.52036	0.12842	0.314639	Ascomycota	Dothideomycetes	unidentified	unidentified	unidentified	dothideomycete sp 7683
New.ReferenceOTU2168	4.68179	-0.540813	0.355648	-1.52064	0.128349	0.314639	Ascomycota	Dothideomycetes	Capnodiales	Davidiellaceae	Cladosporium	Cladosporium fusiforme
New.ReferenceOTU1852	2.42668	1.2263	0.80419	1.52489	0.127287	0.314639	Ascomycota	Dothideomycetes	unidentified	unidentified	unidentified	Dothideomycetes sp
New.ReferenceOTU1766	1.6972	1.14538	0.755295	1.51646	0.129403	0.315491	Ascomycota	unidentified	unidentified	unidentified	unidentified	uncultured Pezizomycotina
New.ReferenceOTU706	1.27617	1.78981	1.18534	1.50996	0.131054	0.316713	Ascomycota	Dothideomycetes	Myriangiales	Myriangiaceae	Myriangium	Myriangium sp UFMG_BRO197
New.ReferenceOTU2403	2.19522	1.70835	1.13064	1.51095	0.1308	0.316713	Ascomycota	Dothideomycetes	Dothideales	unidentified	unidentified	Dothideales sp
New.ReferenceOTU213	5.44316	0.899785	0.601602	1.49565	0.134745	0.32002	Basidiomycota	Agaricomycetes	Polyporales	Ganodermataceae	Ganoderma	Ganoderma australe
New.ReferenceOTU226	3.15028	1.311	0.876098	1.49641	0.134547	0.32002	Ascomycota	Dothideomycetes	Pleosporales	unidentified	unidentified	Pleosporales sp
New.ReferenceOTU318	1.80777	1.06757	0.711144	1.5012	0.133304	0.32002	Ascomycota	Sordariomycetes	Hypocreales	Nectriaceae	Fusarium	Fusarium proliferatum
New.CleanUp.ReferenceOTU4624	1.76073	1.11954	0.747828	1.49706	0.134379	0.32002	Ascomycota	Dothideomycetes	Pleosporales	Montagnulaceae	Paraconiothyrium	Paraconiothyrium hawaiiense
New.ReferenceOTU2115	0.832938	-2.60732	1.75318	-1.48719	0.136964	0.323893	Ascomycota	Saccharomycetes	Saccharomycetales	Saccharomycodaceae	Hanseniaspora	Hanseniaspora uvarum
New.ReferenceOTU1539	1.57396	1.42084	0.96011	1.47988	0.138907	0.327083	unidentified	unidentified	unidentified	unidentified	unidentified	uncultured fungus
New.ReferenceOTU2214	4.11046	1.0241	0.696049	1.4713	0.14121	0.331093	Ascomycota	Eurotiomycetes	Chaetothyriales	unidentified	unidentified	Chaetothyriales sp MSX 47445
New.ReferenceOTU1416	1.18169	1.60378	1.09522	1.46434	0.143101	0.332695	Ascomycota	Dothideomycetes	Capnodiales	Davidiellaceae	Cladosporium	Cladosporium exasperatum
New.ReferenceOTU493	2.39236	1.70366	1.16281	1.46512	0.142888	0.332695	unidentified	unidentified	unidentified	unidentified	unidentified	Fungi sp
New.ReferenceOTU946	1.82259	1.42753	0.978455	1.45896	0.144576	0.33421	Ascomycota	unidentified	unidentified	unidentified	unidentified	Ascomycota sp
New.ReferenceOTU972	6.70415	0.72169	0.495592	1.45622	0.145333	0.33421	Ascomycota	Dothideomycetes	Capnodiales	Mycosphaerellaceae	unidentified	uncultured Mycosphaerellaceae
New.ReferenceOTU1981	5.0607	-0.641558	0.440827	-1.45535	0.145572	0.33421	Ascomycota	Dothideomycetes	Dothideales	Dothioraceae	Aureobasidium	Aureobasidium pullulans
New.ReferenceOTU1867	1.43908	-1.53624	1.06059	-1.44848	0.147482	0.337189	Ascomycota	Leotiomycetes	Erysiphales	Erysiphaceae	Erysiphe	Erysiphe betae
New.ReferenceOTU1194	6.47124	0.647226	0.447506	1.4463	0.148094	0.337189	Basidiomycota	Ustilaginomycetes	Ustilaginales	Ustilaginaceae	Ustilago	Ustilago maydis
New.ReferenceOTU73	0.916862	1.64851	1.14261	1.44276	0.149088	0.338057	Basidiomycota	Agaricomycetes	Agaricales	Psathyrellaceae	unidentified	Psathyrellaceae sp
New.ReferenceOTU727	34.2552	0.578313	0.40378	1.43225	0.152073	0.341944	Basidiomycota	Ustilaginomycetes	Ustilaginales	Ustilaginaceae	unidentified	Ustilaginaceae sp
New.ReferenceOTU1970	1.74666	1.04934	0.73371	1.43018	0.152665	0.341944	Ascomycota	Sordariomycetes	unidentified	unidentified	unidentified	Sordariomycetes sp
New.ReferenceOTU50	1.86559	1.49945	1.04658	1.43272	0.151938	0.341944	Ascomycota	Dothideomycetes	Pleosporales	unidentified	unidentified	Pleosporales sp
New.ReferenceOTU2348	1.10094	1.45679	1.02558	1.42046	0.155472	0.346823	unidentified	unidentified	unidentified	unidentified	unidentified	uncultured fungus
New.ReferenceOTU2452	1.87543	1.45483	1.03251	1.40903	0.158826	0.351458	Ascomycota	Dothideomycetes	Pleosporales	unidentified	unidentified	Pleosporales sp
New.ReferenceOTU1849	0.832988	1.6031	1.13641	1.41067	0.158343	0.351458	Ascomycota	Lecanoromycetes	Ostropales	unidentified	unidentified	Ostropales sp s056
New.ReferenceOTU569	2.38313	1.02965	0.734629	1.40159	0.161037	0.354926	Ascomycota	Lecanoromycetes	Baeomycetales	Baeomycetaceae	Ainoa	Ainoa geochroa
New.ReferenceOTU448	230.249	0.469025	0.337939	1.3879	0.165168	0.361142	Basidiomycota	Ustilaginomycetes	Ustilaginales	Ustilaginaceae	Ustilago	Ustilago maydis
New.ReferenceOTU2486	18.8408	1.01524	0.731023	1.3888	0.164894	0.361142	Ascomycota	Sordariomycetes	Xylariales	unidentified	unidentified	Xylariales sp
New.ReferenceOTU1409	1.59229	1.17858	0.855086	1.37832	0.168104	0.364666	Ascomycota	Dothideomycetes	Capnodiales	unidentified	unidentified	Capnodiales sp
New.ReferenceOTU532	0.965665	1.18859	0.861348	1.37991	0.167613	0.364666	Ascomycota	Sordariomycetes	Sordariales	unidentified	unidentified	Sordariales sp
New.ReferenceOTU97	1.09318	-1.80181	1.3163	-1.36884	0.17105	0.369602	Basidiomycota	Microbotryomycetes	Sporidiobolales	Incertae sedis	Sporobolomyces	Sporobolomyces sp TD49
New.ReferenceOTU1380	11.3435	1.0679	0.790145	1.35152	0.176528	0.379949	Ascomycota	unidentified	unidentified	unidentified	unidentified	Ascomycota sp
New.ReferenceOTU423	2.95787	1.02014	0.759202	1.3437	0.179045	0.383866	Ascomycota	Dothideomycetes	unidentified	unidentified	unidentified	Dothideomycetes sp
New.ReferenceOTU1655	1.43329	1.10352	0.828257	1.33234	0.18275	0.387682	Basidiomycota	Agaricomycetes	Agaricales	Psathyrellaceae	Coprinopsis	Coprinopsis atramentaria
New.ReferenceOTU2223	0.933147	1.58564	1.19254	1.32963	0.183639	0.387682	Ascomycota	Eurotiomycetes	Chaetothyriales	Herpotrichiellaceae	Exophiala	Exophiala xenobiotica
New.ReferenceOTU1364	95.7735	-0.252337	0.189715	-1.33009	0.18349	0.387682	Ascomycota	Dothideomycetes	Pleosporales	Pleosporaceae	Pleospora	Pleospora herbarum
New.ReferenceOTU1521	1.71836	-0.756276	0.566915	-1.33402	0.182197	0.387682	Ascomycota	Dothideomycetes	Capnodiales	Davidiellaceae	Cladosporium	Cladosporium exasperatum
New.ReferenceOTU667	1.18729	1.49265	1.12562	1.32607	0.184816	0.388678	Ascomycota	Dothideomycetes	Pleosporales	Phaeosphaeriaceae	Phaeosphaeriopsis	Phaeosphaeriopsis nolinae
New.ReferenceOTU422	5.75015	1.20344	0.910781	1.32133	0.186391	0.3905	Ascomycota	Eurotiomycetes	Chaetothyriales	Herpotrichiellaceae	unidentified	uncultured Herpotrichiellaceae
New.ReferenceOTU1429	3.26375	0.668758	0.511434	1.30761	0.191005	0.394856	Basidiomycota	Agaricomycetes	Polyporales	Ganodermataceae	Ganoderma	Ganoderma resinaceum
New.ReferenceOTU2011	1.83947	-1.93321	1.47953	-1.30663	0.191337	0.394856	Ascomycota	Dothideomycetes	Pleosporales	Pleosporaceae	Bipolaris	Bipolaris sp HSAUP074449
New.ReferenceOTU734	0.927392	1.44647	1.10472	1.30935	0.190416	0.394856	Ascomycota	Eurotiomycetes	Chaetothyriales	Herpotrichiellaceae	unidentified	Herpotrichiellaceae sp
New.ReferenceOTU2143	8.65066	0.509684	0.389687	1.30793	0.190897	0.394856	Ascomycota	Dothideomycetes	Dothideales	Dothideaceae	Endoconidioma	Endoconidioma populi
New.ReferenceOTU1217	1.15536	1.07879	0.833975	1.29355	0.19582	0.4026	Ascomycota	Dothideomycetes	Dothideales	Dothideaceae	Endoconidioma	Endoconidioma populi
New.ReferenceOTU2152	5.40473	0.885824	0.68828	1.28701	0.19809	0.405754	Basidiomycota	Agaricomycetes	Agaricales	Psathyrellaceae	Coprinellus	Coprinellus sp
New.ReferenceOTU2224	10.8833	0.662665	0.521798	1.26996	0.204097	0.416509	Ascomycota	Dothideomycetes	Pleosporales	Phaeosphaeriaceae	Sclerostagonospora	Sclerostagonospora sp 87 YS_2010
New.CleanUp.ReferenceOTU3350	1.74717	1.17108	0.92386	1.26759	0.204943	0.416692	Ascomycota	Dothideomycetes	Pleosporales	Pleosporaceae	Ulocladium	Ulocladium chartarum
New.ReferenceOTU297	5.36455	0.759864	0.607934	1.24991	0.211332	0.428102	Ascomycota	Dothideomycetes	Pleosporales	Incertae sedis	Phoma	Phoma puncteliae
New.ReferenceOTU2443	5.40477	0.618001	0.50306	1.22848	0.219265	0.439884	Basidiomycota	Tremellomycetes	Tremellales	Incertae sedis	Cryptococcus	Cryptococcus wieringae
New.ReferenceOTU2381	1.05097	1.38436	1.12598	1.22947	0.218895	0.439884	Ascomycota	Dothideomycetes	Pleosporales	Pleosporaceae	unidentified	Pleosporaceae sp
New.ReferenceOTU810	1.12403	1.04604	0.851998	1.22774	0.219543	0.439884	Ascomycota	Sordariomycetes	Hypocreales	Hypocreaceae	Trichoderma	Trichoderma koningiopsis
New.ReferenceOTU1079	20.776	0.601871	0.491855	1.22368	0.221074	0.441347	unidentified	unidentified	unidentified	unidentified	unidentified	Fungi sp
New.ReferenceOTU291	2.43518	0.855149	0.706356	1.21065	0.22603	0.446864	Ascomycota	Sordariomycetes	Xylariales	Amphisphaeriaceae	unidentified	Amphisphaeriaceae sp
New.ReferenceOTU2474	2.57584	0.677188	0.559649	1.21002	0.22627	0.446864	Ascomycota	Dothideomycetes	Capnodiales	Davidiellaceae	Davidiella	Davidiella tassiana
New.ReferenceOTU2385	5.70894	-0.471706	0.389035	-1.2125	0.22532	0.446864	Ascomycota	Dothideomycetes	Pleosporales	Pleosporaceae	Alternaria	Alternaria eichhorniae
New.ReferenceOTU1469	1.20313	-1.2751	1.06065	-1.20218	0.229294	0.451217	Ascomycota	unidentified	unidentified	unidentified	unidentified	Ascomycota sp
New.ReferenceOTU1454	10.537	-0.710091	0.594774	-1.19388	0.232524	0.455945	Ascomycota	Dothideomycetes	Dothideales	Dothioraceae	Aureobasidium	Aureobasidium pullulans
New.ReferenceOTU1184	1.36803	-0.96015	0.807196	-1.18949	0.234248	0.457697	Ascomycota	Eurotiomycetes	Eurotiales	Trichocomaceae	Aspergillus	Aspergillus amstelodami
New.ReferenceOTU1749	6.397	0.573052	0.483249	1.18583	0.235689	0.458885	Ascomycota	Dothideomycetes	unidentified	unidentified	unidentified	Dothideomycetes sp
New.ReferenceOTU301	0.919872	-1.27516	1.08636	-1.17379	0.240478	0.466561	Basidiomycota	Agaricomycetes	Agaricales	unidentified	unidentified	Agaricales sp
New.ReferenceOTU281	2.28938	0.920418	0.785652	1.17153	0.241384	0.466676	Ascomycota	Dothideomycetes	Dothideales	Dothideaceae	Dothidea	Dothidea insculpta
New.ReferenceOTU1352	1.53151	0.914292	0.785314	1.16424	0.244328	0.468931	Ascomycota	Eurotiomycetes	Chaetothyriales	Herpotrichiellaceae	Phaeomoniella	Phaeomoniella sp
New.ReferenceOTU380	4.6505	-1.05511	0.907799	-1.16227	0.245124	0.468931	Ascomycota	Dothideomycetes	Pleosporales	Sporormiaceae	unidentified	Sporormiaceae sp
New.ReferenceOTU1366	23.233	0.410371	0.353698	1.16023	0.245955	0.468931	Ascomycota	Sordariomycetes	Hypocreales	Nectriaceae	Fusarium	Fusarium sp
New.ReferenceOTU92	1.16551	-0.861194	0.741107	-1.16204	0.245221	0.468931	Ascomycota	Dothideomycetes	Capnodiales	Davidiellaceae	Cladosporium	Cladosporium fusiforme
New.CleanUp.ReferenceOTU418	1.01045	1.25052	1.09609	1.14089	0.253916	0.482441	Ascomycota	Dothideomycetes	unidentified	unidentified	unidentified	Dothideomycetes sp
New.ReferenceOTU928	1.94848	0.898307	0.789938	1.13719	0.25546	0.483706	Ascomycota	Dothideomycetes	Capnodiales	Teratosphaeriaceae	unidentified	Teratosphaeriaceae sp
New.ReferenceOTU2095	0.836954	1.91757	1.69169	1.13352	0.256995	0.484946	Ascomycota	unidentified	unidentified	unidentified	unidentified	uncultured Ascomycota
New.ReferenceOTU687	1.04385	1.27332	1.1293	1.12753	0.259517	0.488035	Ascomycota	unidentified	unidentified	unidentified	unidentified	uncultured Ascomycota
New.ReferenceOTU1787	9.25591	0.661036	0.589277	1.12177	0.261959	0.49095	unidentified	unidentified	unidentified	unidentified	unidentified	uncultured fungus
New.ReferenceOTU690	3.53829	-0.789156	0.706286	-1.11733	0.263852	0.492823	Ascomycota	Sordariomycetes	Sordariales	Chaetomiaceae	Humicola	Humicola grisea var. grisea
New.ReferenceOTU1137	1.70052	0.851022	0.768867	1.10685	0.268358	0.499545	Ascomycota	Dothideomycetes	Pleosporales	Incertae sedis	Phoma	Phoma sp
New.ReferenceOTU1398	2.85598	0.844092	0.765748	1.10231	0.270327	0.501515	unidentified	unidentified	unidentified	unidentified	unidentified	uncultured fungus
New.ReferenceOTU733	3.22929	0.832031	0.774181	1.07472	0.282498	0.510259	Ascomycota	Dothideomycetes	Capnodiales	unidentified	unidentified	Capnodiales sp
New.ReferenceOTU426	3.18958	0.757513	0.705738	1.07336	0.283108	0.510259	Ascomycota	Dothideomycetes	Capnodiales	Teratosphaeriaceae	unidentified	uncultured Teratosphaeriaceae
New.ReferenceOTU1822	1.00115	1.02935	0.945395	1.0888	0.27624	0.510259	Ascomycota	Eurotiomycetes	Chaetothyriales	Herpotrichiellaceae	unidentified	Herpotrichiellaceae sp
New.ReferenceOTU1547	3.28224	-1.09165	1.00572	-1.08544	0.277728	0.510259	Ascomycota	Leotiomycetes	Helotiales	Rutstroemiaceae	Lambertella	Lambertella corni_maris
New.ReferenceOTU1449	4.16821	0.815498	0.753958	1.08162	0.27942	0.510259	Basidiomycota	Ustilaginomycetes	Urocystidales	Glomosporiaceae	Thecaphora	Thecaphora oxytropis
New.ReferenceOTU1631	4.46547	0.707225	0.653332	1.08249	0.279035	0.510259	Ascomycota	Sordariomycetes	Hypocreales	Nectriaceae	unidentified	Nectriaceae sp
New.ReferenceOTU1701	4.2222	1.01047	0.937105	1.07829	0.280905	0.510259	Ascomycota	unidentified	unidentified	unidentified	unidentified	ascomycete sp MA 4921
New.ReferenceOTU274	1.75558	0.838124	0.781271	1.07277	0.283374	0.510259	Ascomycota	Eurotiomycetes	Mycocaliciales	Mycocaliciaceae	Chaenothecopsis	Chaenothecopsis pusilla
New.ReferenceOTU1983	0.86475	-1.20284	1.11632	-1.07751	0.281253	0.510259	Basidiomycota	Agaricomycetes	Agaricales	Lycoperdaceae	unidentified	Lycoperdaceae sp
New.ReferenceOTU2397	1.71453	0.736327	0.692073	1.06394	0.287354	0.51574	Ascomycota	unidentified	unidentified	unidentified	unidentified	uncultured Ascomycota
New.ReferenceOTU2459	1.37621	-0.924628	0.87569	-1.05588	0.291021	0.519946	Ascomycota	Dothideomycetes	Pleosporales	Sporormiaceae	Preussia	Preussia flanaganii
New.ReferenceOTU1735	2.8784	0.84574	0.801915	1.05465	0.291585	0.519946	Basidiomycota	Agaricomycetes	Agaricales	Psathyrellaceae	Coprinellus	Coprinellus curtus
New.ReferenceOTU1111	1.69898	0.815129	0.777368	1.04858	0.294374	0.523225	Ascomycota	Dothideomycetes	Capnodiales	unidentified	unidentified	Capnodiales sp
New.ReferenceOTU1076	28.8654	0.540209	0.517479	1.04393	0.29652	0.523662	Ascomycota	Dothideomycetes	unidentified	unidentified	unidentified	Dothideomycetes sp
New.ReferenceOTU629	1.62781	1.04978	1.00465	1.04492	0.296062	0.523662	Ascomycota	Dothideomycetes	Pleosporales	unidentified	unidentified	Pleosporales sp
New.ReferenceOTU2530	3.66534	0.563512	0.541142	1.04134	0.297719	0.524099	Ascomycota	Dothideomycetes	Capnodiales	Mycosphaerellaceae	unidentified	uncultured Mycosphaerellaceae
New.ReferenceOTU1300	0.984414	-1.08464	1.05584	-1.02728	0.304287	0.533955	Ascomycota	unidentified	unidentified	unidentified	unidentified	Ascomycota sp
New.ReferenceOTU390	7.84077	0.574172	0.562292	1.02113	0.307194	0.537346	Ascomycota	Dothideomycetes	Pleosporales	Pleosporaceae	Alternaria	Alternaria leptinellae
New.ReferenceOTU1771	6.87305	0.906509	0.894278	1.01368	0.310737	0.540114	Ascomycota	unidentified	unidentified	unidentified	unidentified	uncultured Ascomycota
New.ReferenceOTU1468	0.860784	-1.58846	1.56473	-1.01517	0.310027	0.540114	Basidiomycota	Agaricomycetes	Agaricales	unidentified	unidentified	Agaricales sp
New.ReferenceOTU920	38.6333	0.49444	0.495782	0.997292	0.318623	0.550348	Ascomycota	Dothideomycetes	Dothideales	Dothideaceae	Endoconidioma	Endoconidioma populi
New.ReferenceOTU1966	1.08653	0.919674	0.920372	0.999242	0.317678	0.550348	unidentified	unidentified	unidentified	unidentified	unidentified	fungal sp FF_2011
New.ReferenceOTU2317	25.7395	0.483412	0.493543	0.979473	0.327346	0.557241	Ascomycota	Sordariomycetes	Sordariales	Sordariaceae	Sordaria	Sordaria sp SS_1479
New.ReferenceOTU839	7.86632	0.596718	0.60696	0.983126	0.325545	0.557241	Ascomycota	Dothideomycetes	Botryosphaeriales	Botryosphaeriaceae	Diplodia	Diplodia subglobosa
New.ReferenceOTU2431	1.44561	0.71207	0.72748	0.978818	0.32767	0.557241	Ascomycota	Dothideomycetes	Pleosporales	Incertae sedis	Phoma	Phoma sp
New.ReferenceOTU786	5.65694	0.649749	0.662643	0.980543	0.326818	0.557241	unidentified	unidentified	unidentified	unidentified	unidentified	uncultured fungus
New.ReferenceOTU769	8.67933	0.61039	0.619478	0.985329	0.324462	0.557241	Ascomycota	Lecanoromycetes	Ostropales	Stictidaceae	Glomerobolus	Glomerobolus gelineus
New.ReferenceOTU74	2.32471	-0.466387	0.480746	-0.970131	0.331981	0.562836	Ascomycota	Dothideomycetes	Pleosporales	Pleosporaceae	Ulocladium	Ulocladium chartarum
New.ReferenceOTU366	2.79318	1.10788	1.14484	0.967721	0.333184	0.563141	Ascomycota	Dothideomycetes	Patellariales	Patellariaceae	Rhytidhysteron	Rhytidhysteron sp
New.ReferenceOTU1884	0.944973	-1.7329	1.79708	-0.964286	0.334902	0.564073	Basidiomycota	Agaricomycetes	Agaricales	unidentified	unidentified	Agaricales sp
New.ReferenceOTU900	3.17678	-0.494423	0.513669	-0.962533	0.335782	0.564073	Ascomycota	Dothideomycetes	Pleosporales	Incertae sedis	Periconia	Periconia sp
New.ReferenceOTU2126	7.87008	0.306948	0.320295	0.958329	0.337897	0.56466	Ascomycota	Dothideomycetes	Pleosporales	Incertae sedis	Didymella	Didymella sp
New.ReferenceOTU334	0.902364	2.81025	2.93417	0.957766	0.338181	0.56466	Ascomycota	Saccharomycetes	Saccharomycetales	Saccharomycetaceae	Saccharomyces	Saccharomyces eubayanus
New.ReferenceOTU926	1.36916	-0.822479	0.866029	-0.949712	0.342258	0.56947	Ascomycota	Dothideomycetes	unidentified	unidentified	unidentified	Dothideomycetes sp
New.ReferenceOTU2234	1.16557	-1.15473	1.21807	-0.948002	0.343129	0.56947	Ascomycota	Eurotiomycetes	Chaetothyriales	unidentified	unidentified	Chaetothyriales sp
New.ReferenceOTU1847	169.711	-0.556557	0.592096	-0.939978	0.347229	0.574544	Ascomycota	Dothideomycetes	Pleosporales	Sporormiaceae	unidentified	Sporormiaceae sp
New.ReferenceOTU2212	1.5142	1.04104	1.12845	0.922539	0.356248	0.584204	Ascomycota	Dothideomycetes	Capnodiales	Mycosphaerellaceae	unidentified	Mycosphaerellaceae sp
New.ReferenceOTU1200	1.1174	0.865488	0.934975	0.925681	0.354612	0.584204	unidentified	unidentified	unidentified	unidentified	unidentified	uncultured fungus
New.ReferenceOTU909	1.23945	0.610259	0.661418	0.922652	0.356189	0.584204	Ascomycota	Lecanoromycetes	Ostropales	Stictidaceae	Schizoxylon	Schizoxylon albescens
New.ReferenceOTU563	1.29955	-1.24565	1.35352	-0.920303	0.357415	0.584378	Ascomycota	unidentified	unidentified	unidentified	unidentified	Ascomycota sp
New.ReferenceOTU1495	0.833041	0.738585	0.809639	0.91224	0.361642	0.589541	Ascomycota	Pezizomycetes	Pezizales	Pyronemataceae	Pyronema	Pyronema sp GSL5_6_2
New.ReferenceOTU812	1.51889	-0.767458	0.843353	-0.910009	0.362818	0.589713	Ascomycota	Sordariomycetes	Hypocreales	Nectriaceae	Fusarium	Fusarium tricinctum
New.ReferenceOTU1720	0.791622	1.05653	1.16425	0.907482	0.364152	0.589987	Ascomycota	Eurotiomycetes	Chaetothyriales	Herpotrichiellaceae	Phaeococcomyces	Phaeococcomyces aff nigricans P40D010
New.ReferenceOTU2401	0.904564	0.817718	0.90292	0.905637	0.365128	0.589987	Basidiomycota	Ustilaginomycetes	Ustilaginales	Ustilaginaceae	Ustilago	Ustilago maydis
New.ReferenceOTU2503	65.23	0.379759	0.423691	0.896311	0.370087	0.59232	Ascomycota	Dothideomycetes	Dothideales	Dothioraceae	unidentified	Dothioraceae sp
New.ReferenceOTU927	4.73888	0.670251	0.74898	0.894886	0.370848	0.59232	Ascomycota	Dothideomycetes	Pleosporales	Pleosporaceae	unidentified	Pleosporaceae sp
New.ReferenceOTU10	7.91607	-0.601662	0.672367	-0.894841	0.370872	0.59232	Ascomycota	Dothideomycetes	unidentified	unidentified	unidentified	Dothideomycetes sp
New.ReferenceOTU1964	2.47242	0.503218	0.55931	0.899711	0.368274	0.59232	Ascomycota	Dothideomycetes	Dothideales	Dothideaceae	Endoconidioma	Endoconidioma populi
New.ReferenceOTU1253	2.22264	0.717207	0.808231	0.887379	0.374875	0.595262	Ascomycota	Sordariomycetes	Lulworthiales	Lulworthiaceae	Zalerion	Zalerion arboricola
New.ReferenceOTU11	0.890516	1.08012	1.21468	0.889224	0.373883	0.595262	Ascomycota	Lecanoromycetes	Lecanorales	Parmeliaceae	Usnea	Usnea sp F206
New.ReferenceOTU801	3.86905	0.630986	0.715968	0.881304	0.378153	0.598743	Ascomycota	Dothideomycetes	Pleosporales	Corynesporascaceae	Corynespora	Corynespora proliferata
New.ReferenceOTU96	1.10216	0.860048	0.983499	0.874478	0.381858	0.602876	unidentified	unidentified	unidentified	unidentified	unidentified	uncultured fungus
New.CleanUp.ReferenceOTU5030	6.65336	0.673794	0.779763	0.864101	0.387533	0.610087	Ascomycota	Dothideomycetes	Pleosporales	Sporormiaceae	unidentified	Sporormiaceae sp
New.ReferenceOTU2055	2.48961	0.537375	0.623928	0.861277	0.389086	0.610787	Ascomycota	Eurotiomycetes	Chaetothyriales	unidentified	unidentified	Chaetothyriales sp
New.ReferenceOTU1781	2.4306	0.789817	0.922487	0.856182	0.391897	0.613453	unidentified	unidentified	unidentified	unidentified	unidentified	uncultured fungus
New.ReferenceOTU567	2.64421	0.750871	0.88088	0.85241	0.393986	0.614976	Ascomycota	Dothideomycetes	Pleosporales	unidentified	unidentified	Pleosporales sp
New.ReferenceOTU828	1.39854	-0.689942	0.813793	-0.847811	0.396544	0.617219	Ascomycota	Eurotiomycetes	Eurotiales	Trichocomaceae	Talaromyces	Talaromyces amestolkiae
New.ReferenceOTU1235	1.06926	0.866342	1.02844	0.842383	0.399574	0.618566	Ascomycota	Eurotiomycetes	Onygenales	Ajellomycetaceae	Ajellomyces	Ajellomyces capsulatus
New.ReferenceOTU2368	23.578	0.384311	0.456297	0.842238	0.399655	0.618566	Basidiomycota	Ustilaginomycetes	Ustilaginales	Ustilaginaceae	unidentified	Ustilaginaceae sp
New.ReferenceOTU579	69.2662	-0.452988	0.540524	-0.838052	0.402002	0.620456	Ascomycota	Dothideomycetes	Dothideales	Dothioraceae	Aureobasidium	Aureobasidium pullulans
New.ReferenceOTU1802	0.970936	-0.630027	0.75473	-0.834771	0.403846	0.621562	Ascomycota	Dothideomycetes	Pleosporales	Pleosporaceae	Alternaria	Alternaria alternata
New.ReferenceOTU1254	10.4714	-0.601058	0.724041	-0.830143	0.406458	0.623106	Ascomycota	Dothideomycetes	Pleosporales	Sporormiaceae	unidentified	Sporormiaceae sp
New.ReferenceOTU227	2.14677	0.493868	0.595747	0.828989	0.407111	0.623106	Ascomycota	Dothideomycetes	Capnodiales	Mycosphaerellaceae	unidentified	Mycosphaerellaceae sp
New.ReferenceOTU2369	2.19414	0.690824	0.835791	0.826552	0.408491	0.623487	unidentified	unidentified	unidentified	unidentified	unidentified	uncultured fungus
New.ReferenceOTU115	0.788504	0.905958	1.11699	0.81107	0.417326	0.635211	Basidiomycota	Microbotryomycetes	Sporidiobolales	Incertae sedis	Sporobolomyces	Sporobolomyces gracilis
New.ReferenceOTU1442	0.848455	0.841894	1.04563	0.805152	0.420732	0.638632	Ascomycota	Incertae sedis	Incertae sedis	Incertae sedis	Knufia	Knufia sp FH_2012
New.ReferenceOTU857	12.5002	0.654359	0.820775	0.797245	0.425309	0.643511	Ascomycota	Dothideomycetes	Dothideales	unidentified	unidentified	Dothideales sp
New.ReferenceOTU1002	17.3317	0.376636	0.473417	0.79557	0.426282	0.643511	Basidiomycota	Tremellomycetes	Cystofilobasidiales	Cystofilobasidiaceae	Udeniomyces	Udeniomyces pyricola
New.ReferenceOTU616	0.883774	-0.96268	1.21854	-0.790027	0.429512	0.646615	Ascomycota	Leotiomycetes	Helotiales	Dermateaceae	Pezicula	Pezicula sp 3 ICMP 18931
New.ReferenceOTU19	1.88167	0.734294	0.932645	0.787325	0.431092	0.647225	Ascomycota	Dothideomycetes	Capnodiales	unidentified	unidentified	Capnodiales sp
New.ReferenceOTU2308	3.00581	0.511082	0.652327	0.783475	0.433348	0.648844	Basidiomycota	Microbotryomycetes	Sporidiobolales	Incertae sedis	Rhodotorula	Rhodotorula sp DT3
New.ReferenceOTU1089	1.63615	0.554381	0.718961	0.771086	0.440656	0.657998	unidentified	unidentified	unidentified	unidentified	unidentified	fungal sp P1S14
New.ReferenceOTU2482	5.6865	-0.647646	0.849776	-0.762138	0.445978	0.664145	Ascomycota	Dothideomycetes	Pleosporales	Pleosporaceae	Bipolaris	Bipolaris brizae
New.ReferenceOTU675	8.08562	0.55286	0.737358	0.749785	0.453384	0.667091	Ascomycota	Dothideomycetes	Dothideales	unidentified	unidentified	Dothideales sp
New.ReferenceOTU2329	2.94295	-0.570668	0.762491	-0.748426	0.454203	0.667091	Ascomycota	Eurotiomycetes	Eurotiales	Trichocomaceae	Penicillium	Penicillium sp HK80
New.ReferenceOTU2068	7.94818	0.336667	0.449253	0.749393	0.45362	0.667091	Basidiomycota	Agaricomycetes	Agaricales	unidentified	unidentified	Agaricales sp
New.ReferenceOTU2280	170.075	0.236158	0.313474	0.753359	0.451234	0.667091	Basidiomycota	Tremellomycetes	Tremellales	Incertae sedis	Cryptococcus	Cryptococcus victoriae
New.ReferenceOTU1390	1.99389	0.779121	1.03508	0.752715	0.451621	0.667091	Ascomycota	Dothideomycetes	unidentified	unidentified	unidentified	Dothideomycetes sp
New.ReferenceOTU482	5.47495	-0.322751	0.432212	-0.746741	0.45522	0.667091	Ascomycota	Dothideomycetes	Capnodiales	unidentified	unidentified	Capnodiales sp
New.ReferenceOTU2296	1.34948	-0.659861	0.889637	-0.741719	0.458258	0.667989	Ascomycota	Eurotiomycetes	Eurotiales	Trichocomaceae	Aspergillus	Aspergillus tubingensis
New.ReferenceOTU645	2.44739	-0.744008	1.00114	-0.743164	0.457382	0.667989	Ascomycota	Dothideomycetes	Pleosporales	Phaeosphaeriaceae	Phaeosphaeria	Phaeosphaeria sp
New.ReferenceOTU2370	0.82745	0.898922	1.21734	0.73843	0.460253	0.669128	Ascomycota	unidentified	unidentified	unidentified	unidentified	Ascomycota sp
New.ReferenceOTU1458	4.42245	-0.559555	0.760144	-0.736117	0.461659	0.669406	Ascomycota	Dothideomycetes	Capnodiales	unidentified	unidentified	Capnodiales sp
New.ReferenceOTU1100	2.18704	0.607068	0.830293	0.731149	0.464688	0.67203	Ascomycota	Dothideomycetes	Pleosporales	unidentified	unidentified	Pleosporales sp
New.ReferenceOTU728	1.53789	-0.75951	1.04638	-0.725846	0.467933	0.673188	Ascomycota	Dothideomycetes	Pleosporales	Massarinaceae	unidentified	uncultured Saccharicola
New.ReferenceOTU1105	3.79805	-0.711951	0.98083	-0.725866	0.467921	0.673188	unidentified	unidentified	unidentified	unidentified	unidentified	uncultured fungus
New.ReferenceOTU1269	1.06036	0.605991	0.864007	0.701373	0.48307	0.691355	Ascomycota	Dothideomycetes	Capnodiales	Davidiellaceae	Cladosporium	Cladosporium exasperatum
New.ReferenceOTU0	0.981093	0.722895	1.02876	0.702687	0.482251	0.691355	Basidiomycota	Microbotryomycetes	Microbotryales	Microbotryaceae	Sphacelotheca	Sphacelotheca polygoni_persicariae
New.ReferenceOTU2127	1.10653	-0.648957	0.929501	-0.698177	0.485066	0.692413	Basidiomycota	Tremellomycetes	Tremellales	Incertae sedis	Cryptococcus	Cryptococcus dimennae
New.ReferenceOTU774	1.45125	0.541029	0.782472	0.691436	0.489291	0.69664	Basidiomycota	Microbotryomycetes	Sporidiobolales	Incertae sedis	Sporobolomyces	Sporobolomyces coprosmae
New.ReferenceOTU457	2.68763	-0.439753	0.642696	-0.684232	0.493828	0.701287	Ascomycota	Dothideomycetes	Pleosporales	Pleosporaceae	Pleospora	Pleospora herbarum
New.ReferenceOTU642	0.993548	0.66037	0.978896	0.674607	0.499926	0.708121	Ascomycota	Incertae sedis	Incertae sedis	Incertae sedis	Torula	Torula sp
New.CleanUp.ReferenceOTU568	0.847757	-0.509644	0.758734	-0.671703	0.501773	0.708915	Ascomycota	Dothideomycetes	Capnodiales	Davidiellaceae	Cladosporium	Cladosporium exasperatum
New.ReferenceOTU1272	3.96963	-0.363378	0.543733	-0.668303	0.50394	0.710156	Ascomycota	Dothideomycetes	Pleosporales	Pleosporaceae	unidentified	Pleosporaceae sp
New.ReferenceOTU633	10.6489	0.310289	0.465791	0.666154	0.505313	0.710274	Ascomycota	Dothideomycetes	Dothideales	Dothideaceae	Endoconidioma	Endoconidioma populi
New.ReferenceOTU2506	3.17328	0.417395	0.632282	0.660141	0.509163	0.712053	Ascomycota	Dothideomycetes	Capnodiales	Incertae sedis	Toxicocladosporium	Toxicocladosporium banksiae
New.ReferenceOTU2200	2.15302	-0.503769	0.762663	-0.66054	0.508908	0.712053	Ascomycota	Sordariomycetes	unidentified	unidentified	unidentified	Sordariomycetes sp MX17
New.ReferenceOTU2040	1.4911	0.594433	0.916686	0.648458	0.516689	0.718928	Ascomycota	Dothideomycetes	Capnodiales	unidentified	unidentified	Capnodiales sp
New.ReferenceOTU1874	2.50556	0.323329	0.498044	0.649197	0.516211	0.718928	Ascomycota	Dothideomycetes	Dothideales	Dothideaceae	Endoconidioma	Endoconidioma populi
New.ReferenceOTU2196	6.89009	0.359413	0.561863	0.639681	0.52238	0.721382	Ascomycota	Dothideomycetes	Pleosporales	Pleosporaceae	unidentified	Pleosporaceae sp
New.ReferenceOTU218	20.6442	-0.247715	0.386506	-0.640909	0.521582	0.721382	Ascomycota	Sordariomycetes	unidentified	unidentified	unidentified	Sordariomycetes sp
New.ReferenceOTU2080	2.9893	-0.468788	0.729204	-0.642876	0.520305	0.721382	Basidiomycota	Ustilaginomycetes	Ustilaginales	Ustilaginaceae	Ustilago	Ustilago echinata
New.ReferenceOTU2423	3.5091	0.286504	0.452825	0.632704	0.526927	0.725842	Ascomycota	Dothideomycetes	Pleosporales	Pleosporaceae	Ulocladium	Ulocladium chartarum
New.ReferenceOTU244	1.09209	-0.656223	1.06133	-0.618305	0.536374	0.737013	Ascomycota	Sordariomycetes	Xylariales	Diatrypaceae	Eutypella	Eutypella sp MS_2011_F20
New.ReferenceOTU2141	1.13157	0.805613	1.3167	0.611841	0.540643	0.74103	Ascomycota	Dothideomycetes	unidentified	unidentified	unidentified	Dothideomycetes sp
New.ReferenceOTU1805	0.940718	-0.488865	0.821884	-0.59481	0.551971	0.750953	Ascomycota	Sordariomycetes	Diaporthales	Diaporthaceae	Diaporthe	Diaporthe viticola
New.ReferenceOTU3	2.58055	0.373892	0.626201	0.59708	0.550454	0.750953	Ascomycota	unidentified	unidentified	unidentified	unidentified	uncultured Ascomycota
New.CleanUp.ReferenceOTU47	0.994704	-0.451783	0.75739	-0.5965	0.550841	0.750953	Ascomycota	Eurotiomycetes	Eurotiales	Trichocomaceae	Penicillium	Penicillium oxalicum
New.ReferenceOTU1056	26.9098	0.207013	0.356002	0.581495	0.560907	0.76123	Ascomycota	Dothideomycetes	Pleosporales	unidentified	unidentified	Pleosporales sp
New.ReferenceOTU1685	1.80246	0.442035	0.764422	0.578261	0.563088	0.762313	Ascomycota	Leotiomycetes	Helotiales	Incertae sedis	Phacidiella	Phacidiella eucalypti
New.ReferenceOTU1504	3.88896	0.428552	0.746236	0.574284	0.565776	0.764074	Ascomycota	Sordariomycetes	Hypocreales	Hypocreaceae	unidentified	Hypocreaceae sp
New.ReferenceOTU1584	2.16155	-0.473386	0.829489	-0.570696	0.568206	0.76548	Ascomycota	Dothideomycetes	Pleosporales	Sporormiaceae	Sporormiella	Sporormiella australis
New.ReferenceOTU663	1.20694	0.658608	1.16357	0.566022	0.571379	0.767878	Ascomycota	Dothideomycetes	Pleosporales	Sporormiaceae	Preussia	Preussia sp
New.ReferenceOTU1583	7.35081	-0.384192	0.681827	-0.563474	0.573112	0.768333	Ascomycota	Dothideomycetes	Pleosporales	Sporormiaceae	unidentified	Preussia sp BLE35
New.ReferenceOTU121	0.824857	0.565081	1.01737	0.555435	0.578597	0.76907	Ascomycota	unidentified	unidentified	unidentified	unidentified	melanized limestone ascomycete CR_2004
New.ReferenceOTU587	13.1766	0.447527	0.804047	0.556592	0.577806	0.76907	Ascomycota	Dothideomycetes	Pleosporales	Pleosporaceae	Pyrenophora	Pyrenophora bromi
New.ReferenceOTU2315	12.0219	0.306752	0.547734	0.560039	0.575453	0.76907	Ascomycota	Leotiomycetes	Helotiales	Incertae sedis	Glarea	Glarea lozoyensis
New.ReferenceOTU514	7.32545	0.283102	0.51245	0.552449	0.580641	0.76907	Ascomycota	unidentified	unidentified	unidentified	unidentified	ascomycete sp IZ_962
New.ReferenceOTU752	3.26999	0.279498	0.504356	0.554169	0.579463	0.76907	Ascomycota	unidentified	unidentified	unidentified	unidentified	Ascomycota sp
New.ReferenceOTU923	1.20707	0.461443	0.839374	0.549747	0.582493	0.769673	Ascomycota	Sordariomycetes	Coniochaetales	unidentified	unidentified	Coniochaetales sp
New.ReferenceOTU2346	3.41063	0.425198	0.783129	0.542947	0.587166	0.773992	Ascomycota	unidentified	unidentified	unidentified	unidentified	Ascomycota sp
New.ReferenceOTU1015	11.3115	-0.196655	0.374852	-0.524621	0.599847	0.78882	Ascomycota	Dothideomycetes	Pleosporales	Incertae sedis	Periconia	Periconia sp
New.ReferenceOTU668	2.99802	0.404699	0.79065	0.511856	0.608752	0.796933	Ascomycota	Sordariomycetes	Xylariales	Xylariaceae	unidentified	Xylariales sp M71
New.ReferenceOTU2204	1.52243	0.553651	1.08213	0.511632	0.608909	0.796933	Ascomycota	Leotiomycetes	Helotiales	Helotiaceae	unidentified	Helotiaceae sp
New.ReferenceOTU354	1.31324	0.544372	1.0699	0.508808	0.610887	0.797627	Ascomycota	Dothideomycetes	Pleosporales	Leptosphaeriaceae	Leptosphaeria	Leptosphaeria sp
New.ReferenceOTU2235	1.19005	-0.471187	0.955699	-0.493029	0.621992	0.804501	Ascomycota	Dothideomycetes	Botryosphaeriales	Incertae sedis	Homortomyces	Homortomyces combreti
New.ReferenceOTU135	1.31035	-0.530979	1.07386	-0.494459	0.620982	0.804501	Ascomycota	Leotiomycetes	Helotiales	Incertae sedis	Naevala	Naevala sp
New.ReferenceOTU2278	3.17118	0.262362	0.525973	0.498813	0.617911	0.804501	Basidiomycota	unidentified	unidentified	unidentified	unidentified	Basidiomycota sp
New.ReferenceOTU872	9.88617	0.212907	0.43066	0.494374	0.621042	0.804501	Ascomycota	Dothideomycetes	Capnodiales	unidentified	unidentified	Capnodiales sp
New.ReferenceOTU1657	3.46378	0.354844	0.723691	0.490326	0.623903	0.805083	Ascomycota	Dothideomycetes	Capnodiales	unidentified	unidentified	Capnodiales sp M_Camp7
New.ReferenceOTU1225	1.16688	0.61052	1.2519	0.487675	0.62578	0.805618	Ascomycota	Dothideomycetes	Pleosporales	Sporormiaceae	Sporormiella	Sporormiella irregularis
New.ReferenceOTU460	3.96616	0.227336	0.469744	0.483958	0.628415	0.80686	Ascomycota	Sordariomycetes	Hypocreales	Incertae sedis	Sarocladium	Sarocladium zeae
New.CleanUp.ReferenceOTU3229	3.91879	0.235013	0.48739	0.482187	0.629673	0.80686	Ascomycota	Dothideomycetes	Dothideales	Dothideaceae	Endoconidioma	Endoconidioma populi
New.ReferenceOTU1124	1.26032	0.389834	0.81282	0.479607	0.631507	0.807333	Ascomycota	Eurotiomycetes	Chaetothyriales	Herpotrichiellaceae	Capronia	Capronia sp 94006a
New.ReferenceOTU1337	1.51442	1.37567	2.92005	0.471113	0.63756	0.813184	Ascomycota	Dothideomycetes	Botryosphaeriales	Incertae sedis	Homortomyces	Homortomyces combreti
New.ReferenceOTU2221	107.858	-0.166613	0.359293	-0.463725	0.642845	0.81427	Ascomycota	Dothideomycetes	Dothideales	Dothioraceae	Hormonema	Hormonema sp
New.ReferenceOTU174	2.12412	-0.451623	0.969913	-0.465632	0.641479	0.81427	Ascomycota	unidentified	unidentified	unidentified	unidentified	ascomycete sp IZ_1147
New.ReferenceOTU485	2.20098	0.306012	0.655713	0.466685	0.640725	0.81427	unidentified	unidentified	unidentified	unidentified	unidentified	uncultured fungus
New.ReferenceOTU543	1.29825	-0.520216	1.14305	-0.455111	0.64903	0.818959	Ascomycota	Pezizomycetes	Pezizales	Sarcosomataceae	Strumella	Strumella sp olrim138
New.ReferenceOTU1914	0.806018	0.524521	1.15424	0.45443	0.649519	0.818959	Ascomycota	Dothideomycetes	unidentified	unidentified	unidentified	Dothideomycetes sp
New.ReferenceOTU870	1.22398	0.418321	0.930798	0.449422	0.653127	0.821628	Basidiomycota	Agaricomycetes	Agaricales	unidentified	unidentified	Agaricales sp
New.ReferenceOTU389	0.862406	-0.48015	1.09825	-0.437196	0.661969	0.824114	Ascomycota	unidentified	unidentified	unidentified	unidentified	uncultured Ascomycota
New.ReferenceOTU1698	0.808638	0.466414	1.05758	0.441018	0.6592	0.824114	Ascomycota	Dothideomycetes	Pleosporales	unidentified	unidentified	Pleosporales sp
New.ReferenceOTU1211	14.0265	-0.11736	0.269099	-0.436122	0.662748	0.824114	Ascomycota	Dothideomycetes	Pleosporales	Pleosporaceae	Ulocladium	Ulocladium chartarum
New.ReferenceOTU237	2.23807	-0.338189	0.765272	-0.44192	0.658547	0.824114	Ascomycota	Dothideomycetes	Pleosporales	Incertae sedis	Periconia	Periconia sp CY191
New.ReferenceOTU356	1.0104	-0.588103	1.35163	-0.435105	0.663486	0.824114	Zygomycota	Incertae sedis	Mortierellales	Mortierellaceae	unidentified	Mortierellaceae sp
New.ReferenceOTU796	2.54839	-0.502602	1.1573	-0.43429	0.664078	0.824114	Ascomycota	unidentified	unidentified	unidentified	unidentified	Ascomycota sp
New.ReferenceOTU300	1.27437	-0.610787	1.45875	-0.418706	0.675431	0.83632	Ascomycota	Lecanoromycetes	Lecanorales	Ramalinaceae	Ramalina	Ramalina pollinaria
New.ReferenceOTU1888	11.0055	0.161523	0.397269	0.406583	0.684314	0.844028	Basidiomycota	Ustilaginomycetes	Ustilaginales	Ustilaginaceae	unidentified	Ustilaginaceae sp
New.ReferenceOTU2018	3.7321	0.387337	0.972616	0.398243	0.690451	0.844028	Ascomycota	Dothideomycetes	Pleosporales	Pleosporaceae	Pyrenophora	Pyrenophora avenae
New.ReferenceOTU1658	1.08313	-0.267569	0.674269	-0.396828	0.691494	0.844028	Ascomycota	Sordariomycetes	unidentified	unidentified	unidentified	Sordariomycetes sp
New.ReferenceOTU1959	1.27881	0.321604	0.803163	0.400422	0.688846	0.844028	Basidiomycota	Tremellomycetes	Tremellales	Incertae sedis	Cryptococcus	Cryptococcus aureus
New.ReferenceOTU21	1.2901	0.40124	1.01621	0.394841	0.69296	0.844028	Ascomycota	unidentified	unidentified	unidentified	unidentified	Ascomycota sp
New.ReferenceOTU1540	2.08849	-0.330597	0.841795	-0.392729	0.69452	0.844028	Ascomycota	Sordariomycetes	Trichosphaeriales	Incertae sedis	unidentified	Trichosphaeriales sp
New.ReferenceOTU534	1.02523	0.338467	0.864581	0.39148	0.695442	0.844028	Basidiomycota	unidentified	unidentified	unidentified	unidentified	Basidiomycota sp
New.ReferenceOTU1984	2.88751	0.209832	0.517663	0.405345	0.685224	0.844028	Ascomycota	Dothideomycetes	Pleosporales	unidentified	unidentified	Pleosporales sp
New.CleanUp.ReferenceOTU339	1.01611	-0.248139	0.633568	-0.391654	0.695314	0.844028	Ascomycota	Dothideomycetes	Pleosporales	unidentified	unidentified	Pleosporales sp
New.ReferenceOTU662	2.67646	-0.284502	0.749521	-0.379578	0.704258	0.852849	Basidiomycota	Ustilaginomycetes	Ustilaginales	unidentified	unidentified	Ustilaginales sp
New.ReferenceOTU2326	1.31787	0.369442	0.989846	0.373232	0.708976	0.856679	Ascomycota	Sordariomycetes	unidentified	unidentified	unidentified	Sordariomycetes sp
New.ReferenceOTU1890	5.12835	-0.174802	0.484866	-0.360516	0.718461	0.863147	Ascomycota	Dothideomycetes	Pleosporales	Sporormiaceae	unidentified	Sporormiaceae sp
New.ReferenceOTU158	1.33406	0.402509	1.11883	0.359759	0.719028	0.863147	Ascomycota	Dothideomycetes	Dothideales	Dothioraceae	Sydowia	Sydowia japonica
New.ReferenceOTU2131	1.25964	-0.317157	0.878125	-0.361175	0.717969	0.863147	Ascomycota	unidentified	unidentified	unidentified	unidentified	Ascomycota sp
New.ReferenceOTU341	2.56686	0.24001	0.675997	0.355045	0.722556	0.863621	Ascomycota	Dothideomycetes	Pleosporales	Pleosporaceae	Curvularia	Curvularia alcornii
New.ReferenceOTU2387	1.49507	0.245971	0.694261	0.354291	0.72312	0.863621	Ascomycota	Dothideomycetes	Dothideales	Dothioraceae	Aureobasidium	Aureobasidium pullulans
New.ReferenceOTU253	40.3462	-0.216706	0.617639	-0.350862	0.725692	0.863621	Ascomycota	Dothideomycetes	unidentified	unidentified	unidentified	Dothideomycetes sp
New.ReferenceOTU2177	0.816947	0.648089	1.84036	0.352153	0.724724	0.863621	Ascomycota	Dothideomycetes	Myriangiales	Incertae sedis	Endosporium	Endosporium sp
New.ReferenceOTU2078	10.6699	0.233132	0.68053	0.342574	0.731919	0.867284	Ascomycota	Sordariomycetes	Xylariales	Amphisphaeriaceae	Pestalotiopsis	Pestalotiopsis sp HC02
New.ReferenceOTU2447	1.99501	0.225208	0.655675	0.343475	0.731241	0.867284	Ascomycota	Dothideomycetes	unidentified	unidentified	unidentified	Dothideomycetes sp
New.ReferenceOTU1017	0.864246	-0.419278	1.24229	-0.337504	0.735737	0.869938	Basidiomycota	Agaricomycetes	Agaricales	Psathyrellaceae	Parasola	Parasola leiocephala
New.ReferenceOTU854	10.4972	0.168654	0.503592	0.334902	0.737699	0.87039	Ascomycota	Dothideomycetes	Dothideales	Dothioraceae	Hormonema	Hormonema sp F_054,258
New.ReferenceOTU1256	2.73689	-0.224166	0.717462	-0.312444	0.754703	0.877983	Ascomycota	Dothideomycetes	Pleosporales	Pleosporaceae	unidentified	Pleosporaceae sp
New.ReferenceOTU392	1.61484	0.176884	0.555399	0.318482	0.75012	0.877983	Ascomycota	Lecanoromycetes	unidentified	unidentified	unidentified	Lecanoromycetes sp
New.ReferenceOTU378	5.56076	-0.22353	0.69745	-0.320496	0.748592	0.877983	unidentified	unidentified	unidentified	unidentified	unidentified	uncultured fungus
New.ReferenceOTU682	3.02636	0.28512	0.920996	0.309578	0.756882	0.877983	Ascomycota	Dothideomycetes	Pleosporales	unidentified	unidentified	Pleosporales sp
New.ReferenceOTU1717	1.72106	0.469076	1.50678	0.311311	0.755565	0.877983	Ascomycota	Dothideomycetes	Pleosporales	Phaeosphaeriaceae	Phaeosphaeria	Phaeosphaeria padellana
New.ReferenceOTU1444	1.49125	-0.281657	0.904127	-0.311524	0.755402	0.877983	Ascomycota	Sordariomycetes	Xylariales	Diatrypaceae	Diatrypella	Diatrypella sp
New.ReferenceOTU1207	1.98622	0.185324	0.588517	0.3149	0.752837	0.877983	Ascomycota	Dothideomycetes	Dothideales	Dothioraceae	Aureobasidium	Aureobasidium pullulans
New.ReferenceOTU479	4.06609	-0.34002	1.06904	-0.31806	0.750439	0.877983	Ascomycota	Dothideomycetes	Pleosporales	unidentified	unidentified	Pleosporales sp
New.ReferenceOTU1358	41.3612	-0.0595564	0.19814	-0.300577	0.763737	0.884074	Ascomycota	Dothideomycetes	Capnodiales	Davidiellaceae	Davidiella	Davidiella tassiana
New.ReferenceOTU572	3.74636	-0.225812	0.800056	-0.282245	0.777755	0.898413	Basidiomycota	Agaricomycetes	Agaricales	Agaricaceae	Bovista	Bovista paludosa
New.ReferenceOTU725	0.80404	0.316242	1.13624	0.278323	0.780764	0.900002	Basidiomycota	Agaricomycetes	Boletales	Suillaceae	Suillus	Suillus granulatus
New.ReferenceOTU696	1.23931	-0.262304	0.959896	-0.273263	0.784651	0.901316	Basidiomycota	Agaricomycetes	Agaricales	Psathyrellaceae	Coprinellus	Coprinellus impatiens
New.ReferenceOTU1146	3.22508	0.149932	0.554372	0.270453	0.786811	0.901316	Ascomycota	Sordariomycetes	Xylariales	Amphisphaeriaceae	unidentified	Amphisphaeriaceae sp
New.ReferenceOTU2414	2.41131	0.192693	0.710733	0.271119	0.786299	0.901316	Ascomycota	Dothideomycetes	Pleosporales	Pleosporaceae	Bipolaris	Bipolaris cynodontis
New.ReferenceOTU835	1.27089	-0.256265	0.961396	-0.266555	0.789812	0.902876	Ascomycota	Dothideomycetes	Incertae sedis	Incertae sedis	Phaeosclera	Phaeosclera sp
New.ReferenceOTU2327	5.69256	0.168444	0.697226	0.241592	0.809096	0.902974	Basidiomycota	unidentified	unidentified	unidentified	unidentified	uncultured Basidiomycota
New.ReferenceOTU1305	1.3874	0.327966	1.29046	0.254146	0.799382	0.902974	Ascomycota	unidentified	unidentified	unidentified	unidentified	uncultured Ascomycota
New.ReferenceOTU945	6.55337	0.121539	0.51044	0.238105	0.811799	0.902974	Basidiomycota	Ustilaginomycetes	Ustilaginales	Ustilaginaceae	Ustilago	Ustilago filiformis
New.ReferenceOTU149	0.938223	0.291104	1.25184	0.23254	0.816118	0.902974	Ascomycota	Dothideomycetes	Myriangiales	unidentified	unidentified	Myriangiales sp
New.ReferenceOTU1370	12.2946	0.136621	0.551171	0.247874	0.804232	0.902974	Ascomycota	Dothideomycetes	Pleosporales	Pleosporaceae	unidentified	Pleosporaceae sp
New.ReferenceOTU2276	0.951507	-0.236536	0.980273	-0.241296	0.809326	0.902974	Ascomycota	unidentified	unidentified	unidentified	unidentified	Ascomycota sp
New.ReferenceOTU503	1.45427	0.212562	0.886405	0.239802	0.810484	0.902974	Ascomycota	Dothideomycetes	Capnodiales	Mycosphaerellaceae	Ramularia	Ramularia sp
New.ReferenceOTU1368	3.10819	-0.191356	0.778778	-0.245713	0.805904	0.902974	Basidiomycota	Exobasidiomycetes	Microstromatales	Quambalariaceae	Quambalaria	Quambalaria cyanescens
New.ReferenceOTU202	1.37308	0.197257	0.8318	0.237145	0.812545	0.902974	Ascomycota	Dothideomycetes	Pleosporales	Phaeosphaeriaceae	Phaeosphaeria	Phaeosphaeria triglochinicola
New.ReferenceOTU2042	1.32238	0.208665	0.873938	0.238764	0.811289	0.902974	Basidiomycota	Tremellomycetes	Tremellales	Incertae sedis	Cryptococcus	Cryptococcus phenolicus
New.ReferenceOTU1943	23.6646	-0.118571	0.486669	-0.243639	0.80751	0.902974	Ascomycota	unidentified	unidentified	unidentified	unidentified	Ascomycota sp
New.ReferenceOTU1159	1.19606	0.158108	0.637069	0.248181	0.803994	0.902974	Ascomycota	Dothideomycetes	Pleosporales	Incertae sedis	Didymella	Didymella sp
New.ReferenceOTU2172	5.19134	0.146667	0.625843	0.234351	0.814713	0.902974	Ascomycota	Dothideomycetes	Pleosporales	Sporormiaceae	unidentified	Sporormiaceae sp
New.ReferenceOTU1601	5.28224	-0.163656	0.662672	-0.246964	0.804936	0.902974	unidentified	unidentified	unidentified	unidentified	unidentified	fungal sp P1S14
New.ReferenceOTU1296	3.19683	0.148477	0.594517	0.249745	0.802785	0.902974	Basidiomycota	Tremellomycetes	unidentified	unidentified	unidentified	Tremellomycetes sp
New.ReferenceOTU2404	2.21323	0.247385	1.05349	0.234825	0.814344	0.902974	Ascomycota	Dothideomycetes	Dothideales	Dothioraceae	Aureobasidium	Aureobasidium pullulans
New.ReferenceOTU1651	5.0426	-0.0963967	0.431849	-0.223219	0.823365	0.904612	Basidiomycota	Ustilaginomycetes	Ustilaginales	Ustilaginaceae	Sporisorium	Sporisorium puellare
New.ReferenceOTU1163	1.38635	-0.152278	0.667348	-0.228184	0.819503	0.904612	Ascomycota	Dothideomycetes	Pleosporales	Pleosporaceae	Pleospora	Pleospora herbarum
New.ReferenceOTU1162	0.999028	0.162008	0.729142	0.22219	0.824166	0.904612	Ascomycota	Dothideomycetes	Capnodiales	Incertae sedis	Toxicocladosporium	Toxicocladosporium leucadendri
New.ReferenceOTU2398	0.813324	0.303502	1.35116	0.224624	0.822272	0.904612	Ascomycota	Dothideomycetes	Incertae sedis	Micropeltidaceae	Stomiopeltis	Stomiopeltis sp RS52
New.ReferenceOTU894	1.21839	0.185692	0.848489	0.21885	0.826767	0.905663	Basidiomycota	Agaricomycetes	Agaricales	unidentified	unidentified	Agaricales sp
New.ReferenceOTU968	1.43276	-0.156229	0.747149	-0.2091	0.83437	0.912179	Basidiomycota	Agaricomycetes	Agaricales	Agaricaceae	Mycenastrum	Mycenastrum corium
New.ReferenceOTU1950	2.69179	0.255852	1.2572	0.20351	0.838736	0.913328	Ascomycota	Dothideomycetes	unidentified	unidentified	unidentified	Dothideomycetes sp
New.ReferenceOTU1006	1.64296	0.228995	1.12498	0.203554	0.838702	0.913328	Ascomycota	Dothideomycetes	unidentified	unidentified	unidentified	Dothideomycetes sp
New.ReferenceOTU1377	1.08282	-0.160602	0.856243	-0.187566	0.851217	0.923269	Ascomycota	Sordariomycetes	Coniochaetales	Coniochaetaceae	Coniochaeta	Coniochaeta sp
New.ReferenceOTU1722	3.10896	-0.145339	0.773799	-0.187825	0.851014	0.923269	unidentified	unidentified	unidentified	unidentified	unidentified	uncultured fungus
New.ReferenceOTU406	0.931267	0.260838	1.4219	0.183443	0.85445	0.924086	Basidiomycota	Agaricomycetes	Agaricales	unidentified	unidentified	Agaricales sp
New.ReferenceOTU153	1.74419	-0.211587	1.16047	-0.182329	0.855325	0.924086	Basidiomycota	Agaricomycetes	Agaricales	unidentified	unidentified	Agaricales sp
New.ReferenceOTU102	4.29087	-0.113533	0.644675	-0.176109	0.860208	0.927544	Basidiomycota	Tremellomycetes	Tremellales	Incertae sedis	Cryptococcus	Cryptococcus magnus
New.ReferenceOTU1607	0.92654	-0.211706	1.26725	-0.16706	0.867323	0.933389	Ascomycota	Dothideomycetes	Pleosporales	Corynesporascaceae	Corynespora	Corynespora proliferata
New.ReferenceOTU948	1.67363	0.124705	0.781675	0.159535	0.873247	0.936551	Ascomycota	Lecanoromycetes	Ostropales	Stictidaceae	Ostropa	Ostropa barbara
New.ReferenceOTU982	0.815457	0.15184	0.954908	0.15901	0.873661	0.936551	Ascomycota	Sordariomycetes	Hypocreales	Incertae sedis	Stachybotrys	Stachybotrys chartarum
New.ReferenceOTU1348	1.43595	-0.124788	0.799596	-0.156064	0.875982	0.937216	Basidiomycota	Tremellomycetes	Tremellales	Incertae sedis	Cryptococcus	Cryptococcus heimaeyensis
New.ReferenceOTU1164	4.72268	-0.101808	0.688768	-0.147811	0.882492	0.942351	Ascomycota	Sordariomycetes	Incertae sedis	Incertae sedis	Cryptovalsa	Cryptovalsa rabenhorstii
New.ReferenceOTU1238	0.8944	-0.167657	1.17452	-0.142745	0.886491	0.942967	Ascomycota	Saccharomycetes	Saccharomycetales	Incertae sedis	Candida	Candida smithsonii
New.ReferenceOTU2488	11.4956	-0.0795782	0.553867	-0.143678	0.885755	0.942967	Basidiomycota	Tremellomycetes	Tremellales	Incertae sedis	Cryptococcus	Cryptococcus laurentii
New.ReferenceOTU2307	2.56117	0.100807	0.761903	0.13231	0.894739	0.944447	Ascomycota	Dothideomycetes	Pleosporales	Pleosporaceae	Embellisia	Embellisia planifunda
New.ReferenceOTU2461	1.28087	0.129071	0.940143	0.137289	0.890802	0.944447	Ascomycota	Taphrinomycetes	Taphrinales	Taphrinaceae	Lalaria	Lalaria carpini
New.ReferenceOTU1395	13.7817	-0.112834	0.838028	-0.134643	0.892894	0.944447	Ascomycota	Dothideomycetes	Pleosporales	Pleosporaceae	unidentified	Pleosporaceae sp
New.CleanUp.ReferenceOTU2766	0.821024	0.112075	0.845777	0.132512	0.89458	0.944447	Ascomycota	Dothideomycetes	Pleosporales	Incertae sedis	Didymella	Didymella sp
New.ReferenceOTU512	1.32483	0.21628	1.69122	0.127884	0.898241	0.94633	Ascomycota	Dothideomycetes	Hysteriales	Gloniaceae	Cenococcum	uncultured Cenococcum
New.ReferenceOTU497	5.74039	-0.0801857	0.653028	-0.122791	0.902273	0.946957	Ascomycota	Dothideomycetes	Pleosporales	Pleosporaceae	Stemphylium	Stemphylium loti
New.ReferenceOTU262	0.963575	-0.115624	0.933162	-0.123906	0.90139	0.946957	Ascomycota	Eurotiomycetes	Chaetothyriales	Herpotrichiellaceae	unidentified	Herpotrichiellaceae sp
New.ReferenceOTU1905	38.9607	0.093582	0.847691	0.110396	0.912095	0.955446	Basidiomycota	Agaricomycetes	Agaricales	Agaricaceae	Calvatia	Calvatia pachydermica
New.ReferenceOTU144	16.4616	-0.0512235	0.48989	-0.104561	0.916724	0.956036	Ascomycota	Dothideomycetes	Pleosporales	Phaeosphaeriaceae	Sclerostagonospora	Sclerostagonospora sp
New.ReferenceOTU2491	2.79242	0.0676193	0.669904	0.100939	0.919599	0.956036	Ascomycota	Dothideomycetes	Pleosporales	Pleosporaceae	unidentified	Pleosporaceae sp
New.ReferenceOTU1951	3.16809	-0.0852621	0.838923	-0.101633	0.919048	0.956036	Ascomycota	Dothideomycetes	Pleosporales	Pleosporaceae	Pyrenophora	Pyrenophora lolii
New.ReferenceOTU1455	1.62306	-0.083746	0.801353	-0.104506	0.916768	0.956036	Ascomycota	Lecanoromycetes	Ostropales	Stictidaceae	unidentified	Stictidaceae sp
New.ReferenceOTU527	1.14354	-0.0933239	0.981254	-0.0951067	0.92423	0.957238	Ascomycota	Lecanoromycetes	unidentified	unidentified	unidentified	Lecanoromycetes sp
New.ReferenceOTU481	2.1932	0.111203	1.15214	0.0965187	0.923109	0.957238	Ascomycota	Dothideomycetes	Dothideales	Dothideaceae	Endoconidioma	Endoconidioma populi
New.ReferenceOTU1328	4.8686	0.0485661	0.549775	0.0883382	0.929608	0.957409	Ascomycota	Dothideomycetes	Dothideales	Dothideaceae	Endoconidioma	Endoconidioma populi
New.ReferenceOTU1208	1.87664	-0.0788162	0.857707	-0.0918918	0.926784	0.957409	unidentified	unidentified	unidentified	unidentified	unidentified	fungal sp ARIZ AZ1110
New.ReferenceOTU38	3.3428	0.0785555	0.874994	0.0897784	0.928463	0.957409	Basidiomycota	Pucciniomycetes	Pucciniales	Uropyxidaceae	Tranzschelia	Tranzschelia discolor
New.ReferenceOTU770	3.06025	0.0667228	0.88415	0.0754655	0.939844	0.962554	Ascomycota	Sordariomycetes	Sordariales	Lasiosphaeriaceae	unidentified	Lasiosphaeriaceae sp
New.ReferenceOTU2425	0.857422	0.0821758	1.06917	0.0768594	0.938735	0.962554	Ascomycota	Sordariomycetes	Xylariales	Xylariaceae	Barrmaelia	Barrmaelia macrospora
New.ReferenceOTU1049	1.07636	-0.0697156	0.920702	-0.07572	0.939642	0.962554	Basidiomycota	Agaricomycetes	Agaricales	Psathyrellaceae	Coprinopsis	Coprinopsis radiata
New.ReferenceOTU411	3.3661	-0.0621438	0.864014	-0.0719245	0.942662	0.963649	Ascomycota	Dothideomycetes	Pleosporales	Pleosporaceae	Curvularia	Curvularia spicifera
New.ReferenceOTU929	8.25773	0.0279803	0.480906	0.0581823	0.953603	0.968469	Ascomycota	Sordariomycetes	Xylariales	Diatrypaceae	unidentified	Diatrypaceae sp
New.ReferenceOTU2209	1.3693	0.0593195	1.00933	0.0587713	0.953134	0.968469	Ascomycota	Dothideomycetes	Capnodiales	Incertae sedis	Meristemomyces	Meristemomyces frigidus
New.ReferenceOTU540	3.3772	0.165756	2.89924	0.0571722	0.954408	0.968469	Ascomycota	Dothideomycetes	Botryosphaeriales	Aplosporellaceae	Aplosporella	Aplosporella javeedii
New.ReferenceOTU2088	1.15588	0.0722448	1.24581	0.05799	0.953757	0.968469	Ascomycota	Dothideomycetes	Pleosporales	Sporormiaceae	Preussia	Preussia tetramera
New.ReferenceOTU1423	1.17613	-0.0461491	0.914767	-0.050449	0.959765	0.970698	Basidiomycota	Tremellomycetes	Tremellales	Incertae sedis	Cryptococcus	Cryptococcus oeirensis
New.ReferenceOTU896	0.940435	-0.0542081	1.11606	-0.0485711	0.961261	0.970698	Ascomycota	Lecanoromycetes	Teloschistales	Physciaceae	Physcia	Physcia leptalea
New.ReferenceOTU1545	3.07277	0.0373242	0.781126	0.0477826	0.961889	0.970698	Ascomycota	Dothideomycetes	Pleosporales	Pleosporaceae	Bipolaris	Bipolaris melinidis
New.ReferenceOTU2138	1.19941	-0.0308922	0.707122	-0.0436872	0.965154	0.972212	Basidiomycota	Agaricomycetes	Agaricales	Strophariaceae	Gymnopilus	Gymnopilus junonius
New.ReferenceOTU337	1.52744	0.0274228	0.755442	0.0363003	0.971043	0.976359	unidentified	unidentified	unidentified	unidentified	unidentified	uncultured fungus
New.ReferenceOTU1792	1.12859	-0.0310864	1.11805	-0.0278042	0.977818	0.980946	Ascomycota	Dothideomycetes	Pleosporales	Phaeosphaeriaceae	Sclerostagonospora	Sclerostagonospora sp
New.ReferenceOTU756	1.12349	-0.0331904	1.27095	-0.0261146	0.979166	0.980946	Ascomycota	Sordariomycetes	Xylariales	unidentified	unidentified	Xylariales sp
New.ReferenceOTU2479	5.15459	-0.00516864	0.511789	-0.0100992	0.991942	0.991942	Ascomycota	Dothideomycetes	Dothideales	Dothioraceae	Sydowia	Sydowia sp
New.ReferenceOTU917	0	NA	NA	NA	NA	NA	Ascomycota	Dothideomycetes	Incertae sedis	Micropeltidaceae	Stomiopeltis	Stomiopeltis sp T36A1b
New.ReferenceOTU918	0.0163294	-0.792433	2.96374	-0.267376	0.78918	NA	Ascomycota	Dothideomycetes	Capnodiales	Mycosphaerellaceae	Xenosonderhenia	Xenosonderhenia syzygii
New.ReferenceOTU2194	0.702188	-1.10371	1.65896	-0.6653	0.505858	NA	Ascomycota	Dothideomycetes	Incertae sedis	Incertae sedis	Asteromella	Asteromella sp
New.ReferenceOTU2191	0.76461	1.21698	1.22176	0.99609	0.319206	NA	unidentified	unidentified	unidentified	unidentified	unidentified	uncultured fungus
New.ReferenceOTU2352	0.620022	0.878931	1.50933	0.582332	0.560343	NA	Ascomycota	Dothideomycetes	Pleosporales	Incertae sedis	Phoma	Phoma sp A15
New.ReferenceOTU1889	0.358494	1.27193	2.33854	0.543901	0.58651	NA	Ascomycota	Dothideomycetes	Capnodiales	Teratosphaeriaceae	unidentified	uncultured Teratosphaeriaceae
New.ReferenceOTU1267	0.334033	0.00887078	1.54893	0.00572705	0.99543	NA	Ascomycota	Eurotiomycetes	Chaetothyriales	unidentified	unidentified	Chaetothyriales sp
New.ReferenceOTU1066	0.644277	-2.29321	1.58578	-1.4461	0.148148	NA	Basidiomycota	Agaricomycetes	Agaricales	Agaricaceae	Bovista	Bovista promontorii
New.ReferenceOTU1064	0.507593	-0.926081	1.9824	-0.467151	0.640392	NA	Ascomycota	Lecanoromycetes	unidentified	unidentified	unidentified	Lecanoromycetes sp
New.ReferenceOTU679	0.473524	0.536336	1.71321	0.313059	0.754236	NA	Ascomycota	Dothideomycetes	unidentified	unidentified	unidentified	Dothideomycetes sp
New.ReferenceOTU1405	0.0757203	-0.471837	2.96374	-0.159203	0.873509	NA	unidentified	unidentified	unidentified	unidentified	unidentified	fungal endophyte
New.ReferenceOTU1407	0.628027	0.0360837	1.1224	0.0321486	0.974354	NA	Ascomycota	Dothideomycetes	Capnodiales	unidentified	unidentified	Capnodiales sp
New.ReferenceOTU1311	0.28077	0.473034	1.68799	0.280235	0.779297	NA	Ascomycota	unidentified	unidentified	unidentified	unidentified	uncultured Pezizomycotina
New.ReferenceOTU451	0	NA	NA	NA	NA	NA	Basidiomycota	Agaricomycetes	Auriculariales	Incertae sedis	Elmerina	Elmerina holophaea
New.ReferenceOTU1087	0.19794	0.227259	2.51165	0.090482	0.927904	NA	Ascomycota	Dothideomycetes	Dothideales	Dothioraceae	Aureobasidium	Aureobasidium pullulans
New.ReferenceOTU293	0.481738	-0.486858	2.40645	-0.202314	0.839671	NA	unidentified	unidentified	unidentified	unidentified	unidentified	fungal sp TRN254
New.ReferenceOTU852	0.678358	1.185	1.4396	0.823143	0.410427	NA	Ascomycota	Dothideomycetes	Capnodiales	Teratosphaeriaceae	Catenulostroma	Catenulostroma hermanusense
New.ReferenceOTU855	0.121068	-0.354465	2.79913	-0.126634	0.89923	NA	Ascomycota	Dothideomycetes	unidentified	unidentified	unidentified	Dothideomycetes sp
New.ReferenceOTU858	0.55118	-0.209711	2.26992	-0.0923869	0.926391	NA	Basidiomycota	Microbotryomycetes	Sporidiobolales	Incertae sedis	Rhodotorula	Rhodotorula nothofagi
New.ReferenceOTU1729	0.438671	0.661401	1.207	0.547972	0.583711	NA	Ascomycota	Sordariomycetes	Hypocreales	Incertae sedis	Acremonium	Acremonium implicatum
New.ReferenceOTU925	0.0639458	0.00727728	2.96348	0.00245565	0.998041	NA	Ascomycota	unidentified	unidentified	unidentified	unidentified	uncultured Pezizomycotina
New.ReferenceOTU924	0.708564	-0.751411	1.22625	-0.612771	0.540028	NA	Basidiomycota	Agaricomycetes	Russulales	Peniophoraceae	Dendrophora	Dendrophora sp
New.ReferenceOTU617	0.378881	0.259157	1.49424	0.173437	0.862308	NA	Ascomycota	unidentified	unidentified	unidentified	unidentified	Ascomycota sp
New.ReferenceOTU1249	0.0922501	-0.924672	2.96242	-0.312135	0.754938	NA	Ascomycota	unidentified	unidentified	unidentified	unidentified	uncultured Ascomycota
New.ReferenceOTU2037	0.497181	0.715614	1.5732	0.454879	0.649197	NA	Ascomycota	unidentified	unidentified	unidentified	unidentified	Ascomycota sp
New.ReferenceOTU2031	0.481021	0.899169	1.48829	0.604164	0.545735	NA	Basidiomycota	Pucciniomycetes	Pucciniales	Incertae sedis	Aecidium	Aecidium sp PUR 43011
New.ReferenceOTU1244	0	NA	NA	NA	NA	NA	Ascomycota	unidentified	unidentified	unidentified	unidentified	Ascomycota sp
New.ReferenceOTU1071	0	0	0	0	1	NA	Ascomycota	Incertae sedis	Incertae sedis	Incertae sedis	Vermispora	Vermispora spermatophaga
New.ReferenceOTU1070	0.157529	0.840533	2.95772	0.284183	0.77627	NA	Ascomycota	Dothideomycetes	Capnodiales	Mycosphaerellaceae	Pseudocercospora	Pseudocercospora opuntia
New.ReferenceOTU1072	0.0316324	-0.297924	2.96407	-0.100512	0.919938	NA	Ascomycota	Lecanoromycetes	Teloschistales	Physciaceae	Hyperphyscia	Hyperphyscia adglutinata
New.ReferenceOTU1077	0.182749	0.0444887	2.52203	0.01764	0.985926	NA	Basidiomycota	Exobasidiomycetes	Exobasidiales	Exobasidiaceae	Exobasidium	Exobasidium yoshinagae
New.ReferenceOTU1677	0.120395	-0.838904	2.9627	-0.283155	0.777058	NA	Ascomycota	Dothideomycetes	Pleosporales	Pleosporaceae	Alternaria	Alternaria helianthiinficiens
New.ReferenceOTU1676	0.024883	-0.297924	2.96407	-0.100512	0.919938	NA	Basidiomycota	Microbotryomycetes	Sporidiobolales	Incertae sedis	Rhodotorula	Rhodotorula armeniaca
New.ReferenceOTU1411	0.345347	0.73136	1.65435	0.442083	0.658429	NA	Basidiomycota	Agaricostilbomycetes	unidentified	unidentified	unidentified	Agaricostilbomycetes sp
New.ReferenceOTU1410	0.45442	-1.47056	2.05182	-0.716707	0.473555	NA	Ascomycota	unidentified	unidentified	unidentified	unidentified	uncultured Ascomycota
New.ReferenceOTU306	0.0851795	0.107799	2.96304	0.0363812	0.970978	NA	Ascomycota	Dothideomycetes	Capnodiales	Davidiellaceae	Cladosporium	Cladosporium exasperatum
New.ReferenceOTU1307	0.326306	0.841378	1.24124	0.677852	0.497865	NA	unidentified	unidentified	unidentified	unidentified	unidentified	uncultured fungus
New.ReferenceOTU1302	0.611848	-2.4129	1.58539	-1.52195	0.128021	NA	Ascomycota	Eurotiomycetes	Eurotiales	Trichocomaceae	Penicillium	Penicillium bialowiezense
New.ReferenceOTU1301	0.331212	0.061186	1.26042	0.048544	0.961283	NA	Ascomycota	Dothideomycetes	unidentified	unidentified	unidentified	Dothideomycetes sp
New.ReferenceOTU116	0.342493	-0.511343	1.4872	-0.34383	0.730974	NA	Ascomycota	Dothideomycetes	Capnodiales	unidentified	unidentified	Capnodiales sp
New.ReferenceOTU1092	0.0667839	-0.971812	2.9633	-0.327949	0.74295	NA	Ascomycota	Sordariomycetes	unidentified	unidentified	unidentified	Sordariomycetes sp
New.ReferenceOTU1546	0.114897	0.434702	2.96092	0.146813	0.88328	NA	Ascomycota	Dothideomycetes	Capnodiales	Teratosphaeriaceae	unidentified	Teratosphaeriaceae sp
New.ReferenceOTU843	0.754591	-1.10045	1.12164	-0.981101	0.326543	NA	Ascomycota	Sordariomycetes	Microascales	Microascaceae	Microascus	Microascus brevicaulis
New.ReferenceOTU931	0.0886397	-0.811514	2.9633	-0.273854	0.784197	NA	Ascomycota	Dothideomycetes	Capnodiales	Mycosphaerellaceae	Septoria	cf Septoria sp CBS 134910
New.ReferenceOTU2025	0.211904	0.61612	2.22813	0.276519	0.78215	NA	Ascomycota	Saccharomycetes	Saccharomycetales	Saccharomycetaceae	Tetrapisispora	Tetrapisispora blattae
New.ReferenceOTU353	0	NA	NA	NA	NA	NA	Ascomycota	Orbiliomycetes	unidentified	unidentified	unidentified	Orbiliomycetes sp
New.ReferenceOTU141	0.363893	1.17441	1.83919	0.638549	0.523117	NA	Ascomycota	Lecanoromycetes	Lecanorales	Incertae sedis	Solenopsora	Solenopsora holophaea
New.ReferenceOTU1935	0.364412	-0.349042	1.73706	-0.200938	0.840747	NA	Basidiomycota	Agaricomycetes	Agaricales	Psathyrellaceae	Coprinopsis	Coprinopsis phlyctidospora
New.ReferenceOTU1930	0.650332	2.32158	1.4722	1.57695	0.114808	NA	Ascomycota	Dothideomycetes	Pleosporales	Phaeosphaeriaceae	Sclerostagonospora	Sclerostagonospora sp
New.ReferenceOTU614	0.216091	0.226139	2.17085	0.104171	0.917034	NA	Ascomycota	Dothideomycetes	Capnodiales	Incertae sedis	Capnobotryella	Capnobotryella sp
New.ReferenceOTU1241	0.117082	-0.440701	2.96333	-0.148718	0.881776	NA	Ascomycota	Dothideomycetes	Dothideales	Dothioraceae	Aureobasidium	Aureobasidium sp
New.ReferenceOTU1428	0.0363326	-0.297924	2.96407	-0.100512	0.919938	NA	unidentified	unidentified	unidentified	unidentified	unidentified	fungal sp FG7
New.ReferenceOTU1331	0.0342504	-0.13477	2.96399	-0.045469	0.963733	NA	Basidiomycota	Microbotryomycetes	Sporidiobolales	Incertae sedis	Rhodotorula	Rhodotorula aurantiaca
New.ReferenceOTU1338	0.0157714	-0.458222	2.96407	-0.154592	0.877143	NA	Ascomycota	Dothideomycetes	Capnodiales	Teratosphaeriaceae	unidentified	Teratosphaeriaceae sp
New.ReferenceOTU2522	0.568878	0.641601	1.26311	0.507951	0.611487	NA	Ascomycota	unidentified	unidentified	unidentified	unidentified	Ascomycota sp
New.ReferenceOTU439	0.20022	-0.134487	2.1748	-0.061839	0.950691	NA	Ascomycota	Dothideomycetes	Capnodiales	Mycosphaerellaceae	Passalora	Passalora zambiae
New.ReferenceOTU431	0	NA	NA	NA	NA	NA	Ascomycota	Sordariomycetes	Hypocreales	Incertae sedis	Acremonium	Acremonium sp
New.ReferenceOTU122	0.423649	-0.12623	1.59145	-0.0793174	0.93678	NA	Ascomycota	unidentified	unidentified	unidentified	unidentified	Ascomycota sp
New.ReferenceOTU124	0.23413	-0.194678	1.9422	-0.100236	0.920157	NA	Ascomycota	unidentified	unidentified	unidentified	unidentified	Ascomycota sp
New.ReferenceOTU2238	0.190506	-1.28033	2.24408	-0.570538	0.568313	NA	Ascomycota	Lecanoromycetes	Ostropales	Stictidaceae	unidentified	Stictidaceae sp
New.ReferenceOTU949	0.318358	-0.504608	1.78961	-0.281966	0.77797	NA	unidentified	unidentified	unidentified	unidentified	unidentified	Fungi sp
New.ReferenceOTU1921	0.308538	1.17268	2.11522	0.554403	0.579303	NA	Ascomycota	Dothideomycetes	Capnodiales	Mycosphaerellaceae	Mycosphaerella	Mycosphaerella sp CPC 12200
New.ReferenceOTU601	0.0489883	-1.12241	2.96283	-0.378832	0.704813	NA	Ascomycota	Incertae sedis	Incertae sedis	Incertae sedis	Knufia	Knufia sp
New.ReferenceOTU1656	0.690891	2.3223	1.21113	1.91746	0.0551797	NA	Ascomycota	Dothideomycetes	unidentified	unidentified	unidentified	Dothideomycetes sp
New.ReferenceOTU1431	0.0233232	-0.297924	2.96407	-0.100512	0.919938	NA	Basidiomycota	Tremellomycetes	Tremellales	Incertae sedis	Cryptococcus	Cryptococcus sp CBS 12710
New.ReferenceOTU1430	0.153361	-0.316212	2.73091	-0.11579	0.907819	NA	Ascomycota	Dothideomycetes	Capnodiales	Davidiellaceae	Davidiella	Davidiella tassiana
New.ReferenceOTU1436	0.520972	1.48796	0.912672	1.63033	0.103031	NA	Ascomycota	Sordariomycetes	Sordariales	Sordariaceae	Neurospora	Neurospora crassa
New.ReferenceOTU738	0	NA	NA	NA	NA	NA	Ascomycota	Dothideomycetes	Capnodiales	unidentified	unidentified	Capnodiales sp
New.ReferenceOTU730	0.66638	1.19684	1.52147	0.786637	0.431494	NA	Ascomycota	unidentified	unidentified	unidentified	unidentified	Ascomycota sp
New.ReferenceOTU425	0.119616	-0.0942436	2.96131	-0.031825	0.974612	NA	Ascomycota	Eurotiomycetes	Onygenales	Ajellomycetaceae	Ajellomyces	Ajellomyces capsulatus
New.ReferenceOTU427	0.14606	0.61825	2.69184	0.229676	0.818344	NA	Ascomycota	Dothideomycetes	Myriangiales	Elsinoaceae	unidentified	Elsinoaceae sp KNUC262
New.ReferenceOTU421	0.0163294	-0.792433	2.96374	-0.267376	0.78918	NA	Ascomycota	unidentified	unidentified	unidentified	unidentified	ascomycete sp MA 4905
New.ReferenceOTU133	0	NA	NA	NA	NA	NA	unidentified	unidentified	unidentified	unidentified	unidentified	uncultured fungus
New.ReferenceOTU1744	0.0834529	-0.0821435	2.96308	-0.0277223	0.977884	NA	Ascomycota	Dothideomycetes	Capnodiales	Capnodiaceae	Capnodium	Capnodium coffeae
New.ReferenceOTU2309	0.626497	1.04824	1.04328	1.00476	0.315014	NA	Ascomycota	Dothideomycetes	unidentified	unidentified	unidentified	Dothideomycetes sp
New.ReferenceOTU2228	0.477114	1.43844	1.80859	0.795338	0.426417	NA	Ascomycota	Lecanoromycetes	Peltigerales	Pannariaceae	Degelia	Degelia plumbea
New.ReferenceOTU586	0.545252	1.65767	1.79659	0.922678	0.356175	NA	Ascomycota	Dothideomycetes	Capnodiales	Teratosphaeriaceae	unidentified	Teratosphaeriaceae sp
New.ReferenceOTU2002	0	NA	NA	NA	NA	NA	Basidiomycota	Agaricomycetes	Agaricales	unidentified	unidentified	Agaricales sp
New.ReferenceOTU1916	0.561666	0.52647	1.44877	0.363391	0.716313	NA	Ascomycota	Eurotiomycetes	Chaetothyriales	unidentified	unidentified	Chaetothyriales sp
New.ReferenceOTU639	0.456482	0.444723	1.82042	0.244298	0.807	NA	Ascomycota	Dothideomycetes	Capnodiales	unidentified	unidentified	Capnodiales sp
New.ReferenceOTU632	0.181242	-0.187442	1.96745	-0.0952715	0.924099	NA	Ascomycota	Dothideomycetes	Capnodiales	Mycosphaerellaceae	Mycosphaerella	Mycosphaerella sp MUCC573
New.ReferenceOTU637	0.479059	-0.553027	1.0615	-0.520987	0.602376	NA	Ascomycota	Dothideomycetes	Capnodiales	unidentified	unidentified	Capnodiales sp
New.ReferenceOTU1684	0.0863905	-1.06331	2.96249	-0.358923	0.719652	NA	Ascomycota	Dothideomycetes	Pleosporales	unidentified	unidentified	Pleosporales sp
New.ReferenceOTU1136	0.122201	0.473158	2.96066	0.159815	0.873027	NA	Ascomycota	Dothideomycetes	Botryosphaeriales	Botryosphaeriaceae	Lasiodiplodia	Lasiodiplodia rubropurpurea
New.ReferenceOTU1689	0.622594	0.123516	2.54164	0.0485968	0.961241	NA	unidentified	unidentified	unidentified	unidentified	unidentified	uncultured fungus
New.ReferenceOTU1130	0.679407	0.508426	1.16681	0.435739	0.663026	NA	Basidiomycota	Agaricomycetes	Agaricales	Agaricaceae	Coprinus	Coprinus foetidellus
New.ReferenceOTU1131	0.249843	-1.99522	2.95904	-0.674278	0.500135	NA	Ascomycota	Eurotiomycetes	Chaetothyriales	Herpotrichiellaceae	Phaeomoniella	Phaeomoniella sp
New.ReferenceOTU709	0.742405	1.81067	0.97993	1.84776	0.0646372	NA	Ascomycota	unidentified	unidentified	unidentified	unidentified	uncultured Ascomycota
New.ReferenceOTU708	0.717895	1.46165	1.08308	1.34953	0.177167	NA	Ascomycota	Dothideomycetes	unidentified	unidentified	unidentified	Dothideomycetes sp
New.ReferenceOTU704	0.15612	0.724657	2.95866	0.244927	0.806513	NA	unidentified	unidentified	unidentified	unidentified	unidentified	Fungi sp
New.ReferenceOTU1350	0.412427	-1.86522	1.61101	-1.15779	0.24695	NA	Ascomycota	Eurotiomycetes	Chaetothyriales	Herpotrichiellaceae	Exophiala	Exophiala sp
New.ReferenceOTU381	0.43126	1.97662	2.01186	0.982483	0.325862	NA	Basidiomycota	Tremellomycetes	Tremellales	unidentified	unidentified	Tremellales sp
New.ReferenceOTU147	0.199856	0.990917	2.53041	0.391603	0.695351	NA	Ascomycota	Dothideomycetes	Pleosporales	Leptosphaeriaceae	Plenodomus	Plenodomus enteroleucus
New.ReferenceOTU410	0.355503	-0.36687	1.89383	-0.193719	0.846396	NA	Ascomycota	Lecanoromycetes	Candelariales	Candelariaceae	Candelaria	Candelaria pacifica
New.ReferenceOTU148	0.593786	0.312554	1.32028	0.236732	0.812864	NA	Ascomycota	unidentified	unidentified	unidentified	unidentified	uncultured Pezizomycotina
New.ReferenceOTU2495	0.159625	-0.516072	2.27331	-0.227014	0.820413	NA	Ascomycota	Dothideomycetes	Dothideales	Dothioraceae	Aureobasidium	Aureobasidium pullulans
New.ReferenceOTU2492	0.0842867	-0.811514	2.9633	-0.273854	0.784197	NA	Basidiomycota	Agaricomycetes	Agaricales	unidentified	unidentified	Agaricales sp
New.ReferenceOTU2490	0.771157	1.77598	1.18877	1.49397	0.135184	NA	Ascomycota	Dothideomycetes	Capnodiales	unidentified	unidentified	Capnodiales sp
New.ReferenceOTU2254	0.564634	1.114	1.34885	0.82589	0.408867	NA	Ascomycota	Lecanoromycetes	Candelariales	Candelariaceae	Candelariella	Candelariella rosulans
New.ReferenceOTU898	0.770835	-1.02296	2.03699	-0.502191	0.615533	NA	Basidiomycota	Agaricomycetes	Agaricales	Agaricaceae	Coprinus	Coprinus comatus
New.ReferenceOTU2262	0.215864	-0.864165	2.44801	-0.353007	0.724083	NA	Ascomycota	Eurotiomycetes	Eurotiales	Trichocomaceae	Aspergillus	Aspergillus sp YM3
New.ReferenceOTU560	0.146732	0.768753	2.95829	0.259864	0.794969	NA	Basidiomycota	Tremellomycetes	Tremellales	Incertae sedis	Bullera	Bullera dendrophila
New.ReferenceOTU568	0.124797	-0.347896	2.96273	-0.117424	0.906524	NA	unidentified	unidentified	unidentified	unidentified	unidentified	uncultured fungus
New.ReferenceOTU109	0.64994	1.64708	1.04863	1.5707	0.116251	NA	Ascomycota	Dothideomycetes	Pleosporales	Montagnulaceae	Paraconiothyrium	Paraconiothyrium hawaiiense
New.ReferenceOTU965	0.521576	1.00884	1.11163	0.907529	0.364127	NA	unidentified	unidentified	unidentified	unidentified	unidentified	uncultured ectomycorrhizal fungus
New.ReferenceOTU967	0.700353	-1.35126	1.43869	-0.939233	0.347611	NA	Ascomycota	unidentified	unidentified	unidentified	unidentified	uncultured Ascomycota
New.ReferenceOTU2079	0.472168	-0.49654	1.25588	-0.395373	0.692568	NA	Ascomycota	Dothideomycetes	Capnodiales	unidentified	unidentified	Capnodiales sp
New.ReferenceOTU2106	0.774044	2.25132	1.23833	1.81803	0.0690596	NA	unidentified	unidentified	unidentified	unidentified	unidentified	fungal sp EXP0528F
New.ReferenceOTU2100	0.219159	0.403947	1.92629	0.209702	0.8339	NA	Basidiomycota	Agaricostilbomycetes	Agaricostilbales	Agaricostilbaceae	Bensingtonia	Bensingtonia phyllada
New.ReferenceOTU2108	0.312954	0.287842	2.10733	0.136591	0.891354	NA	Ascomycota	Dothideomycetes	Dothideales	Dothioraceae	Pringsheimia	Pringsheimia sp
New.ReferenceOTU1902	0.189654	0.184594	2.95733	0.0624192	0.950229	NA	Ascomycota	Lecanoromycetes	unidentified	unidentified	unidentified	Lecanoromycetes sp
New.ReferenceOTU626	0.349928	0.0131464	1.41839	0.00926855	0.992605	NA	Ascomycota	Dothideomycetes	Pleosporales	unidentified	unidentified	Pleosporales sp
New.ReferenceOTU624	0.514136	-1.61069	1.4743	-1.09252	0.274606	NA	Ascomycota	Dothideomycetes	Pleosporales	Phaeosphaeriaceae	Stagonospora	Stagonospora pseudovitensis
New.ReferenceOTU620	0.0843065	-0.186432	2.96232	-0.0629344	0.949819	NA	Ascomycota	Dothideomycetes	Capnodiales	Capnodiaceae	Capnodium	Capnodium sp FF_2011
New.ReferenceOTU1237	0.449706	0.771839	1.17949	0.654382	0.512866	NA	Ascomycota	Dothideomycetes	Pleosporales	unidentified	unidentified	Pleosporales sp GS3_3_5
New.ReferenceOTU1239	0.0216806	-0.297924	2.96407	-0.100512	0.919938	NA	Basidiomycota	Tremellomycetes	unidentified	unidentified	unidentified	uncultured Cryptococcus
New.ReferenceOTU712	0.780012	1.74434	1.34976	1.29234	0.196241	NA	Ascomycota	Dothideomycetes	Capnodiales	Teratosphaeriaceae	Teratosphaeria	Teratosphaeria capensis
New.ReferenceOTU714	0.0971502	0.351235	2.96152	0.118599	0.905593	NA	Basidiomycota	Pucciniomycetes	Septobasidiales	Septobasidiaceae	Septobasidium	Septobasidium carestianum
New.ReferenceOTU1127	0.0581944	-0.632135	2.96374	-0.21329	0.831101	NA	Basidiomycota	Agaricomycetes	Agaricales	unidentified	unidentified	Agaricales sp
New.ReferenceOTU1123	0.257528	-0.343174	2.20438	-0.155678	0.876287	NA	Ascomycota	Leotiomycetes	Helotiales	Dermateaceae	unidentified	Dermateaceae sp
New.ReferenceOTU1120	0.139822	0.0512085	2.96331	0.0172809	0.986213	NA	Ascomycota	Dothideomycetes	Capnodiales	Mycosphaerellaceae	Xenosonderhenia	Xenosonderhenia syzygii
New.ReferenceOTU1692	0.593767	0.439236	1.13803	0.385962	0.699525	NA	Basidiomycota	Agaricomycetes	Agaricales	Strophariaceae	Psilocybe	Psilocybe sp
New.ReferenceOTU1341	0.261714	1.33087	1.89677	0.70165	0.482898	NA	Ascomycota	Sordariomycetes	Xylariales	Amphisphaeriaceae	Phlogicylindrium	Phlogicylindrium eucalyptorum
New.ReferenceOTU1347	0.123043	-0.440701	2.96333	-0.148718	0.881776	NA	Ascomycota	Dothideomycetes	Capnodiales	Teratosphaeriaceae	unidentified	uncultured Teratosphaeriaceae
New.ReferenceOTU397	0.18209	-0.0447009	2.29301	-0.0194944	0.984447	NA	Ascomycota	Eurotiomycetes	Chaetothyriales	unidentified	unidentified	Chaetothyriales sp
New.ReferenceOTU154	0	NA	NA	NA	NA	NA	Ascomycota	Dothideomycetes	Pleosporales	unidentified	unidentified	Pleosporales sp
New.ReferenceOTU155	0.0116616	-0.458222	2.96407	-0.154592	0.877143	NA	Ascomycota	Dothideomycetes	Capnodiales	Teratosphaeriaceae	unidentified	uncultured Teratosphaeriaceae
New.ReferenceOTU2485	0.548984	1.00496	1.49042	0.674276	0.500136	NA	Ascomycota	unidentified	unidentified	unidentified	unidentified	ascomycete sp IZ_962
New.ReferenceOTU2487	0	NA	NA	NA	NA	NA	Ascomycota	unidentified	unidentified	unidentified	unidentified	Ascomycota sp
New.ReferenceOTU2246	0.094553	0.416291	2.96105	0.140589	0.888195	NA	Ascomycota	Eurotiomycetes	Chaetothyriales	unidentified	unidentified	Chaetothyriales sp
New.ReferenceOTU2249	0.705001	-1.97867	1.41357	-1.39977	0.161583	NA	Ascomycota	Saccharomycetes	Saccharomycetales	Saccharomycodaceae	Hanseniaspora	Hanseniaspora uvarum
New.ReferenceOTU578	0.0727172	-0.13477	2.96399	-0.045469	0.963733	NA	Ascomycota	Eurotiomycetes	Chaetothyriales	Herpotrichiellaceae	Capronia	Capronia sp
New.ReferenceOTU976	0.207403	0.187565	2.87304	0.0652844	0.947948	NA	Ascomycota	Dothideomycetes	Pleosporales	Pleosporaceae	Alternaria	Alternaria solani
New.ReferenceOTU882	0.142785	-0.488061	2.96322	-0.164706	0.869175	NA	unidentified	unidentified	unidentified	unidentified	unidentified	Fungi sp
New.ReferenceOTU880	0.131764	-0.367532	2.7511	-0.133595	0.893723	NA	Basidiomycota	unidentified	unidentified	unidentified	unidentified	Basidiomycota sp
New.ReferenceOTU2062	0.28937	1.15236	1.65097	0.697988	0.485185	NA	Ascomycota	Dothideomycetes	Capnodiales	unidentified	unidentified	Capnodiales sp
New.ReferenceOTU2060	0.227155	0.649992	1.56201	0.416125	0.677318	NA	Ascomycota	Dothideomycetes	Capnodiales	unidentified	unidentified	Capnodiales sp
New.ReferenceOTU2067	0.409332	1.87541	1.58804	1.18096	0.237618	NA	Ascomycota	Dothideomycetes	Myriangiales	unidentified	unidentified	Myriangiales sp
New.ReferenceOTU2065	0.429248	-1.09835	1.84817	-0.59429	0.552318	NA	unidentified	unidentified	unidentified	unidentified	unidentified	uncultured fungus
New.ReferenceOTU2113	0.759267	1.55561	1.18199	1.3161	0.18814	NA	Ascomycota	Dothideomycetes	Capnodiales	Mycosphaerellaceae	Mycosphaerella	Mycosphaerella sp 5 ICMP 18846
New.ReferenceOTU2111	0.459012	-1.36564	1.34382	-1.01624	0.309513	NA	Ascomycota	Lecanoromycetes	Teloschistales	Teloschistaceae	Eilifdahlia	Eilifdahlia dahlii
New.ReferenceOTU2118	0	0	0	0	1	NA	Ascomycota	Eurotiomycetes	Mycocaliciales	Mycocaliciaceae	Chaenothecopsis	Chaenothecopsis resinophila
New.ReferenceOTU1977	0.196874	0.417056	2.50683	0.166368	0.867867	NA	Ascomycota	Eurotiomycetes	Chaetothyriales	unidentified	unidentified	Chaetothyriales sp
New.ReferenceOTU16	0.259143	-0.604014	1.88145	-0.321036	0.748183	NA	Ascomycota	unidentified	unidentified	unidentified	unidentified	Ascomycota sp
New.ReferenceOTU1801	0.1245	0.169759	2.96265	0.0572996	0.954307	NA	Ascomycota	unidentified	unidentified	unidentified	unidentified	Ascomycota sp
New.ReferenceOTU1204	0.537188	0.283521	1.02734	0.275975	0.782567	NA	Basidiomycota	unidentified	unidentified	unidentified	unidentified	Basidiomycota sp
New.ReferenceOTU767	0.258346	0.979925	2.11283	0.463798	0.642792	NA	Ascomycota	Leotiomycetes	Helotiales	Incertae sedis	Chlorencoelia	Chlorencoelia torta
New.ReferenceOTU1119	0.645735	0.0635065	1.15307	0.055076	0.956078	NA	Ascomycota	Dothideomycetes	Dothideales	Dothideaceae	Endoconidioma	Endoconidioma populi
New.ReferenceOTU763	0.651186	0.264573	1.21103	0.218469	0.827063	NA	Ascomycota	Eurotiomycetes	Chaetothyriales	Herpotrichiellaceae	Phaeomoniella	Phaeomoniella sp
New.ReferenceOTU1114	0.680746	-0.243611	1.37645	-0.176985	0.859521	NA	Ascomycota	Dothideomycetes	Pleosporales	Pleosporaceae	Drechslera	Drechslera poae
New.ReferenceOTU1599	0	NA	NA	NA	NA	NA	Ascomycota	Dothideomycetes	Capnodiales	Mycosphaerellaceae	unidentified	Mycosphaerellaceae sp
New.ReferenceOTU1595	0.493915	-1.05129	1.15916	-0.906937	0.36444	NA	Basidiomycota	Agaricomycetes	Agaricales	Psathyrellaceae	Coprinellus	Coprinellus micaceus
New.ReferenceOTU1591	0.130766	-1.53336	2.96137	-0.517789	0.604605	NA	Ascomycota	Leotiomycetes	Rhytismatales	Rhytismataceae	Lophodermium	Lophodermium sp 0705HL2
New.ReferenceOTU157	0.314879	0.710051	1.92416	0.369019	0.712114	NA	Ascomycota	unidentified	unidentified	unidentified	unidentified	Ascomycota sp
New.ReferenceOTU1570	0.368692	1.1817	1.82706	0.646775	0.517778	NA	Ascomycota	Dothideomycetes	Myriangiales	Elsinoaceae	unidentified	Elsinoaceae sp ZLY_2010b
New.ReferenceOTU1579	0.0473141	-0.13477	2.96399	-0.045469	0.963733	NA	Ascomycota	Saccharomycetes	Saccharomycetales	Incertae sedis	Debaryomyces	Debaryomyces nepalensis
New.ReferenceOTU1374	0	0	0	0	1	NA	Ascomycota	unidentified	unidentified	unidentified	unidentified	Ascomycota sp
New.ReferenceOTU1152	0.152618	0.792867	2.04173	0.388331	0.697771	NA	Basidiomycota	Agaricostilbomycetes	Agaricostilbales	Agaricostilbaceae	Bensingtonia	Bensingtonia miscanthi
New.ReferenceOTU369	0.342	1.67261	1.6362	1.02225	0.306661	NA	Ascomycota	Dothideomycetes	Capnodiales	Teratosphaeriaceae	unidentified	Teratosphaeriaceae sp
New.ReferenceOTU368	0.750635	1.82292	1.05555	1.72699	0.0841687	NA	Ascomycota	Sordariomycetes	Hypocreales	Incertae sedis	Acremonium	Acremonium alternatum
New.ReferenceOTU362	0	NA	NA	NA	NA	NA	Ascomycota	unidentified	unidentified	unidentified	unidentified	Ascomycota sp
New.ReferenceOTU169	0.260207	0.399701	2.16977	0.184213	0.853846	NA	Ascomycota	Dothideomycetes	Capnodiales	Mycosphaerellaceae	Phaeothecoidea	Phaeothecoidea melaleuca
New.ReferenceOTU164	0.294592	0.0953326	1.47842	0.0644828	0.948586	NA	Basidiomycota	Agaricostilbomycetes	Agaricostilbales	Agaricostilbaceae	Bensingtonia	Bensingtonia sp PYCC 5562
New.ReferenceOTU2476	0.22739	0.146129	1.76075	0.0829927	0.933857	NA	Ascomycota	Dothideomycetes	Capnodiales	unidentified	unidentified	Capnodiales sp
New.ReferenceOTU2477	0.33732	1.36675	1.4963	0.913419	0.361022	NA	Ascomycota	Dothideomycetes	Pleosporales	unidentified	unidentified	Pleosporales sp
New.ReferenceOTU2472	0.41762	0.981935	1.15203	0.852352	0.394019	NA	unidentified	unidentified	unidentified	unidentified	unidentified	fungal sp P1S14
New.ReferenceOTU183	0.460352	1.24896	1.25191	0.997645	0.318451	NA	Ascomycota	Dothideomycetes	Pleosporales	unidentified	unidentified	Pleosporales sp
New.ReferenceOTU187	0.311658	-1.99522	2.95904	-0.674278	0.500135	NA	Ascomycota	Saccharomycetes	Saccharomycetales	Saccharomycodaceae	Hanseniaspora	Hanseniaspora uvarum
New.ReferenceOTU2273	0.471452	1.08263	1.68792	0.641395	0.521266	NA	Ascomycota	Dothideomycetes	Capnodiales	unidentified	unidentified	Neodevriesiaceae sp CCFEE 5569
New.ReferenceOTU501	0.0429959	-0.792433	2.96374	-0.267376	0.78918	NA	Ascomycota	Dothideomycetes	Capnodiales	Davidiellaceae	Davidiella	Davidiella tassiana
New.ReferenceOTU2058	0.584962	1.74489	1.29149	1.35106	0.176676	NA	Ascomycota	Dothideomycetes	Capnodiales	Mycosphaerellaceae	Pseudocercospora	Pseudocercospora sphaerellae_eugeniae
New.ReferenceOTU4	0.477673	1.02813	1.81136	0.567601	0.570306	NA	Ascomycota	unidentified	unidentified	unidentified	unidentified	Ascomycota sp
New.ReferenceOTU2293	0.155471	0.288681	2.64605	0.109099	0.913124	NA	Ascomycota	Incertae sedis	Incertae sedis	Incertae sedis	Liberomyces	Liberomyces sp
New.ReferenceOTU2121	0.426399	0.326304	1.63974	0.198997	0.842265	NA	Basidiomycota	Tremellomycetes	Tremellales	unidentified	unidentified	uncultured Tremellales
New.ReferenceOTU2128	0.535327	0.580659	1.54021	0.377	0.706174	NA	Ascomycota	Dothideomycetes	Pleosporales	unidentified	unidentified	Pleosporales sp
New.ReferenceOTU1156	0.188915	0.829765	2.54738	0.325733	0.744626	NA	Ascomycota	Dothideomycetes	unidentified	unidentified	unidentified	Dothideomycetes sp
New.ReferenceOTU1969	0.401833	0.777434	1.1369	0.68382	0.494089	NA	Ascomycota	Dothideomycetes	Dothideales	Dothideaceae	Endoconidioma	Endoconidioma populi
New.ReferenceOTU1963	0.182199	0.510338	2.23736	0.228099	0.819569	NA	Basidiomycota	Ustilaginomycetes	Ustilaginales	Incertae sedis	Farysizyma	Farysizyma setubalensis
New.ReferenceOTU1815	0.229581	0.690384	2.48637	0.277667	0.781268	NA	Basidiomycota	Agaricostilbomycetes	Agaricostilbales	Agaricostilbaceae	Bensingtonia	Bensingtonia sp PYCC 5566
New.ReferenceOTU1812	0.294308	1.05653	1.51604	0.6969	0.485866	NA	Ascomycota	Dothideomycetes	Pleosporales	unidentified	unidentified	Pleosporales sp MUT 4397
New.ReferenceOTU1745	0.150067	-0.35967	2.32362	-0.154789	0.876988	NA	Basidiomycota	Tremellomycetes	Tremellales	Incertae sedis	Dioszegia	Dioszegia zsoltii var. yunnanensis
New.ReferenceOTU1743	0.129964	-0.379801	2.76066	-0.137576	0.890575	NA	Basidiomycota	Agaricomycetes	Corticiales	Corticiaceae	unidentified	uncultured Sistotrema
New.ReferenceOTU776	0	0	0	0	1	NA	unidentified	unidentified	unidentified	unidentified	unidentified	uncultured fungus
New.ReferenceOTU778	0.738388	2.12767	0.963227	2.20889	0.0271821	NA	Ascomycota	Sordariomycetes	Xylariales	unidentified	unidentified	Xylariales sp
New.ReferenceOTU1581	0.279263	0.523582	1.53339	0.341454	0.732762	NA	Ascomycota	Sordariomycetes	Hypocreales	unidentified	unidentified	Hypocreales sp
New.ReferenceOTU1580	0.647917	0.533554	2.02087	0.264022	0.791763	NA	Ascomycota	Dothideomycetes	Pleosporales	unidentified	unidentified	Pleosporales sp
New.ReferenceOTU1566	0.500242	-0.342124	1.65484	-0.206741	0.836212	NA	Basidiomycota	Agaricomycetes	Polyporales	unidentified	unidentified	Polyporales sp
New.ReferenceOTU1563	0.454654	0.914157	1.36141	0.671478	0.501916	NA	Ascomycota	Eurotiomycetes	Chaetothyriales	Herpotrichiellaceae	Phaeomoniella	Phaeomoniella sp
New.ReferenceOTU1562	0.0524032	-0.300136	2.96368	-0.101272	0.919335	NA	unidentified	unidentified	unidentified	unidentified	unidentified	uncultured fungus
New.ReferenceOTU1361	0.0646802	0.0152202	2.96345	0.00513597	0.995902	NA	Ascomycota	Eurotiomycetes	Chaetothyriales	Herpotrichiellaceae	Capronia	Capronia sp
New.ReferenceOTU1363	0.243617	0.316774	1.95126	0.162344	0.871035	NA	Ascomycota	unidentified	unidentified	unidentified	unidentified	Ascomycota sp
New.ReferenceOTU1365	0	NA	NA	NA	NA	NA	unidentified	unidentified	unidentified	unidentified	unidentified	uncultured fungus
New.ReferenceOTU1367	0.55189	0.171333	2.77873	0.0616588	0.950835	NA	Ascomycota	Sordariomycetes	Incertae sedis	Plectosphaerellaceae	Verticillium	Verticillium dahliae
New.ReferenceOTU178	0.174545	0.827619	2.95782	0.279807	0.779625	NA	Ascomycota	Dothideomycetes	Venturiales	Venturiaceae	Venturia	Venturia pyrina
New.ReferenceOTU179	0.178746	-0.579554	2.24914	-0.257678	0.796655	NA	Ascomycota	Dothideomycetes	Dothideales	Dothideaceae	Dothidea	Dothidea sp CanS_64
New.ReferenceOTU172	0.233036	0.810725	2.83595	0.285875	0.774974	NA	Ascomycota	Dothideomycetes	Pleosporales	unidentified	unidentified	Pleosporales sp
New.ReferenceOTU2462	0.447234	0.819182	1.67018	0.490475	0.623798	NA	Ascomycota	Dothideomycetes	Pleosporales	unidentified	unidentified	Pleosporales sp
New.ReferenceOTU2460	0.574281	1.02501	1.19074	0.860816	0.389339	NA	Ascomycota	Sordariomycetes	Xylariales	Diatrypaceae	Diatrype	Diatrype sp FPT_5
New.ReferenceOTU192	0.316638	0.152939	2.03788	0.0750483	0.940176	NA	Ascomycota	Dothideomycetes	Botryosphaeriales	unidentified	unidentified	uncultured Botryosphaeriales
New.ReferenceOTU195	0.669191	1.37655	1.85081	0.743754	0.457025	NA	Ascomycota	unidentified	unidentified	unidentified	unidentified	uncultured Ascomycota
New.ReferenceOTU513	0.394027	1.48905	1.62313	0.917395	0.358936	NA	Basidiomycota	Tremellomycetes	Tremellales	unidentified	unidentified	Tremellales sp PNB099A
New.ReferenceOTU990	0.316187	-0.533206	1.85322	-0.287718	0.773562	NA	Ascomycota	Eurotiomycetes	Chaetothyriales	Herpotrichiellaceae	Exophiala	Exophiala sp
New.ReferenceOTU993	0.380636	-1.45422	2.58075	-0.563488	0.573103	NA	Ascomycota	Sordariomycetes	Xylariales	unidentified	unidentified	Xylariales sp
New.ReferenceOTU997	0.195561	1.00258	2.53448	0.395578	0.692416	NA	Basidiomycota	Agaricomycetes	Agaricales	unidentified	unidentified	Agaricales sp
New.ReferenceOTU200	0.0480231	-0.792433	2.96374	-0.267376	0.78918	NA	Basidiomycota	Agaricomycetes	Agaricales	unidentified	unidentified	Agaricales sp
New.ReferenceOTU201	0.764691	1.25846	1.8115	0.694705	0.48724	NA	Ascomycota	Dothideomycetes	Incertae sedis	Incertae sedis	Scleroconidioma	Scleroconidioma sphagnicola
New.ReferenceOTU2044	0.0108403	-0.458222	2.96407	-0.154592	0.877143	NA	Ascomycota	Eurotiomycetes	Pyrenulales	Massariaceae	Massaria	Massaria pyri
New.ReferenceOTU2046	0.406333	0.763583	1.28241	0.595427	0.551558	NA	Ascomycota	Eurotiomycetes	Chaetothyriales	Herpotrichiellaceae	unidentified	Herpotrichiellaceae sp
New.ReferenceOTU2285	0.629802	0.634248	0.78524	0.807712	0.419256	NA	Ascomycota	Dothideomycetes	Dothideales	Dothideaceae	Endoconidioma	Endoconidioma populi
New.ReferenceOTU907	0.297984	0.598276	1.83874	0.325373	0.744899	NA	Basidiomycota	Tremellomycetes	Tremellales	Incertae sedis	Dioszegia	Dioszegia zsoltii var. yunnanensis
New.ReferenceOTU1957	0.334277	0.974312	1.66634	0.584701	0.558749	NA	unidentified	unidentified	unidentified	unidentified	unidentified	uncultured fungus
New.ReferenceOTU1952	0.431909	1.96927	1.9836	0.992774	0.32082	NA	Ascomycota	Eurotiomycetes	Chaetothyriales	Herpotrichiellaceae	Phaeomoniella	Phaeomoniella sp
New.ReferenceOTU39	0.604518	2.02134	1.12152	1.80231	0.0714959	NA	Ascomycota	Dothideomycetes	Pleosporales	unidentified	unidentified	Pleosporales sp
New.ReferenceOTU1820	0.275018	0.335322	1.83068	0.183168	0.854666	NA	unidentified	unidentified	unidentified	unidentified	unidentified	uncultured fungus
New.ReferenceOTU743	0.383563	-0.679874	1.87417	-0.36276	0.716784	NA	Ascomycota	Dothideomycetes	unidentified	unidentified	unidentified	Dothideomycetes sp
New.ReferenceOTU742	0.763319	1.60534	1.29414	1.24047	0.214801	NA	unidentified	unidentified	unidentified	unidentified	unidentified	uncultured fungus
New.ReferenceOTU747	0.337467	0.0890692	1.67154	0.0532858	0.957504	NA	Ascomycota	Dothideomycetes	Pleosporales	Phaeosphaeriaceae	Sclerostagonospora	Sclerostagonospora sp CBS 118224
New.ReferenceOTU1551	0.47034	1.84993	1.76611	1.04746	0.294887	NA	Basidiomycota	Tremellomycetes	Tremellales	Incertae sedis	Cryptococcus	Cryptococcus sp CBS 8358
New.ReferenceOTU1008	0.667359	1.24366	0.891101	1.39565	0.162821	NA	Ascomycota	unidentified	unidentified	unidentified	unidentified	Ascomycota sp
New.ReferenceOTU1555	0.146824	0.41078	1.82729	0.224802	0.822133	NA	unidentified	unidentified	unidentified	unidentified	unidentified	fungal sp ARIZ AZ1110
New.ReferenceOTU1003	0.160487	0.0859451	2.35799	0.0364485	0.970925	NA	unidentified	unidentified	unidentified	unidentified	unidentified	uncultured fungus
New.ReferenceOTU1393	0.63132	1.02702	1.50716	0.681429	0.4956	NA	Ascomycota	Dothideomycetes	Capnodiales	Mycosphaerellaceae	Septoria	Septoria cretae
New.ReferenceOTU349	0.301362	0.660314	1.88681	0.349963	0.726367	NA	Basidiomycota	Tremellomycetes	Tremellales	Incertae sedis	Dioszegia	Dioszegia zsoltii var. yunnanensis
New.ReferenceOTU1486	0.439602	-0.0387039	1.66859	-0.0231956	0.981494	NA	Ascomycota	Eurotiomycetes	Eurotiales	Trichocomaceae	Aspergillus	Aspergillus sydowii
New.ReferenceOTU2457	0.396753	-1.49798	1.52988	-0.979149	0.327506	NA	Ascomycota	Dothideomycetes	Capnodiales	Teratosphaeriaceae	Catenulostroma	Catenulostroma eucalyptorum
New.ReferenceOTU2454	0.60781	1.25469	1.15327	1.08794	0.276621	NA	Basidiomycota	Agaricomycetes	Agaricales	unidentified	unidentified	Agaricales sp
New.ReferenceOTU2455	0.131767	0.059991	2.7237	0.0220256	0.982428	NA	Ascomycota	Dothideomycetes	Capnodiales	Mycosphaerellaceae	Passalora	Passalora californica
New.ReferenceOTU528	0.0116616	-0.458222	2.96407	-0.154592	0.877143	NA	Ascomycota	Dothideomycetes	Capnodiales	Davidiellaceae	Cladosporium	Cladosporium fusiforme
New.ReferenceOTU836	0.543244	0.825713	1.10323	0.74845	0.454188	NA	Basidiomycota	Tremellomycetes	Tremellales	Incertae sedis	Cryptococcus	Cryptococcus dimennae
New.ReferenceOTU2140	0.233612	0.607402	2.16856	0.280095	0.779405	NA	Ascomycota	Lecanoromycetes	Lecanorales	Parmeliaceae	Parmotrema	Parmotrema fistulatum
New.ReferenceOTU1942	0.158965	0.354857	2.29104	0.154889	0.876909	NA	Ascomycota	Incertae sedis	Incertae sedis	Incertae sedis	Xenobotrytis	Xenobotrytis acaducospora
New.ReferenceOTU1947	0.761711	0.0381353	1.58165	0.0241111	0.980764	NA	Ascomycota	Dothideomycetes	Capnodiales	Mycosphaerellaceae	Mycosphaerella	Mycosphaerella sp L357
New.ReferenceOTU1838	0.0847502	-0.308683	2.96366	-0.104156	0.917046	NA	Ascomycota	Sordariomycetes	Diaporthales	Diaporthaceae	Phomopsis	Phomopsis sp NY7453a
New.ReferenceOTU1836	0.447532	0.858032	1.3615	0.630211	0.528557	NA	Basidiomycota	Agaricomycetes	Russulales	unidentified	unidentified	Russulales sp
New.ReferenceOTU755	0.641706	0.385917	1.65054	0.233813	0.81513	NA	Basidiomycota	Agaricomycetes	Russulales	Peniophoraceae	unidentified	Peniophoraceae sp
New.ReferenceOTU1161	0.121745	-0.651216	2.9633	-0.21976	0.826058	NA	Ascomycota	Dothideomycetes	Capnodiales	Davidiellaceae	Cladosporium	Cladosporium pseudiridis
New.ReferenceOTU1166	0.569217	-0.271886	1.19007	-0.228463	0.819287	NA	Ascomycota	Sordariomycetes	Coniochaetales	Coniochaetaceae	unidentified	Coniochaetaceae sp
New.ReferenceOTU1768	0.229915	0.0284111	1.5427	0.0184164	0.985307	NA	Ascomycota	Dothideomycetes	Dothideales	Dothideaceae	Endoconidioma	Endoconidioma populi
New.ReferenceOTU1018	0.210635	0.0519078	1.75277	0.0296147	0.976374	NA	Ascomycota	Dothideomycetes	Capnodiales	unidentified	unidentified	Neodevriesiaceae sp CCFEE 5569
New.ReferenceOTU1544	0.619517	0.819442	0.973535	0.841718	0.399946	NA	Basidiomycota	Ustilaginomycetes	Ustilaginales	Ustilaginaceae	unidentified	Ustilaginaceae sp
New.ReferenceOTU1014	0.209538	0.140829	1.77415	0.0793781	0.936732	NA	Ascomycota	Dothideomycetes	Dothideales	Dothideaceae	Endoconidioma	Endoconidioma populi
New.ReferenceOTU351	0	0	0	0	1	NA	Basidiomycota	Tremellomycetes	unidentified	unidentified	unidentified	Tremellomycetes sp
New.ReferenceOTU357	0	0	0	0	1	NA	Ascomycota	unidentified	unidentified	unidentified	unidentified	Ascomycota sp
New.ReferenceOTU355	0.197152	-0.472111	1.94859	-0.242283	0.808561	NA	Ascomycota	Lecanoromycetes	Rhizocarpales	Catillariaceae	Catillaria	Catillaria nigroclavata
New.ReferenceOTU359	0.198488	0.0877307	2.89194	0.0303363	0.975799	NA	Ascomycota	Dothideomycetes	unidentified	unidentified	unidentified	Dothideomycetes sp
New.ReferenceOTU2446	0.740547	-0.0595778	1.22079	-0.0488026	0.961077	NA	Basidiomycota	Agaricomycetes	Agaricales	Strophariaceae	Hypholoma	Hypholoma australe
New.ReferenceOTU533	0.0530381	-0.632135	2.96374	-0.21329	0.831101	NA	Ascomycota	Dothideomycetes	Myriangiales	Elsinoaceae	unidentified	Elsinoaceae sp ZLY_2010b
New.ReferenceOTU1556	0	NA	NA	NA	NA	NA	Basidiomycota	Microbotryomycetes	Sporidiobolales	Incertae sedis	Rhodotorula	Rhodotorula acheniorum
New.ReferenceOTU825	0.753398	1.09017	0.928741	1.17381	0.24047	NA	Chytridiomycota	unidentified	unidentified	unidentified	unidentified	uncultured Chytridiomycota
New.ReferenceOTU693	0.291397	0.241292	2.09588	0.115127	0.908344	NA	Basidiomycota	Tremellomycetes	Tremellales	unidentified	unidentified	Tremellales sp
New.ReferenceOTU54	0.438952	1.972	1.60163	1.23124	0.218232	NA	Ascomycota	Leotiomycetes	Helotiales	Vibrisseaceae	Phialocephala	Phialocephala fluminis
New.ReferenceOTU53	0.0712067	-0.971812	2.9633	-0.327949	0.74295	NA	Ascomycota	Eurotiomycetes	Chaetothyriales	unidentified	unidentified	Chaetothyriales sp
New.ReferenceOTU1712	0.0929039	-1.01839	2.96263	-0.343745	0.731038	NA	Basidiomycota	Exobasidiomycetes	Exobasidiales	Exobasidiaceae	Exobasidium	Exobasidium yoshinagae
New.ReferenceOTU1534	0.0837873	0.00539627	2.96349	0.00182092	0.998547	NA	Ascomycota	Eurotiomycetes	Pyrenulales	Massariaceae	Massaria	Massaria pyri
New.ReferenceOTU1025	0.124561	0.0385501	2.96204	0.0130147	0.989616	NA	Basidiomycota	Tremellomycetes	Tremellales	Incertae sedis	Kockovaella	Kockovaella machilophila
New.ReferenceOTU320	0.0685008	0.220421	2.96232	0.0744083	0.940686	NA	Ascomycota	Leotiomycetes	Helotiales	Incertae sedis	Chlorencoelia	Chlorencoelia torta
New.ReferenceOTU2437	0.0326589	-0.971812	2.9633	-0.327949	0.74295	NA	Ascomycota	unidentified	unidentified	unidentified	unidentified	uncultured Ascomycota
New.ReferenceOTU785	0.110512	-0.651216	2.9633	-0.21976	0.826058	NA	Basidiomycota	Cystobasidiomycetes	Erythrobasidiales	unidentified	unidentified	uncultured Erythrobasidiales
New.ReferenceOTU2383	0	NA	NA	NA	NA	NA	unidentified	unidentified	unidentified	unidentified	unidentified	uncultured fungus
New.ReferenceOTU250	0.0390028	-0.632135	2.96374	-0.21329	0.831101	NA	Ascomycota	Eurotiomycetes	Chaetothyriales	unidentified	unidentified	Chaetothyriales sp
New.ReferenceOTU814	0.118619	-1.44148	2.96175	-0.486699	0.626472	NA	Ascomycota	Saccharomycetes	Saccharomycetales	Incertae sedis	Candida	Candida fennica
New.ReferenceOTU2094	0.42359	0.96833	1.10777	0.874123	0.382051	NA	Ascomycota	Dothideomycetes	Pleosporales	Phaeosphaeriaceae	Sclerostagonospora	Sclerostagonospora sp CBS 118224
New.ReferenceOTU2362	0.35552	1.22666	1.47684	0.8306	0.4062	NA	Ascomycota	Dothideomycetes	Myriangiales	Elsinoaceae	unidentified	Elsinoaceae sp KNUC262
New.ReferenceOTU1299	0.0448088	-0.632135	2.96374	-0.21329	0.831101	NA	Ascomycota	Dothideomycetes	Capnodiales	Mycosphaerellaceae	Pseudocercospora	Pseudocercospora sphaerulinae
New.ReferenceOTU1142	0.419387	0.817889	1.19026	0.687149	0.491989	NA	Basidiomycota	Microbotryomycetes	Sporidiobolales	Incertae sedis	Sporobolomyces	Sporobolomyces elongatus
New.ReferenceOTU1700	0.0296954	-0.458222	2.96407	-0.154592	0.877143	NA	Basidiomycota	Agaricomycetes	Atheliales	Atheliaceae	unidentified	Atheliaceae sp
New.ReferenceOTU1706	0.600276	1.48629	1.01335	1.46671	0.142455	NA	Ascomycota	Dothideomycetes	Dothideales	Dothideaceae	Endoconidioma	Endoconidioma populi
New.ReferenceOTU1705	0.479738	0.284241	1.82832	0.155466	0.876454	NA	Ascomycota	Dothideomycetes	Capnodiales	Capnodiaceae	Capnodium	Capnodium sp
New.ReferenceOTU1503	0.280289	0.861087	1.66159	0.51823	0.604298	NA	Ascomycota	Dothideomycetes	unidentified	unidentified	unidentified	Dothideomycetes sp
New.ReferenceOTU1037	0.612095	1.24555	1.26448	0.985026	0.324611	NA	Ascomycota	Dothideomycetes	Capnodiales	unidentified	unidentified	Capnodiales sp
New.ReferenceOTU1036	0.347435	1.65795	2.3353	0.709953	0.477733	NA	Basidiomycota	Tremellomycetes	unidentified	unidentified	unidentified	uncultured Cryptococcus
New.ReferenceOTU2427	0.295022	0.89354	2.10837	0.423805	0.671708	NA	Ascomycota	Dothideomycetes	Myriangiales	Incertae sedis	Endosporium	Endosporium sp
New.ReferenceOTU793	0.221792	0.133437	2.44743	0.0545213	0.95652	NA	Ascomycota	Lecanoromycetes	Agyriales	Agyriaceae	Trapeliopsis	Trapeliopsis californica
New.ReferenceOTU1593	0.184498	0.600081	2.53769	0.236468	0.81307	NA	Ascomycota	unidentified	unidentified	unidentified	unidentified	Ascomycota sp
New.ReferenceOTU2392	0.218019	0.403749	2.47941	0.162841	0.870644	NA	Ascomycota	Dothideomycetes	Pleosporales	Montagnulaceae	Paraconiothyrium	Paraconiothyrium sp NO237
New.ReferenceOTU2396	0.16842	0.489838	2.27423	0.215386	0.829466	NA	Ascomycota	Incertae sedis	Incertae sedis	Pseudeurotiaceae	unidentified	Pseudeurotiaceae sp
New.ReferenceOTU247	0.354073	1.67833	2.65258	0.632716	0.526919	NA	Ascomycota	Taphrinomycetes	Taphrinales	Taphrinaceae	unidentified	Taphrinaceae sp
New.ReferenceOTU808	0	NA	NA	NA	NA	NA	Basidiomycota	Exobasidiomycetes	Exobasidiales	Exobasidiaceae	Exobasidium	Exobasidium formosanum
New.ReferenceOTU806	0.295594	0.426332	1.98263	0.215034	0.829741	NA	Ascomycota	Dothideomycetes	Pleosporales	Incertae sedis	Phoma	Phoma paspali
New.ReferenceOTU2082	0.203289	-0.411038	2.19403	-0.187344	0.851391	NA	Ascomycota	Eurotiomycetes	Eurotiales	Trichocomaceae	Penicillium	Penicillium sp
New.ReferenceOTU2089	0	NA	NA	NA	NA	NA	Basidiomycota	Tremellomycetes	Tremellales	Incertae sedis	Trimorphomyces	Trimorphomyces papilionaceus
New.ReferenceOTU1571	0.148039	0.414925	2.96106	0.140127	0.88856	NA	Ascomycota	Dothideomycetes	Myriangiales	unidentified	unidentified	Myriangiales sp
New.ReferenceOTU2379	0.602443	1.41497	1.15534	1.22472	0.22068	NA	Ascomycota	unidentified	unidentified	unidentified	unidentified	uncultured Ascomycota
New.ReferenceOTU2255	0	0	0	0	1	NA	Basidiomycota	Agaricomycetes	Agaricales	Inocybaceae	Inocybe	Inocybe sp
New.ReferenceOTU1994	0.500542	0.523972	1.37439	0.38124	0.703025	NA	Ascomycota	Dothideomycetes	Capnodiales	Teratosphaeriaceae	unidentified	Teratosphaeriaceae sp
New.ReferenceOTU1869	0.111316	-1.34448	2.96211	-0.453894	0.649905	NA	Ascomycota	unidentified	unidentified	unidentified	unidentified	uncultured Ascomycota
New.ReferenceOTU1026	0.591874	-0.564271	1.55462	-0.362965	0.716631	NA	Ascomycota	Sordariomycetes	Sordariales	Lasiosphaeriaceae	Cercophora	Cercophora sp
New.ReferenceOTU1600	0.699609	0.752234	1.95303	0.385163	0.700117	NA	Ascomycota	Dothideomycetes	Dothideales	Dothioraceae	Sydowia	Sydowia sp
New.ReferenceOTU1606	0.221137	-1.29788	1.88957	-0.686864	0.492169	NA	Ascomycota	Dothideomycetes	Dothideales	Dothideaceae	Dothidea	Dothidea sp CanS_64
New.ReferenceOTU1738	0.564409	1.42651	1.17446	1.2146	0.224517	NA	Ascomycota	Dothideomycetes	Pleosporales	unidentified	unidentified	Pleosporales sp
New.ReferenceOTU1737	0.520004	0.5024	1.04988	0.478531	0.632272	NA	Ascomycota	Dothideomycetes	unidentified	unidentified	unidentified	Dothideomycetes sp
New.ReferenceOTU498	0.0694885	0.0367009	2.96336	0.0123849	0.990119	NA	Ascomycota	Dothideomycetes	Capnodiales	Teratosphaeriaceae	Devriesia	Devriesia hilliana
New.ReferenceOTU1040	0.436607	1.08053	1.47969	0.730237	0.465245	NA	Ascomycota	Dothideomycetes	Pleosporales	Phaeosphaeriaceae	Stagonospora	Stagonospora sp TA26_24
New.ReferenceOTU1047	0.0473141	-0.13477	2.96399	-0.045469	0.963733	NA	unidentified	unidentified	unidentified	unidentified	unidentified	uncultured fungus
New.ReferenceOTU1048	0.164494	-0.838904	2.9627	-0.283155	0.777058	NA	Ascomycota	Eurotiomycetes	Eurotiales	Trichocomaceae	Penicillium	Penicillium christenseniae
New.ReferenceOTU1519	0.582333	1.62347	0.91206	1.78	0.0750759	NA	Ascomycota	Dothideomycetes	Pleosporales	Cucurbitariaceae	Curreya	Curreya sp
New.ReferenceOTU659	0	0	0	0	1	NA	unidentified	unidentified	unidentified	unidentified	unidentified	fungal sp TRN254
New.ReferenceOTU658	0.171722	0.82285	2.60952	0.315326	0.752514	NA	Ascomycota	Sordariomycetes	Xylariales	Diatrypaceae	unidentified	Diatrypaceae sp
New.ReferenceOTU651	0.044354	-0.144518	2.964	-0.0487576	0.961112	NA	Ascomycota	Dothideomycetes	Capnodiales	Davidiellaceae	Cladosporium	Cladosporium exasperatum
New.ReferenceOTU302	0.337768	-0.591281	1.50374	-0.393206	0.694167	NA	Ascomycota	Lecanoromycetes	Lecanorales	Incertae sedis	Scoliciosporum	Scoliciosporum umbrinum
New.ReferenceOTU2416	0.0503991	-0.13477	2.96399	-0.045469	0.963733	NA	Ascomycota	Dothideomycetes	Myriangiales	unidentified	unidentified	Myriangiales sp
New.ReferenceOTU1197	0.0799454	0.0512081	2.96331	0.0172807	0.986213	NA	Ascomycota	Eurotiomycetes	Chaetothyriales	Herpotrichiellaceae	Rhinocladiella	Rhinocladiella sp
New.ReferenceOTU476	0.0534146	-0.632135	2.96374	-0.21329	0.831101	NA	Ascomycota	unidentified	unidentified	unidentified	unidentified	uncultured Pezizomycotina
New.ReferenceOTU474	0.0426556	-1.07194	2.96301	-0.361773	0.717521	NA	Ascomycota	Leotiomycetes	Helotiales	Incertae sedis	Trimmatostroma	Trimmatostroma salinum
New.ReferenceOTU272	0.0163294	-0.792433	2.96374	-0.267376	0.78918	NA	Ascomycota	Dothideomycetes	Incertae sedis	Incertae sedis	Bactrodesmium	Bactrodesmium gabretae
New.ReferenceOTU277	0.115478	0.525354	2.44933	0.214489	0.830166	NA	unidentified	unidentified	unidentified	unidentified	unidentified	fungal sp ARIZ AZ1110
New.ReferenceOTU879	0.577205	1.48725	1.19326	1.24638	0.212626	NA	Ascomycota	Sordariomycetes	Xylariales	Amphisphaeriaceae	Pestalotiopsis	Pestalotiopsis sp E_000535668
New.ReferenceOTU878	0.51535	0.665596	1.19343	0.557717	0.577037	NA	Basidiomycota	Ustilaginomycetes	Ustilaginales	Ustilaginaceae	Ustilago	Ustilago striiformis
New.ReferenceOTU876	0.652691	1.68728	1.81135	0.931502	0.351594	NA	Basidiomycota	Agaricomycetes	Geastrales	Geastraceae	Geastrum	Geastrum lageniforme
New.ReferenceOTU2343	0.596751	0.277709	1.30716	0.212451	0.831755	NA	Ascomycota	unidentified	unidentified	unidentified	unidentified	Ascomycota sp
New.ReferenceOTU2345	0.435862	1.77114	1.33206	1.32963	0.183641	NA	Ascomycota	Arthoniomycetes	Arthoniales	Chrysothricaceae	Chrysothrix	Chrysothrix sp KWS 23
New.ReferenceOTU1989	0.620813	0.739637	1.11883	0.661082	0.50856	NA	Ascomycota	Dothideomycetes	Capnodiales	unidentified	unidentified	Capnodiales sp
New.ReferenceOTU69	0.750007	0.404054	1.23278	0.327759	0.743094	NA	Basidiomycota	Agaricomycetes	Russulales	Stereaceae	Gloeocystidiellum	Gloeocystidiellum sp
New.ReferenceOTU62	0.729407	1.35245	1.35302	0.999579	0.317514	NA	Ascomycota	Dothideomycetes	Incertae sedis	Micropeltidaceae	Stomiopeltis	Stomiopeltis sp T49A1c
New.ReferenceOTU1725	0.0228336	-0.297924	2.96407	-0.100512	0.919938	NA	Ascomycota	Lecanoromycetes	Pertusariales	Pertusariaceae	Pertusaria	Pertusaria aff corallina BRY C56061
New.ReferenceOTU1724	0.55103	0.680276	1.18471	0.574211	0.565825	NA	Ascomycota	Dothideomycetes	Hysteriales	Hysteriaceae	Gloniopsis	Gloniopsis sp MFLUCC 12_0010
New.ReferenceOTU1727	0.0308946	-0.458222	2.96407	-0.154592	0.877143	NA	Ascomycota	unidentified	unidentified	unidentified	unidentified	uncultured Ascomycota
New.ReferenceOTU1726	0.708788	-0.911397	0.933443	-0.976383	0.328875	NA	Ascomycota	Dothideomycetes	Pleosporales	Pleosporaceae	unidentified	Pleosporaceae sp
New.ReferenceOTU81	0.709723	0.348024	1.83021	0.190155	0.849188	NA	Ascomycota	Lecanoromycetes	Teloschistales	Physciaceae	Physcia	Physcia tribacia
New.ReferenceOTU84	0.406213	1.29411	1.78882	0.723443	0.469407	NA	Ascomycota	Dothideomycetes	Pleosporales	Phaeosphaeriaceae	Sclerostagonospora	Sclerostagonospora sp CBS 118224
New.ReferenceOTU1295	0	NA	NA	NA	NA	NA	Basidiomycota	Pucciniomycetes	Pachnocybales	Pachnocybaceae	Pachnocybe	Pachnocybe ferruginea
New.ReferenceOTU1294	0.224366	1.16373	2.48504	0.468294	0.639575	NA	Basidiomycota	Tremellomycetes	Tremellales	unidentified	unidentified	Tremellales sp
New.ReferenceOTU484	0.275187	0.470255	1.9321	0.24339	0.807703	NA	unidentified	unidentified	unidentified	unidentified	unidentified	fungal sp agrD488
New.ReferenceOTU1051	0.155429	0.385447	2.68478	0.143567	0.885842	NA	Ascomycota	Dothideomycetes	Capnodiales	unidentified	unidentified	Capnodiales sp
New.ReferenceOTU1057	0.368502	-0.199695	1.38141	-0.144559	0.885059	NA	Ascomycota	Incertae sedis	Incertae sedis	Incertae sedis	Radulidium	Radulidium sp
New.ReferenceOTU644	0.321652	-0.0984349	2.0304	-0.0484806	0.961333	NA	Ascomycota	Dothideomycetes	Capnodiales	Mycosphaerellaceae	Xenosonderhenia	Xenosonderhenia syzygii
New.ReferenceOTU310	0.736831	0.942644	1.298	0.726227	0.4677	NA	Ascomycota	Dothideomycetes	Capnodiales	Teratosphaeriaceae	unidentified	Teratosphaeriaceae sp
New.ReferenceOTU1479	0.610167	1.03744	1.33532	0.776921	0.437205	NA	unidentified	unidentified	unidentified	unidentified	unidentified	fungal sp P1S14
New.ReferenceOTU1477	0.679563	1.05131	1.38236	0.760519	0.446944	NA	Ascomycota	Lecanoromycetes	Lecanorales	Incertae sedis	Scoliciosporum	Scoliciosporum chlorococcum
New.ReferenceOTU1476	0.531932	-0.920592	1.18703	-0.775546	0.438017	NA	Ascomycota	Eurotiomycetes	Chaetothyriales	Herpotrichiellaceae	Exophiala	Exophiala eucalyptorum
New.ReferenceOTU1182	0.605597	0.846017	1.18637	0.713113	0.475776	NA	Ascomycota	Lecanoromycetes	Teloschistales	Physciaceae	Physcia	Physcia tribacia
New.ReferenceOTU462	0.788045	2.30568	2.1564	1.06923	0.284966	NA	unidentified	unidentified	unidentified	unidentified	unidentified	Fungi sp
New.ReferenceOTU464	0.72932	0.796021	1.52179	0.52308	0.600918	NA	Ascomycota	Sordariomycetes	Sordariales	Lasiosphaeriaceae	Podospora	Podospora decipiens
New.ReferenceOTU868	0.691165	1.16202	1.3065	0.889413	0.373781	NA	Ascomycota	Dothideomycetes	Capnodiales	Mycosphaerellaceae	Ramularia	Ramularia stellenboschensis
New.ReferenceOTU959	0.263182	1.32823	2.95314	0.449768	0.652877	NA	Ascomycota	Lecanoromycetes	Teloschistales	Physciaceae	unidentified	Physciaceae sp KWS 26
New.CleanUp.ReferenceOTU1	0.482058	0.52609	0.96442	0.545499	0.585411	NA	Ascomycota	Dothideomycetes	Dothideales	Dothioraceae	Aureobasidium	Aureobasidium pullulans
New.CleanUp.ReferenceOTU203	0.0344421	-0.297924	2.96407	-0.100512	0.919938	NA	Ascomycota	Dothideomycetes	Pleosporales	unidentified	unidentified	Pleosporales sp
New.CleanUp.ReferenceOTU528	0.439807	1.12487	1.38633	0.811402	0.417135	NA	Ascomycota	Dothideomycetes	Pleosporales	Phaeosphaeriaceae	unidentified	Phaeosphaeriaceae sp
New.CleanUp.ReferenceOTU1099	0.752902	-1.78135	0.819849	-2.17278	0.029797	NA	Ascomycota	Dothideomycetes	Capnodiales	Davidiellaceae	Cladosporium	Cladosporium exasperatum
New.CleanUp.ReferenceOTU1178	0.508187	1.14674	1.38318	0.829057	0.407072	NA	Ascomycota	Dothideomycetes	Pleosporales	unidentified	unidentified	Pleosporales sp
New.CleanUp.ReferenceOTU1476	0.593066	0.324026	1.53656	0.210878	0.832983	NA	Ascomycota	Dothideomycetes	Pleosporales	Pleosporaceae	Alternaria	Alternaria solani
New.CleanUp.ReferenceOTU1953	0.273883	-0.44493	2.15655	-0.206315	0.836544	NA	Ascomycota	Eurotiomycetes	Chaetothyriales	unidentified	unidentified	Chaetothyriales sp
New.CleanUp.ReferenceOTU3215	0.551361	-0.0247667	1.43656	-0.0172403	0.986245	NA	Ascomycota	Sordariomycetes	Sordariales	Chaetomiaceae	Chaetomium	Chaetomium sp
New.CleanUp.ReferenceOTU4076	0.144069	-1.1595	2.9627	-0.391366	0.695527	NA	Ascomycota	Sordariomycetes	Diaporthales	Diaporthaceae	Phomopsis	Phomopsis sp NY7453a
New.CleanUp.ReferenceOTU4823	0.261339	1.25645	2.13621	0.588168	0.55642	NA	unidentified	unidentified	unidentified	unidentified	unidentified	uncultured fungus
New.CleanUp.ReferenceOTU5853	0.540076	-1.22833	1.28149	-0.958517	0.337802	NA	Ascomycota	Dothideomycetes	unidentified	unidentified	unidentified	Dothideomycetes sp
