# Supplementary material for: Effects of agricultural management on phyllosphere fungal diversity in vineyards and the association with adjacent native forests
Source: PeerJ. 2018 Oct 29;6:e5715. doi: 10.7717/peerj.5715 (PMC6211267; doi:10.7717/peerj.5715)
Supplement: Table S5 — This table indicates the taxonomic assignment of each OTU, the F statistic and its P-values, the P-value corrected for multiple comparisons (False Discovery Rare; FDR), and the mean relative abundance of each species in the vineyards and forest. Green rows indicate species that were significantly more abundant in native forests and purple rows indicate species that were significantly more abundant in the vineyards. [file peerj-06-5715-s006.xlsx]

## Sheet: SuppMat-ITS_DESeq_Ecosystem_Lea
OTU ID	Normalized mean	Log2 Fold Change	LFC SE	Wald statistic	P-value	FDR P-value	Phylum	Class	Order	Family	Genus	Species
New.ReferenceOTU1608	2052.3	7.86542	0.649789	12.1046	9.98985e-34	< 0.0001	Ascomycota	Leotiomycetes	Erysiphales	Erysiphaceae	Erysiphe	Erysiphe necator
New.ReferenceOTU1462	207.013	-5.29952	0.478252	-11.081	1.55093e-28	< 0.0001	Ascomycota	Eurotiomycetes	Chaetothyriales	unidentified	unidentified	Chaetothyriales sp
New.ReferenceOTU1893	2116.95	1.85398	0.181365	10.2224	1.57467e-24	< 0.0001	Ascomycota	Dothideomycetes	Pleosporales	Incertae sedis	Didymella	Didymella sp
New.ReferenceOTU1149	454.199	2.19525	0.227586	9.6458	5.12084e-22	< 0.0001	Ascomycota	Dothideomycetes	Pleosporales	unidentified	unidentified	Pleosporales sp
New.ReferenceOTU1803	195.448	-5.11558	0.551152	-9.28162	1.66926e-20	< 0.0001	Ascomycota	Dothideomycetes	Pleosporales	Montagnulaceae	Paraconiothyrium	Paraconiothyrium hawaiiense
New.ReferenceOTU34	326.118	-2.97983	0.321266	-9.27527	1.77169e-20	< 0.0001	Ascomycota	Dothideomycetes	Capnodiales	Teratosphaeriaceae	Devriesia	Devriesia fraseriae
New.ReferenceOTU438	650.908	1.91955	0.211263	9.08606	1.02697e-19	< 0.0001	Ascomycota	Dothideomycetes	Pleosporales	Pleosporaceae	Pleospora	Pleospora herbarum
New.ReferenceOTU59	660.686	-4.9791	0.568182	-8.76323	1.8974e-18	< 0.0001	Ascomycota	Dothideomycetes	Capnodiales	Teratosphaeriaceae	unidentified	uncultured Teratosphaeriaceae
New.ReferenceOTU295	306.707	-3.03278	0.35433	-8.5592	1.13655e-17	< 0.0001	Ascomycota	Dothideomycetes	Capnodiales	unidentified	unidentified	Capnodiales sp
New.ReferenceOTU2346	426.993	-6.56988	0.779191	-8.43166	3.40799e-17	< 0.0001	Ascomycota	unidentified	unidentified	unidentified	unidentified	Ascomycota sp
New.ReferenceOTU1067	725.018	1.6371	0.201353	8.13049	4.27564e-16	< 0.0001	Ascomycota	Dothideomycetes	Pleosporales	Pleosporaceae	Lewia	Lewia infectoria
New.ReferenceOTU1311	13.1162	-5.54605	0.688341	-8.05713	7.81073e-16	< 0.0001	Ascomycota	unidentified	unidentified	unidentified	unidentified	uncultured Pezizomycotina
New.ReferenceOTU885	937.062	1.66804	0.209752	7.95245	1.82863e-15	< 0.0001	Ascomycota	Dothideomycetes	Pleosporales	Pleosporaceae	Alternaria	Alternaria eichhorniae
New.ReferenceOTU1778	11.8501	3.36059	0.423126	7.94229	1.98481e-15	< 0.0001	Basidiomycota	Exobasidiomycetes	Tilletiales	Tilletiaceae	Tilletia	Tilletia controversa
New.ReferenceOTU785	3.88949	-5.11827	0.655701	-7.8058	5.9123e-15	< 0.0001	Basidiomycota	Cystobasidiomycetes	Erythrobasidiales	unidentified	unidentified	uncultured Erythrobasidiales
New.ReferenceOTU1899	15.7964	-3.91351	0.509385	-7.68282	1.5563e-14	< 0.0001	Basidiomycota	Cystobasidiomycetes	Erythrobasidiales	Incertae sedis	Erythrobasidium	Erythrobasidium hasegawianum
New.ReferenceOTU124	27.6352	-7.14131	0.937067	-7.62092	2.51878e-14	< 0.0001	Ascomycota	unidentified	unidentified	unidentified	unidentified	Ascomycota sp
New.ReferenceOTU1208	23.1347	-4.17181	0.548144	-7.61079	2.72424e-14	< 0.0001	unidentified	unidentified	unidentified	unidentified	unidentified	fungal sp ARIZ AZ1110
New.ReferenceOTU608	102.394	-5.0058	0.658696	-7.59956	2.97147e-14	< 0.0001	Ascomycota	Dothideomycetes	Capnodiales	unidentified	unidentified	Capnodiales sp
New.ReferenceOTU2276	12.9893	-4.53022	0.600377	-7.54563	4.50113e-14	< 0.0001	Ascomycota	unidentified	unidentified	unidentified	unidentified	Ascomycota sp
New.ReferenceOTU1364	71.5581	1.91656	0.255229	7.50917	5.95039e-14	< 0.0001	Ascomycota	Dothideomycetes	Pleosporales	Pleosporaceae	Pleospora	Pleospora herbarum
New.ReferenceOTU2304	5.14731	5.58462	0.7492	7.45411	9.04753e-14	< 0.0001	unidentified	unidentified	unidentified	unidentified	unidentified	uncultured fungus
New.ReferenceOTU2503	58.2794	1.97712	0.272499	7.25552	4.00125e-13	< 0.0001	Ascomycota	Dothideomycetes	Dothideales	Dothioraceae	unidentified	Dothioraceae sp
New.ReferenceOTU1350	22.393	-7.26661	1.01956	-7.12719	1.02442e-12	< 0.0001	Ascomycota	Eurotiomycetes	Chaetothyriales	Herpotrichiellaceae	Exophiala	Exophiala sp
New.ReferenceOTU394	57.1817	-2.98247	0.421282	-7.07952	1.44656e-12	< 0.0001	Ascomycota	Dothideomycetes	Capnodiales	Teratosphaeriaceae	Teratosphaeria	Teratosphaeria knoxdavesii
New.ReferenceOTU844	89.0586	-3.8591	0.559537	-6.89694	5.31333e-12	< 0.0001	Glomeromycota	Glomeromycetes	Glomerales	Glomeraceae	unidentified	Glomeraceae sp
SH199058.07FU_JX981477_reps	17.0222	-2.98653	0.433831	-6.88409	5.81565e-12	< 0.0001	Ascomycota	Dothideomycetes	Pleosporales	unidentified	unidentified	Pleosporales sp
New.ReferenceOTU392	7.41986	-2.58198	0.378623	-6.81938	9.14323e-12	< 0.0001	Ascomycota	Lecanoromycetes	unidentified	unidentified	unidentified	Lecanoromycetes sp
New.ReferenceOTU1138	21.6372	2.36413	0.349339	6.76744	1.31077e-11	< 0.0001	Ascomycota	Dothideomycetes	Capnodiales	Mycosphaerellaceae	Mycosphaerella	Mycosphaerella sp KH00254
New.ReferenceOTU1766	26.403	-4.08966	0.614413	-6.65621	2.80981e-11	< 0.0001	Ascomycota	unidentified	unidentified	unidentified	unidentified	uncultured Pezizomycotina
New.ReferenceOTU1601	54.3126	-3.8546	0.586909	-6.56763	5.11225e-11	< 0.0001	unidentified	unidentified	unidentified	unidentified	unidentified	fungal sp P1S14
New.ReferenceOTU348	104.801	1.56606	0.240703	6.5062	7.70775e-11	< 0.0001	Ascomycota	Dothideomycetes	Pleosporales	Pleosporaceae	Chalastospora	Chalastospora ellipsoidea
New.ReferenceOTU2068	71.279	-3.53726	0.551259	-6.41669	1.39268e-10	< 0.0001	Basidiomycota	Agaricomycetes	Agaricales	unidentified	unidentified	Agaricales sp
New.ReferenceOTU1783	21.2436	-3.29859	0.521572	-6.32432	2.54343e-10	< 0.0001	Basidiomycota	Agaricomycetes	Agaricales	unidentified	unidentified	Agaricales sp
New.ReferenceOTU1354	16.0908	-3.43843	0.546782	-6.28849	3.20562e-10	< 0.0001	unidentified	unidentified	unidentified	unidentified	unidentified	fungal sp P1S14
New.ReferenceOTU1923	272.931	-4.28761	0.685788	-6.2521	4.04978e-10	< 0.0001	Ascomycota	Eurotiomycetes	Chaetothyriales	Herpotrichiellaceae	Exophiala	Exophiala eucalyptorum
New.ReferenceOTU1303	35.9054	-2.40809	0.385514	-6.24643	4.19935e-10	< 0.0001	Ascomycota	Dothideomycetes	Capnodiales	Mycosphaerellaceae	Mycosphaerella	Mycosphaerella pseudocryptica
New.ReferenceOTU1204	9.33587	-4.09663	0.65831	-6.22294	4.87919e-10	< 0.0001	Basidiomycota	unidentified	unidentified	unidentified	unidentified	Basidiomycota sp
New.ReferenceOTU2064	87.4649	-2.58498	0.415904	-6.21532	5.12198e-10	< 0.0001	Basidiomycota	Microbotryomycetes	Sporidiobolales	Incertae sedis	Sporobolomyces	Sporobolomyces gracilis
New.ReferenceOTU1927	92.9833	-2.17166	0.350722	-6.19197	5.94153e-10	< 0.0001	Ascomycota	Dothideomycetes	Pleosporales	Phaeosphaeriaceae	unidentified	Phaeosphaeriaceae sp
New.ReferenceOTU2221	74.233	2.63595	0.427175	6.17066	6.80036e-10	< 0.0001	Ascomycota	Dothideomycetes	Dothideales	Dothioraceae	Hormonema	Hormonema sp
New.ReferenceOTU1035	41.6821	2.28198	0.372077	6.13308	8.61955e-10	< 0.0001	Ascomycota	unidentified	unidentified	unidentified	unidentified	Ascomycota sp
New.ReferenceOTU932	451.372	-4.48798	0.748135	-5.99889	1.98672e-09	< 0.0001	Ascomycota	Dothideomycetes	Capnodiales	Capnodiaceae	Capnodium	Capnodium coffeae
New.ReferenceOTU2370	70.8369	-5.66317	0.951386	-5.95255	2.64002e-09	< 0.0001	Ascomycota	unidentified	unidentified	unidentified	unidentified	Ascomycota sp
New.ReferenceOTU1676	3.00371	-4.72994	0.796596	-5.93769	2.89065e-09	< 0.0001	Basidiomycota	Microbotryomycetes	Sporidiobolales	Incertae sedis	Rhodotorula	Rhodotorula armeniaca
New.ReferenceOTU2060	8.20645	-4.81465	0.814359	-5.91219	3.37581e-09	< 0.0001	Ascomycota	Dothideomycetes	Capnodiales	unidentified	unidentified	Capnodiales sp
New.ReferenceOTU1943	17.8516	2.35377	0.398436	5.90753	3.47273e-09	< 0.0001	Ascomycota	unidentified	unidentified	unidentified	unidentified	Ascomycota sp
New.ReferenceOTU872	63.6616	-3.11525	0.531173	-5.86485	4.49541e-09	< 0.0001	Ascomycota	Dothideomycetes	Capnodiales	unidentified	unidentified	Capnodiales sp
New.ReferenceOTU761	37.176	-4.84981	0.829066	-5.84973	4.9237e-09	< 0.0001	Ascomycota	Sordariomycetes	Diaporthales	Valsaceae	Cytospora	Cytospora austromontana
New.ReferenceOTU569	16.5412	-2.79378	0.47821	-5.84217	5.15267e-09	< 0.0001	Ascomycota	Lecanoromycetes	Baeomycetales	Baeomycetaceae	Ainoa	Ainoa geochroa
New.ReferenceOTU2432	95.6354	1.77408	0.304753	5.82139	5.83606e-09	< 0.0001	Basidiomycota	Tremellomycetes	Tremellales	Incertae sedis	Cryptococcus	Cryptococcus chernovii
New.ReferenceOTU1941	454.519	1.91394	0.330163	5.79695	6.75326e-09	< 0.0001	Basidiomycota	unidentified	unidentified	unidentified	unidentified	Basidiomycota sp
New.ReferenceOTU2384	45.5317	-4.05911	0.702133	-5.78111	7.42092e-09	< 0.0001	Ascomycota	Dothideomycetes	Capnodiales	unidentified	unidentified	Capnodiales sp
New.ReferenceOTU2111	9.9975	-5.30466	0.920498	-5.76281	8.27244e-09	< 0.0001	Ascomycota	Lecanoromycetes	Teloschistales	Teloschistaceae	Eilifdahlia	Eilifdahlia dahlii
New.ReferenceOTU1368	96.6551	-4.58112	0.795229	-5.76076	8.37371e-09	< 0.0001	Basidiomycota	Exobasidiomycetes	Microstromatales	Quambalariaceae	Quambalaria	Quambalaria cyanescens
New.ReferenceOTU202	7.26709	-2.70429	0.472415	-5.72438	1.0381e-08	< 0.0001	Ascomycota	Dothideomycetes	Pleosporales	Phaeosphaeriaceae	Phaeosphaeria	Phaeosphaeria triglochinicola
New.ReferenceOTU1820	3.10792	-3.74143	0.653899	-5.72173	1.05443e-08	< 0.0001	unidentified	unidentified	unidentified	unidentified	unidentified	uncultured fungus
New.ReferenceOTU1853	11.5863	2.01883	0.352588	5.72575	1.02979e-08	< 0.0001	Ascomycota	Dothideomycetes	Pleosporales	Pleosporaceae	Ulocladium	Ulocladium chartarum
New.ReferenceOTU1366	27.9117	2.16537	0.379713	5.70264	1.17965e-08	< 0.0001	Ascomycota	Sordariomycetes	Hypocreales	Nectriaceae	Fusarium	Fusarium sp
New.ReferenceOTU868	81.079	-5.6348	0.990481	-5.68895	1.27822e-08	< 0.0001	Ascomycota	Dothideomycetes	Capnodiales	Mycosphaerellaceae	Ramularia	Ramularia stellenboschensis
New.ReferenceOTU1155	33.2012	-2.46293	0.43339	-5.68296	1.32386e-08	< 0.0001	Basidiomycota	Microbotryomycetes	Sporidiobolales	Incertae sedis	Rhodotorula	Rhodotorula armeniaca
New.ReferenceOTU1963	6.16389	-4.76046	0.844527	-5.63683	1.73209e-08	< 0.0001	Basidiomycota	Ustilaginomycetes	Ustilaginales	Incertae sedis	Farysizyma	Farysizyma setubalensis
New.ReferenceOTU2379	15.2356	-4.44514	0.792397	-5.60975	2.02623e-08	< 0.0001	Ascomycota	unidentified	unidentified	unidentified	unidentified	uncultured Ascomycota
New.ReferenceOTU913	26.8062	-2.83359	0.505665	-5.60369	2.09839e-08	< 0.0001	Ascomycota	Dothideomycetes	Capnodiales	Incertae sedis	Rachicladosporium	Rachicladosporium americanum
New.ReferenceOTU1962	23.0648	-3.6701	0.663344	-5.53272	3.15296e-08	< 0.0001	Basidiomycota	Agaricostilbomycetes	unidentified	unidentified	unidentified	Agaricostilbomycetes sp
New.ReferenceOTU429	1330.93	-2.59707	0.470658	-5.51796	3.42958e-08	< 0.0001	Ascomycota	Dothideomycetes	Dothideales	Dothideaceae	Endoconidioma	Endoconidioma populi
New.ReferenceOTU1358	37.3205	1.25298	0.229003	5.47147	4.46323e-08	< 0.0001	Ascomycota	Dothideomycetes	Capnodiales	Davidiellaceae	Davidiella	Davidiella tassiana
New.ReferenceOTU1211	11.6997	1.61954	0.296069	5.47014	4.49683e-08	< 0.0001	Ascomycota	Dothideomycetes	Pleosporales	Pleosporaceae	Ulocladium	Ulocladium chartarum
New.ReferenceOTU1874	9.97772	-2.18974	0.401838	-5.44932	5.05631e-08	< 0.0001	Ascomycota	Dothideomycetes	Dothideales	Dothideaceae	Endoconidioma	Endoconidioma populi
New.ReferenceOTU1555	5.50571	-4.68511	0.861764	-5.43665	5.42912e-08	< 0.0001	unidentified	unidentified	unidentified	unidentified	unidentified	fungal sp ARIZ AZ1110
New.ReferenceOTU1346	91.4218	-2.47368	0.460303	-5.37402	7.69992e-08	< 0.0001	Glomeromycota	Glomeromycetes	Glomerales	Glomeraceae	unidentified	Glomeraceae sp
New.ReferenceOTU633	41.8346	-2.27195	0.424488	-5.3522	8.68922e-08	< 0.0001	Ascomycota	Dothideomycetes	Dothideales	Dothideaceae	Endoconidioma	Endoconidioma populi
New.ReferenceOTU1534	4.17723	-4.83189	0.903729	-5.34662	8.96142e-08	< 0.0001	Ascomycota	Eurotiomycetes	Pyrenulales	Massariaceae	Massaria	Massaria pyri
New.ReferenceOTU997	7.544	-4.70746	0.88152	-5.34017	9.28608e-08	< 0.0001	Basidiomycota	Agaricomycetes	Agaricales	unidentified	unidentified	Agaricales sp
New.ReferenceOTU854	8.78949	1.91566	0.362288	5.28768	1.2388e-07	< 0.0001	Ascomycota	Dothideomycetes	Dothideales	Dothioraceae	Hormonema	Hormonema sp F_054,258
New.ReferenceOTU983	467.608	-2.24328	0.42428	-5.28726	1.24164e-07	< 0.0001	Ascomycota	Dothideomycetes	Pleosporales	Montagnulaceae	Paraconiothyrium	Paraconiothyrium africanum
New.ReferenceOTU1562	3.76232	-4.81302	0.914664	-5.26206	1.4245e-07	< 0.0001	unidentified	unidentified	unidentified	unidentified	unidentified	uncultured fungus
New.ReferenceOTU398	34.2828	-4.92562	0.938241	-5.24985	1.52225e-07	< 0.0001	Ascomycota	Eurotiomycetes	Chaetothyriales	Chaetothyriaceae	unidentified	Chaetothyriaceae sp
New.ReferenceOTU801	31.0965	-3.24821	0.618724	-5.24986	1.52219e-07	< 0.0001	Ascomycota	Dothideomycetes	Pleosporales	Corynesporascaceae	Corynespora	Corynespora proliferata
New.ReferenceOTU2100	4.35708	-4.1246	0.786388	-5.245	1.56284e-07	< 0.0001	Basidiomycota	Agaricostilbomycetes	Agaricostilbales	Agaricostilbaceae	Bensingtonia	Bensingtonia phyllada
New.ReferenceOTU1077	3.02131	-4.17892	0.799632	-5.22606	1.73163e-07	< 0.0001	Basidiomycota	Exobasidiomycetes	Exobasidiales	Exobasidiaceae	Exobasidium	Exobasidium yoshinagae
New.ReferenceOTU1869	3.76296	-5.35966	1.02654	-5.22111	1.77852e-07	< 0.0001	Ascomycota	unidentified	unidentified	unidentified	unidentified	uncultured Ascomycota
New.ReferenceOTU1295	2.92532	-4.97455	0.958199	-5.19157	2.08531e-07	< 0.0001	Basidiomycota	Pucciniomycetes	Pachnocybales	Pachnocybaceae	Pachnocybe	Pachnocybe ferruginea
New.ReferenceOTU1476	10.0294	-5.31647	1.02801	-5.1716	2.32092e-07	< 0.0001	Ascomycota	Eurotiomycetes	Chaetothyriales	Herpotrichiellaceae	Exophiala	Exophiala eucalyptorum
New.ReferenceOTU1616	191.557	-2.13758	0.413696	-5.16702	2.37853e-07	< 0.0001	Ascomycota	Dothideomycetes	Capnodiales	Incertae sedis	Rachicladosporium	Rachicladosporium sp DoF1
New.ReferenceOTU1471	12.6138	2.25461	0.437756	5.15039	2.59951e-07	< 0.0001	Basidiomycota	Tremellomycetes	Tremellales	Incertae sedis	Cryptococcus	Cryptococcus sp
New.ReferenceOTU2397	8.56529	-2.4437	0.480565	-5.08506	3.67514e-07	< 0.0001	Ascomycota	unidentified	unidentified	unidentified	unidentified	uncultured Ascomycota
New.ReferenceOTU1076	26.0573	2.29513	0.452059	5.07706	3.83311e-07	< 0.0001	Ascomycota	Dothideomycetes	unidentified	unidentified	unidentified	Dothideomycetes sp
New.ReferenceOTU760	6.05812	2.831	0.561097	5.04547	4.52406e-07	< 0.0001	Ascomycota	Dothideomycetes	unidentified	unidentified	unidentified	Dothideomycetes sp
New.ReferenceOTU2094	3.90646	-2.91458	0.579053	-5.03336	4.81955e-07	< 0.0001	Ascomycota	Dothideomycetes	Pleosporales	Phaeosphaeriaceae	Sclerostagonospora	Sclerostagonospora sp CBS 118224
New.ReferenceOTU1991	12.5271	-3.66137	0.730142	-5.0146	5.31447e-07	< 0.0001	Basidiomycota	Agaricomycetes	Agaricales	unidentified	unidentified	Agaricales sp
New.ReferenceOTU1424	156.679	-1.82531	0.370259	-4.92983	8.23013e-07	< 0.0001	Ascomycota	Dothideomycetes	Botryosphaeriales	Botryosphaeriaceae	Dothiorella	Dothiorella vidmadera
New.ReferenceOTU2126	7.31451	2.22709	0.452167	4.92537	8.42014e-07	< 0.0001	Ascomycota	Dothideomycetes	Pleosporales	Incertae sedis	Didymella	Didymella sp
New.ReferenceOTU1900	26.3299	4.83263	0.983525	4.91358	8.94288e-07	< 0.0001	Ascomycota	Saccharomycetes	Saccharomycetales	Metschnikowiaceae	Metschnikowia	Metschnikowia chrysoperlae
New.ReferenceOTU1050	827.943	-1.78051	0.366962	-4.85203	1.22202e-06	< 0.0001	Ascomycota	Dothideomycetes	Dothideales	Dothideaceae	Endoconidioma	Endoconidioma populi
New.ReferenceOTU967	3.10409	-3.54006	0.732507	-4.8328	1.34627e-06	< 0.0001	Ascomycota	unidentified	unidentified	unidentified	unidentified	uncultured Ascomycota
New.ReferenceOTU1496	44.0787	1.97827	0.411777	4.80423	1.55347e-06	< 0.0001	unidentified	unidentified	unidentified	unidentified	unidentified	Fungi sp
New.ReferenceOTU905	387.659	-2.95991	0.616245	-4.80314	1.56195e-06	< 0.0001	Ascomycota	Dothideomycetes	Capnodiales	Incertae sedis	Toxicocladosporium	Toxicocladosporium leucadendri
New.ReferenceOTU1244	2.29689	-4.66427	0.97721	-4.77305	1.81458e-06	< 0.0001	Ascomycota	unidentified	unidentified	unidentified	unidentified	Ascomycota sp
New.ReferenceOTU665	32.7372	3.69903	0.775698	4.76865	1.85467e-06	< 0.0001	Ascomycota	Dothideomycetes	Pleosporales	unidentified	unidentified	Pleosporales sp
New.ReferenceOTU1084	73.5623	-1.98368	0.416694	-4.76053	1.9309e-06	< 0.0001	Ascomycota	unidentified	unidentified	unidentified	unidentified	Ascomycota sp
New.ReferenceOTU2498	133.001	-2.40472	0.505193	-4.76	1.93588e-06	< 0.0001	Ascomycota	Dothideomycetes	unidentified	unidentified	unidentified	Dothideomycetes sp
New.ReferenceOTU1018	3.44196	-3.96166	0.832864	-4.75667	1.96815e-06	< 0.0001	Ascomycota	Dothideomycetes	Capnodiales	unidentified	unidentified	Neodevriesiaceae sp CCFEE 5569
New.ReferenceOTU963	9.45272	-2.83564	0.597047	-4.74944	2.03981e-06	< 0.0001	Glomeromycota	Glomeromycetes	Glomerales	Glomeraceae	unidentified	Glomeraceae sp
New.ReferenceOTU2079	4.95694	-4.22071	0.890636	-4.73899	2.14791e-06	< 0.0001	Ascomycota	Dothideomycetes	Capnodiales	unidentified	unidentified	Capnodiales sp
New.ReferenceOTU763	6.46232	-3.66887	0.778518	-4.71263	2.4454e-06	< 0.0001	Ascomycota	Eurotiomycetes	Chaetothyriales	Herpotrichiellaceae	Phaeomoniella	Phaeomoniella sp
New.ReferenceOTU907	3.88521	-3.75354	0.798139	-4.70287	2.56533e-06	< 0.0001	Basidiomycota	Tremellomycetes	Tremellales	Incertae sedis	Dioszegia	Dioszegia zsoltii var. yunnanensis
New.ReferenceOTU895	205.202	-3.7039	0.790794	-4.68377	2.81648e-06	< 0.0001	Ascomycota	Dothideomycetes	Pleosporales	unidentified	unidentified	fungal endophyte WMS23
New.ReferenceOTU2309	5.77038	-3.14788	0.672373	-4.68174	2.84448e-06	< 0.0001	Ascomycota	Dothideomycetes	unidentified	unidentified	unidentified	Dothideomycetes sp
New.ReferenceOTU707	4.2268	2.26057	0.483247	4.67788	2.8985e-06	< 0.0001	Ascomycota	Dothideomycetes	unidentified	unidentified	unidentified	Dothideomycetes sp
New.ReferenceOTU2067	6.98113	-3.62776	0.777293	-4.66717	3.05371e-06	< 0.0001	Ascomycota	Dothideomycetes	Myriangiales	unidentified	unidentified	Myriangiales sp
New.ReferenceOTU448	223.461	1.72405	0.369654	4.66396	3.10178e-06	< 0.0001	Basidiomycota	Ustilaginomycetes	Ustilaginales	Ustilaginaceae	Ustilago	Ustilago maydis
New.ReferenceOTU1089	8.49304	-2.35645	0.509213	-4.62764	3.69859e-06	< 0.0001	unidentified	unidentified	unidentified	unidentified	unidentified	fungal sp P1S14
New.ReferenceOTU1057	3.94963	-3.81191	0.824356	-4.62411	3.76216e-06	< 0.0001	Ascomycota	Incertae sedis	Incertae sedis	Incertae sedis	Radulidium	Radulidium sp
New.ReferenceOTU1458	15.7915	-2.69614	0.585058	-4.60834	4.05896e-06	< 0.0001	Ascomycota	Dothideomycetes	Capnodiales	unidentified	unidentified	Capnodiales sp
New.ReferenceOTU1922	39.206	-2.61526	0.572046	-4.57178	4.83608e-06	< 0.0001	Ascomycota	Dothideomycetes	Botryosphaeriales	Incertae sedis	Camarosporium	Camarosporium aloes
New.ReferenceOTU626	5.19369	-4.11261	0.899223	-4.57351	4.79613e-06	< 0.0001	Ascomycota	Dothideomycetes	Pleosporales	unidentified	unidentified	Pleosporales sp
New.ReferenceOTU972	29.6899	-2.17857	0.478805	-4.55002	5.36406e-06	< 0.0001	Ascomycota	Dothideomycetes	Capnodiales	Mycosphaerellaceae	unidentified	uncultured Mycosphaerellaceae
New.ReferenceOTU1395	9.1332	3.23815	0.716102	4.52191	6.12849e-06	< 0.0001	Ascomycota	Dothideomycetes	Pleosporales	Pleosporaceae	unidentified	Pleosporaceae sp
New.ReferenceOTU1421	21.0952	2.79568	0.61925	4.51462	6.3429e-06	< 0.0001	Basidiomycota	Tremellomycetes	Tremellales	Incertae sedis	Cryptococcus	Cryptococcus saitoi
New.ReferenceOTU1771	80.399	-3.8611	0.855252	-4.51457	6.34442e-06	< 0.0001	Ascomycota	unidentified	unidentified	unidentified	unidentified	uncultured Ascomycota
New.ReferenceOTU1449	3.61642	4.19703	0.929461	4.51555	6.31533e-06	< 0.0001	Basidiomycota	Ustilaginomycetes	Urocystidales	Glomosporiaceae	Thecaphora	Thecaphora oxytropis
New.ReferenceOTU310	12.1264	-3.99096	0.893949	-4.46442	8.02855e-06	5.2153e-05	Ascomycota	Dothideomycetes	Capnodiales	Teratosphaeriaceae	unidentified	Teratosphaeriaceae sp
New.ReferenceOTU2091	16.2377	-2.7878	0.625601	-4.4562	8.34264e-06	5.37562e-05	Ascomycota	unidentified	unidentified	unidentified	unidentified	uncultured Ascomycota
New.ReferenceOTU1749	27.2779	-2.26802	0.513925	-4.41314	1.01883e-05	6.46069e-05	Ascomycota	Dothideomycetes	unidentified	unidentified	unidentified	Dothideomycetes sp
New.ReferenceOTU2049	267.404	-1.93393	0.438098	-4.41438	1.01298e-05	6.46069e-05	Ascomycota	Dothideomycetes	Capnodiales	Davidiellaceae	Cladosporium	Cladosporium sphaerospermum
New.ReferenceOTU2431	9.23307	-2.74729	0.624691	-4.39785	1.0933e-05	6.87831e-05	Ascomycota	Dothideomycetes	Pleosporales	Incertae sedis	Phoma	Phoma sp
New.ReferenceOTU1197	2.18071	-3.84195	0.876069	-4.38544	1.15751e-05	7.2254e-05	Ascomycota	Eurotiomycetes	Chaetothyriales	Herpotrichiellaceae	Rhinocladiella	Rhinocladiella sp
New.ReferenceOTU675	43.7795	-2.73598	0.625007	-4.37752	1.20036e-05	7.4348e-05	Ascomycota	Dothideomycetes	Dothideales	unidentified	unidentified	Dothideales sp
New.ReferenceOTU767	4.29743	-3.59553	0.821807	-4.37515	1.21349e-05	7.45827e-05	Ascomycota	Leotiomycetes	Helotiales	Incertae sedis	Chlorencoelia	Chlorencoelia torta
New.ReferenceOTU122	8.68176	-4.21759	0.969848	-4.34871	1.36941e-05	8.35234e-05	Ascomycota	unidentified	unidentified	unidentified	unidentified	Ascomycota sp
New.ReferenceOTU483	116.319	-1.49302	0.343751	-4.34331	1.40355e-05	8.49571e-05	Ascomycota	Eurotiomycetes	Chaetothyriales	Incertae sedis	Coniosporium	Coniosporium sp h6
New.ReferenceOTU179	1.98245	-3.54243	0.816156	-4.34038	1.42235e-05	8.54482e-05	Ascomycota	Dothideomycetes	Dothideales	Dothideaceae	Dothidea	Dothidea sp CanS_64
New.ReferenceOTU1284	7.67344	-2.85767	0.660202	-4.32849	1.50137e-05	8.95219e-05	Ascomycota	Dothideomycetes	Capnodiales	Teratosphaeriaceae	Catenulostroma	Catenulostroma hermanusense
New.ReferenceOTU2308	2.71165	3.52739	0.817219	4.31634	1.5864e-05	9.38914e-05	Basidiomycota	Microbotryomycetes	Sporidiobolales	Incertae sedis	Rhodotorula	Rhodotorula sp DT3
New.CleanUp.ReferenceOTU3229	11.0801	-1.63216	0.37904	-4.30603	1.66211e-05	9.7649e-05	Ascomycota	Dothideomycetes	Dothideales	Dothideaceae	Endoconidioma	Endoconidioma populi
New.ReferenceOTU2052	2.90501	4.43234	1.03728	4.27303	1.92836e-05	0.000112464	Ascomycota	Dothideomycetes	unidentified	unidentified	unidentified	Dothideomycetes sp
New.ReferenceOTU503	9.06003	-2.97629	0.697955	-4.26429	2.00536e-05	0.000116107	Ascomycota	Dothideomycetes	Capnodiales	Mycosphaerellaceae	Ramularia	Ramularia sp
New.ReferenceOTU1001	94.9671	-2.03764	0.478237	-4.26074	2.03754e-05	0.000116527	Ascomycota	unidentified	unidentified	unidentified	unidentified	Ascomycota sp
New.ReferenceOTU1296	2.47214	3.21487	0.754616	4.26027	2.04177e-05	0.000116527	Basidiomycota	Tremellomycetes	unidentified	unidentified	unidentified	Tremellomycetes sp
New.ReferenceOTU1743	6.40459	-3.90663	0.919055	-4.2507	2.13104e-05	0.000120759	Basidiomycota	Agaricomycetes	Corticiales	Corticiaceae	unidentified	uncultured Sistotrema
New.ReferenceOTU318	1.8028	3.32277	0.790852	4.2015	2.65147e-05	0.000149192	Ascomycota	Sordariomycetes	Hypocreales	Nectriaceae	Fusarium	Fusarium proliferatum
New.ReferenceOTU1091	1054.35	-1.53792	0.367868	-4.18062	2.90719e-05	0.000161309	Ascomycota	Dothideomycetes	Dothideales	Dothideaceae	Endoconidioma	Endoconidioma populi
New.ReferenceOTU423	2.67207	2.73404	0.653955	4.18078	2.90508e-05	0.000161309	Ascomycota	Dothideomycetes	unidentified	unidentified	unidentified	Dothideomycetes sp
New.ReferenceOTU2212	26.1018	-4.19531	1.00578	-4.1712	3.03005e-05	0.000166966	Ascomycota	Dothideomycetes	Capnodiales	Mycosphaerellaceae	unidentified	Mycosphaerellaceae sp
New.ReferenceOTU378	20.8844	-2.47068	0.59306	-4.16599	3.09998e-05	0.00016965	unidentified	unidentified	unidentified	unidentified	unidentified	uncultured fungus
New.ReferenceOTU148	5.87341	-3.6554	0.880772	-4.15022	3.32157e-05	0.00018054	Ascomycota	unidentified	unidentified	unidentified	unidentified	uncultured Pezizomycotina
New.ReferenceOTU920	131.237	-1.95294	0.470893	-4.14732	3.36388e-05	0.000181604	Ascomycota	Dothideomycetes	Dothideales	Dothideaceae	Endoconidioma	Endoconidioma populi
New.ReferenceOTU2423	3.16255	1.99447	0.483691	4.12343	3.73276e-05	0.000200166	Ascomycota	Dothideomycetes	Pleosporales	Pleosporaceae	Ulocladium	Ulocladium chartarum
New.ReferenceOTU74	1.52961	2.69257	0.655382	4.1084	3.98414e-05	0.000212222	Ascomycota	Dothideomycetes	Pleosporales	Pleosporaceae	Ulocladium	Ulocladium chartarum
New.ReferenceOTU1519	4.98958	-2.89887	0.707311	-4.09844	4.15935e-05	0.000220088	Ascomycota	Dothideomycetes	Pleosporales	Cucurbitariaceae	Curreya	Curreya sp
New.ReferenceOTU1592	96.7487	2.29428	0.56063	4.09232	4.27078e-05	0.000224497	Ascomycota	Dothideomycetes	Pleosporales	Dothidotthiaceae	Spencermartinsia	Spencermartinsia rosulata
New.ReferenceOTU1607	4.26696	-2.80977	0.689401	-4.07566	4.58836e-05	0.000239614	Ascomycota	Dothideomycetes	Pleosporales	Corynesporascaceae	Corynespora	Corynespora proliferata
New.ReferenceOTU897	7081.55	-1.5128	0.372425	-4.06203	4.86475e-05	0.000252398	Ascomycota	Dothideomycetes	Dothideales	Dothioraceae	Aureobasidium	Aureobasidium pullulans
New.ReferenceOTU1418	16.1531	2.08374	0.513291	4.05957	4.91633e-05	0.000253429	Ascomycota	Eurotiomycetes	Chaetothyriales	Herpotrichiellaceae	Phaeococcomyces	Phaeococcomyces aff nigricans P40D010
New.ReferenceOTU298	1.98274	3.48866	0.861101	4.0514	5.09124e-05	0.000260763	Ascomycota	Dothideomycetes	unidentified	unidentified	unidentified	Dothideomycetes sp
New.ReferenceOTU1969	4.61478	-3.40734	0.846219	-4.02655	5.66006e-05	0.00028805	Ascomycota	Dothideomycetes	Dothideales	Dothideaceae	Endoconidioma	Endoconidioma populi
New.ReferenceOTU1849	9.02314	-3.32565	0.830212	-4.00578	6.18127e-05	0.000312585	Ascomycota	Lecanoromycetes	Ostropales	unidentified	unidentified	Ostropales sp s056
New.ReferenceOTU533	2.21173	-4.42408	1.11045	-3.98405	6.77494e-05	0.000340451	Ascomycota	Dothideomycetes	Myriangiales	Elsinoaceae	unidentified	Elsinoaceae sp ZLY_2010b
New.ReferenceOTU1405	2.91986	-4.63325	1.17684	-3.93703	8.24947e-05	0.000411958	unidentified	unidentified	unidentified	unidentified	unidentified	fungal endophyte
New.ReferenceOTU927	4.22251	3.19409	0.812343	3.93194	8.42624e-05	0.000418172	Ascomycota	Dothideomycetes	Pleosporales	Pleosporaceae	unidentified	Pleosporaceae sp
New.ReferenceOTU1805	3.18274	-2.50196	0.640223	-3.90794	9.30846e-05	0.000459103	Ascomycota	Sordariomycetes	Diaporthales	Diaporthaceae	Diaporthe	Diaporthe viticola
New.ReferenceOTU1920	4.70783	2.35056	0.601882	3.90535	9.40891e-05	0.00046121	Basidiomycota	Agaricomycetes	Agaricales	Psathyrellaceae	Coprinellus	Coprinellus eurysporus
New.ReferenceOTU1696	21.4241	-2.93564	0.752164	-3.90293	9.50347e-05	0.000463004	Basidiomycota	Agaricomycetes	Agaricales	unidentified	unidentified	Agaricales sp
New.ReferenceOTU2461	7.16169	-3.02812	0.779522	-3.88459	0.000102504	0.000496366	Ascomycota	Taphrinomycetes	Taphrinales	Taphrinaceae	Lalaria	Lalaria carpini
New.ReferenceOTU2491	1.9943	3.29188	0.849194	3.87647	0.000105982	0.00051012	Ascomycota	Dothideomycetes	Pleosporales	Pleosporaceae	unidentified	Pleosporaceae sp
New.ReferenceOTU390	7.2642	2.50625	0.649524	3.85859	0.000114042	0.00054238	Ascomycota	Dothideomycetes	Pleosporales	Pleosporaceae	Alternaria	Alternaria leptinellae
New.ReferenceOTU2368	23.4062	1.70665	0.442163	3.85979	0.000113487	0.00054238	Basidiomycota	Ustilaginomycetes	Ustilaginales	Ustilaginaceae	unidentified	Ustilaginaceae sp
New.ReferenceOTU482	3.66471	1.95876	0.508785	3.84987	0.000118179	0.000558726	Ascomycota	Dothideomycetes	Capnodiales	unidentified	unidentified	Capnodiales sp
New.ReferenceOTU1631	3.26868	2.52162	0.655337	3.84783	0.000119169	0.000560096	Ascomycota	Sordariomycetes	Hypocreales	Nectriaceae	unidentified	Nectriaceae sp
New.ReferenceOTU2487	1.61216	-4.15379	1.08248	-3.83729	0.000124401	0.000581267	Ascomycota	unidentified	unidentified	unidentified	unidentified	Ascomycota sp
New.ReferenceOTU714	2.20885	-3.55418	0.928153	-3.82931	0.000128506	0.000593503	Basidiomycota	Pucciniomycetes	Septobasidiales	Septobasidiaceae	Septobasidium	Septobasidium carestianum
New.ReferenceOTU2455	4.79467	-4.84819	1.26566	-3.83058	0.000127843	0.000593503	Ascomycota	Dothideomycetes	Capnodiales	Mycosphaerellaceae	Passalora	Passalora californica
New.ReferenceOTU2530	9.62691	-1.64705	0.430415	-3.82666	0.000129893	0.000596464	Ascomycota	Dothideomycetes	Capnodiales	Mycosphaerellaceae	unidentified	uncultured Mycosphaerellaceae
New.ReferenceOTU166	6.52878	-2.43265	0.636198	-3.82373	0.000131449	0.00060016	Ascomycota	Dothideomycetes	Pleosporales	Cucurbitariaceae	Curreya	Curreya sp
New.ReferenceOTU203	108.673	2.09204	0.549567	3.80671	0.000140828	0.000639329	Basidiomycota	Microbotryomycetes	Sporidiobolales	Incertae sedis	Sporobolomyces	Sporobolomyces sp JCM 11360
New.ReferenceOTU1313	11.9449	-2.19766	0.578433	-3.79933	0.000145091	0.000653836	Ascomycota	unidentified	unidentified	unidentified	unidentified	uncultured Ascomycota
New.ReferenceOTU1527	10.5892	-2.18756	0.575924	-3.79835	0.000145661	0.000653836	Ascomycota	unidentified	unidentified	unidentified	unidentified	Ascomycota sp
New.ReferenceOTU1959	0.974318	3.04292	0.804097	3.78426	0.000154164	0.000684316	Basidiomycota	Tremellomycetes	Tremellales	Incertae sedis	Cryptococcus	Cryptococcus aureus
New.ReferenceOTU651	1.29581	-3.30124	0.872261	-3.78469	0.000153898	0.000684316	Ascomycota	Dothideomycetes	Capnodiales	Davidiellaceae	Cladosporium	Cladosporium exasperatum
New.ReferenceOTU825	4.98175	-2.6415	0.702312	-3.76115	0.000169131	0.000746605	Chytridiomycota	unidentified	unidentified	unidentified	unidentified	uncultured Chytridiomycota
New.ReferenceOTU698	10.149	1.53058	0.408947	3.74274	0.000182028	0.000799123	Ascomycota	Dothideomycetes	Patellariales	Patellariaceae	Rhytidhysteron	Rhytidhysteron sp
New.ReferenceOTU929	28.4806	-2.26269	0.612426	-3.69463	0.000220209	0.000961459	Ascomycota	Sordariomycetes	Xylariales	Diatrypaceae	unidentified	Diatrypaceae sp
New.ReferenceOTU1442	4.91631	-2.4325	0.659621	-3.68772	0.000226276	0.00098258	Ascomycota	Incertae sedis	Incertae sedis	Incertae sedis	Knufia	Knufia sp FH_2012
New.ReferenceOTU498	2.58362	-4.14215	1.12381	-3.68581	0.000227975	0.000984607	Ascomycota	Dothideomycetes	Capnodiales	Teratosphaeriaceae	Devriesia	Devriesia hilliana
New.ReferenceOTU808	2.17112	-4.57606	1.24256	-3.68277	0.000230711	0.000991066	Basidiomycota	Exobasidiomycetes	Exobasidiales	Exobasidiaceae	Exobasidium	Exobasidium formosanum
New.ReferenceOTU1921	3.62677	-3.28086	0.892763	-3.67495	0.000237896	0.00101646	Ascomycota	Dothideomycetes	Capnodiales	Mycosphaerellaceae	Mycosphaerella	Mycosphaerella sp CPC 12200
New.ReferenceOTU2089	2.5884	-4.82995	1.31884	-3.66228	0.000249981	0.00106242	Basidiomycota	Tremellomycetes	Tremellales	Incertae sedis	Trimorphomyces	Trimorphomyces papilionaceus
New.ReferenceOTU909	5.32238	-2.06521	0.564146	-3.66077	0.00025146	0.00106305	Ascomycota	Lecanoromycetes	Ostropales	Stictidaceae	Schizoxylon	Schizoxylon albescens
New.ReferenceOTU422	53.4172	-3.33161	0.910619	-3.65862	0.000253578	0.00106636	Ascomycota	Eurotiomycetes	Chaetothyriales	Herpotrichiellaceae	unidentified	uncultured Herpotrichiellaceae
New.ReferenceOTU2369	10.6921	-2.27426	0.622579	-3.65296	0.000259233	0.00108444	unidentified	unidentified	unidentified	unidentified	unidentified	uncultured fungus
New.ReferenceOTU1454	25.8614	-2.08318	0.573507	-3.63236	0.000280843	0.00116872	Ascomycota	Dothideomycetes	Dothideales	Dothioraceae	Aureobasidium	Aureobasidium pullulans
New.ReferenceOTU116	2.2111	-3.43329	0.950167	-3.61335	0.000302261	0.00124488	Ascomycota	Dothideomycetes	Capnodiales	unidentified	unidentified	Capnodiales sp
New.ReferenceOTU1792	8.48354	-3.43381	0.950084	-3.61421	0.000301262	0.00124488	Ascomycota	Dothideomycetes	Pleosporales	Phaeosphaeriaceae	Sclerostagonospora	Sclerostagonospora sp
New.ReferenceOTU142	3.77458	-1.87911	0.520944	-3.60713	0.000309601	0.00126857	Ascomycota	Dothideomycetes	Pleosporales	Montagnulaceae	Paraconiothyrium	Paraconiothyrium hawaiiense
New.ReferenceOTU1131	2.47328	-4.70313	1.30931	-3.59207	0.000328058	0.00132383	Ascomycota	Eurotiomycetes	Chaetothyriales	Herpotrichiellaceae	Phaeomoniella	Phaeomoniella sp
New.ReferenceOTU200	1.91135	-4.3844	1.22	-3.59378	0.000325911	0.00132383	Basidiomycota	Agaricomycetes	Agaricales	unidentified	unidentified	Agaricales sp
New.ReferenceOTU1838	4.36406	-5.05938	1.408	-3.59332	0.000326494	0.00132383	Ascomycota	Sordariomycetes	Diaporthales	Diaporthaceae	Phomopsis	Phomopsis sp NY7453a
New.ReferenceOTU2327	20.4203	-2.14748	0.598412	-3.58863	0.000332418	0.00133469	Basidiomycota	unidentified	unidentified	unidentified	unidentified	uncultured Basidiomycota
New.ReferenceOTU2092	40.4927	-1.49522	0.417036	-3.58534	0.000336633	0.00134485	Ascomycota	Dothideomycetes	Capnodiales	Incertae sedis	Arthrocatena	Arthrocatena tenebrio
New.ReferenceOTU1685	7.21677	-2.17329	0.608321	-3.57261	0.00035344	0.00140497	Ascomycota	Leotiomycetes	Helotiales	Incertae sedis	Phacidiella	Phacidiella eucalypti
New.ReferenceOTU70	17114.6	0.841566	0.236354	3.56061	0.000369991	0.00146348	Ascomycota	Dothideomycetes	Capnodiales	Davidiellaceae	Davidiella	Davidiella tassiana
New.ReferenceOTU1113	12.9536	1.66865	0.469141	3.55681	0.000375384	0.0014775	Ascomycota	Sordariomycetes	Diaporthales	Incertae sedis	Harknessia	Harknessia ravenstreetina
New.ReferenceOTU1347	1.35069	-3.25939	0.921879	-3.53559	0.000406864	0.00159355	Ascomycota	Dothideomycetes	Capnodiales	Teratosphaeriaceae	unidentified	uncultured Teratosphaeriaceae
New.ReferenceOTU882	2.80098	-4.37257	1.2551	-3.48383	0.000494286	0.00192651	unidentified	unidentified	unidentified	unidentified	unidentified	Fungi sp
New.ReferenceOTU506	2.53383	4.37541	1.25725	3.48014	0.000501155	0.0019438	Ascomycota	Dothideomycetes	Pleosporales	unidentified	unidentified	Pleosporales sp
New.ReferenceOTU1177	3.56244	2.10443	0.608194	3.46013	0.000539924	0.00208405	Basidiomycota	Microbotryomycetes	Sporidiobolales	Incertae sedis	Sporobolomyces	Sporobolomyces ruberrimus
New.ReferenceOTU2234	4.9661	-3.02795	0.880483	-3.43896	0.000583945	0.00224313	Ascomycota	Eurotiomycetes	Chaetothyriales	unidentified	unidentified	Chaetothyriales sp
New.ReferenceOTU1376	3.08903	3.01633	0.878833	3.4322	0.000598695	0.00227789	unidentified	unidentified	unidentified	unidentified	unidentified	Fungi sp
New.ReferenceOTU1504	3.28921	2.43944	0.710639	3.43274	0.000597506	0.00227789	Ascomycota	Sordariomycetes	Hypocreales	Hypocreaceae	unidentified	Hypocreaceae sp
New.ReferenceOTU2495	1.81059	-3.55883	1.04261	-3.41338	0.00064162	0.00242964	Ascomycota	Dothideomycetes	Dothideales	Dothioraceae	Aureobasidium	Aureobasidium pullulans
New.ReferenceOTU1889	3.66171	-3.2973	0.972495	-3.39056	0.000697507	0.00262881	Ascomycota	Dothideomycetes	Capnodiales	Teratosphaeriaceae	unidentified	uncultured Teratosphaeriaceae
New.ReferenceOTU1181	79.383	-2.2294	0.659303	-3.38144	0.00072106	0.00270482	Ascomycota	Dothideomycetes	Dothideales	Dothioraceae	Pringsheimia	Pringsheimia sp
New.ReferenceOTU2023	1.50571	2.36744	0.701203	3.37626	0.000734797	0.00274347	Ascomycota	Incertae sedis	Incertae sedis	Incertae sedis	Torula	Torula sp
New.ReferenceOTU1964	7.38304	-1.59533	0.472917	-3.37339	0.000742488	0.00275929	Ascomycota	Dothideomycetes	Dothideales	Dothideaceae	Endoconidioma	Endoconidioma populi
New.ReferenceOTU1003	1.96881	-3.1809	0.946274	-3.3615	0.000775208	0.00286755	unidentified	unidentified	unidentified	unidentified	unidentified	uncultured fungus
New.ReferenceOTU349	2.138	-2.86825	0.855495	-3.35274	0.000800147	0.00293265	Basidiomycota	Tremellomycetes	Tremellales	Incertae sedis	Dioszegia	Dioszegia zsoltii var. yunnanensis
New.ReferenceOTU2385	4.27766	1.62786	0.485349	3.35399	0.000796561	0.00293265	Ascomycota	Dothideomycetes	Pleosporales	Pleosporaceae	Alternaria	Alternaria eichhorniae
New.ReferenceOTU2290	1.39874	3.17904	0.950096	3.34602	0.000819795	0.00299094	Ascomycota	Dothideomycetes	Capnodiales	Mycosphaerellaceae	Phaeothecoidea	Phaeothecoidea minutispora
New.ReferenceOTU2317	25.4566	1.65939	0.496349	3.3432	0.000828189	0.00300783	Ascomycota	Sordariomycetes	Sordariales	Sordariaceae	Sordaria	Sordaria sp SS_1479
New.ReferenceOTU528	1.2423	-3.62816	1.08598	-3.34091	0.000835045	0.00301901	Ascomycota	Dothideomycetes	Capnodiales	Davidiellaceae	Cladosporium	Cladosporium fusiforme
New.ReferenceOTU680	8.87602	1.28616	0.38646	3.32806	0.000874535	0.00314754	Ascomycota	Dothideomycetes	Capnodiales	Davidiellaceae	Davidiella	Davidiella tassiana
New.ReferenceOTU2404	1.61859	3.74821	1.12708	3.3256	0.000882299	0.00316124	Ascomycota	Dothideomycetes	Dothideales	Dothioraceae	Aureobasidium	Aureobasidium pullulans
New.ReferenceOTU2424	6.27692	-2.07289	0.625466	-3.31414	0.000919238	0.00327889	Ascomycota	Dothideomycetes	Pleosporales	unidentified	unidentified	Pleosporales sp
New.ReferenceOTU2202	9.51417	-1.61098	0.488778	-3.29592	0.000980983	0.00348358	Ascomycota	Eurotiomycetes	Chaetothyriales	unidentified	unidentified	Chaetothyriales sp
New.ReferenceOTU2168	8.92163	-1.35682	0.411904	-3.29402	0.000987644	0.00349171	Ascomycota	Dothideomycetes	Capnodiales	Davidiellaceae	Cladosporium	Cladosporium fusiforme
New.ReferenceOTU1888	10.514	1.42885	0.434197	3.2908	0.000999038	0.00351644	Basidiomycota	Ustilaginomycetes	Ustilaginales	Ustilaginaceae	unidentified	Ustilaginaceae sp
New.ReferenceOTU879	4.63744	-2.74369	0.838681	-3.27144	0.00107003	0.00374979	Ascomycota	Sordariomycetes	Xylariales	Amphisphaeriaceae	Pestalotiopsis	Pestalotiopsis sp E_000535668
New.ReferenceOTU2018	2.63688	2.66425	0.818548	3.25485	0.00113453	0.00395848	Ascomycota	Dothideomycetes	Pleosporales	Pleosporaceae	Pyrenophora	Pyrenophora avenae
New.ReferenceOTU102	3.4276	2.06643	0.638442	3.23667	0.00120931	0.00420104	Basidiomycota	Tremellomycetes	Tremellales	Incertae sedis	Cryptococcus	Cryptococcus magnus
New.ReferenceOTU1215	1.81701	2.97729	0.922767	3.22648	0.00125322	0.00433474	Ascomycota	Dothideomycetes	Capnodiales	Mycosphaerellaceae	Phaeothecoidea	Phaeothecoidea sp NO235a
New.ReferenceOTU1286	11.3987	-1.6726	0.520085	-3.21602	0.00129983	0.00447658	Ascomycota	Dothideomycetes	Pleosporales	Montagnulaceae	Paraphaeosphaeria	Paraphaeosphaeria michotii
New.ReferenceOTU427	3.93015	-4.06554	1.26727	-3.2081	0.00133615	0.0045819	Ascomycota	Dothideomycetes	Myriangiales	Elsinoaceae	unidentified	Elsinoaceae sp KNUC262
New.ReferenceOTU2474	2.67558	2.03771	0.635959	3.20415	0.00135463	0.00462543	Ascomycota	Dothideomycetes	Capnodiales	Davidiellaceae	Davidiella	Davidiella tassiana
New.ReferenceOTU1319	8.66663	-2.35276	0.735363	-3.19945	0.00137689	0.00468142	Ascomycota	Dothideomycetes	Capnodiales	unidentified	unidentified	Capnodiales sp
New.ReferenceOTU614	2.37567	-3.44007	1.07782	-3.19167	0.0014145	0.00478894	Ascomycota	Dothideomycetes	Capnodiales	Incertae sedis	Capnobotryella	Capnobotryella sp
New.ReferenceOTU1162	3.52342	-2.05417	0.645326	-3.18315	0.00145683	0.00491143	Ascomycota	Dothideomycetes	Capnodiales	Incertae sedis	Toxicocladosporium	Toxicocladosporium leucadendri
New.ReferenceOTU514	19.7505	-1.51028	0.475605	-3.17548	0.00149587	0.00502186	Ascomycota	unidentified	unidentified	unidentified	unidentified	ascomycete sp IZ_962
New.ReferenceOTU2078	8.31313	2.31808	0.732361	3.16521	0.00154972	0.00518086	Ascomycota	Sordariomycetes	Xylariales	Amphisphaeriaceae	Pestalotiopsis	Pestalotiopsis sp HC02
New.ReferenceOTU1156	2.2115	-3.06783	0.97292	-3.15322	0.00161478	0.00537586	Ascomycota	Dothideomycetes	unidentified	unidentified	unidentified	Dothideomycetes sp
New.ReferenceOTU2200	5.5325	-2.0384	0.647492	-3.14814	0.00164312	0.00540268	Ascomycota	Sordariomycetes	unidentified	unidentified	unidentified	Sordariomycetes sp MX17
New.ReferenceOTU835	14.3986	-2.64842	0.841099	-3.14877	0.0016396	0.00540268	Ascomycota	Dothideomycetes	Incertae sedis	Incertae sedis	Phaeosclera	Phaeosclera sp
New.ReferenceOTU2427	3.21801	-3.12905	0.993733	-3.14878	0.00163954	0.00540268	Ascomycota	Dothideomycetes	Myriangiales	Incertae sedis	Endosporium	Endosporium sp
New.ReferenceOTU1056	25.6056	1.26057	0.400759	3.14545	0.00165834	0.00543037	Ascomycota	Dothideomycetes	Pleosporales	unidentified	unidentified	Pleosporales sp
New.ReferenceOTU1436	3.20035	-2.24987	0.719386	-3.12749	0.00176308	0.00574979	Ascomycota	Sordariomycetes	Sordariales	Sordariaceae	Neurospora	Neurospora crassa
New.ReferenceOTU2196	6.54702	1.94772	0.62398	3.12145	0.00179964	0.0058443	Ascomycota	Dothideomycetes	Pleosporales	Pleosporaceae	unidentified	Pleosporaceae sp
New.ReferenceOTU1655	1.60399	2.70259	0.866131	3.1203	0.00180669	0.0058443	Basidiomycota	Agaricomycetes	Agaricales	Psathyrellaceae	Coprinopsis	Coprinopsis atramentaria
New.ReferenceOTU839	7.79907	1.88683	0.605791	3.11465	0.00184164	0.00593334	Ascomycota	Dothideomycetes	Botryosphaeriales	Botryosphaeriaceae	Diplodia	Diplodia subglobosa
New.ReferenceOTU1880	82.7887	-0.741152	0.238399	-3.10888	0.001878	0.00602618	Ascomycota	Dothideomycetes	Capnodiales	Mycosphaerellaceae	Mycosphaerella	Mycosphaerella pseudocryptica
New.ReferenceOTU1269	3.70134	-1.96594	0.63593	-3.09145	0.00199185	0.00636594	Ascomycota	Dothideomycetes	Capnodiales	Davidiellaceae	Cladosporium	Cladosporium exasperatum
New.ReferenceOTU1398	11.688	-2.06249	0.667666	-3.08911	0.00200755	0.00639058	unidentified	unidentified	unidentified	unidentified	unidentified	uncultured fungus
New.ReferenceOTU2496	1.23293	3.55468	1.15799	3.0697	0.00214274	0.00679384	Ascomycota	Dothideomycetes	Capnodiales	Incertae sedis	Phaeotheca	Phaeotheca triangularis
New.ReferenceOTU1217	3.81272	-1.48618	0.484423	-3.06793	0.00215544	0.0068071	Ascomycota	Dothideomycetes	Dothideales	Dothideaceae	Endoconidioma	Endoconidioma populi
New.ReferenceOTU752	3.11965	1.50456	0.491495	3.06119	0.00220457	0.00693486	Ascomycota	unidentified	unidentified	unidentified	unidentified	Ascomycota sp
New.ReferenceOTU513	2.74298	-2.55406	0.841349	-3.03567	0.00240001	0.00752004	Basidiomycota	Tremellomycetes	Tremellales	unidentified	unidentified	Tremellales sp PNB099A
New.ReferenceOTU497	4.74416	2.09777	0.692765	3.02812	0.00246084	0.00768051	Ascomycota	Dothideomycetes	Pleosporales	Pleosporaceae	Stemphylium	Stemphylium loti
New.ReferenceOTU1328	11.5852	-1.28586	0.425068	-3.02506	0.00248585	0.00772837	Ascomycota	Dothideomycetes	Dothideales	Dothideaceae	Endoconidioma	Endoconidioma populi
New.ReferenceOTU742	8.15808	-3.17801	1.05205	-3.02077	0.00252135	0.00780836	unidentified	unidentified	unidentified	unidentified	unidentified	uncultured fungus
New.ReferenceOTU1014	1.37835	-2.49565	0.828913	-3.01075	0.00260605	0.00803951	Ascomycota	Dothideomycetes	Dothideales	Dothideaceae	Endoconidioma	Endoconidioma populi
New.ReferenceOTU1540	1.43073	2.72029	0.904894	3.0062	0.00264538	0.00812946	Ascomycota	Sordariomycetes	Trichosphaeriales	Incertae sedis	unidentified	Trichosphaeriales sp
New.ReferenceOTU424	7.29762	-2.52878	0.843402	-2.99831	0.00271485	0.00831097	Ascomycota	Incertae sedis	Incertae sedis	Incertae sedis	Knufia	Knufia sp
New.ReferenceOTU1112	1.64509	2.32458	0.777916	2.98822	0.00280608	0.00855748	unidentified	unidentified	unidentified	unidentified	unidentified	Fungi sp
New.ReferenceOTU1890	4.11343	1.59227	0.534078	2.98134	0.00286988	0.00871876	Ascomycota	Dothideomycetes	Pleosporales	Sporormiaceae	unidentified	Sporormiaceae sp
New.ReferenceOTU470	2.21928	2.0011	0.674941	2.96486	0.00302823	0.00916497	Basidiomycota	unidentified	unidentified	unidentified	unidentified	Basidiomycota sp
New.ReferenceOTU1518	8.11409	-1.10197	0.372019	-2.96212	0.00305526	0.00921191	Ascomycota	Dothideomycetes	Capnodiales	Davidiellaceae	Cladosporium	Cladosporium exasperatum
New.ReferenceOTU1235	4.60475	-2.29948	0.785973	-2.92565	0.00343742	0.0102865	Ascomycota	Eurotiomycetes	Onygenales	Ajellomycetaceae	Ajellomyces	Ajellomyces capsulatus
New.ReferenceOTU2121	2.4816	-2.69762	0.921747	-2.92663	0.00342652	0.0102865	Basidiomycota	Tremellomycetes	Tremellales	unidentified	unidentified	uncultured Tremellales
New.ReferenceOTU1055	61.9002	1.06953	0.366187	2.92071	0.00349233	0.0104118	Ascomycota	Leotiomycetes	Helotiales	Sclerotiniaceae	Botryotinia	Botryotinia fuckeliana
New.ReferenceOTU617	3.30977	-3.27604	1.12555	-2.91062	0.0036071	0.0107135	Ascomycota	unidentified	unidentified	unidentified	unidentified	Ascomycota sp
New.ReferenceOTU2488	9.37776	1.8879	0.648879	2.90948	0.00362034	0.0107135	Basidiomycota	Tremellomycetes	Tremellales	Incertae sedis	Cryptococcus	Cryptococcus laurentii
New.ReferenceOTU1951	2.26922	2.66217	0.918844	2.8973	0.00376393	0.0110973	Ascomycota	Dothideomycetes	Pleosporales	Pleosporaceae	Pyrenophora	Pyrenophora lolii
New.ReferenceOTU57	34.037	-1.08738	0.375471	-2.89603	0.0037791	0.0111011	Ascomycota	Dothideomycetes	Capnodiales	Davidiellaceae	Cladosporium	Cladosporium exasperatum
New.ReferenceOTU1416	1.25225	3.5344	1.22414	2.88726	0.00388619	0.0113739	Ascomycota	Dothideomycetes	Capnodiales	Davidiellaceae	Cladosporium	Cladosporium exasperatum
New.ReferenceOTU727	38.0933	1.22067	0.42346	2.88262	0.00394378	0.0114685	Basidiomycota	Ustilaginomycetes	Ustilaginales	Ustilaginaceae	unidentified	Ustilaginaceae sp
New.ReferenceOTU1152	1.53914	-2.50004	0.867362	-2.88235	0.00394724	0.0114685	Basidiomycota	Agaricostilbomycetes	Agaricostilbales	Agaricostilbaceae	Bensingtonia	Bensingtonia miscanthi
New.ReferenceOTU1194	7.23186	1.38954	0.483156	2.87597	0.0040279	0.0116605	Basidiomycota	Ustilaginomycetes	Ustilaginales	Ustilaginaceae	Ustilago	Ustilago maydis
New.ReferenceOTU856	2.34325	2.01611	0.704268	2.8627	0.00420041	0.012116	Ascomycota	unidentified	unidentified	unidentified	unidentified	Ascomycota sp
New.ReferenceOTU2499	50.0689	1.27786	0.447306	2.85679	0.00427948	0.0122997	Ascomycota	unidentified	unidentified	unidentified	unidentified	Ascomycota sp
New.ReferenceOTU1799	10.3067	1.03946	0.364906	2.84857	0.00439165	0.0125768	unidentified	unidentified	unidentified	unidentified	unidentified	fungal sp TRN256
New.ReferenceOTU275	3.56968	-1.55899	0.548291	-2.84336	0.00446406	0.0127385	Ascomycota	Dothideomycetes	Dothideales	Dothideaceae	Endoconidioma	Endoconidioma populi
New.ReferenceOTU931	1.11806	-3.41221	1.20681	-2.82746	0.00469191	0.0133411	Ascomycota	Dothideomycetes	Capnodiales	Mycosphaerellaceae	Septoria	cf Septoria sp CBS 134910
New.ReferenceOTU272	1.36964	-3.9225	1.39035	-2.82124	0.00478386	0.0135543	Ascomycota	Dothideomycetes	Incertae sedis	Incertae sedis	Bactrodesmium	Bactrodesmium gabretae
New.ReferenceOTU218	17.5866	1.16739	0.415891	2.80697	0.005001	0.0141194	Ascomycota	Sordariomycetes	unidentified	unidentified	unidentified	Sordariomycetes sp
New.ReferenceOTU221	7.33923	-1.1547	0.411561	-2.80567	0.00502126	0.0141267	unidentified	unidentified	unidentified	unidentified	unidentified	fungal sp TRN499
New.ReferenceOTU401	84.6905	-1.93668	0.698324	-2.77332	0.00554879	0.0155561	Ascomycota	Eurotiomycetes	Chaetothyriales	Herpotrichiellaceae	unidentified	uncultured Herpotrichiellaceae
New.ReferenceOTU1137	1.72405	1.95825	0.707573	2.76756	0.00564784	0.0157784	Ascomycota	Dothideomycetes	Pleosporales	Incertae sedis	Phoma	Phoma sp
New.ReferenceOTU2293	1.64715	-2.95912	1.07033	-2.76467	0.00569804	0.0158632	Ascomycota	Incertae sedis	Incertae sedis	Incertae sedis	Liberomyces	Liberomyces sp
New.ReferenceOTU250	1.27672	-3.62093	1.31637	-2.7507	0.00594684	0.0164983	Ascomycota	Eurotiomycetes	Chaetothyriales	unidentified	unidentified	Chaetothyriales sp
New.ReferenceOTU2258	9.94961	1.0965	0.400251	2.73952	0.00615285	0.0170108	Ascomycota	Dothideomycetes	Pleosporales	Lophiostomataceae	Lophiostoma	Lophiostoma arundinis
New.ReferenceOTU1161	1.16084	-3.31615	1.21183	-2.73648	0.00621002	0.0171097	Ascomycota	Dothideomycetes	Capnodiales	Davidiellaceae	Cladosporium	Cladosporium pseudiridis
New.ReferenceOTU1119	1.84384	-1.78609	0.658503	-2.71235	0.00668082	0.0182807	Ascomycota	Dothideomycetes	Dothideales	Dothideaceae	Endoconidioma	Endoconidioma populi
New.ReferenceOTU532	1.05933	2.18857	0.806747	2.71283	0.0066712	0.0182807	Ascomycota	Sordariomycetes	Sordariales	unidentified	unidentified	Sordariales sp
New.ReferenceOTU1423	0.814673	2.45421	0.90636	2.70776	0.00677381	0.0184719	Basidiomycota	Tremellomycetes	Tremellales	Incertae sedis	Cryptococcus	Cryptococcus oeirensis
New.ReferenceOTU410	7.75393	-3.19922	1.1828	-2.7048	0.00683463	0.0185363	Ascomycota	Lecanoromycetes	Candelariales	Candelariaceae	Candelaria	Candelaria pacifica
New.ReferenceOTU2162	12.7311	-1.93674	0.716156	-2.70435	0.00684381	0.0185363	unidentified	unidentified	unidentified	unidentified	unidentified	Fungi sp
New.ReferenceOTU53	1.39173	-3.91955	1.45436	-2.69505	0.00703791	0.0189336	Ascomycota	Eurotiomycetes	Chaetothyriales	unidentified	unidentified	Chaetothyriales sp
New.ReferenceOTU1737	2.60863	-2.43621	0.903952	-2.69506	0.00703757	0.0189336	Ascomycota	Dothideomycetes	unidentified	unidentified	unidentified	Dothideomycetes sp
New.ReferenceOTU253	96.879	-1.77045	0.660416	-2.6808	0.00734461	0.0195045	Ascomycota	Dothideomycetes	unidentified	unidentified	unidentified	Dothideomycetes sp
New.ReferenceOTU244	4.20434	-2.60705	0.97254	-2.68066	0.00734777	0.0195045	Ascomycota	Sordariomycetes	Xylariales	Diatrypaceae	Eutypella	Eutypella sp MS_2011_F20
New.ReferenceOTU302	1.68694	-2.93195	1.09255	-2.68358	0.0072838	0.0195045	Ascomycota	Lecanoromycetes	Lecanorales	Incertae sedis	Scoliciosporum	Scoliciosporum umbrinum
New.ReferenceOTU460	3.53274	1.71389	0.639179	2.6814	0.00733155	0.0195045	Ascomycota	Sordariomycetes	Hypocreales	Incertae sedis	Sarocladium	Sarocladium zeae
New.ReferenceOTU1312	2.12686	1.84553	0.693101	2.66272	0.00775124	0.0205074	Basidiomycota	Agaricomycetes	Boletales	Suillaceae	Suillus	Suillus pseudobrevipes
New.ReferenceOTU1124	4.97502	-2.18316	0.822592	-2.654	0.00795438	0.0209754	Ascomycota	Eurotiomycetes	Chaetothyriales	Herpotrichiellaceae	Capronia	Capronia sp 94006a
New.ReferenceOTU1390	10.067	-2.36039	0.894006	-2.64023	0.00828487	0.021775	Ascomycota	Dothideomycetes	unidentified	unidentified	unidentified	Dothideomycetes sp
New.ReferenceOTU293	1.43905	-3.39328	1.28745	-2.63565	0.0083976	0.0218677	unidentified	unidentified	unidentified	unidentified	unidentified	fungal sp TRN254
New.ReferenceOTU527	1.33412	3.34588	1.26939	2.63582	0.00839348	0.0218677	Ascomycota	Lecanoromycetes	unidentified	unidentified	unidentified	Lecanoromycetes sp
New.ReferenceOTU2080	1.86423	2.07616	0.787777	2.63546	0.00840222	0.0218677	Basidiomycota	Ustilaginomycetes	Ustilaginales	Ustilaginaceae	Ustilago	Ustilago echinata
New.ReferenceOTU587	12.0288	1.97245	0.750126	2.62949	0.00855135	0.022175	Ascomycota	Dothideomycetes	Pleosporales	Pleosporaceae	Pyrenophora	Pyrenophora bromi
New.ReferenceOTU11	1.31348	3.08324	1.173	2.62852	0.0085758	0.022175	Ascomycota	Lecanoromycetes	Lecanorales	Parmeliaceae	Usnea	Usnea sp F206
New.ReferenceOTU20	5.86071	2.64238	1.00616	2.62621	0.00863425	0.0222541	Ascomycota	Dothideomycetes	unidentified	unidentified	unidentified	dothideomycete sp 7683
New.ReferenceOTU1712	1.54443	-3.86216	1.47658	-2.6156	0.00890699	0.0228832	Basidiomycota	Exobasidiomycetes	Exobasidiales	Exobasidiaceae	Exobasidium	Exobasidium yoshinagae
New.ReferenceOTU2030	4.67136	-1.21844	0.468162	-2.60261	0.00925177	0.0236928	Ascomycota	Dothideomycetes	unidentified	unidentified	unidentified	Dothideomycetes sp
New.ReferenceOTU1182	3.43256	-2.49906	0.961008	-2.60045	0.00931005	0.0237659	Ascomycota	Lecanoromycetes	Teloschistales	Physciaceae	Physcia	Physcia tribacia
New.ReferenceOTU1463	1.51616	2.68924	1.03625	2.59515	0.00945489	0.0240588	Ascomycota	Dothideomycetes	unidentified	unidentified	unidentified	Dothideomycetes sp
New.ReferenceOTU601	2.29937	-4.64281	1.7924	-2.59028	0.00958981	0.0243246	Ascomycota	Incertae sedis	Incertae sedis	Incertae sedis	Knufia	Knufia sp
New.ReferenceOTU1002	18.1207	1.35715	0.524269	2.58865	0.0096352	0.0243624	Basidiomycota	Tremellomycetes	Cystofilobasidiales	Cystofilobasidiaceae	Udeniomyces	Udeniomyces pyricola
New.ReferenceOTU1015	10.8274	0.778456	0.301081	2.58554	0.00972279	0.0245063	Ascomycota	Dothideomycetes	Pleosporales	Incertae sedis	Periconia	Periconia sp
New.ReferenceOTU1307	1.60496	-2.12031	0.820799	-2.58322	0.00978818	0.0245936	unidentified	unidentified	unidentified	unidentified	unidentified	uncultured fungus
New.ReferenceOTU616	3.75233	-3.07085	1.19432	-2.5712	0.0101346	0.0253452	Ascomycota	Leotiomycetes	Helotiales	Dermateaceae	Pezicula	Pezicula sp 3 ICMP 18931
New.ReferenceOTU1159	0.945977	2.16665	0.842842	2.57065	0.0101508	0.0253452	Ascomycota	Dothideomycetes	Pleosporales	Incertae sedis	Didymella	Didymella sp
New.ReferenceOTU706	1.41332	3.52237	1.37931	2.55372	0.010658	0.0265287	Ascomycota	Dothideomycetes	Myriangiales	Myriangiaceae	Myriangium	Myriangium sp UFMG_BRO197
New.ReferenceOTU1444	4.35774	-2.01751	0.790969	-2.55069	0.0107511	0.0266774	Ascomycota	Sordariomycetes	Xylariales	Diatrypaceae	Diatrypella	Diatrypella sp
New.ReferenceOTU831	6.71224	2.05774	0.808549	2.54498	0.0109286	0.0270338	Ascomycota	Dothideomycetes	Dothideales	Dothioraceae	Aureobasidium	Aureobasidium pullulans
New.ReferenceOTU1318	15.1573	1.56729	0.616609	2.54179	0.0110286	0.0271971	Basidiomycota	Tremellomycetes	Tremellales	Incertae sedis	Cryptococcus	Cryptococcus heimaeyensis
New.ReferenceOTU92	2.42728	-1.7003	0.674822	-2.51962	0.0117481	0.0288822	Ascomycota	Dothideomycetes	Capnodiales	Davidiellaceae	Cladosporium	Cladosporium fusiforme
New.ReferenceOTU836	2.5136	-1.91441	0.76623	-2.49848	0.0124727	0.0305695	Basidiomycota	Tremellomycetes	Tremellales	Incertae sedis	Cryptococcus	Cryptococcus dimennae
New.ReferenceOTU2114	2.44355	2.25218	0.902124	2.49653	0.0125415	0.0306443	Ascomycota	Dothideomycetes	Pleosporales	unidentified	unidentified	Pleosporales sp
New.ReferenceOTU73	0.840214	2.84942	1.14263	2.49373	0.012641	0.0307931	Basidiomycota	Agaricomycetes	Agaricales	Psathyrellaceae	unidentified	Psathyrellaceae sp
New.ReferenceOTU1371	4.39687	-1.49853	0.604296	-2.4798	0.0131456	0.0319251	Ascomycota	unidentified	unidentified	unidentified	unidentified	uncultured Pezizomycotina
New.ReferenceOTU183	3.59002	-2.82415	1.14767	-2.46077	0.0138638	0.0335673	Ascomycota	Dothideomycetes	Pleosporales	unidentified	unidentified	Pleosporales sp
New.ReferenceOTU16	1.61786	-3.05846	1.24623	-2.45418	0.0141208	0.0340861	Ascomycota	unidentified	unidentified	unidentified	unidentified	Ascomycota sp
New.ReferenceOTU2315	12.5537	1.03589	0.422381	2.45249	0.0141871	0.0341429	Ascomycota	Leotiomycetes	Helotiales	Incertae sedis	Glarea	Glarea lozoyensis
New.ReferenceOTU2278	2.87789	1.76304	0.721048	2.4451	0.0144811	0.0347459	Basidiomycota	unidentified	unidentified	unidentified	unidentified	Basidiomycota sp
New.ReferenceOTU824	9.17167	1.46451	0.599443	2.44312	0.014561	0.0348332	Basidiomycota	Agaricomycetes	Agaricales	unidentified	unidentified	Agaricales sp
New.ReferenceOTU1136	1.06276	-2.28482	0.939321	-2.43241	0.0149987	0.0357729	Ascomycota	Dothideomycetes	Botryosphaeriales	Botryosphaeriaceae	Lasiodiplodia	Lasiodiplodia rubropurpurea
New.ReferenceOTU1393	2.85756	-2.12797	0.880077	-2.41793	0.015609	0.0371179	Ascomycota	Dothideomycetes	Capnodiales	Mycosphaerellaceae	Septoria	Septoria cretae
New.ReferenceOTU567	6.15092	2.5222	1.05061	2.40071	0.0163634	0.0387962	Ascomycota	Dothideomycetes	Pleosporales	unidentified	unidentified	Pleosporales sp
New.ReferenceOTU1008	2.6738	-1.62231	0.676578	-2.39782	0.0164931	0.0389882	Ascomycota	unidentified	unidentified	unidentified	unidentified	Ascomycota sp
New.ReferenceOTU1294	2.47535	-2.6345	1.10077	-2.39333	0.0166963	0.0393519	Basidiomycota	Tremellomycetes	Tremellales	unidentified	unidentified	Tremellales sp
New.ReferenceOTU362	1.32908	-3.85259	1.61103	-2.39138	0.0167853	0.0394455	Ascomycota	unidentified	unidentified	unidentified	unidentified	Ascomycota sp
New.ReferenceOTU1595	1.1857	-2.06179	0.864417	-2.38518	0.0170708	0.0399987	Basidiomycota	Agaricomycetes	Agaricales	Psathyrellaceae	Coprinellus	Coprinellus micaceus
New.ReferenceOTU1745	1.06612	-2.69919	1.13732	-2.37329	0.0176303	0.041189	Basidiomycota	Tremellomycetes	Tremellales	Incertae sedis	Dioszegia	Dioszegia zsoltii var. yunnanensis
New.ReferenceOTU945	6.24468	1.27578	0.539853	2.36319	0.0181183	0.0422057	Basidiomycota	Ustilaginomycetes	Ustilaginales	Ustilaginaceae	Ustilago	Ustilago filiformis
New.ReferenceOTU2019	24.878	-0.99894	0.424872	-2.35115	0.0187154	0.0433438	Ascomycota	Dothideomycetes	Pleosporales	Leptosphaeriaceae	Coniothyrium	Coniothyrium carteri
New.ReferenceOTU2348	1.06002	2.7144	1.1545	2.35115	0.0187154	0.0433438	unidentified	unidentified	unidentified	unidentified	unidentified	uncultured fungus
New.ReferenceOTU1198	5.84407	-0.989617	0.42171	-2.34667	0.0189418	0.0437413	Ascomycota	Dothideomycetes	Dothideales	Dothideaceae	Endoconidioma	Endoconidioma populi
New.ReferenceOTU2482	3.18982	2.60807	1.11336	2.34253	0.0191535	0.0441028	Ascomycota	Dothideomycetes	Pleosporales	Pleosporaceae	Bipolaris	Bipolaris brizae
New.ReferenceOTU1768	0.900536	-1.82048	0.779222	-2.33628	0.0194767	0.0447181	Ascomycota	Dothideomycetes	Dothideales	Dothideaceae	Endoconidioma	Endoconidioma populi
New.ReferenceOTU560	2.5891	-3.35083	1.44024	-2.32658	0.0199878	0.04576	Basidiomycota	Tremellomycetes	Tremellales	Incertae sedis	Bullera	Bullera dendrophila
New.ReferenceOTU1146	3.27946	1.49358	0.643492	2.32106	0.0202836	0.0463045	Ascomycota	Sordariomycetes	Xylariales	Amphisphaeriaceae	unidentified	Amphisphaeriaceae sp
New.ReferenceOTU1602	1.46027	3.28602	1.41897	2.31578	0.0205705	0.0468258	Ascomycota	Dothideomycetes	Pleosporales	Pleosporaceae	Pyrenophora	Pyrenophora graminea
New.ReferenceOTU2044	1.11541	-3.44446	1.49551	-2.3032	0.0212677	0.0482753	Ascomycota	Eurotiomycetes	Pyrenulales	Massariaceae	Massaria	Massaria pyri
New.ReferenceOTU227	2.03582	1.44816	0.630183	2.298	0.0215618	0.0488043	Ascomycota	Dothideomycetes	Capnodiales	Mycosphaerellaceae	unidentified	Mycosphaerellaceae sp
New.ReferenceOTU1847	126.264	1.32883	0.579497	2.29308	0.0218437	0.0493025	Ascomycota	Dothideomycetes	Pleosporales	Sporormiaceae	unidentified	Sporormiaceae sp
New.ReferenceOTU2046	2.37116	-2.2879	1.00064	-2.28643	0.0222291	0.0500311	Ascomycota	Eurotiomycetes	Chaetothyriales	Herpotrichiellaceae	unidentified	Herpotrichiellaceae sp
New.ReferenceOTU1249	1.59625	-3.77804	1.66129	-2.27417	0.022956	0.0515221	Ascomycota	unidentified	unidentified	unidentified	unidentified	uncultured Ascomycota
New.ReferenceOTU2143	18.4742	-0.851206	0.37706	-2.25748	0.0239778	0.0536646	Ascomycota	Dothideomycetes	Dothideales	Dothideaceae	Endoconidioma	Endoconidioma populi
New.ReferenceOTU923	0.969602	2.22206	0.986688	2.25204	0.0243195	0.0540114	Ascomycota	Sordariomycetes	Coniochaetales	unidentified	unidentified	Coniochaetales sp
New.ReferenceOTU928	5.51256	-1.32889	0.589984	-2.25242	0.0242956	0.0540114	Ascomycota	Dothideomycetes	Capnodiales	Teratosphaeriaceae	unidentified	Teratosphaeriaceae sp
New.ReferenceOTU1305	8.41327	-2.92068	1.29705	-2.25179	0.0243356	0.0540114	Ascomycota	unidentified	unidentified	unidentified	unidentified	uncultured Ascomycota
New.ReferenceOTU1741	1.38727	3.33531	1.48574	2.24488	0.0247756	0.0548357	Ascomycota	Dothideomycetes	unidentified	unidentified	unidentified	Dothideomycetes sp
New.ReferenceOTU2329	2.01667	1.8899	0.842469	2.24329	0.0248781	0.0548518	Ascomycota	Eurotiomycetes	Eurotiales	Trichocomaceae	Penicillium	Penicillium sp HK80
New.ReferenceOTU1625	1.32166	2.51875	1.12312	2.24264	0.0249202	0.0548518	unidentified	unidentified	unidentified	unidentified	unidentified	uncultured fungus
New.ReferenceOTU1477	3.02001	-1.71816	0.7684	-2.23602	0.0253502	0.0556451	Ascomycota	Lecanoromycetes	Lecanorales	Incertae sedis	Scoliciosporum	Scoliciosporum chlorococcum
New.ReferenceOTU71	2.88514	2.34484	1.04929	2.23469	0.0254379	0.0556847	Ascomycota	Dothideomycetes	Hysteriales	Hysteriaceae	Hysterium	Hysterium pulicare
New.ReferenceOTU2333	1.90686	1.55858	0.698374	2.23173	0.0256331	0.0559586	Ascomycota	Dothideomycetes	Pleosporales	Cucurbitariaceae	Curreya	Curreya austroafricana
New.ReferenceOTU2307	2.13805	1.8166	0.815872	2.22657	0.0259759	0.0565524	Ascomycota	Dothideomycetes	Pleosporales	Pleosporaceae	Embellisia	Embellisia planifunda
New.ReferenceOTU1093	3.27362	1.75661	0.790625	2.2218	0.0262966	0.0570951	Ascomycota	Dothideomycetes	Pleosporales	unidentified	unidentified	Pleosporales sp
New.ReferenceOTU1942	2.00566	-3.05989	1.3781	-2.22037	0.0263938	0.0571507	Ascomycota	Incertae sedis	Incertae sedis	Incertae sedis	Xenobotrytis	Xenobotrytis acaducospora
New.ReferenceOTU1409	5.92166	-1.70236	0.769979	-2.21092	0.0270416	0.0583953	Ascomycota	Dothideomycetes	Capnodiales	unidentified	unidentified	Capnodiales sp
New.ReferenceOTU1744	1.19741	-2.89228	1.31063	-2.20679	0.0273287	0.0588561	Ascomycota	Dothideomycetes	Capnodiales	Capnodiaceae	Capnodium	Capnodium coffeae
New.ReferenceOTU1752	2.1946	1.55064	0.703499	2.20418	0.0275118	0.0590911	Ascomycota	Dothideomycetes	Pleosporales	Pleosporaceae	Lewia	Lewia infectoria
New.ReferenceOTU368	0.894033	2.42657	1.10201	2.20196	0.0276684	0.0592681	Ascomycota	Sordariomycetes	Hypocreales	Incertae sedis	Acremonium	Acremonium alternatum
New.ReferenceOTU1087	2.24869	-3.25983	1.48238	-2.19906	0.027874	0.0593902	Ascomycota	Dothideomycetes	Dothideales	Dothioraceae	Aureobasidium	Aureobasidium pullulans
New.ReferenceOTU121	2.91712	-1.82336	0.829037	-2.19938	0.0278512	0.0593902	Ascomycota	unidentified	unidentified	unidentified	unidentified	melanized limestone ascomycete CR_2004
New.ReferenceOTU332	1.77357	1.80832	0.823781	2.19514	0.0281532	0.0598256	unidentified	unidentified	unidentified	unidentified	unidentified	fungal endophyte
New.ReferenceOTU1036	2.82003	-2.49959	1.13988	-2.19285	0.0283181	0.0600164	Basidiomycota	Tremellomycetes	unidentified	unidentified	unidentified	uncultured Cryptococcus
New.ReferenceOTU1143	5.17301	1.37043	0.625682	2.1903	0.0285022	0.0602467	Ascomycota	unidentified	unidentified	unidentified	unidentified	Ascomycota sp
New.ReferenceOTU1455	3.8463	-1.30457	0.595912	-2.1892	0.0285827	0.0602574	Ascomycota	Lecanoromycetes	Ostropales	Stictidaceae	unidentified	Stictidaceae sp
New.ReferenceOTU1279	17.8142	-1.21933	0.557675	-2.18645	0.0287827	0.0605194	Ascomycota	Sordariomycetes	Incertae sedis	Incertae sedis	Cryptovalsa	Cryptovalsa ampelina
New.ReferenceOTU1852	2.77564	1.65677	0.758681	2.18375	0.0289804	0.0607752	Ascomycota	Dothideomycetes	unidentified	unidentified	unidentified	Dothideomycetes sp
New.ReferenceOTU1202	9.93957	1.01742	0.466479	2.18107	0.0291782	0.0610298	unidentified	unidentified	unidentified	unidentified	unidentified	uncultured fungus
New.ReferenceOTU1606	0.683863	-2.52201	1.15995	-2.17424	0.029687	0.0619318	Ascomycota	Dothideomycetes	Dothideales	Dothideaceae	Dothidea	Dothidea sp CanS_64
New.ReferenceOTU2223	0.890881	2.74034	1.26292	2.16986	0.0300178	0.0624589	Ascomycota	Eurotiomycetes	Chaetothyriales	Herpotrichiellaceae	Exophiala	Exophiala xenobiotica
New.ReferenceOTU632	1.38282	-2.85036	1.3195	-2.16019	0.0307582	0.0638332	Ascomycota	Dothideomycetes	Capnodiales	Mycosphaerellaceae	Mycosphaerella	Mycosphaerella sp MUCC573
New.ReferenceOTU1212	44.7346	-1.19919	0.555638	-2.15823	0.0309102	0.0639825	Ascomycota	Dothideomycetes	Dothideales	unidentified	unidentified	Dothideales sp
New.ReferenceOTU115	2.89498	-1.69126	0.786325	-2.15084	0.0314887	0.0650115	Basidiomycota	Microbotryomycetes	Sporidiobolales	Incertae sedis	Sporobolomyces	Sporobolomyces gracilis
New.ReferenceOTU2421	30.3359	-1.09649	0.510087	-2.14961	0.0315863	0.065045	Ascomycota	Dothideomycetes	Capnodiales	Teratosphaeriaceae	unidentified	Teratosphaeriaceae sp
New.ReferenceOTU1079	22.8099	0.99226	0.461876	2.14833	0.0316878	0.0650863	unidentified	unidentified	unidentified	unidentified	unidentified	Fungi sp
New.ReferenceOTU1051	1.21639	-2.27444	1.07262	-2.12046	0.0339675	0.0695897	Ascomycota	Dothideomycetes	Capnodiales	unidentified	unidentified	Capnodiales sp
New.ReferenceOTU476	2.10268	-4.31696	2.04174	-2.11435	0.0344852	0.0704698	Ascomycota	unidentified	unidentified	unidentified	unidentified	uncultured Pezizomycotina
New.ReferenceOTU2238	0.82831	-2.74238	1.2992	-2.11082	0.0347877	0.0709065	Ascomycota	Lecanoromycetes	Ostropales	Stictidaceae	unidentified	Stictidaceae sp
New.ReferenceOTU1735	3.36153	1.69239	0.802719	2.10832	0.0350032	0.0711643	Basidiomycota	Agaricomycetes	Agaricales	Psathyrellaceae	Coprinellus	Coprinellus curtus
New.ReferenceOTU158	5.08365	-2.03796	0.969312	-2.10248	0.0355111	0.0718747	Ascomycota	Dothideomycetes	Dothideales	Dothioraceae	Sydowia	Sydowia japonica
New.ReferenceOTU226	3.71882	1.74458	0.830274	2.10121	0.0356225	0.0718747	Ascomycota	Dothideomycetes	Pleosporales	unidentified	unidentified	Pleosporales sp
New.ReferenceOTU1717	1.63121	2.7488	1.30802	2.1015	0.0355975	0.0718747	Ascomycota	Dothideomycetes	Pleosporales	Phaeosphaeriaceae	Phaeosphaeria	Phaeosphaeria padellana
New.ReferenceOTU637	1.00217	-1.48588	0.712526	-2.08536	0.0370364	0.0745392	Ascomycota	Dothideomycetes	Capnodiales	unidentified	unidentified	Capnodiales sp
New.ReferenceOTU1063	1.34684	1.65209	0.799074	2.0675	0.0386869	0.0776654	Basidiomycota	Tremellomycetes	Tremellales	Incertae sedis	Cryptococcus	Cryptococcus adeliensis
New.CleanUp.ReferenceOTU203	1.22693	-3.38298	1.64138	-2.06106	0.0392977	0.078694	Ascomycota	Dothideomycetes	Pleosporales	unidentified	unidentified	Pleosporales sp
New.ReferenceOTU1781	7.91326	-1.76328	0.859093	-2.05249	0.0401221	0.0801438	unidentified	unidentified	unidentified	unidentified	unidentified	uncultured fungus
New.ReferenceOTU151	8.53024	-0.938989	0.458112	-2.0497	0.0403942	0.0804861	Ascomycota	Dothideomycetes	Capnodiales	Davidiellaceae	Cladosporium	Cladosporium exasperatum
New.ReferenceOTU213	6.02234	1.358	0.663748	2.04596	0.0407607	0.0809867	Basidiomycota	Agaricomycetes	Polyporales	Ganodermataceae	Ganoderma	Ganoderma australe
New.ReferenceOTU1043	1.18155	1.99061	0.973371	2.04507	0.0408481	0.0809867	Ascomycota	unidentified	unidentified	unidentified	unidentified	Ascomycota sp
New.ReferenceOTU2452	6.64975	-1.49467	0.732528	-2.04042	0.0413084	0.0816966	Ascomycota	Dothideomycetes	Pleosporales	unidentified	unidentified	Pleosporales sp
New.ReferenceOTU1722	7.34244	-1.42124	0.700133	-2.02996	0.0423608	0.0835711	unidentified	unidentified	unidentified	unidentified	unidentified	uncultured fungus
New.ReferenceOTU2408	63.1813	0.821255	0.40554	2.02509	0.0428582	0.0843441	Ascomycota	unidentified	unidentified	unidentified	unidentified	ascomycete sp MA 4907
New.ReferenceOTU2389	1.79588	-2.02994	1.00465	-2.02055	0.0433267	0.0850565	Ascomycota	Dothideomycetes	Capnodiales	Incertae sedis	Meristemomyces	Meristemomyces frigidus
New.ReferenceOTU2506	6.9776	-0.933088	0.462671	-2.01674	0.0437223	0.0852371	Ascomycota	Dothideomycetes	Capnodiales	Incertae sedis	Toxicocladosporium	Toxicocladosporium banksiae
New.ReferenceOTU2326	0.98765	2.7506	1.36399	2.01659	0.0437387	0.0852371	Ascomycota	Sordariomycetes	unidentified	unidentified	unidentified	Sordariomycetes sp
New.ReferenceOTU778	3.54191	-1.68268	0.834391	-2.01665	0.0437316	0.0852371	Ascomycota	Sordariomycetes	Xylariales	unidentified	unidentified	Xylariales sp
New.ReferenceOTU894	1.03947	1.96077	0.97384	2.01344	0.0440684	0.0856708	Basidiomycota	Agaricomycetes	Agaricales	unidentified	unidentified	Agaricales sp
New.ReferenceOTU1290	14.5046	-0.710138	0.353376	-2.00958	0.0444755	0.0862523	Ascomycota	Dothideomycetes	Capnodiales	Davidiellaceae	Cladosporium	Cladosporium exasperatum
New.ReferenceOTU1545	8.73659	-1.61445	0.805556	-2.00414	0.0450546	0.0871637	Ascomycota	Dothideomycetes	Pleosporales	Pleosporaceae	Bipolaris	Bipolaris melinidis
New.ReferenceOTU1301	1.45778	-2.24463	1.12315	-1.99851	0.0456619	0.0877574	Ascomycota	Dothideomycetes	unidentified	unidentified	unidentified	Dothideomycetes sp
New.ReferenceOTU2108	1.8676	-2.52906	1.26477	-1.99961	0.0455423	0.0877574	Ascomycota	Dothideomycetes	Dothideales	Dothioraceae	Pringsheimia	Pringsheimia sp
New.ReferenceOTU247	0.874206	-2.6711	1.33673	-1.99824	0.0456909	0.0877574	Ascomycota	Taphrinomycetes	Taphrinales	Taphrinaceae	unidentified	Taphrinaceae sp
New.ReferenceOTU857	31.5503	-1.31843	0.661289	-1.99372	0.0461823	0.0884884	Ascomycota	Dothideomycetes	Dothideales	unidentified	unidentified	Dothideales sp
New.ReferenceOTU1429	3.81902	1.07925	0.541681	1.9924	0.0463267	0.0885527	Basidiomycota	Agaricomycetes	Polyporales	Ganodermataceae	Ganoderma	Ganoderma resinaceum
New.ReferenceOTU1902	2.33484	-3.28524	1.6537	-1.9866	0.046967	0.0895623	Ascomycota	Lecanoromycetes	unidentified	unidentified	unidentified	Lecanoromycetes sp
New.ReferenceOTU274	4.75121	-1.12468	0.570858	-1.97016	0.0488203	0.0928747	Ascomycota	Eurotiomycetes	Mycocaliciales	Mycocaliciaceae	Chaenothecopsis	Chaenothecopsis pusilla
New.ReferenceOTU990	4.45141	-2.49059	1.27109	-1.95941	0.0500646	0.0950156	Ascomycota	Eurotiomycetes	Chaetothyriales	Herpotrichiellaceae	Exophiala	Exophiala sp
New.ReferenceOTU169	2.98878	-3.17573	1.62248	-1.95733	0.0503088	0.0952529	Ascomycota	Dothideomycetes	Capnodiales	Mycosphaerellaceae	Phaeothecoidea	Phaeothecoidea melaleuca
New.ReferenceOTU240	7.71227	1.1318	0.579654	1.95255	0.0508733	0.096094	Ascomycota	Dothideomycetes	Pleosporales	Cucurbitariaceae	Pyrenochaetopsis	Pyrenochaetopsis sp
New.ReferenceOTU710	4.43789	-1.65473	0.848268	-1.95071	0.051091	0.0962777	Ascomycota	Dothideomycetes	Capnodiales	unidentified	unidentified	Capnodiales sp M_Camp7
New.ReferenceOTU1207	4.22858	-1.03269	0.531791	-1.94192	0.0521471	0.0980366	Ascomycota	Dothideomycetes	Dothideales	Dothioraceae	Aureobasidium	Aureobasidium pullulans
New.ReferenceOTU1701	8.46035	1.56001	0.804478	1.93915	0.0524825	0.0984354	Ascomycota	unidentified	unidentified	unidentified	unidentified	ascomycete sp MA 4921
New.ReferenceOTU1571	1.32207	-2.58647	1.33487	-1.93762	0.0526697	0.0985552	Ascomycota	Dothideomycetes	Myriangiales	unidentified	unidentified	Myriangiales sp
New.ReferenceOTU708	2.81347	-1.62569	0.84003	-1.93528	0.0529558	0.0988591	Ascomycota	Dothideomycetes	unidentified	unidentified	unidentified	Dothideomycetes sp
New.ReferenceOTU381	2.05028	-1.51686	0.787273	-1.92673	0.0540137	0.1004	Basidiomycota	Tremellomycetes	Tremellales	unidentified	unidentified	Tremellales sp
New.ReferenceOTU793	1.11443	-2.24721	1.16643	-1.92657	0.0540328	0.1004	Ascomycota	Lecanoromycetes	Agyriales	Agyriaceae	Trapeliopsis	Trapeliopsis californica
New.ReferenceOTU1438	15411.2	-0.493893	0.256522	-1.92534	0.0541866	0.100453	Ascomycota	Dothideomycetes	Capnodiales	Davidiellaceae	Cladosporium	Cladosporium exasperatum
New.ReferenceOTU1025	1.0601	-2.60225	1.35446	-1.92124	0.0547016	0.100706	Basidiomycota	Tremellomycetes	Tremellales	Incertae sedis	Kockovaella	Kockovaella machilophila
New.ReferenceOTU1981	7.09188	-0.87106	0.452958	-1.92305	0.0544742	0.100706	Ascomycota	Dothideomycetes	Dothideales	Dothioraceae	Aureobasidium	Aureobasidium pullulans
New.CleanUp.ReferenceOTU4076	0.942311	-3.37443	1.75603	-1.92163	0.0546525	0.100706	Ascomycota	Sordariomycetes	Diaporthales	Diaporthaceae	Phomopsis	Phomopsis sp NY7453a
New.ReferenceOTU1947	1.43693	-1.94985	1.01585	-1.91944	0.0549293	0.100893	Ascomycota	Dothideomycetes	Capnodiales	Mycosphaerellaceae	Mycosphaerella	Mycosphaerella sp L357
New.ReferenceOTU1288	0.751014	2.79544	1.46227	1.91171	0.0559135	0.102465	Ascomycota	Dothideomycetes	Capnodiales	Incertae sedis	Capnobotryella	Capnobotryella sp
New.ReferenceOTU1392	13.4839	1.11127	0.58623	1.89561	0.0580114	0.106067	Ascomycota	Dothideomycetes	unidentified	unidentified	unidentified	Dothideomycetes sp
New.ReferenceOTU1831	93.052	1.29209	0.685337	1.88533	0.0593855	0.108331	Ascomycota	Dothideomycetes	Pleosporales	unidentified	unidentified	Pleosporales sp
New.ReferenceOTU84	1.87206	-1.71685	0.912676	-1.88112	0.0599559	0.109122	Ascomycota	Dothideomycetes	Pleosporales	Phaeosphaeriaceae	Sclerostagonospora	Sclerostagonospora sp CBS 118224
New.ReferenceOTU2401	0.972891	1.60186	0.852958	1.878	0.0603809	0.109646	Basidiomycota	Ustilaginomycetes	Ustilaginales	Ustilaginaceae	Ustilago	Ustilago maydis
New.ReferenceOTU880	0.794811	-2.22701	1.18664	-1.87674	0.0605531	0.10971	Basidiomycota	unidentified	unidentified	unidentified	unidentified	Basidiomycota sp
New.ReferenceOTU2204	1.27629	2.315	1.23568	1.87347	0.0610034	0.11007	Ascomycota	Leotiomycetes	Helotiales	Helotiaceae	unidentified	Helotiaceae sp
New.ReferenceOTU155	0.784758	-2.97046	1.58569	-1.8733	0.0610273	0.11007	Ascomycota	Dothideomycetes	Capnodiales	Teratosphaeriaceae	unidentified	uncultured Teratosphaeriaceae
New.ReferenceOTU578	1.06381	-2.97337	1.59777	-1.86096	0.0627504	0.112922	Ascomycota	Eurotiomycetes	Chaetothyriales	Herpotrichiellaceae	Capronia	Capronia sp
New.ReferenceOTU411	2.77434	1.48626	0.801744	1.85379	0.0637698	0.114499	Ascomycota	Dothideomycetes	Pleosporales	Pleosporaceae	Curvularia	Curvularia spicifera
New.ReferenceOTU1547	4.87495	-1.48918	0.807585	-1.84399	0.0651843	0.116515	Ascomycota	Leotiomycetes	Helotiales	Rutstroemiaceae	Lambertella	Lambertella corni_maris
New.CleanUp.ReferenceOTU339	0.882056	1.28412	0.696306	1.84419	0.0651554	0.116515	Ascomycota	Dothideomycetes	Pleosporales	unidentified	unidentified	Pleosporales sp
New.ReferenceOTU281	12.6144	-1.55598	0.848248	-1.83435	0.0666024	0.118256	Ascomycota	Dothideomycetes	Dothideales	Dothideaceae	Dothidea	Dothidea insculpta
New.ReferenceOTU1239	1.22083	-3.37731	1.83935	-1.83614	0.066337	0.118256	Basidiomycota	Tremellomycetes	unidentified	unidentified	unidentified	uncultured Cryptococcus
New.ReferenceOTU366	3.07781	2.01197	1.09657	1.83479	0.066537	0.118256	Ascomycota	Dothideomycetes	Patellariales	Patellariaceae	Rhytidhysteron	Rhytidhysteron sp
New.ReferenceOTU803	32.2681	1.26073	0.693612	1.81763	0.0691201	0.122455	Ascomycota	Dothideomycetes	Hysteriales	Hysteriaceae	Gloniopsis	Gloniopsis sp MFLUCC 12_0010
New.ReferenceOTU1253	2.24605	1.48304	0.818763	1.81132	0.0700909	0.1239	Ascomycota	Sordariomycetes	Lulworthiales	Lulworthiaceae	Zalerion	Zalerion arboricola
New.ReferenceOTU2158	18.8166	-0.563572	0.312415	-1.80392	0.0712436	0.125659	Ascomycota	Dothideomycetes	Capnodiales	Davidiellaceae	Cladosporium	Cladosporium exasperatum
New.ReferenceOTU144	28.1149	-0.831767	0.46148	-1.80239	0.0714844	0.125806	Ascomycota	Dothideomycetes	Pleosporales	Phaeosphaeriaceae	Sclerostagonospora	Sclerostagonospora sp
New.ReferenceOTU1163	1.20181	1.36809	0.7607	1.79847	0.0721031	0.126616	Ascomycota	Dothideomycetes	Pleosporales	Pleosporaceae	Pleospora	Pleospora herbarum
New.ReferenceOTU474	0.805324	-3.15327	1.76589	-1.78565	0.0741553	0.129934	Ascomycota	Leotiomycetes	Helotiales	Incertae sedis	Trimmatostroma	Trimmatostroma salinum
New.ReferenceOTU2194	1.73779	-2.44422	1.3715	-1.78215	0.0747253	0.130379	Ascomycota	Dothideomycetes	Incertae sedis	Incertae sedis	Asteromella	Asteromella sp
New.ReferenceOTU561	1.2991	1.55687	0.873624	1.78208	0.0747355	0.130379	Ascomycota	Incertae sedis	Incertae sedis	Incertae sedis	Xenoconiothyrium	Xenoconiothyrium catenata
New.ReferenceOTU1829	2.42872	1.45442	0.817484	1.77914	0.0752166	0.130933	Ascomycota	Sordariomycetes	Diaporthales	Incertae sedis	Valsaria	Valsaria ceratoniae
New.ReferenceOTU1280	15.3559	0.712462	0.403331	1.76644	0.0773215	0.134304	Ascomycota	unidentified	unidentified	unidentified	unidentified	Ascomycota sp AR_2010
New.ReferenceOTU192	1.26924	-2.23964	1.27112	-1.76194	0.078079	0.135326	Ascomycota	Dothideomycetes	Botryosphaeriales	unidentified	unidentified	uncultured Botryosphaeriales
New.ReferenceOTU157	1.77886	-2.09396	1.19056	-1.75881	0.0786101	0.135951	Ascomycota	unidentified	unidentified	unidentified	unidentified	Ascomycota sp
New.ReferenceOTU1498	39.5724	-1.26201	0.718176	-1.75724	0.0788764	0.136117	Ascomycota	Dothideomycetes	Capnodiales	Capnodiaceae	Capnodium	Capnodium citri
New.ReferenceOTU1430	0.86093	-2.06312	1.17497	-1.75589	0.0791075	0.136222	Ascomycota	Dothideomycetes	Capnodiales	Davidiellaceae	Davidiella	Davidiella tassiana
New.ReferenceOTU1377	0.85789	1.59202	0.908051	1.75322	0.0795636	0.136261	Ascomycota	Sordariomycetes	Coniochaetales	Coniochaetaceae	Coniochaeta	Coniochaeta sp
New.ReferenceOTU198	2.03151	1.10856	0.632463	1.75277	0.0796422	0.136261	Ascomycota	unidentified	unidentified	unidentified	unidentified	Ascomycota sp
New.ReferenceOTU1524	1.79259	1.40827	0.803416	1.75286	0.0796265	0.136261	unidentified	unidentified	unidentified	unidentified	unidentified	fungal sp VKM FW_2422
New.ReferenceOTU109	2.51082	-1.32613	0.757239	-1.75127	0.0798988	0.136408	Ascomycota	Dothideomycetes	Pleosporales	Montagnulaceae	Paraconiothyrium	Paraconiothyrium hawaiiense
New.ReferenceOTU2416	0.719654	-2.34999	1.34484	-1.74742	0.0805652	0.137253	Ascomycota	Dothideomycetes	Myriangiales	unidentified	unidentified	Myriangiales sp
New.ReferenceOTU193	26.3511	-0.64973	0.372343	-1.74498	0.0809886	0.137681	Ascomycota	Dothideomycetes	Dothideales	Dothioraceae	Aureobasidium	Aureobasidium pullulans
New.ReferenceOTU918	3.09676	-5.07653	2.92939	-1.73297	0.0831015	0.140973	Ascomycota	Dothideomycetes	Capnodiales	Mycosphaerellaceae	Xenosonderhenia	Xenosonderhenia syzygii
New.ReferenceOTU2381	1.40888	1.87102	1.08061	1.73144	0.0833726	0.141133	Ascomycota	Dothideomycetes	Pleosporales	Pleosporaceae	unidentified	Pleosporaceae sp
New.ReferenceOTU1940	2.61016	1.3329	0.770543	1.72982	0.083663	0.141325	Ascomycota	unidentified	unidentified	unidentified	unidentified	Ascomycota sp
New.ReferenceOTU457	2.28211	1.36461	0.795134	1.71619	0.0861264	0.145179	Ascomycota	Dothideomycetes	Pleosporales	Pleosporaceae	Pleospora	Pleospora herbarum
New.ReferenceOTU948	3.86923	-1.33048	0.776444	-1.71356	0.0866104	0.145688	Ascomycota	Lecanoromycetes	Ostropales	Stictidaceae	Ostropa	Ostropa barbara
New.ReferenceOTU756	0.820256	2.31186	1.36249	1.6968	0.0897351	0.150627	Ascomycota	Sordariomycetes	Xylariales	unidentified	unidentified	Xylariales sp
New.ReferenceOTU1047	0.746682	-2.48518	1.46647	-1.69466	0.0901398	0.150989	unidentified	unidentified	unidentified	unidentified	unidentified	uncultured fungus
New.ReferenceOTU639	2.03216	-2.09004	1.23907	-1.68677	0.0916471	0.152873	Ascomycota	Dothideomycetes	Capnodiales	unidentified	unidentified	Capnodiales sp
New.ReferenceOTU1581	1.04515	-1.48638	0.880891	-1.68736	0.0915347	0.152873	Ascomycota	Sordariomycetes	Hypocreales	unidentified	unidentified	Hypocreales sp
New.ReferenceOTU725	0.790792	2.16894	1.2975	1.67163	0.0945971	0.157465	Basidiomycota	Agaricomycetes	Boletales	Suillaceae	Suillus	Suillus granulatus
New.ReferenceOTU341	2.62009	1.22685	0.735057	1.66906	0.0951058	0.157982	Ascomycota	Dothideomycetes	Pleosporales	Pleosporaceae	Curvularia	Curvularia alcornii
New.ReferenceOTU1977	1.28772	-2.39276	1.436	-1.66627	0.0956603	0.158574	Ascomycota	Eurotiomycetes	Chaetothyriales	unidentified	unidentified	Chaetothyriales sp
New.ReferenceOTU1905	37.1503	1.48101	0.890126	1.66382	0.0961476	0.159052	Basidiomycota	Agaricomycetes	Agaricales	Agaricaceae	Calvatia	Calvatia pachydermica
New.ReferenceOTU965	1.798	-1.32008	0.79621	-1.65795	0.0973281	0.160672	unidentified	unidentified	unidentified	unidentified	unidentified	uncultured ectomycorrhizal fungus
New.ReferenceOTU2209	0.959746	2.03047	1.22679	1.65511	0.0979028	0.161287	Ascomycota	Dothideomycetes	Capnodiales	Incertae sedis	Meristemomyces	Meristemomyces frigidus
New.ReferenceOTU1451	0.823981	2.96528	1.79453	1.6524	0.0984523	0.161859	Ascomycota	Saccharomycetes	Saccharomycetales	Metschnikowiaceae	Metschnikowia	Metschnikowia chrysoperlae
New.ReferenceOTU2324	2.65041	1.48768	0.902327	1.64872	0.0992059	0.162763	Ascomycota	Dothideomycetes	Pleosporales	unidentified	unidentified	Pleosporales sp
New.ReferenceOTU426	3.44054	1.22691	0.747852	1.64058	0.100886	0.165179	Ascomycota	Dothideomycetes	Capnodiales	Teratosphaeriaceae	unidentified	uncultured Teratosphaeriaceae
New.ReferenceOTU1127	1.45229	-3.76528	2.30128	-1.63616	0.101805	0.166344	Basidiomycota	Agaricomycetes	Agaricales	unidentified	unidentified	Agaricales sp
New.ReferenceOTU1495	0.827857	1.57944	0.971566	1.62567	0.104021	0.169617	Ascomycota	Pezizomycetes	Pezizales	Pyronemataceae	Pyronema	Pyronema sp GSL5_6_2
New.ReferenceOTU2358	10.2212	0.975409	0.60555	1.61078	0.107227	0.174136	Ascomycota	Sordariomycetes	Xylariales	Xylariaceae	Barrmaelia	Barrmaelia macrospora
New.ReferenceOTU1727	1.40011	-3.69566	2.29295	-1.61175	0.107017	0.174136	Ascomycota	unidentified	unidentified	unidentified	unidentified	uncultured Ascomycota
New.ReferenceOTU308	1.14169	2.12641	1.32465	1.60526	0.108437	0.175743	unidentified	unidentified	unidentified	unidentified	unidentified	Fungi sp
New.ReferenceOTU1332	27.9037	-0.824129	0.51551	-1.59867	0.109895	0.177724	Ascomycota	Dothideomycetes	Dothideales	Dothioraceae	Pringsheimia	Pringsheimia sp
New.ReferenceOTU2095	1.00434	3.24256	2.02949	1.59772	0.110105	0.177724	Ascomycota	unidentified	unidentified	unidentified	unidentified	uncultured Ascomycota
New.ReferenceOTU1241	0.74987	-2.31041	1.45278	-1.59034	0.111759	0.179669	Ascomycota	Dothideomycetes	Dothideales	Dothioraceae	Aureobasidium	Aureobasidium sp
New.ReferenceOTU2398	3.10504	-2.21239	1.39036	-1.59124	0.111555	0.179669	Ascomycota	Dothideomycetes	Incertae sedis	Micropeltidaceae	Stomiopeltis	Stomiopeltis sp RS52
New.ReferenceOTU1658	0.882196	1.09408	0.688645	1.58874	0.112119	0.179885	Ascomycota	Sordariomycetes	unidentified	unidentified	unidentified	Sordariomycetes sp
New.ReferenceOTU744	20.8151	-0.620584	0.391673	-1.58445	0.113092	0.181084	Ascomycota	Dothideomycetes	Pleosporales	unidentified	unidentified	Pleosporales sp
New.ReferenceOTU1785	3.35103	1.02264	0.646255	1.58241	0.113557	0.181464	Ascomycota	Sordariomycetes	Xylariales	unidentified	unidentified	Xylariales sp
New.ReferenceOTU946	6.96766	-1.38297	0.883066	-1.5661	0.117326	0.187113	Ascomycota	unidentified	unidentified	unidentified	unidentified	Ascomycota sp
New.ReferenceOTU135	0.684612	1.95039	1.24645	1.56475	0.117642	0.187243	Ascomycota	Leotiomycetes	Helotiales	Incertae sedis	Naevala	Naevala sp
New.ReferenceOTU397	0.844169	-1.74215	1.11665	-1.56016	0.118723	0.188588	Ascomycota	Eurotiomycetes	Chaetothyriales	unidentified	unidentified	Chaetothyriales sp
New.ReferenceOTU2472	1.33225	-1.29013	0.831149	-1.55223	0.120607	0.191201	unidentified	unidentified	unidentified	unidentified	unidentified	fungal sp P1S14
New.ReferenceOTU1066	0.675975	-1.96405	1.27059	-1.54578	0.122158	0.193275	Basidiomycota	Agaricomycetes	Agaricales	Agaricaceae	Bovista	Bovista promontorii
New.ReferenceOTU320	1.04993	-2.64433	1.7123	-1.54432	0.122512	0.193453	Ascomycota	Leotiomycetes	Helotiales	Incertae sedis	Chlorencoelia	Chlorencoelia torta
New.ReferenceOTU2214	9.9622	-0.9938	0.644427	-1.54215	0.123038	0.1939	Ascomycota	Eurotiomycetes	Chaetothyriales	unidentified	unidentified	Chaetothyriales sp MSX 47445
New.ReferenceOTU925	1.08312	-2.87972	1.87195	-1.53835	0.123963	0.19459	Ascomycota	unidentified	unidentified	unidentified	unidentified	uncultured Pezizomycotina
New.ReferenceOTU69	2.00284	-1.51864	0.986745	-1.53904	0.123794	0.19459	Basidiomycota	Agaricomycetes	Russulales	Stereaceae	Gloeocystidiellum	Gloeocystidiellum sp
New.ReferenceOTU2311	30.5048	-0.753155	0.49028	-1.53617	0.124496	0.195043	Ascomycota	Dothideomycetes	Pleosporales	Incertae sedis	Phoma	Phoma sp
New.ReferenceOTU369	1.79858	-1.52186	0.996004	-1.52797	0.12652	0.197827	Ascomycota	Dothideomycetes	Capnodiales	Teratosphaeriaceae	unidentified	Teratosphaeriaceae sp
New.ReferenceOTU556	11.9785	1.00373	0.658376	1.52455	0.127371	0.198768	Ascomycota	Dothideomycetes	Capnodiales	Mycosphaerellaceae	Mycosphaerella	Mycosphaerella arbuticola
New.ReferenceOTU2490	3.34114	-1.62959	1.07932	-1.50983	0.131087	0.204168	Ascomycota	Dothideomycetes	Capnodiales	unidentified	unidentified	Capnodiales sp
New.ReferenceOTU1698	0.767567	1.63689	1.0959	1.49365	0.135268	0.21027	Ascomycota	Dothideomycetes	Pleosporales	unidentified	unidentified	Pleosporales sp
New.ReferenceOTU1914	0.700471	1.86238	1.24975	1.49019	0.136173	0.211267	Ascomycota	Dothideomycetes	unidentified	unidentified	unidentified	Dothideomycetes sp
New.ReferenceOTU1479	1.98741	-1.51777	1.02325	-1.48328	0.137999	0.213685	unidentified	unidentified	unidentified	unidentified	unidentified	fungal sp P1S14
New.ReferenceOTU892	2.95901	-0.939697	0.634606	-1.48076	0.138671	0.21431	Ascomycota	Eurotiomycetes	Chaetothyriales	Incertae sedis	Coniosporium	Coniosporium sp h6
New.ReferenceOTU1989	1.54779	-1.21516	0.827947	-1.46768	0.14219	0.219324	Ascomycota	Dothideomycetes	Capnodiales	unidentified	unidentified	Capnodiales sp
New.ReferenceOTU711	59.1786	0.460863	0.318972	1.44484	0.148503	0.228621	Ascomycota	Sordariomycetes	Xylariales	Amphisphaeriaceae	Pestalotiopsis	Pestalotiopsis sp HC02
New.ReferenceOTU262	0.86084	1.12286	0.778473	1.44239	0.149192	0.229239	Ascomycota	Eurotiomycetes	Chaetothyriales	Herpotrichiellaceae	unidentified	Herpotrichiellaceae sp
New.ReferenceOTU1254	8.4096	0.950827	0.66768	1.42408	0.154425	0.236824	Ascomycota	Dothideomycetes	Pleosporales	Sporormiaceae	unidentified	Sporormiaceae sp
New.ReferenceOTU1160	10.0733	-0.853731	0.601493	-1.41935	0.155796	0.238469	Ascomycota	Eurotiomycetes	Chaetothyriales	Herpotrichiellaceae	Phaeococcomyces	Phaeococcomyces mexicanus
New.CleanUp.ReferenceOTU2766	0.865369	1.08813	0.776891	1.40062	0.161328	0.246465	Ascomycota	Dothideomycetes	Pleosporales	Incertae sedis	Didymella	Didymella sp
New.ReferenceOTU1337	1.28461	3.60895	2.58452	1.39637	0.162602	0.247561	Ascomycota	Dothideomycetes	Botryosphaeriales	Incertae sedis	Homortomyces	Homortomyces combreti
New.ReferenceOTU2362	1.37506	-1.11193	0.79642	-1.39616	0.162665	0.247561	Ascomycota	Dothideomycetes	Myriangiales	Elsinoaceae	unidentified	Elsinoaceae sp KNUC262
New.ReferenceOTU828	0.978841	1.2292	0.882863	1.39229	0.163836	0.248869	Ascomycota	Eurotiomycetes	Eurotiales	Trichocomaceae	Talaromyces	Talaromyces amestolkiae
New.ReferenceOTU2113	1.08156	1.29773	0.936497	1.38573	0.165829	0.251419	Ascomycota	Dothideomycetes	Capnodiales	Mycosphaerellaceae	Mycosphaerella	Mycosphaerella sp 5 ICMP 18846
New.ReferenceOTU2345	1.53232	-1.03667	0.748862	-1.38433	0.166259	0.251592	Ascomycota	Arthoniomycetes	Arthoniales	Chrysothricaceae	Chrysothrix	Chrysothrix sp KWS 23
New.ReferenceOTU1256	2.60587	1.10561	0.800391	1.38134	0.167174	0.252421	Ascomycota	Dothideomycetes	Pleosporales	Pleosporaceae	unidentified	Pleosporaceae sp
New.ReferenceOTU21	4.00015	-1.71499	1.24231	-1.38048	0.167438	0.252421	Ascomycota	unidentified	unidentified	unidentified	unidentified	Ascomycota sp
New.ReferenceOTU810	1.3988	1.24504	0.903622	1.37783	0.168257	0.253177	Ascomycota	Sordariomycetes	Hypocreales	Hypocreaceae	Trichoderma	Trichoderma koningiopsis
New.ReferenceOTU2406	45.8264	0.622588	0.456227	1.36465	0.172364	0.25887	Ascomycota	Dothideomycetes	Pleosporales	Incertae sedis	Didymella	Didymella sp
New.ReferenceOTU1468	1.2283	-1.79766	1.32097	-1.36087	0.173556	0.260172	Basidiomycota	Agaricomycetes	Agaricales	unidentified	unidentified	Agaricales sp
New.ReferenceOTU2065	0.836038	-1.79366	1.31975	-1.35909	0.174117	0.260524	unidentified	unidentified	unidentified	unidentified	unidentified	uncultured fungus
New.ReferenceOTU2055	2.68946	0.793114	0.584387	1.35717	0.174726	0.260946	Ascomycota	Eurotiomycetes	Chaetothyriales	unidentified	unidentified	Chaetothyriales sp
New.ReferenceOTU2392	0.855185	-1.45247	1.07627	-1.34954	0.177164	0.264093	Ascomycota	Dothideomycetes	Pleosporales	Montagnulaceae	Paraconiothyrium	Paraconiothyrium sp NO237
New.CleanUp.ReferenceOTU3982	1.76238	-0.884965	0.656932	-1.34712	0.177942	0.264759	Ascomycota	Dothideomycetes	Capnodiales	Davidiellaceae	Davidiella	Davidiella tassiana
New.ReferenceOTU1919	3.55759	0.775171	0.578556	1.33984	0.180298	0.267766	Ascomycota	Dothideomycetes	Pleosporales	Cucurbitariaceae	Pyrenochaetopsis	Pyrenochaetopsis microspora
New.ReferenceOTU1164	8.01678	-0.922139	0.69127	-1.33398	0.182211	0.270105	Ascomycota	Sordariomycetes	Incertae sedis	Incertae sedis	Cryptovalsa	Cryptovalsa rabenhorstii
New.ReferenceOTU1237	1.37281	-1.19378	0.895719	-1.33276	0.182611	0.270197	Ascomycota	Dothideomycetes	Pleosporales	unidentified	unidentified	Pleosporales sp GS3_3_5
New.ReferenceOTU629	2.00731	1.07547	0.808782	1.32973	0.183606	0.271166	Ascomycota	Dothideomycetes	Pleosporales	unidentified	unidentified	Pleosporales sp
New.ReferenceOTU19	4.21826	-0.943854	0.710821	-1.32784	0.184232	0.271589	Ascomycota	Dothideomycetes	Capnodiales	unidentified	unidentified	Capnodiales sp
New.ReferenceOTU896	2.19828	-1.29903	0.982043	-1.32279	0.185906	0.273553	Ascomycota	Lecanoromycetes	Teloschistales	Physciaceae	Physcia	Physcia leptalea
New.ReferenceOTU2165	24.0492	0.749276	0.571086	1.31202	0.189513	0.278348	Ascomycota	Sordariomycetes	Xylariales	Amphisphaeriaceae	Truncatella	Truncatella spadicea
New.ReferenceOTU679	1.65527	-1.40108	1.08147	-1.29554	0.195134	0.286077	Ascomycota	Dothideomycetes	unidentified	unidentified	unidentified	Dothideomycetes sp
New.ReferenceOTU624	0.671107	-1.48721	1.15408	-1.28865	0.197519	0.28814	Ascomycota	Dothideomycetes	Pleosporales	Phaeosphaeriaceae	Stagonospora	Stagonospora pseudovitensis
New.ReferenceOTU1970	2.17451	0.79099	0.613954	1.28835	0.197623	0.28814	Ascomycota	Sordariomycetes	unidentified	unidentified	unidentified	Sordariomycetes sp
New.ReferenceOTU520	5.31484	-0.76754	0.595669	-1.28853	0.19756	0.28814	Ascomycota	unidentified	unidentified	unidentified	unidentified	Ascomycota sp
New.ReferenceOTU2522	1.31371	-0.986978	0.76829	-1.28464	0.198917	0.289499	Ascomycota	unidentified	unidentified	unidentified	unidentified	Ascomycota sp
New.ReferenceOTU237	2.02672	0.947809	0.740287	1.28033	0.200431	0.291171	Ascomycota	Dothideomycetes	Pleosporales	Incertae sedis	Periconia	Periconia sp CY191
New.ReferenceOTU464	0.697683	2.31398	1.814	1.27562	0.20209	0.293049	Ascomycota	Sordariomycetes	Sordariales	Lasiosphaeriaceae	Podospora	Podospora decipiens
New.ReferenceOTU774	1.63824	1.00152	0.786337	1.27366	0.202785	0.293524	Basidiomycota	Microbotryomycetes	Sporidiobolales	Incertae sedis	Sporobolomyces	Sporobolomyces coprosmae
New.ReferenceOTU2414	2.28675	1.00836	0.797503	1.2644	0.206088	0.297228	Ascomycota	Dothideomycetes	Pleosporales	Pleosporaceae	Bipolaris	Bipolaris cynodontis
New.CleanUp.ReferenceOTU1953	0.800697	-1.67802	1.32625	-1.26524	0.205785	0.297228	Ascomycota	Eurotiomycetes	Chaetothyriales	unidentified	unidentified	Chaetothyriales sp
New.ReferenceOTU563	2.0399	-1.68808	1.35058	-1.24989	0.211339	0.304252	Ascomycota	unidentified	unidentified	unidentified	unidentified	Ascomycota sp
New.ReferenceOTU1817	1.83254	1.53792	1.23373	1.24656	0.21256	0.304912	Ascomycota	Dothideomycetes	Dothideales	Dothideaceae	Endoconidioma	Endoconidioma populi
New.ReferenceOTU1854	15.8987	-0.690603	0.553976	-1.24663	0.212533	0.304912	Basidiomycota	Microbotryomycetes	Sporidiobolales	Incertae sedis	Rhodotorula	Rhodotorula aurantiaca
New.ReferenceOTU770	1.07169	1.29991	1.04638	1.24229	0.21413	0.306613	Ascomycota	Sordariomycetes	Sordariales	Lasiosphaeriaceae	unidentified	Lasiosphaeriaceae sp
New.ReferenceOTU1267	0.917735	-1.2729	1.02783	-1.23844	0.215554	0.308099	Ascomycota	Eurotiomycetes	Chaetothyriales	unidentified	unidentified	Chaetothyriales sp
New.ReferenceOTU2037	1.42284	-0.943016	0.762526	-1.2367	0.216198	0.308469	Ascomycota	unidentified	unidentified	unidentified	unidentified	Ascomycota sp
New.ReferenceOTU534	1.05632	1.03531	0.841424	1.23043	0.218536	0.311248	Basidiomycota	unidentified	unidentified	unidentified	unidentified	Basidiomycota sp
New.ReferenceOTU201	0.757016	2.8503	2.32542	1.22571	0.220306	0.313211	Ascomycota	Dothideomycetes	Incertae sedis	Incertae sedis	Scleroconidioma	Scleroconidioma sphagnicola
New.ReferenceOTU195	0.840731	1.91546	1.57609	1.21533	0.224242	0.318089	Ascomycota	unidentified	unidentified	unidentified	unidentified	uncultured Ascomycota
New.ReferenceOTU39	2.18949	-1.01612	0.837335	-1.21352	0.224932	0.318089	Ascomycota	Dothideomycetes	Pleosporales	unidentified	unidentified	Pleosporales sp
New.CleanUp.ReferenceOTU1178	2.74695	-2.0048	1.65145	-1.21397	0.22476	0.318089	Ascomycota	Dothideomycetes	Pleosporales	unidentified	unidentified	Pleosporales sp
New.ReferenceOTU704	0.95926	-1.50003	1.24102	-1.20871	0.226775	0.320129	unidentified	unidentified	unidentified	unidentified	unidentified	Fungi sp
New.ReferenceOTU687	3.03699	-1.00671	0.836465	-1.20353	0.228771	0.322378	Ascomycota	unidentified	unidentified	unidentified	unidentified	uncultured Ascomycota
New.ReferenceOTU1006	3.21489	-0.869595	0.728758	-1.19326	0.232769	0.327433	Ascomycota	Dothideomycetes	unidentified	unidentified	unidentified	Dothideomycetes sp
New.ReferenceOTU2098	5.45023	-0.532083	0.448674	-1.1859	0.235662	0.33092	Ascomycota	Dothideomycetes	Capnodiales	Davidiellaceae	Cladosporium	Cladosporium fusiforme
New.ReferenceOTU2152	4.16494	0.677751	0.577725	1.17314	0.24074	0.337459	Basidiomycota	Agaricomycetes	Agaricales	Psathyrellaceae	Coprinellus	Coprinellus sp
New.ReferenceOTU252	1.25203	0.840111	0.720559	1.16592	0.243648	0.340937	Ascomycota	Sordariomycetes	Sordariales	Chaetomiaceae	Chaetomium	Chaetomium sp
New.ReferenceOTU853	3.14221	-1.67818	1.45166	-1.15605	0.247662	0.345387	Ascomycota	Dothideomycetes	Pleosporales	unidentified	unidentified	fungal endophyte WMS23
New.ReferenceOTU1657	3.73177	0.90357	0.78237	1.15491	0.248125	0.345387	Ascomycota	Dothideomycetes	Capnodiales	unidentified	unidentified	Capnodiales sp M_Camp7
New.ReferenceOTU472	1.25528	1.35748	1.17468	1.15561	0.247839	0.345387	Ascomycota	Dothideomycetes	Pleosporales	Phaeosphaeriaceae	Phaeosphaeria	Phaeosphaeria sp
New.CleanUp.ReferenceOTU4624	3.85209	-0.651587	0.569018	-1.14511	0.252165	0.350399	Ascomycota	Dothideomycetes	Pleosporales	Montagnulaceae	Paraconiothyrium	Paraconiothyrium hawaiiense
New.ReferenceOTU645	1.7773	1.05312	0.922528	1.14156	0.253639	0.351836	Ascomycota	Dothideomycetes	Pleosporales	Phaeosphaeriaceae	Phaeosphaeria	Phaeosphaeria sp
New.ReferenceOTU462	1.03168	2.40858	2.11189	1.14049	0.254084	0.351843	unidentified	unidentified	unidentified	unidentified	unidentified	Fungi sp
New.ReferenceOTU1521	1.95476	-0.56508	0.496637	-1.13781	0.255198	0.352774	Ascomycota	Dothideomycetes	Capnodiales	Davidiellaceae	Cladosporium	Cladosporium exasperatum
New.ReferenceOTU543	1.0047	1.37875	1.24	1.1119	0.266182	0.367323	Ascomycota	Pezizomycetes	Pezizales	Sarcosomataceae	Strumella	Strumella sp olrim138
New.ReferenceOTU1503	0.950434	-1.35307	1.22297	-1.10638	0.268561	0.369255	Ascomycota	Dothideomycetes	unidentified	unidentified	unidentified	Dothideomycetes sp
New.ReferenceOTU1456	3.38419	-0.688074	0.622443	-1.10544	0.268969	0.369255	Ascomycota	unidentified	unidentified	unidentified	unidentified	uncultured Ascomycota
New.CleanUp.ReferenceOTU418	1.34756	1.169	1.05618	1.10682	0.26837	0.369255	Ascomycota	Dothideomycetes	unidentified	unidentified	unidentified	Dothideomycetes sp
New.ReferenceOTU2042	1.35409	0.958475	0.867939	1.10431	0.269458	0.369291	Basidiomycota	Tremellomycetes	Tremellales	Incertae sedis	Cryptococcus	Cryptococcus phenolicus
New.ReferenceOTU439	0.695263	-1.82143	1.66701	-1.09263	0.274556	0.375634	Ascomycota	Dothideomycetes	Capnodiales	Mycosphaerellaceae	Passalora	Passalora zambiae
New.ReferenceOTU2235	0.940105	1.16495	1.07504	1.08364	0.278525	0.380413	Ascomycota	Dothideomycetes	Botryosphaeriales	Incertae sedis	Homortomyces	Homortomyces combreti
New.ReferenceOTU940	4.74235	0.876632	0.816415	1.07376	0.282931	0.385771	Ascomycota	Dothideomycetes	Pleosporales	Incertae sedis	Phoma	Phoma sp LF258
New.ReferenceOTU147	1.14689	-1.74654	1.63988	-1.06504	0.286858	0.389134	Ascomycota	Dothideomycetes	Pleosporales	Leptosphaeriaceae	Plenodomus	Plenodomus enteroleucus
New.ReferenceOTU337	3.19791	-0.800537	0.75111	-1.0658	0.286512	0.389134	unidentified	unidentified	unidentified	unidentified	unidentified	uncultured fungus
New.ReferenceOTU96	1.35028	0.923137	0.865394	1.06672	0.286096	0.389134	unidentified	unidentified	unidentified	unidentified	unidentified	uncultured fungus
New.ReferenceOTU2025	0.917472	-1.30806	1.22947	-1.06392	0.287364	0.389159	Ascomycota	Saccharomycetes	Saccharomycetales	Saccharomycetaceae	Tetrapisispora	Tetrapisispora blattae
New.ReferenceOTU734	2.5508	-0.825021	0.779143	-1.05888	0.289654	0.390275	Ascomycota	Eurotiomycetes	Chaetothyriales	Herpotrichiellaceae	unidentified	Herpotrichiellaceae sp
New.ReferenceOTU1812	1.01278	-1.17188	1.10664	-1.05895	0.289624	0.390275	Ascomycota	Dothideomycetes	Pleosporales	unidentified	unidentified	Pleosporales sp MUT 4397
New.ReferenceOTU354	1.51452	0.889674	0.839597	1.05964	0.289307	0.390275	Ascomycota	Dothideomycetes	Pleosporales	Leptosphaeriaceae	Leptosphaeria	Leptosphaeria sp
New.ReferenceOTU2344	1.25993	1.1623	1.09959	1.05704	0.290495	0.39075	Ascomycota	Dothideomycetes	unidentified	unidentified	unidentified	Dothideomycetes sp
New.ReferenceOTU1225	1.34956	1.18684	1.12694	1.05316	0.292267	0.392473	Ascomycota	Dothideomycetes	Pleosporales	Sporormiaceae	Sporormiella	Sporormiella irregularis
New.ReferenceOTU1363	0.783411	-1.30709	1.24615	-1.04891	0.294222	0.394435	Ascomycota	unidentified	unidentified	unidentified	unidentified	Ascomycota sp
New.ReferenceOTU2128	1.61324	-1.29588	1.25043	-1.03635	0.300041	0.401562	Ascomycota	Dothideomycetes	Pleosporales	unidentified	unidentified	Pleosporales sp
New.ReferenceOTU2088	2.15171	-0.858611	0.834815	-1.0285	0.303713	0.405797	Ascomycota	Dothideomycetes	Pleosporales	Sporormiaceae	Preussia	Preussia tetramera
New.ReferenceOTU658	1.01937	-1.796	1.74818	-1.02735	0.304254	0.405841	Ascomycota	Sordariomycetes	Xylariales	Diatrypaceae	unidentified	Diatrypaceae sp
New.ReferenceOTU924	1.0926	-1.03993	1.02425	-1.01532	0.309954	0.412756	Basidiomycota	Agaricomycetes	Russulales	Peniophoraceae	Dendrophora	Dendrophora sp
New.ReferenceOTU485	2.69776	0.631624	0.628306	1.00528	0.314761	0.41846	unidentified	unidentified	unidentified	unidentified	unidentified	uncultured fungus
New.ReferenceOTU1554	21.1562	0.293398	0.297152	0.987367	0.323463	0.428915	Ascomycota	Dothideomycetes	Capnodiales	Davidiellaceae	Cladosporium	Cladosporium exasperatum
New.CleanUp.ReferenceOTU3088	1.07079	0.708772	0.718191	0.986885	0.323699	0.428915	Ascomycota	Dothideomycetes	Capnodiales	Davidiellaceae	Davidiella	Davidiella tassiana
New.ReferenceOTU668	3.53493	0.786748	0.800009	0.983423	0.325399	0.430454	Ascomycota	Sordariomycetes	Xylariales	Xylariaceae	unidentified	Xylariales sp M71
New.ReferenceOTU38	3.93567	0.773279	0.788243	0.981016	0.326585	0.431308	Basidiomycota	Pucciniomycetes	Pucciniales	Uropyxidaceae	Tranzschelia	Tranzschelia discolor
New.ReferenceOTU178	1.11332	-1.88871	1.93198	-0.977603	0.328271	0.432819	Ascomycota	Dothideomycetes	Venturiales	Venturiaceae	Venturia	Venturia pyrina
New.ReferenceOTU141	1.23344	-1.11095	1.14243	-0.972441	0.330831	0.435476	Ascomycota	Lecanoromycetes	Lecanorales	Incertae sedis	Solenopsora	Solenopsora holophaea
New.ReferenceOTU10	10.008	-0.719304	0.750991	-0.957807	0.33816	0.444391	Ascomycota	Dothideomycetes	unidentified	unidentified	unidentified	Dothideomycetes sp
New.ReferenceOTU1320	3.44246	0.79065	0.828883	0.953874	0.340147	0.446269	Ascomycota	Dothideomycetes	Capnodiales	unidentified	unidentified	Capnodiales sp M_Camp7
New.ReferenceOTU709	1.26546	0.662598	0.700021	0.94654	0.343873	0.450418	Ascomycota	unidentified	unidentified	unidentified	unidentified	uncultured Ascomycota
New.ReferenceOTU663	1.42284	1.13167	1.19974	0.943263	0.345547	0.451869	Ascomycota	Dothideomycetes	Pleosporales	Sporormiaceae	Preussia	Preussia sp
New.CleanUp.ReferenceOTU1	1.0416	-0.704443	0.748576	-0.941044	0.346682	0.4526	Ascomycota	Dothideomycetes	Dothideales	Dothioraceae	Aureobasidium	Aureobasidium pullulans
New.CleanUp.ReferenceOTU47	0.841106	0.872379	0.928104	0.939958	0.347239	0.4526	Ascomycota	Eurotiomycetes	Eurotiales	Trichocomaceae	Penicillium	Penicillium oxalicum
New.ReferenceOTU285	1.45045	-1.02203	1.09665	-0.931954	0.35136	0.457226	Ascomycota	Leotiomycetes	Erysiphales	Erysiphaceae	Erysiphe	Erysiphe convolvuli
New.ReferenceOTU2058	0.972858	1.12862	1.21386	0.92978	0.352485	0.457944	Ascomycota	Dothideomycetes	Capnodiales	Mycosphaerellaceae	Pseudocercospora	Pseudocercospora sphaerellae_eugeniae
New.ReferenceOTU1200	1.61371	0.754616	0.816185	0.924565	0.355192	0.460712	unidentified	unidentified	unidentified	unidentified	unidentified	uncultured fungus
New.ReferenceOTU579	65.2857	0.367531	0.400343	0.918041	0.358597	0.464375	Ascomycota	Dothideomycetes	Dothideales	Dothioraceae	Aureobasidium	Aureobasidium pullulans
New.ReferenceOTU1070	1.14637	-1.80098	1.96713	-0.915535	0.359911	0.465322	Ascomycota	Dothideomycetes	Capnodiales	Mycosphaerellaceae	Pseudocercospora	Pseudocercospora opuntia
New.ReferenceOTU1772	8.80189	-0.348618	0.3813	-0.914289	0.360565	0.465414	Ascomycota	Dothideomycetes	Capnodiales	Davidiellaceae	Cladosporium	Cladosporium exasperatum
New.ReferenceOTU389	1.15751	-0.758244	0.830905	-0.912553	0.361478	0.46584	Ascomycota	unidentified	unidentified	unidentified	unidentified	uncultured Ascomycota
New.ReferenceOTU1352	1.98997	0.814175	0.896562	0.908109	0.363821	0.468104	Ascomycota	Eurotiomycetes	Chaetothyriales	Herpotrichiellaceae	Phaeomoniella	Phaeomoniella sp
New.ReferenceOTU1100	2.48215	0.720892	0.797337	0.904125	0.365929	0.47006	Ascomycota	Dothideomycetes	Pleosporales	unidentified	unidentified	Pleosporales sp
New.ReferenceOTU1017	0.728512	1.51319	1.67674	0.902457	0.366814	0.470441	Basidiomycota	Agaricomycetes	Agaricales	Psathyrellaceae	Parasola	Parasola leiocephala
New.ReferenceOTU97	1.06108	-1.23507	1.38197	-0.893707	0.371478	0.475659	Basidiomycota	Microbotryomycetes	Sporidiobolales	Incertae sedis	Sporobolomyces	Sporobolomyces sp TD49
New.CleanUp.ReferenceOTU568	0.678121	0.737649	0.831118	0.887538	0.374789	0.479131	Ascomycota	Dothideomycetes	Capnodiales	Davidiellaceae	Cladosporium	Cladosporium exasperatum
New.ReferenceOTU2254	1.43827	-0.878566	0.995089	-0.882902	0.377289	0.481556	Ascomycota	Lecanoromycetes	Candelariales	Candelariaceae	Candelariella	Candelariella rosulans
New.ReferenceOTU743	0.957989	-1.6748	1.93041	-0.867588	0.38562	0.490622	Ascomycota	Dothideomycetes	unidentified	unidentified	unidentified	Dothideomycetes sp
New.ReferenceOTU256	2.38903	0.774671	0.892683	0.8678	0.385504	0.490622	Ascomycota	Dothideomycetes	Pleosporales	Cucurbitariaceae	Curreya	Curreya sp
New.ReferenceOTU812	1.121	0.618154	0.713847	0.865947	0.386519	0.490984	Ascomycota	Sordariomycetes	Hypocreales	Nectriaceae	Fusarium	Fusarium tricinctum
New.ReferenceOTU2479	5.50843	0.564212	0.654587	0.861937	0.388722	0.492999	Ascomycota	Dothideomycetes	Dothideales	Dothioraceae	Sydowia	Sydowia sp
New.ReferenceOTU2446	0.675675	1.03946	1.20996	0.859086	0.390293	0.494206	Basidiomycota	Agaricomycetes	Agaricales	Strophariaceae	Hypholoma	Hypholoma australe
New.ReferenceOTU786	10.2844	-0.534433	0.63165	-0.846091	0.397502	0.502538	unidentified	unidentified	unidentified	unidentified	unidentified	uncultured fungus
New.ReferenceOTU693	0.866983	-1.31648	1.5581	-0.844925	0.398153	0.502565	Basidiomycota	Tremellomycetes	Tremellales	unidentified	unidentified	Tremellales sp
New.ReferenceOTU747	0.810298	-0.915872	1.09328	-0.83773	0.402182	0.506851	Ascomycota	Dothideomycetes	Pleosporales	Phaeosphaeriaceae	Sclerostagonospora	Sclerostagonospora sp CBS 118224
New.ReferenceOTU2180	4.58841	-0.536343	0.645592	-0.830777	0.4061	0.510982	Ascomycota	Lecanoromycetes	Teloschistales	Teloschistaceae	Teloschistes	Teloschistes chrysophthalmus
New.ReferenceOTU54	0.815516	0.932603	1.13546	0.821344	0.41145	0.516901	Ascomycota	Leotiomycetes	Helotiales	Vibrisseaceae	Phialocephala	Phialocephala fluminis
New.ReferenceOTU280	4.56573	-0.452628	0.553581	-0.817638	0.413564	0.518741	Ascomycota	Eurotiomycetes	Eurotiales	Trichocomaceae	Penicillium	Penicillium brevicompactum
New.ReferenceOTU174	3.04871	-0.689955	0.852626	-0.809212	0.418393	0.523975	Ascomycota	unidentified	unidentified	unidentified	unidentified	ascomycete sp IZ_1147
New.ReferenceOTU1984	3.44237	0.36521	0.452577	0.806956	0.419692	0.524135	Ascomycota	Dothideomycetes	Pleosporales	unidentified	unidentified	Pleosporales sp
New.ReferenceOTU481	2.4417	0.713547	0.884514	0.806711	0.419833	0.524135	Ascomycota	Dothideomycetes	Dothideales	Dothideaceae	Endoconidioma	Endoconidioma populi
New.ReferenceOTU968	1.36504	0.613802	0.76224	0.80526	0.420669	0.52436	Basidiomycota	Agaricomycetes	Agaricales	Agaricaceae	Mycenastrum	Mycenastrum corium
New.ReferenceOTU712	1.92557	-0.712121	0.886115	-0.803644	0.421603	0.524705	Ascomycota	Dothideomycetes	Capnodiales	Teratosphaeriaceae	Teratosphaeria	Teratosphaeria capensis
New.ReferenceOTU1950	2.91819	0.937053	1.16776	0.802435	0.422302	0.524757	Ascomycota	Dothideomycetes	unidentified	unidentified	unidentified	Dothideomycetes sp
New.ReferenceOTU413	138.561	-0.200616	0.253317	-0.791953	0.428388	0.531494	Ascomycota	Dothideomycetes	Capnodiales	Davidiellaceae	Cladosporium	Cladosporium exasperatum
New.ReferenceOTU1184	0.935618	0.711202	0.900427	0.78985	0.429615	0.53219	Ascomycota	Eurotiomycetes	Eurotiales	Trichocomaceae	Aspergillus	Aspergillus amstelodami
New.ReferenceOTU806	0.91077	-0.997028	1.26555	-0.78782	0.430802	0.532834	Ascomycota	Dothideomycetes	Pleosporales	Incertae sedis	Phoma	Phoma paspali
New.ReferenceOTU1706	0.967778	0.621109	0.805239	0.771335	0.440509	0.543997	Ascomycota	Dothideomycetes	Dothideales	Dothideaceae	Endoconidioma	Endoconidioma populi
New.CleanUp.ReferenceOTU4823	0.838084	-0.836624	1.09105	-0.766803	0.443198	0.546475	unidentified	unidentified	unidentified	unidentified	unidentified	uncultured fungus
New.ReferenceOTU1111	2.31238	0.515081	0.674774	0.763338	0.445262	0.548173	Ascomycota	Dothideomycetes	Capnodiales	unidentified	unidentified	Capnodiales sp
New.ReferenceOTU1348	1.45004	0.67026	0.887913	0.75487	0.450327	0.553555	Basidiomycota	Tremellomycetes	Tremellales	Incertae sedis	Cryptococcus	Cryptococcus heimaeyensis
New.ReferenceOTU2131	1.03828	0.807593	1.07295	0.752685	0.451639	0.554316	Ascomycota	unidentified	unidentified	unidentified	unidentified	Ascomycota sp
New.ReferenceOTU1049	1.09288	0.784964	1.05916	0.741119	0.458621	0.561714	Basidiomycota	Agaricomycetes	Agaricales	Psathyrellaceae	Coprinopsis	Coprinopsis radiata
New.ReferenceOTU1016	137.098	-0.463729	0.626345	-0.740374	0.459073	0.561714	Ascomycota	Dothideomycetes	Capnodiales	Capnodiaceae	Capnodium	Capnodium sp
New.ReferenceOTU2172	6.01241	0.517142	0.700195	0.738569	0.460168	0.562194	Ascomycota	Dothideomycetes	Pleosporales	Sporormiaceae	unidentified	Sporormiaceae sp
New.ReferenceOTU0	1.49808	0.798907	1.08553	0.735962	0.461754	0.563269	Basidiomycota	Microbotryomycetes	Microbotryales	Microbotryaceae	Sphacelotheca	Sphacelotheca polygoni_persicariae
New.ReferenceOTU2352	0.92407	1.065	1.45523	0.73184	0.464266	0.56547	Ascomycota	Dothideomycetes	Pleosporales	Incertae sedis	Phoma	Phoma sp A15
New.ReferenceOTU334	1.18681	1.79004	2.45034	0.73053	0.465067	0.565583	Ascomycota	Saccharomycetes	Saccharomycetales	Saccharomycetaceae	Saccharomyces	Saccharomyces eubayanus
New.ReferenceOTU1570	1.05634	-0.837213	1.15639	-0.723989	0.469072	0.569588	Ascomycota	Dothideomycetes	Myriangiales	Elsinoaceae	unidentified	Elsinoaceae sp ZLY_2010b
New.ReferenceOTU1918	1.71944	0.581511	0.805516	0.721911	0.470349	0.570271	Basidiomycota	Agaricomycetes	Agaricales	unidentified	unidentified	Agaricales sp
New.ReferenceOTU1123	0.679827	-1.34977	1.89583	-0.711967	0.476485	0.576836	Ascomycota	Leotiomycetes	Helotiales	Dermateaceae	unidentified	Dermateaceae sp
New.ReferenceOTU50	2.93998	0.596925	0.853647	0.699264	0.484387	0.585515	Ascomycota	Dothideomycetes	Pleosporales	unidentified	unidentified	Pleosporales sp
New.ReferenceOTU512	1.30236	1.13798	1.63488	0.696061	0.486391	0.587049	Ascomycota	Dothideomycetes	Hysteriales	Gloniaceae	Cenococcum	uncultured Cenococcum
New.ReferenceOTU1272	3.62761	0.444141	0.645044	0.688544	0.49111	0.591851	Ascomycota	Dothideomycetes	Pleosporales	Pleosporaceae	unidentified	Pleosporaceae sp
New.ReferenceOTU730	0.989617	0.955222	1.3901	0.687161	0.491981	0.592008	Ascomycota	unidentified	unidentified	unidentified	unidentified	Ascomycota sp
New.ReferenceOTU492	3.66313	-0.605703	0.883301	-0.685727	0.492885	0.592203	Ascomycota	Dothideomycetes	Pleosporales	Incertae sedis	Berkleasmium	Berkleasmium sp
New.ReferenceOTU1037	0.954903	0.63863	0.936733	0.681763	0.495389	0.594318	Ascomycota	Dothideomycetes	Capnodiales	unidentified	unidentified	Capnodiales sp
New.ReferenceOTU2428	3.3229	-0.639649	0.940799	-0.679899	0.496568	0.59484	Ascomycota	Dothideomycetes	Capnodiales	Incertae sedis	Toxicocladosporium	Toxicocladosporium leucadendri
New.CleanUp.ReferenceOTU5030	9.28454	0.436137	0.644259	0.676958	0.498433	0.596179	Ascomycota	Dothideomycetes	Pleosporales	Sporormiaceae	unidentified	Sporormiaceae sp
New.ReferenceOTU878	0.811136	0.665791	0.99735	0.66756	0.504414	0.602432	Basidiomycota	Ustilaginomycetes	Ustilaginales	Ustilaginaceae	Ustilago	Ustilago striiformis
New.ReferenceOTU1796	2.22591	0.518509	0.782393	0.662722	0.507509	0.605223	Ascomycota	Dothideomycetes	Pleosporales	Sporormiaceae	unidentified	Sporormiaceae sp
New.ReferenceOTU1957	0.919682	-0.783123	1.18682	-0.659849	0.509351	0.606515	unidentified	unidentified	unidentified	unidentified	unidentified	uncultured fungus
New.ReferenceOTU2343	0.986758	-0.666021	1.01913	-0.653518	0.513422	0.610453	Ascomycota	unidentified	unidentified	unidentified	unidentified	Ascomycota sp
New.ReferenceOTU1836	1.18212	-0.83113	1.27911	-0.649771	0.51584	0.612416	Basidiomycota	Agaricomycetes	Russulales	unidentified	unidentified	Russulales sp
New.ReferenceOTU2447	3.20473	-0.434573	0.679535	-0.639515	0.522488	0.619388	Ascomycota	Dothideomycetes	unidentified	unidentified	unidentified	Dothideomycetes sp
New.ReferenceOTU1952	1.56139	-0.727739	1.15654	-0.629237	0.529194	0.626408	Ascomycota	Eurotiomycetes	Chaetothyriales	Herpotrichiellaceae	Phaeomoniella	Phaeomoniella sp
New.ReferenceOTU2191	1.41773	0.575493	0.922343	0.623947	0.532662	0.629582	unidentified	unidentified	unidentified	unidentified	unidentified	uncultured fungus
New.ReferenceOTU959	0.968969	-1.10269	1.78078	-0.619216	0.535774	0.632324	Ascomycota	Lecanoromycetes	Teloschistales	Physciaceae	unidentified	Physciaceae sp KWS 26
New.ReferenceOTU796	2.40895	0.580472	0.942548	0.615854	0.537991	0.634004	Ascomycota	unidentified	unidentified	unidentified	unidentified	Ascomycota sp
New.ReferenceOTU1966	2.26408	-0.479256	0.782685	-0.612322	0.540325	0.635816	unidentified	unidentified	unidentified	unidentified	unidentified	fungal sp FF_2011
New.ReferenceOTU2127	0.909198	0.663335	1.0908	0.608119	0.543108	0.638152	Basidiomycota	Tremellomycetes	Tremellales	Incertae sedis	Cryptococcus	Cryptococcus dimennae
New.ReferenceOTU62	1.11114	0.915491	1.52505	0.600302	0.548305	0.643312	Ascomycota	Dothideomycetes	Incertae sedis	Micropeltidaceae	Stomiopeltis	Stomiopeltis sp T49A1c
New.ReferenceOTU149	0.965803	0.756329	1.27333	0.593976	0.552528	0.646862	Ascomycota	Dothideomycetes	Myriangiales	unidentified	unidentified	Myriangiales sp
New.ReferenceOTU1566	0.714417	-0.932719	1.57196	-0.593346	0.55295	0.646862	Basidiomycota	Agaricomycetes	Polyporales	unidentified	unidentified	Polyporales sp
New.ReferenceOTU820	3.40425	-0.369073	0.626427	-0.589171	0.555747	0.648236	Ascomycota	Dothideomycetes	Pleosporales	unidentified	unidentified	Pleosporales sp
New.ReferenceOTU1720	1.6154	-0.588224	0.996928	-0.590036	0.555166	0.648236	Ascomycota	Eurotiomycetes	Chaetothyriales	Herpotrichiellaceae	Phaeococcomyces	Phaeococcomyces aff nigricans P40D010
New.ReferenceOTU388	2.70484	-0.584364	1.00047	-0.584087	0.559162	0.650413	unidentified	unidentified	unidentified	unidentified	unidentified	uncultured fungus
New.ReferenceOTU1380	16.1859	0.413296	0.707736	0.583969	0.559241	0.650413	Ascomycota	unidentified	unidentified	unidentified	unidentified	Ascomycota sp
New.ReferenceOTU2460	0.818556	0.644514	1.10692	0.58226	0.560392	0.650804	Ascomycota	Sordariomycetes	Xylariales	Diatrypaceae	Diatrype	Diatrype sp FPT_5
New.ReferenceOTU2287	14.3416	0.428318	0.753991	0.568068	0.569989	0.660031	Ascomycota	Sordariomycetes	Xylariales	unidentified	unidentified	Xylariales sp
New.ReferenceOTU2141	1.48834	0.560945	0.985818	0.569014	0.569347	0.660031	Ascomycota	Dothideomycetes	unidentified	unidentified	unidentified	Dothideomycetes sp
New.ReferenceOTU1105	3.16223	0.529487	0.944217	0.560769	0.574955	0.664818	unidentified	unidentified	unidentified	unidentified	unidentified	uncultured fungus
New.ReferenceOTU662	2.93451	0.387248	0.719515	0.538207	0.590434	0.681729	Basidiomycota	Ustilaginomycetes	Ustilaginales	unidentified	unidentified	Ustilaginales sp
New.ReferenceOTU1107	4.09011	0.326513	0.615837	0.530193	0.595978	0.687138	unidentified	unidentified	unidentified	unidentified	unidentified	uncultured fungus
New.ReferenceOTU2062	0.856587	-0.535476	1.01245	-0.52889	0.596882	0.687188	Ascomycota	Dothideomycetes	Capnodiales	unidentified	unidentified	Capnodiales sp
New.ReferenceOTU1787	13.3765	0.360102	0.68485	0.525812	0.599019	0.688656	unidentified	unidentified	unidentified	unidentified	unidentified	uncultured fungus
New.ReferenceOTU1040	1.00158	-0.702127	1.35236	-0.519186	0.603631	0.692962	Ascomycota	Dothideomycetes	Pleosporales	Phaeosphaeriaceae	Stagonospora	Stagonospora sp TA26_24
New.ReferenceOTU926	1.4936	-0.423934	0.826701	-0.512802	0.60809	0.696608	Ascomycota	Dothideomycetes	unidentified	unidentified	unidentified	Dothideomycetes sp
New.ReferenceOTU1166	0.887335	-0.505905	0.98782	-0.512143	0.608551	0.696608	Ascomycota	Sordariomycetes	Coniochaetales	Coniochaetaceae	unidentified	Coniochaetaceae sp
New.ReferenceOTU869	8.26888	-0.266821	0.52241	-0.51075	0.609526	0.696726	Ascomycota	Eurotiomycetes	Chaetothyriales	Herpotrichiellaceae	Phaeomoniella	Phaeomoniella niveniae
New.ReferenceOTU1407	1.08603	-0.66189	1.33678	-0.495139	0.620502	0.708259	Ascomycota	Dothideomycetes	Capnodiales	unidentified	unidentified	Capnodiales sp
New.ReferenceOTU3	4.0286	-0.278371	0.572811	-0.485974	0.626986	0.714639	Ascomycota	unidentified	unidentified	unidentified	unidentified	uncultured Ascomycota
New.ReferenceOTU1551	1.38249	-0.487962	1.02201	-0.477452	0.63304	0.720512	Basidiomycota	Tremellomycetes	Tremellales	Incertae sedis	Cryptococcus	Cryptococcus sp CBS 8358
New.ReferenceOTU380	3.34569	0.462723	0.973562	0.475288	0.634581	0.721238	Ascomycota	Dothideomycetes	Pleosporales	Sporormiaceae	unidentified	Sporormiaceae sp
New.ReferenceOTU1584	2.26594	0.353973	0.756236	0.468072	0.639733	0.725146	Ascomycota	Dothideomycetes	Pleosporales	Sporormiaceae	Sporormiella	Sporormiella australis
New.ReferenceOTU2138	1.36742	0.372103	0.795211	0.46793	0.639835	0.725146	Basidiomycota	Agaricomycetes	Agaricales	Strophariaceae	Gymnopilus	Gymnopilus junonius
New.ReferenceOTU2020	1.84403	0.304455	0.660292	0.461091	0.644733	0.729663	Ascomycota	Dothideomycetes	Capnodiales	Davidiellaceae	Cladosporium	Cladosporium exasperatum
New.ReferenceOTU540	3.73961	1.21491	2.64644	0.459071	0.646183	0.730269	Ascomycota	Dothideomycetes	Botryosphaeriales	Aplosporellaceae	Aplosporella	Aplosporella javeedii
New.ReferenceOTU852	2.13694	0.593809	1.30054	0.456584	0.64797	0.731254	Ascomycota	Dothideomycetes	Capnodiales	Teratosphaeriaceae	Catenulostroma	Catenulostroma hermanusense
New.ReferenceOTU1656	1.35605	0.518701	1.14131	0.45448	0.649483	0.731928	Ascomycota	Dothideomycetes	unidentified	unidentified	unidentified	Dothideomycetes sp
New.ReferenceOTU2011	1.36474	-0.746271	1.66415	-0.448438	0.653837	0.735009	Ascomycota	Dothideomycetes	Pleosporales	Pleosporaceae	Bipolaris	Bipolaris sp HSAUP074449
New.ReferenceOTU1281	1.63604	0.551922	1.2316	0.448134	0.654057	0.735009	Ascomycota	Dothideomycetes	Capnodiales	unidentified	unidentified	Capnodiales sp
New.CleanUp.ReferenceOTU1167	0.883324	0.318042	0.716078	0.444144	0.656939	0.737211	Ascomycota	Dothideomycetes	Capnodiales	Davidiellaceae	Cladosporium	Cladosporium exasperatum
New.ReferenceOTU479	4.30498	0.425566	0.971504	0.438049	0.661351	0.741121	Ascomycota	Dothideomycetes	Pleosporales	unidentified	unidentified	Pleosporales sp
New.CleanUp.ReferenceOTU3350	2.91705	0.336995	0.78005	0.432017	0.665729	0.744983	Ascomycota	Dothideomycetes	Pleosporales	Pleosporaceae	Ulocladium	Ulocladium chartarum
New.ReferenceOTU1705	1.00904	-0.634821	1.48108	-0.428619	0.6682	0.746702	Ascomycota	Dothideomycetes	Capnodiales	Capnodiaceae	Capnodium	Capnodium sp
New.ReferenceOTU2443	9.30095	-0.185727	0.442319	-0.419894	0.674563	0.75276	Basidiomycota	Tremellomycetes	Tremellales	Incertae sedis	Cryptococcus	Cryptococcus wieringae
New.ReferenceOTU2177	1.04904	0.546696	1.36657	0.400051	0.689119	0.76793	Ascomycota	Dothideomycetes	Myriangiales	Incertae sedis	Endosporium	Endosporium sp
New.ReferenceOTU733	5.59235	-0.244791	0.620803	-0.394313	0.69335	0.770052	Ascomycota	Dothideomycetes	Capnodiales	unidentified	unidentified	Capnodiales sp
New.ReferenceOTU2485	0.892433	0.438613	1.1165	0.392845	0.694434	0.770052	Ascomycota	unidentified	unidentified	unidentified	unidentified	ascomycete sp IZ_962
New.ReferenceOTU2459	0.983388	0.350362	0.893225	0.392244	0.694878	0.770052	Ascomycota	Dothideomycetes	Pleosporales	Sporormiaceae	Preussia	Preussia flanaganii
New.ReferenceOTU1539	3.06265	-0.380667	0.969428	-0.392672	0.694562	0.770052	unidentified	unidentified	unidentified	unidentified	unidentified	uncultured fungus
New.ReferenceOTU1563	1.06979	-0.396442	1.02675	-0.386114	0.699412	0.772751	Ascomycota	Eurotiomycetes	Chaetothyriales	Herpotrichiellaceae	Phaeomoniella	Phaeomoniella sp
New.ReferenceOTU1512	2.68589	0.293409	0.75981	0.386161	0.699377	0.772751	Ascomycota	Dothideomycetes	Capnodiales	Mycosphaerellaceae	Mycosphaerella	Mycosphaerella sp CPC 12200
New.CleanUp.ReferenceOTU1476	1.06453	-0.528764	1.3733	-0.38503	0.700215	0.772751	Ascomycota	Dothideomycetes	Pleosporales	Pleosporaceae	Alternaria	Alternaria solani
New.ReferenceOTU291	4.56457	-0.268659	0.70659	-0.380219	0.703783	0.775617	Ascomycota	Sordariomycetes	Xylariales	Amphisphaeriaceae	unidentified	Amphisphaeriaceae sp
New.ReferenceOTU493	5.28076	-0.333132	0.882384	-0.377537	0.705775	0.776741	unidentified	unidentified	unidentified	unidentified	unidentified	Fungi sp
New.ReferenceOTU900	3.36492	0.180737	0.482968	0.37422	0.70824	0.778382	Ascomycota	Dothideomycetes	Pleosporales	Incertae sedis	Periconia	Periconia sp
New.ReferenceOTU682	3.65643	0.321893	0.865055	0.372106	0.709814	0.77904	Ascomycota	Dothideomycetes	Pleosporales	unidentified	unidentified	Pleosporales sp
New.ReferenceOTU1884	0.814442	-0.906114	2.45009	-0.369828	0.71151	0.779329	Basidiomycota	Agaricomycetes	Agaricales	unidentified	unidentified	Agaricales sp
New.ReferenceOTU1930	1.66805	-0.392803	1.06412	-0.369134	0.712028	0.779329	Ascomycota	Dothideomycetes	Pleosporales	Phaeosphaeriaceae	Sclerostagonospora	Sclerostagonospora sp
New.ReferenceOTU1370	15.1217	0.218676	0.597853	0.365769	0.714537	0.781006	Ascomycota	Dothideomycetes	Pleosporales	Pleosporaceae	unidentified	Pleosporaceae sp
New.ReferenceOTU297	8.37472	-0.184126	0.507347	-0.362919	0.716665	0.781194	Ascomycota	Dothideomycetes	Pleosporales	Incertae sedis	Phoma	Phoma puncteliae
New.ReferenceOTU1788	12.6171	0.20211	0.555383	0.363911	0.715924	0.781194	Ascomycota	Dothideomycetes	Pleosporales	Phaeosphaeriaceae	Neostagonospora	Neostagonospora caricis
New.ReferenceOTU1822	1.97821	-0.275601	0.768642	-0.358556	0.719928	0.783681	Ascomycota	Eurotiomycetes	Chaetothyriales	Herpotrichiellaceae	unidentified	Herpotrichiellaceae sp
New.ReferenceOTU1583	7.76691	0.277952	0.799351	0.347722	0.728049	0.791444	Ascomycota	Dothideomycetes	Pleosporales	Sporormiaceae	unidentified	Preussia sp BLE35
New.ReferenceOTU667	1.85339	0.30308	0.901152	0.336325	0.736626	0.799679	Ascomycota	Dothideomycetes	Pleosporales	Phaeosphaeriaceae	Phaeosphaeriopsis	Phaeosphaeriopsis nolinae
New.ReferenceOTU4	1.01771	-0.488664	1.47905	-0.33039	0.741105	0.80345	Ascomycota	unidentified	unidentified	unidentified	unidentified	Ascomycota sp
New.ReferenceOTU2323	9.15471	0.255314	0.821159	0.310919	0.755863	0.818339	unidentified	unidentified	unidentified	unidentified	unidentified	Fungi sp
New.ReferenceOTU1130	1.38393	-0.315106	1.04863	-0.300492	0.763802	0.825815	Basidiomycota	Agaricomycetes	Agaricales	Agaricaceae	Coprinus	Coprinus foetidellus
New.ReferenceOTU1411	0.677872	-0.383057	1.3095	-0.292521	0.769888	0.829031	Basidiomycota	Agaricostilbomycetes	unidentified	unidentified	unidentified	Agaricostilbomycetes sp
New.ReferenceOTU586	0.941517	0.404267	1.37055	0.294967	0.768019	0.829031	Ascomycota	Dothideomycetes	Capnodiales	Teratosphaeriaceae	unidentified	Teratosphaeriaceae sp
New.ReferenceOTU2280	381.541	-0.120254	0.410191	-0.293165	0.769396	0.829031	Basidiomycota	Tremellomycetes	Tremellales	Incertae sedis	Cryptococcus	Cryptococcus victoriae
New.ReferenceOTU2486	31.5087	-0.182345	0.644173	-0.283068	0.777124	0.835696	Ascomycota	Sordariomycetes	Xylariales	unidentified	unidentified	Xylariales sp
New.ReferenceOTU1651	6.15845	0.124071	0.440747	0.281501	0.778326	0.835864	Basidiomycota	Ustilaginomycetes	Ustilaginales	Ustilaginaceae	Sporisorium	Sporisorium puellare
New.ReferenceOTU150	1.87516	0.255811	0.914327	0.27978	0.779646	0.836157	unidentified	unidentified	unidentified	unidentified	unidentified	fungal sp EXP0528F
New.ReferenceOTU1580	1.73924	0.3182	1.19118	0.26713	0.789369	0.845451	Ascomycota	Dothideomycetes	Pleosporales	unidentified	unidentified	Pleosporales sp
New.ReferenceOTU81	1.40223	-0.390996	1.53512	-0.2547	0.798954	0.854571	Ascomycota	Lecanoromycetes	Teloschistales	Physciaceae	Physcia	Physcia tribacia
New.ReferenceOTU1142	0.872529	-0.269195	1.06832	-0.251981	0.801056	0.855673	Basidiomycota	Microbotryomycetes	Sporidiobolales	Incertae sedis	Sporobolomyces	Sporobolomyces elongatus
New.ReferenceOTU2425	1.0115	0.201465	0.817583	0.246415	0.805361	0.859123	Ascomycota	Sordariomycetes	Xylariales	Xylariaceae	Barrmaelia	Barrmaelia macrospora
New.ReferenceOTU2292	2.44527	-0.210547	0.869688	-0.242094	0.808707	0.861543	Ascomycota	Eurotiomycetes	Chaetothyriales	Herpotrichiellaceae	Capronia	Capronia peltigerae
New.ReferenceOTU2224	16.4869	-0.111698	0.467668	-0.238841	0.811229	0.863078	Ascomycota	Dothideomycetes	Pleosporales	Phaeosphaeriaceae	Sclerostagonospora	Sclerostagonospora sp 87 YS_2010
New.ReferenceOTU2106	1.62128	0.253869	1.06995	0.237271	0.812446	0.863085	unidentified	unidentified	unidentified	unidentified	unidentified	fungal sp EXP0528F
New.ReferenceOTU1459	13.3251	-0.139043	0.589046	-0.236048	0.813395	0.863085	Ascomycota	Sordariomycetes	Xylariales	Amphisphaeriaceae	Seimatosporium	Seimatosporium hypericinum
New.ReferenceOTU1994	0.813234	-0.308366	1.33894	-0.230306	0.817854	0.866665	Ascomycota	Dothideomycetes	Capnodiales	Teratosphaeriaceae	unidentified	Teratosphaeriaceae sp
New.ReferenceOTU572	4.99402	-0.181727	0.805242	-0.22568	0.82145	0.869323	Basidiomycota	Agaricomycetes	Agaricales	Agaricaceae	Bovista	Bovista paludosa
New.ReferenceOTU696	1.62289	-0.179793	0.827626	-0.21724	0.828022	0.871659	Basidiomycota	Agaricomycetes	Agaricales	Psathyrellaceae	Coprinellus	Coprinellus impatiens
New.ReferenceOTU356	1.00436	0.262716	1.19411	0.220009	0.825864	0.871659	Zygomycota	Incertae sedis	Mortierellales	Mortierellaceae	unidentified	Mortierellaceae sp
New.ReferenceOTU1867	1.07978	-0.280146	1.28722	-0.217637	0.827712	0.871659	Ascomycota	Leotiomycetes	Erysiphales	Erysiphaceae	Erysiphe	Erysiphe betae
New.CleanUp.ReferenceOTU4349	101.401	0.0634988	0.289594	0.219269	0.826441	0.871659	Ascomycota	Dothideomycetes	Capnodiales	Davidiellaceae	Davidiella	Davidiella tassiana
New.ReferenceOTU2296	1.33813	0.24805	1.16285	0.213311	0.831084	0.873732	Ascomycota	Eurotiomycetes	Eurotiales	Trichocomaceae	Aspergillus	Aspergillus tubingensis
New.ReferenceOTU300	1.13258	0.284285	1.38939	0.204612	0.837876	0.879714	Ascomycota	Lecanoromycetes	Lecanorales	Ramalinaceae	Ramalina	Ramalina pollinaria
New.ReferenceOTU656	37.6408	-0.0998656	0.494511	-0.201948	0.839957	0.880742	Ascomycota	Dothideomycetes	unidentified	unidentified	unidentified	Dothideomycetes sp
New.ReferenceOTU1257	24.4282	0.101203	0.51297	0.197289	0.843601	0.882541	Ascomycota	Dothideomycetes	Pleosporales	unidentified	unidentified	Pleosporales sp
New.ReferenceOTU2228	1.30205	-0.26285	1.33473	-0.196931	0.843881	0.882541	Ascomycota	Lecanoromycetes	Peltigerales	Pannariaceae	Degelia	Degelia plumbea
New.ReferenceOTU1936	3.67025	0.111658	0.61434	0.181753	0.855776	0.893811	Basidiomycota	Tremellomycetes	Tremellales	Incertae sedis	unidentified	Tremellales sp
New.ReferenceOTU406	1.36869	-0.208841	1.16983	-0.178522	0.858313	0.89529	Basidiomycota	Agaricomycetes	Agaricales	unidentified	unidentified	Agaricales sp
New.ReferenceOTU2477	0.784967	-0.17258	1.00241	-0.172165	0.863308	0.899326	Ascomycota	Dothideomycetes	Pleosporales	unidentified	unidentified	Pleosporales sp
New.ReferenceOTU153	1.44523	0.249835	1.54859	0.16133	0.871833	0.905845	Basidiomycota	Agaricomycetes	Agaricales	unidentified	unidentified	Agaricales sp
New.ReferenceOTU982	1.23048	0.154147	0.94794	0.162613	0.870823	0.905845	Ascomycota	Sordariomycetes	Hypocreales	Incertae sedis	Stachybotrys	Stachybotrys chartarum
New.ReferenceOTU1410	0.847987	-0.208428	1.34224	-0.155284	0.876597	0.90928	Ascomycota	unidentified	unidentified	unidentified	unidentified	uncultured Ascomycota
New.ReferenceOTU2403	4.33549	-0.143629	0.931166	-0.154247	0.877415	0.90928	Ascomycota	Dothideomycetes	Dothideales	unidentified	unidentified	Dothideales sp
New.ReferenceOTU1600	0.732282	-0.260636	1.74964	-0.148966	0.881581	0.912337	Ascomycota	Dothideomycetes	Dothideales	Dothioraceae	Sydowia	Sydowia sp
New.ReferenceOTU1724	0.861241	0.135091	0.915179	0.147612	0.882649	0.912337	Ascomycota	Dothideomycetes	Hysteriales	Hysteriaceae	Gloniopsis	Gloniopsis sp MFLUCC 12_0010
New.ReferenceOTU2273	0.835584	0.17881	1.31732	0.135738	0.892028	0.920841	Ascomycota	Dothideomycetes	Capnodiales	unidentified	unidentified	Neodevriesiaceae sp CCFEE 5569
New.ReferenceOTU2040	2.30949	0.100682	0.770561	0.13066	0.896044	0.923792	Ascomycota	Dothideomycetes	Capnodiales	unidentified	unidentified	Capnodiales sp
New.ReferenceOTU728	1.50369	-0.116648	0.971299	-0.120095	0.904408	0.931214	Ascomycota	Dothideomycetes	Pleosporales	Massarinaceae	unidentified	uncultured Saccharicola
New.ReferenceOTU577	1.06251	0.131408	1.1274	0.116558	0.90721	0.931698	Ascomycota	Eurotiomycetes	Eurotiales	Trichocomaceae	Penicillium	Penicillium spinulosum
New.ReferenceOTU769	12.7402	-0.0415927	0.35355	-0.117643	0.90635	0.931698	Ascomycota	Lecanoromycetes	Ostropales	Stictidaceae	Glomerobolus	Glomerobolus gelineus
New.ReferenceOTU1916	0.856057	-0.122843	1.07719	-0.11404	0.909206	0.932549	Ascomycota	Eurotiomycetes	Chaetothyriales	unidentified	unidentified	Chaetothyriales sp
New.ReferenceOTU508	1.80187	-0.0827676	0.804283	-0.102908	0.918036	0.940398	unidentified	unidentified	unidentified	unidentified	unidentified	fungal sp TRN254
New.ReferenceOTU1738	1.16501	-0.0955532	0.944186	-0.101202	0.91939	0.94058	Ascomycota	Dothideomycetes	Pleosporales	unidentified	unidentified	Pleosporales sp
New.ReferenceOTU838	3.01705	-0.0677541	0.725638	-0.0933717	0.925608	0.94573	Ascomycota	Sordariomycetes	Xylariales	Xylariaceae	unidentified	Xylariales sp M71
New.ReferenceOTU1983	0.721227	-0.0837955	0.962381	-0.087071	0.930615	0.949632	Basidiomycota	Agaricomycetes	Agaricales	Lycoperdaceae	unidentified	Lycoperdaceae sp
New.ReferenceOTU870	1.94467	-0.0734818	0.89898	-0.0817391	0.934854	0.95274	Basidiomycota	Agaricomycetes	Agaricales	unidentified	unidentified	Agaricales sp
New.ReferenceOTU690	3.38041	0.0568775	0.795343	0.0715132	0.942989	0.959807	Ascomycota	Sordariomycetes	Sordariales	Chaetomiaceae	Humicola	Humicola grisea var. grisea
New.ReferenceOTU1300	0.931602	0.07001	1.0073	0.0695025	0.94459	0.959948	Ascomycota	unidentified	unidentified	unidentified	unidentified	Ascomycota sp
New.ReferenceOTU1726	0.756083	-0.066663	0.975751	-0.0683197	0.945531	0.959948	Ascomycota	Dothideomycetes	Pleosporales	Pleosporaceae	unidentified	Pleosporaceae sp
New.ReferenceOTU1692	0.951699	0.0605885	0.943029	0.0642488	0.948772	0.960454	Basidiomycota	Agaricomycetes	Agaricales	Strophariaceae	Psilocybe	Psilocybe sp
New.ReferenceOTU2462	0.799403	0.0800323	1.22727	0.0652114	0.948006	0.960454	Ascomycota	Dothideomycetes	Pleosporales	unidentified	unidentified	Pleosporales sp
New.ReferenceOTU2285	0.98396	-0.0451344	0.714545	-0.0631652	0.949635	0.960454	Ascomycota	Dothideomycetes	Dothideales	Dothideaceae	Endoconidioma	Endoconidioma populi
New.ReferenceOTU1590	2.6499	-0.0271717	0.664223	-0.0409075	0.96737	0.975414	Ascomycota	Dothideomycetes	Capnodiales	Davidiellaceae	Cladosporium	Cladosporium exasperatum
New.ReferenceOTU1578	34.3811	0.0170497	0.426191	0.0400049	0.968089	0.975414	Ascomycota	Sordariomycetes	Xylariales	Amphisphaeriaceae	Truncatella	Truncatella angustata
New.ReferenceOTU755	0.924301	-0.0539536	1.25654	-0.0429381	0.965751	0.975414	Basidiomycota	Agaricomycetes	Russulales	Peniophoraceae	unidentified	Peniophoraceae sp
New.CleanUp.ReferenceOTU2483	2.79214	0.017411	0.915037	0.0190277	0.984819	0.991021	Ascomycota	Dothideomycetes	Pleosporales	unidentified	unidentified	fungal endophyte WMS23
New.ReferenceOTU1525	2.30884	0.0111491	0.776262	0.0143626	0.988541	0.993515	Ascomycota	Dothideomycetes	Pleosporales	Testudinaceae	Lepidosphaeria	Lepidosphaeria nicotiae
New.ReferenceOTU2387	2.0673	-0.00466903	0.637908	-0.0073193	0.99416	0.995406	Ascomycota	Dothideomycetes	Dothideales	Dothioraceae	Aureobasidium	Aureobasidium pullulans
New.ReferenceOTU876	1.31059	0.014533	1.42238	0.0102174	0.991848	0.995406	Basidiomycota	Agaricomycetes	Geastrales	Geastraceae	Geastrum	Geastrum lageniforme
New.ReferenceOTU642	1.61074	-0.00587407	0.78621	-0.00747138	0.994039	0.995406	Ascomycota	Incertae sedis	Incertae sedis	Incertae sedis	Torula	Torula sp
New.ReferenceOTU2243	2.68123	-0.000402931	0.57334	-0.000702778	0.999439	0.999439	Ascomycota	Dothideomycetes	Pleosporales	Lophiostomataceae	Lophiostoma	Lophiostoma sp DMW2181
New.ReferenceOTU917	0.521133	-2.59966	2.75987	-0.941949	0.346219	NA	Ascomycota	Dothideomycetes	Incertae sedis	Micropeltidaceae	Stomiopeltis	Stomiopeltis sp T36A1b
New.ReferenceOTU1886	0.273981	0.73711	2.16742	0.340086	0.733792	NA	Ascomycota	Dothideomycetes	Capnodiales	Davidiellaceae	Davidiella	Davidiella tassiana
New.ReferenceOTU1064	0.222874	0.347807	2.25394	0.154311	0.877365	NA	Ascomycota	Lecanoromycetes	unidentified	unidentified	unidentified	Lecanoromycetes sp
New.ReferenceOTU451	0.442525	-2.25358	1.57429	-1.4315	0.152288	NA	Basidiomycota	Agaricomycetes	Auriculariales	Incertae sedis	Elmerina	Elmerina holophaea
New.ReferenceOTU855	0.657165	-1.91598	2.12102	-0.90333	0.366351	NA	Ascomycota	Dothideomycetes	unidentified	unidentified	unidentified	Dothideomycetes sp
New.ReferenceOTU858	0.383729	1.08629	2.1391	0.507826	0.611575	NA	Basidiomycota	Microbotryomycetes	Sporidiobolales	Incertae sedis	Rhodotorula	Rhodotorula nothofagi
New.ReferenceOTU1729	0.476046	1.56784	1.32025	1.18753	0.235017	NA	Ascomycota	Sordariomycetes	Hypocreales	Incertae sedis	Acremonium	Acremonium implicatum
New.ReferenceOTU2031	0.458852	2.14609	1.78312	1.20356	0.22876	NA	Basidiomycota	Pucciniomycetes	Pucciniales	Incertae sedis	Aecidium	Aecidium sp PUR 43011
New.ReferenceOTU1071	0	NA	NA	NA	NA	NA	Ascomycota	Incertae sedis	Incertae sedis	Incertae sedis	Vermispora	Vermispora spermatophaga
New.ReferenceOTU1072	0.133328	-0.559612	2.84577	-0.196647	0.844104	NA	Ascomycota	Lecanoromycetes	Teloschistales	Physciaceae	Hyperphyscia	Hyperphyscia adglutinata
New.ReferenceOTU1677	0.0719802	-0.0339158	2.96435	-0.0114412	0.990871	NA	Ascomycota	Dothideomycetes	Pleosporales	Pleosporaceae	Alternaria	Alternaria helianthiinficiens
New.ReferenceOTU306	0.513456	-1.41606	1.691	-0.83741	0.402362	NA	Ascomycota	Dothideomycetes	Capnodiales	Davidiellaceae	Cladosporium	Cladosporium exasperatum
New.ReferenceOTU1302	0.200671	-0.0257287	2.59761	-0.00990477	0.992097	NA	Ascomycota	Eurotiomycetes	Eurotiales	Trichocomaceae	Penicillium	Penicillium bialowiezense
New.ReferenceOTU1092	0	0	0	0	1	NA	Ascomycota	Sordariomycetes	unidentified	unidentified	unidentified	Sordariomycetes sp
New.ReferenceOTU1546	0.436249	-0.8797	1.94763	-0.451677	0.651501	NA	Ascomycota	Dothideomycetes	Capnodiales	Teratosphaeriaceae	unidentified	Teratosphaeriaceae sp
New.ReferenceOTU843	0.449829	0.875294	0.974997	0.897741	0.369324	NA	Ascomycota	Sordariomycetes	Microascales	Microascaceae	Microascus	Microascus brevicaulis
New.ReferenceOTU353	0.332937	-2.00128	2.92258	-0.684764	0.493493	NA	Ascomycota	Orbiliomycetes	unidentified	unidentified	unidentified	Orbiliomycetes sp
New.ReferenceOTU1935	0.34326	0.668286	1.69589	0.394062	0.693535	NA	Basidiomycota	Agaricomycetes	Agaricales	Psathyrellaceae	Coprinopsis	Coprinopsis phlyctidospora
New.ReferenceOTU1428	0.0642999	-0.0339158	2.96435	-0.0114412	0.990871	NA	unidentified	unidentified	unidentified	unidentified	unidentified	fungal sp FG7
New.ReferenceOTU1331	0.0369922	0.24547	2.96408	0.082815	0.933999	NA	Basidiomycota	Microbotryomycetes	Sporidiobolales	Incertae sedis	Rhodotorula	Rhodotorula aurantiaca
New.ReferenceOTU1338	0.457467	-2.211	2.8582	-0.773564	0.439189	NA	Ascomycota	Dothideomycetes	Capnodiales	Teratosphaeriaceae	unidentified	Teratosphaeriaceae sp
New.ReferenceOTU431	0	0	0	0	1	NA	Ascomycota	Sordariomycetes	Hypocreales	Incertae sedis	Acremonium	Acremonium sp
New.ReferenceOTU949	0.541685	-1.37351	1.34628	-1.02023	0.307618	NA	unidentified	unidentified	unidentified	unidentified	unidentified	Fungi sp
New.ReferenceOTU1431	0.268512	-1.30555	1.89485	-0.688998	0.490825	NA	Basidiomycota	Tremellomycetes	Tremellales	Incertae sedis	Cryptococcus	Cryptococcus sp CBS 12710
New.ReferenceOTU738	0.53866	-2.6191	2.77029	-0.945423	0.344443	NA	Ascomycota	Dothideomycetes	Capnodiales	unidentified	unidentified	Capnodiales sp
New.ReferenceOTU425	0.108003	0.641119	2.96223	0.216431	0.828652	NA	Ascomycota	Eurotiomycetes	Onygenales	Ajellomycetaceae	Ajellomyces	Ajellomyces capsulatus
New.ReferenceOTU421	0	0	0	0	1	NA	Ascomycota	unidentified	unidentified	unidentified	unidentified	ascomycete sp MA 4905
New.ReferenceOTU133	0	0	0	0	1	NA	unidentified	unidentified	unidentified	unidentified	unidentified	uncultured fungus
New.ReferenceOTU2002	0.331747	-1.99448	2.95418	-0.675137	0.499589	NA	Basidiomycota	Agaricomycetes	Agaricales	unidentified	unidentified	Agaricales sp
New.ReferenceOTU1687	0.588717	0.373959	0.921385	0.405866	0.684841	NA	Ascomycota	Dothideomycetes	Pleosporales	Pleosporaceae	Curvularia	Curvularia inaequalis
New.ReferenceOTU1684	0.375997	-1.92773	1.83735	-1.04919	0.294091	NA	Ascomycota	Dothideomycetes	Pleosporales	unidentified	unidentified	Pleosporales sp
New.ReferenceOTU1689	0.496458	1.18418	2.15931	0.548408	0.583412	NA	unidentified	unidentified	unidentified	unidentified	unidentified	uncultured fungus
New.ReferenceOTU2492	0.221098	-1.35475	2.63674	-0.513796	0.607394	NA	Basidiomycota	Agaricomycetes	Agaricales	unidentified	unidentified	Agaricales sp
New.ReferenceOTU898	0.469888	0.569875	1.71715	0.331873	0.739985	NA	Basidiomycota	Agaricomycetes	Agaricales	Agaricaceae	Coprinus	Coprinus comatus
New.ReferenceOTU2262	0.356916	-1.27386	1.88192	-0.676896	0.498472	NA	Ascomycota	Eurotiomycetes	Eurotiales	Trichocomaceae	Aspergillus	Aspergillus sp YM3
New.ReferenceOTU568	0.498147	-1.30744	1.84191	-0.709827	0.477811	NA	unidentified	unidentified	unidentified	unidentified	unidentified	uncultured fungus
New.ReferenceOTU620	0.295249	-0.15103	1.86415	-0.0810183	0.935427	NA	Ascomycota	Dothideomycetes	Capnodiales	Capnodiaceae	Capnodium	Capnodium sp FF_2011
New.ReferenceOTU1238	0.581643	1.96794	1.47939	1.33024	0.18344	NA	Ascomycota	Saccharomycetes	Saccharomycetales	Incertae sedis	Candida	Candida smithsonii
New.ReferenceOTU1120	0.577283	-1.62251	2.40447	-0.67479	0.499809	NA	Ascomycota	Dothideomycetes	Capnodiales	Mycosphaerellaceae	Xenosonderhenia	Xenosonderhenia syzygii
New.ReferenceOTU1341	0.565663	0.734085	1.53726	0.477529	0.632985	NA	Ascomycota	Sordariomycetes	Xylariales	Amphisphaeriaceae	Phlogicylindrium	Phlogicylindrium eucalyptorum
New.ReferenceOTU154	0.559864	-2.66595	2.74732	-0.970383	0.331856	NA	Ascomycota	Dothideomycetes	Pleosporales	unidentified	unidentified	Pleosporales sp
New.ReferenceOTU2246	0.267148	-0.104547	2.28166	-0.0458208	0.963453	NA	Ascomycota	Eurotiomycetes	Chaetothyriales	unidentified	unidentified	Chaetothyriales sp
New.ReferenceOTU2249	0.185942	0.858233	2.26102	0.379578	0.704259	NA	Ascomycota	Saccharomycetes	Saccharomycetales	Saccharomycodaceae	Hanseniaspora	Hanseniaspora uvarum
New.ReferenceOTU976	0.296485	0.389425	2.5331	0.153735	0.877819	NA	Ascomycota	Dothideomycetes	Pleosporales	Pleosporaceae	Alternaria	Alternaria solani
New.ReferenceOTU2115	0.116443	0.665246	2.96208	0.224587	0.8223	NA	Ascomycota	Saccharomycetes	Saccharomycetales	Saccharomycodaceae	Hanseniaspora	Hanseniaspora uvarum
New.ReferenceOTU2118	0	0	0	0	1	NA	Ascomycota	Eurotiomycetes	Mycocaliciales	Mycocaliciaceae	Chaenothecopsis	Chaenothecopsis resinophila
New.ReferenceOTU1801	0.199525	0.466872	2.61454	0.178568	0.858277	NA	Ascomycota	unidentified	unidentified	unidentified	unidentified	Ascomycota sp
New.ReferenceOTU1802	0.622183	2.05624	1.12457	1.82847	0.067479	NA	Ascomycota	Dothideomycetes	Pleosporales	Pleosporaceae	Alternaria	Alternaria alternata
New.ReferenceOTU1114	0.552061	0.493539	1.62226	0.30423	0.760952	NA	Ascomycota	Dothideomycetes	Pleosporales	Pleosporaceae	Drechslera	Drechslera poae
New.ReferenceOTU1599	0.167934	-1.35693	2.96097	-0.458274	0.646756	NA	Ascomycota	Dothideomycetes	Capnodiales	Mycosphaerellaceae	unidentified	Mycosphaerellaceae sp
New.ReferenceOTU1591	0.299103	-1.55935	2.95902	-0.526981	0.598207	NA	Ascomycota	Leotiomycetes	Rhytismatales	Rhytismataceae	Lophodermium	Lophodermium sp 0705HL2
New.ReferenceOTU1579	0.0661285	0.142339	2.96392	0.0480239	0.961697	NA	Ascomycota	Saccharomycetes	Saccharomycetales	Incertae sedis	Debaryomyces	Debaryomyces nepalensis
New.ReferenceOTU1374	0	NA	NA	NA	NA	NA	Ascomycota	unidentified	unidentified	unidentified	unidentified	Ascomycota sp
New.ReferenceOTU164	0.416937	-0.21896	1.11172	-0.196956	0.843862	NA	Basidiomycota	Agaricostilbomycetes	Agaricostilbales	Agaricostilbaceae	Bensingtonia	Bensingtonia sp PYCC 5562
New.ReferenceOTU2476	0.644488	-1.00967	1.17474	-0.859485	0.390073	NA	Ascomycota	Dothideomycetes	Capnodiales	unidentified	unidentified	Capnodiales sp
New.ReferenceOTU187	0	NA	NA	NA	NA	NA	Ascomycota	Saccharomycetes	Saccharomycetales	Saccharomycodaceae	Hanseniaspora	Hanseniaspora uvarum
New.ReferenceOTU501	0.0422241	-0.357227	2.96442	-0.120505	0.904083	NA	Ascomycota	Dothideomycetes	Capnodiales	Davidiellaceae	Davidiella	Davidiella tassiana
New.ReferenceOTU1815	0.410344	0.584239	1.89651	0.30806	0.758036	NA	Basidiomycota	Agaricostilbomycetes	Agaricostilbales	Agaricostilbaceae	Bensingtonia	Bensingtonia sp PYCC 5566
New.ReferenceOTU776	0	0	0	0	1	NA	unidentified	unidentified	unidentified	unidentified	unidentified	uncultured fungus
New.ReferenceOTU1361	0.0807106	0.41122	2.96349	0.138762	0.889638	NA	Ascomycota	Eurotiomycetes	Chaetothyriales	Herpotrichiellaceae	Capronia	Capronia sp
New.ReferenceOTU1365	0.0826948	-0.703742	2.96375	-0.23745	0.812308	NA	unidentified	unidentified	unidentified	unidentified	unidentified	uncultured fungus
New.ReferenceOTU1367	0.293691	0.216644	2.95964	0.0731994	0.941647	NA	Ascomycota	Sordariomycetes	Incertae sedis	Plectosphaerellaceae	Verticillium	Verticillium dahliae
New.ReferenceOTU172	0.382718	1.10249	2.48545	0.443576	0.657349	NA	Ascomycota	Dothideomycetes	Pleosporales	unidentified	unidentified	Pleosporales sp
New.ReferenceOTU2463	0.12303	0.302637	2.96392	0.102107	0.918672	NA	Ascomycota	Saccharomycetes	Saccharomycetales	Incertae sedis	unidentified	Saccharomycetales sp
New.ReferenceOTU993	0.387726	-0.97613	1.85728	-0.525569	0.599188	NA	Ascomycota	Sordariomycetes	Xylariales	unidentified	unidentified	Xylariales sp
New.ReferenceOTU1486	0.374357	1.27834	1.87498	0.681788	0.495373	NA	Ascomycota	Eurotiomycetes	Eurotiales	Trichocomaceae	Aspergillus	Aspergillus sydowii
New.ReferenceOTU2457	0.325323	-0.527124	1.20798	-0.436367	0.662571	NA	Ascomycota	Dothideomycetes	Capnodiales	Teratosphaeriaceae	Catenulostroma	Catenulostroma eucalyptorum
New.ReferenceOTU2454	0.637687	2.20718	1.09252	2.02027	0.0433556	NA	Basidiomycota	Agaricomycetes	Agaricales	unidentified	unidentified	Agaricales sp
New.ReferenceOTU2140	0.38173	0.600827	1.87434	0.320553	0.748549	NA	Ascomycota	Lecanoromycetes	Lecanorales	Parmeliaceae	Parmotrema	Parmotrema fistulatum
New.ReferenceOTU1544	0.629683	1.80483	0.99327	1.81706	0.0692082	NA	Basidiomycota	Ustilaginomycetes	Ustilaginales	Ustilaginaceae	unidentified	Ustilaginaceae sp
New.ReferenceOTU351	0.518556	-2.56729	2.38434	-1.07673	0.281599	NA	Basidiomycota	Tremellomycetes	unidentified	unidentified	unidentified	Tremellomycetes sp
New.ReferenceOTU357	0	NA	NA	NA	NA	NA	Ascomycota	unidentified	unidentified	unidentified	unidentified	Ascomycota sp
New.ReferenceOTU355	0.38977	-0.783981	1.48783	-0.526928	0.598243	NA	Ascomycota	Lecanoromycetes	Rhizocarpales	Catillariaceae	Catillaria	Catillaria nigroclavata
New.ReferenceOTU359	0.241275	0.383444	2.9616	0.129472	0.896984	NA	Ascomycota	Dothideomycetes	unidentified	unidentified	unidentified	Dothideomycetes sp
New.ReferenceOTU1556	0.0844481	-0.525095	2.96422	-0.177144	0.859395	NA	Basidiomycota	Microbotryomycetes	Sporidiobolales	Incertae sedis	Rhodotorula	Rhodotorula acheniorum
New.ReferenceOTU2437	0.361988	-2.10151	2.89906	-0.724895	0.468516	NA	Ascomycota	unidentified	unidentified	unidentified	unidentified	uncultured Ascomycota
New.ReferenceOTU2383	0.267568	-1.56806	2.15463	-0.727765	0.466758	NA	unidentified	unidentified	unidentified	unidentified	unidentified	uncultured fungus
New.ReferenceOTU814	0	NA	NA	NA	NA	NA	Ascomycota	Saccharomycetes	Saccharomycetales	Incertae sedis	Candida	Candida fennica
New.ReferenceOTU1299	0.155947	-0.72282	2.96331	-0.243923	0.80729	NA	Ascomycota	Dothideomycetes	Capnodiales	Mycosphaerellaceae	Pseudocercospora	Pseudocercospora sphaerulinae
New.ReferenceOTU1700	0.0410099	-0.0366318	2.96442	-0.0123572	0.990141	NA	Basidiomycota	Agaricomycetes	Atheliales	Atheliaceae	unidentified	Atheliaceae sp
New.ReferenceOTU1593	0.374935	-0.0601892	1.66874	-0.0360686	0.971228	NA	Ascomycota	unidentified	unidentified	unidentified	unidentified	Ascomycota sp
New.ReferenceOTU2396	0.225938	0.713603	1.93659	0.368485	0.712512	NA	Ascomycota	Incertae sedis	Incertae sedis	Pseudeurotiaceae	unidentified	Pseudeurotiaceae sp
New.ReferenceOTU2082	0.138674	0.492625	2.96215	0.166306	0.867916	NA	Ascomycota	Eurotiomycetes	Eurotiales	Trichocomaceae	Penicillium	Penicillium sp
New.ReferenceOTU2255	0	0	0	0	1	NA	Basidiomycota	Agaricomycetes	Agaricales	Inocybaceae	Inocybe	Inocybe sp
New.ReferenceOTU1026	0.288567	1.61034	2.52994	0.636514	0.524442	NA	Ascomycota	Sordariomycetes	Sordariales	Lasiosphaeriaceae	Cercophora	Cercophora sp
New.ReferenceOTU1048	0.0888716	0.126381	2.96435	0.0426338	0.965993	NA	Ascomycota	Eurotiomycetes	Eurotiales	Trichocomaceae	Penicillium	Penicillium christenseniae
New.ReferenceOTU659	0.175542	-0.525095	2.96422	-0.177144	0.859395	NA	unidentified	unidentified	unidentified	unidentified	unidentified	fungal sp TRN254
New.ReferenceOTU301	0.512205	0.959154	1.14547	0.837347	0.402398	NA	Basidiomycota	Agaricomycetes	Agaricales	unidentified	unidentified	Agaricales sp
New.ReferenceOTU1469	0.56157	1.82626	1.42375	1.28272	0.199591	NA	Ascomycota	unidentified	unidentified	unidentified	unidentified	Ascomycota sp
New.ReferenceOTU277	0.235393	0.243803	1.74744	0.13952	0.889039	NA	unidentified	unidentified	unidentified	unidentified	unidentified	fungal sp ARIZ AZ1110
New.ReferenceOTU1725	0.101608	-0.56908	2.96325	-0.192046	0.847706	NA	Ascomycota	Lecanoromycetes	Pertusariales	Pertusariaceae	Pertusaria	Pertusaria aff corallina BRY C56061
New.ReferenceOTU484	0.488948	1.2437	1.7893	0.695079	0.487006	NA	unidentified	unidentified	unidentified	unidentified	unidentified	fungal sp agrD488
New.ReferenceOTU644	0.550264	-0.953389	1.91772	-0.497148	0.619085	NA	Ascomycota	Dothideomycetes	Capnodiales	Mycosphaerellaceae	Xenosonderhenia	Xenosonderhenia syzygii
New.CleanUp.ReferenceOTU290	0.326738	-0.180584	1.4414	-0.125283	0.900299	NA	Ascomycota	Dothideomycetes	Pleosporales	Pleosporaceae	Bipolaris	Bipolaris brizae
New.CleanUp.ReferenceOTU528	0.618609	1.08525	1.42195	0.763211	0.445338	NA	Ascomycota	Dothideomycetes	Pleosporales	Phaeosphaeriaceae	unidentified	Phaeosphaeriaceae sp
New.CleanUp.ReferenceOTU1099	0.504758	-0.332352	0.996392	-0.333555	0.738715	NA	Ascomycota	Dothideomycetes	Capnodiales	Davidiellaceae	Cladosporium	Cladosporium exasperatum
New.CleanUp.ReferenceOTU3215	0.508909	0.997454	1.40762	0.708609	0.478567	NA	Ascomycota	Sordariomycetes	Sordariales	Chaetomiaceae	Chaetomium	Chaetomium sp
New.CleanUp.ReferenceOTU5853	0.456544	-0.602427	1.30003	-0.463395	0.643081	NA	Ascomycota	Dothideomycetes	unidentified	unidentified	unidentified	Dothideomycetes sp
